# Supplementary material for: Consent for the use of human biological samples for biomedical research: a mixed methods study exploring the UK public's preferences
Source: PubMed Central journal article supplement — BMJ Open. 2013 Aug 7;3(8):e003022. doi: 10.1136/bmjopen-2013-003022 (PMC3740244; doi:10.1136/bmjopen-2013-003022), 2013-08-07
Supplement: bmjopen-2013-003022.draft_revisions.pdf [file bmjopen-2013-003022.draft_revisions.pdf]

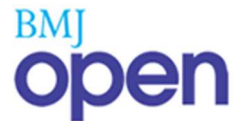

**Consent for the use of human biological samples for  
biomedical research – a mixed methods study exploring the  
UK public's preferences**

|                                    |                                                                                                                                                                                                                                                                                                                                                                                                                                                         |
|------------------------------------|---------------------------------------------------------------------------------------------------------------------------------------------------------------------------------------------------------------------------------------------------------------------------------------------------------------------------------------------------------------------------------------------------------------------------------------------------------|
| Journal:                           | <i>BMJ Open</i>                                                                                                                                                                                                                                                                                                                                                                                                                                         |
| Manuscript ID:                     | bmjopen-2013-003022                                                                                                                                                                                                                                                                                                                                                                                                                                     |
| Article Type:                      | Research                                                                                                                                                                                                                                                                                                                                                                                                                                                |
| Date Submitted by the Author:      | 09-Apr-2013                                                                                                                                                                                                                                                                                                                                                                                                                                             |
| Complete List of Authors:          | Lewis, Celine; Genetic Alliance UK, Unit 4D Leroy House<br>Clotworthy, Margaret; Human Focused Testing,<br>Hilton, Shona; Medical Research Council, CSO Social & Public Health<br>Sciences Unit<br>Magee, Caroline; National Cancer Research Institute, Confederation of<br>Cancer Biobanks<br>Robertson, Mark; AstraZeneca, Science Policy & Relations<br>Stubbins, Lesley; GlaxoSmithKline, Medicines Research Centre<br>Corfield, Jule; Areteva Ltd, |
| <b>Primary Subject<br>Heading</b>: | Public health                                                                                                                                                                                                                                                                                                                                                                                                                                           |
| Secondary Subject Heading:         | Ethics, Genetics and genomics, Health policy                                                                                                                                                                                                                                                                                                                                                                                                            |
| Keywords:                          | GENETICS, Health policy < HEALTH SERVICES ADMINISTRATION &<br>MANAGEMENT, PUBLIC HEALTH, MEDICAL ETHICS                                                                                                                                                                                                                                                                                                                                                 |
|                                    |                                                                                                                                                                                                                                                                                                                                                                                                                                                         |

SCHOLARONE™  
Manuscripts

only

**Consent for the use of human biological samples for biomedical research – a mixed methods study exploring the UK public’s preferences**

Celine Lewis<sup>1</sup>, Margaret Clotworthy<sup>2</sup>, Shona Hilton<sup>3</sup>, Caroline Magee<sup>4</sup>, Mark J Robertson<sup>5</sup>, Lesley J Stubbins<sup>6</sup>, Julie Corfield<sup>7</sup>

<sup>1</sup>Genetic Alliance UK, Unit 4D Leroy House, 436 Essex Road, London, N1 3LY, UK

<sup>2</sup>Human Focused Testing, 50 the Barns, Littleport, Cambridge, CB6 1GG, UK

<sup>3</sup>Medical Research Council/CSO Social & Public Health Sciences Unit, 4 Lilybank Gardens, Glasgow, G12 8RZ, UK

<sup>4</sup>Confederation of Cancer Biobanks, National Cancer Research Institute, Angel Building, 407 St John Street, London EC1V 4AD, UK

<sup>5</sup>AstraZeneca, Science Policy & Relations, 11G43 Mereside, Alderley Park, Macclesfield, Cheshire SK10 4TF, UK

<sup>6</sup>GlaxoSmithKline Medicines Research Centre, Gunnels Wood Road, Stevenage, Hertfordshire, SG1 2NY, UK

<sup>7</sup>Areteva Ltd, BioCity, Nottingham, NG1 1GF, UK

**Running title:** Consent for the use of biosamples - the UK public's preferences

**Correspondence to:**

Dr Celine Lewis

Genetic Alliance UK,

Unit 4D Leroy House,

436 Essex Road,

London,

N1 3QP

**Email:** celine@geneticalliance.org.uk

**Keywords:** consent, biobanking, public views, public preferences, biomedical research

**Word count:** 5306

**ABSTRACT**

**Objective:** A mixed methods study exploring the UK general public's views towards consent for the use of biosamples for biomedical research.

**Setting:** Cross-sectional population-based focus groups followed by an online survey.

**Participants:** Twelve focus groups (81 participants) selectively sampled to reflect a range of demographic groups; 1110 survey responders recruited through a stratified sampling method with quotas set on sex, age, geographical location, socio-economic group and ethnicity.

**Main outcome measures:** 1) Views on the importance of consent when donating residual biosamples for medical research; 2) preferences for opt-in or opt-out consent approaches; 3) preferences for different consent models.

**Results:** Participants believed obtaining consent for use of residual biosamples was important as it was "morally correct" to ask, and enabled people to make an active choice and retain control over their biosamples. Survey responders preferred opt-in consent (55%); the strongest predictor was being from a low socio-economic group (OR 2.22, 95% CI 1.41-3.57,  $p=0.001$ ) and having a religious affiliation (OR 1.36, 95% CI 1.01-1.81,  $p=0.04$ ). Focus group participants had a slight preference for opt-out consent because by using this approach more biosamples would be available and facilitate research. Concerning preferred models of consent for research use of biosamples, survey responders preferred specific consent with re-contact for each study for which their biosamples are eligible. Focus group participants preferred generic consent as it provided "flexibility for researchers" and reduced the likelihood that biosamples would be wasted. The strongest predictor for preferring specific consent was preferring opt-in consent (OR 4.58, 95% CI 3.30-6.35,  $p=0.015$ ) followed by non-'White' ethnicity (OR 2.94, 95% CI 1.23-7.14,  $p<0.001$ ).

**Conclusions:** There is a preference amongst the UK public for ongoing choice and control over donated biosamples, however increased knowledge and opportunity for discussion is associated with acceptance of less restrictive consent models for some people.

## ARTICLE SUMMARY

### Article focus

- To explore views of the UK public on the importance of consent being sought to the use of residual biosamples for medical research;
- The publics' preferences for opt-in or opt-out approaches to consent;
- The publics' preferences for generic, tiered or specific consent.

### Key messages

- Obtaining consent for the use of residual biosamples for biomedical research was perceived as important by members of the general public.
- Survey participants exhibited a desire to retain active choice and control when donating biosamples and over the uses to which their biosamples might be put, preferring an opt-in system and specific consent, however these results differ from those reported during focus group discussions, where preference was for less restrictive consent models (an opt-out system and generic consent) that are likely to increase availability of biosamples.
- These differences might be accounted for by the fact that focus group participants were given more background information about the use of residual biosamples in research and had time to consider the benefits and disadvantages of the different approaches.

### Strengths and limitations of this study

- This study contributes further to our understanding of the UK public's views and preferences towards consent for the use of biosamples in medical research. Our study supports the premise that increased knowledge and opportunity for discussion is associated with acceptance of less restrictive consent models.
- Due to the hypothetical nature of the study, the findings may not necessarily correlate with actual behaviour.

## INTRODUCTION

Human biological samples (biosamples), including organs, tissues, biofluids such as blood, and their derivatives, are increasingly important resources for biomedical research[1,2]. For example, they can help us to understand how we diagnose, categorise and treat a whole variety of medical conditions including cancer[1] and are particularly important when studying rare diseases or conditions where biosamples are hard to obtain. Biosamples are donated by either healthy volunteers or patients, either through specific research studies or as residual tissues or biofluids surplus to diagnostic requirements, or post mortem. Biosamples can be used fresh or can be first stored in a biobank, a collection of biosamples often linked with the donors' clinical and demographic information, as biosample attributes. Here, the quality of the data linked to the biosample is as important as the quality of the biosamples themselves, providing essential context within which to design analyses and interpret results or carry our further experimental studies. Clinical data may also be enriched with lifestyle and environmental information[3].

It is widely accepted that that donor consent should be sought and obtained before biosamples can be used in research[4,5]. Consent in research ethics relates to ensuring respect for the autonomy and dignity of the donors (research participants) and protecting them from abuse[5] and In fact, in England, Wales and Northern Ireland, the Human Tissue Act establishes donor consent as the baseline principle for the retention and use of organs and tissue for purposes beyond diagnosis and treatment, although further statutory consent exemptions do exist in certain circumstances, notably use of anonymised tissue from the living for research ethics committee (REC) approved research projects[6]. The value of biobanks, in supporting broad, long-term research purposes, means that the model of the consent process needs to be considered in order to ensure that it is valid and appropriate. A number of different consent frameworks which address consent scope and process have been proposed as a result[5]. However, there is continued debate as to which is the most appropriate in various situations[4,7,8].

Both the Human Tissue Authority[9] and National Research Ethics Service[10] recommend generic consent (Table 1), a view that has also been endorsed by UK research funders[11] and the Nuffield Council on Bioethics[12]. One commonly cited criticism of generic consent is that it is not sufficiently 'informed' as future research uses are not known at the time of donation[13]. Empirical research examining public and patient preferences has highlighted that there is no clear consensus on the issue, with

specific consent being identified as the most favoured form of consent in some studies[14,15], and generic consent in others[16-18].

Table 1: Approaches to consent of biosamples

| <b>Initial consent methods</b>                |                                                                                                                                                                                                                                                                    |
|-----------------------------------------------|--------------------------------------------------------------------------------------------------------------------------------------------------------------------------------------------------------------------------------------------------------------------|
| Opt-in consent                                | The storage and use of biosamples for research on the basis that the donor has actively agreed to do so.                                                                                                                                                           |
| Opt-out consent                               | The storage and use of samples for research on the basis that the donor has not objected, after previously being given the opportunity to do so.                                                                                                                   |
| <b>Opt-in consent methods</b>                 |                                                                                                                                                                                                                                                                    |
| Consent once for life                         | Consent is provided once for life for use of any residual samples for research with the option of withdrawing permission at a later stage if the donor wishes to do so.                                                                                            |
| Consent at certain points                     | Consent is provided at certain points for use of residual biosamples for research, e.g. every 10 years or at the beginning of a particular episode of care.                                                                                                        |
| Consent every time                            | Consent is requested every time residual biosamples may become available for use in research.                                                                                                                                                                      |
| <b>Consent for research use of biosamples</b> |                                                                                                                                                                                                                                                                    |
| Generic consent                               | Consent to the use of donated samples for a range of unknown uses, on the basis of general information about those possible uses and about the governance arrangements in place.                                                                                   |
| Tiered consent                                | A more restricted form of consent for use of samples, where the donor is invited to agree to the use of their samples in unknown projects, but given the option of specifying particular categories of research that they wish to exclude e.g. embryonic research. |
| Specific consent –once only                   | Consent to the use of donated samples for a specified study only, on the basis of information provided about that study. Any residual sample will be discarded at the end of that study.                                                                           |
| Specific consent – for every new study        | Consent to the use of donated samples for a specified study, on the basis of information provided about that study. However, participants are re-contacted and asked to consider participating in every new study for which their biosamples are eligible.         |

The 2011 Nuffield Council report on donation of human material for medicine and research also recommends that research funders should work to increase public awareness of the key role of donated tissue in scientific and clinical research[12]. Public trust and confidence in the consent process is of paramount importance to maintain and

1  
2  
3 increase public support for donation and use of biosamples for biomedical research in the  
4 UK. For this reason, it is important to understand and inform public opinion to ensure  
5 consent models are aligned to public expectations and preferences. Whilst numerous  
6 international studies have been conducted which focus on consent preferences, research  
7 conducted in the UK has tended to focus on large scale population biobanks, such as UK  
8 Biobank[19] or Generation Scotland[20], which require ongoing contact with donors, or  
9 on the views of patients on the donation of residual biosamples[21]. The current study  
10 was conducted to broaden our understanding of the UK public's views on biosample  
11 donation for biomedical research. Moreover, the findings are intended to inform a  
12 biobanking policy for STRATUM (Strategic Tissue Repository Alliance Through Unified  
13 Methods), a Technology Strategy Board<sup>i</sup> and pharmaceutical industry-funded project  
14 seeking to address the problem of insufficient numbers of biosamples and associated  
15 clinical data of adequate quality to fully support biomedical research in the UK.  
16  
17  
18  
19  
20  
21

22  
23 The specific aims of this study were to 1) identify participants' views on the importance  
24 of consent when donating residual biosamples for medical research; 2) explore  
25 preferences for opt-in or opt-out approaches to consent; and 3) explore preferences for  
26 different consent models (Table 1). Public willingness to donate biosamples, views on  
27 donation of different biosample types, and conditions of their use are reported elsewhere  
28 (Public views on the donation and use of human biological samples in biomedical  
29 research – a mixed methods study, 2013, unpublished manuscript).  
30  
31  
32

### 33 **METHODS**

34  
35  
36 This was a mixed methods study comprising qualitative focus groups and a quantitative  
37 on-line survey. Ethical approval for the study was granted by the University of  
38 Manchester Research Ethics Committee in April 2012.  
39  
40  
41

#### 42 **Focus groups**

43  
44  
45 Twelve focus groups (including one pilot group) were conducted between May and July  
46 2012 in six different geographic locations across the UK. Participants were recruited  
47 face-to-face in the street by a market research company The Focus Group. Participants  
48 were purposively sampled; each group chosen to reflect a particular demographic (age,  
49 socio-economic group (SEG), ethnicity) in order to gather a wide spectrum of views and  
50 enable comparisons across groups. Two 'patient' groups were also included, comprising  
51 people who had had an operation in the past two years requiring an overnight hospital  
52 stay, and people who currently have, or have had, either a serious or chronic illness, or  
53  
54  
55  
56

57  
58 <sup>i</sup> under the Stratified Medicines Programme: Business Models Value Systems  
59  
60

1  
2  
3 disability. The latter group comprised people diagnosed with diabetes, cancer, heart  
4 disease, asthma and the genetic condition Marfan syndrome. A further group consisted  
5 of generally healthy people who had donated a biosample specifically for research  
6 purposes.  
7  
8

9  
10 Before agreeing to take part, potential participants were given a participant information  
11 sheet telling them about the study (see supplementary data file Appendix I). Those that  
12 were interested were screened through a questionnaire containing demographic  
13 questions to assess their suitability for a particular focus group. These were held in  
14 'neutral' locations such as hotel conference rooms or church halls and facilitated by an  
15 experienced facilitator (CL). Before each group discussion, participants were sent a short  
16 information leaflet about the use of biosamples in biomedical research to provide some  
17 background context for the discussion and to prompt them to think about the key issues  
18 (see supplementary data file Appendix II). This information was written by a core team  
19 of authors drawn from across academia and industry, including patient representation. It  
20 was reviewed by three members of the patient organisation Genetic Alliance UK as well  
21 as the science communication charity Sense about Science to ensure readability and  
22 non-bias. Before focus group discussions began, participants were asked to sign a  
23 consent form. Each participant received a small honorarium for taking part. Focus groups  
24 lasted 90 minutes and digital audio recordings were taken.  
25  
26  
27  
28  
29  
30  
31  
32

33  
34 A detailed discussion guide was developed to explore participant views and preferences  
35 towards consent scope and process (see supplementary data file Appendix III). The main  
36 focus related to the use of biosamples surplus to diagnostic requirements following  
37 surgery or a medical procedure. Questions were informed by other empirical studies of  
38 consent in biobanking[16,22], developed by the authors, and addressed the topics  
39 described above. To enhance understanding around the different consent models,  
40 participants were given a sheet presenting three different scenarios, each of which  
41 elaborated on one of the three consent models chosen for discussion (see supplementary  
42 data file Appendix IV). For each topic, discussion began by asking the group to consider  
43 the benefits and disadvantages of each particular approach. Once no new themes were  
44 emerging, each participant was asked to complete an accompanying anonymous  
45 questionnaire which asked them to select their preferred consent model. The discussion  
46 guide, scenario sheet and questionnaire were piloted at the first focus group which  
47 resulted in some minor amendments to wording.  
48  
49  
50  
51  
52  
53

54  
55 Recordings were fully transcribed and transcriptions checked. The software package  
56 Nvivo version 9 (QSR International, Pty Ltd) was used to help organise the data for  
57 analysis. This comprised grouping responses to questions into broad thematic categories  
58  
59  
60



1  
2  
3 which were then refined through sub-codes. Coding was conducted by CL and verified by  
4 a second researcher to ensure inter-rater reliability. Any discrepancies were discussed  
5 between the two researchers until consensus was reached.  
6  
7

## 8 **Survey**

9  
10 Once data analysis had been conducted on the focus group transcripts, the findings were  
11 used to inform development of a quantitative survey which was used to canvas public  
12 opinion on the issues of interest across a representative sample of the UK population  
13 (see supplementary data file Appendix V). The survey was carried out by the market  
14 research company Research Now using their online panel community of UK residents. A  
15 stratified sampling method was used: quotas were set on sex, age, geographical  
16 location, SEG and ethnicity, in line with data provided by the Office of National Statistics  
17 (ONS) to ensure the sample was as representative of the UK population as possible.  
18 Within each category, a random sample was selected from the Research Now database  
19 containing 451,185 active respondents. We aimed to recruit 1,000 responders in total. In  
20 order to reduce any on-line bias in our sample, 100 face-to-face interviews with non-  
21 internet users were conducted. An additional 'boost' sample of 100 people (not included  
22 in the main sample analysis) was also conducted with people from three minority ethnic  
23 groups ('Black', 'Chinese', 'S. Asian') so that we could conduct sub-group analysis  
24 between the groups.  
25  
26  
27  
28  
29  
30  
31  
32

33 The survey questions were developed by the authors and piloted with 60 members of  
34 Research Now's online panel community who were from low SEG's. Members of the pilot  
35 group were then invited to take part in a subsequent telephone interview asking about  
36 the survey. Interviews were conducted with 25 pilot survey responders. Questions  
37 focused on question clarity, survey length and whether responders felt the survey to be  
38 neutral. Some minor amendments to wording were made in light of the responses. The  
39 main survey was then conducted in September 2012. Surveys recorded online took, on  
40 average, 17 minutes to complete.  
41  
42  
43  
44

45 Survey data were organised and analysed using SPSS statistical software version 20  
46 (Chicago, IL: SPSS Inc; 2011). Initial univariate descriptive statistics were obtained for  
47 the entire study. Pearson Chi-square was used to examine demographic factors  
48 associated with willingness to donate and preference for different consent models. Those  
49 associations that were found to be significant ( $p \leq 0.05$ ) were then entered into a multiple  
50 logistic regression to explore the predictivity of these variables. Before running the  
51 model, we tested for multicollinearity among the independent variables. No  
52 multicollinearity issues were found.  
53  
54  
55  
56  
57  
58  
59  
60

## RESULTS

### Study populations

Participant characteristics are detailed in Table 2.

Table 2: Participant characteristics

| Characteristic              | Focus group<br>N=81 | Survey<br>N=1110 |
|-----------------------------|---------------------|------------------|
| <b>Gender</b>               |                     |                  |
| Male                        | 33; 41%             | 504; 45%         |
| Female                      | 48; 59%             | 606; 55%         |
| <b>Age</b>                  |                     |                  |
| 18-24                       | 13; 16%             | 135; 12%         |
| 25-34                       | 18; 22%             | 184; 17%         |
| 35-44                       | 19; 23%             | 198; 18%         |
| 45-54                       | 10; 12%             | 184; 17%         |
| 55-64                       | 16; 20%             | 176; 16%         |
| 65+                         | 5; 6%               | 233; 21%         |
| <b>Socio-economic group</b> |                     |                  |
| A                           | 9; 11%              | 41; 4%           |
| B                           | 22; 27%             | 215; 19%         |
| C1                          | 24; 30%             | 311; 28%         |
| C2                          | 14; 17%             | 233; 21%         |
| D                           | 6; 7%               | 145; 13%         |
| E                           | 6; 7%               | 165; 15%         |
| <b>Region</b>               |                     |                  |
| East of England             | 7; 7%               | 92; 8%           |
| East Midlands               | -                   | 57; 5%           |
| London                      | 18; 22%             | 213; 19%         |
| North East                  | -                   | 40; 4%           |
| North West                  | -                   | 121; 11%         |
| Northern Ireland            | -                   | 30; 3%           |
| Scotland                    | 14; 17%             | 76; 7%           |
| South East                  | 14; 17%             | 165; 15%         |
| South West                  | -                   | 81; 7%           |
| Wales                       | -                   | 51; 5%           |
| West Midlands               | 14; 17%             | 94; 8%           |
| Yorkshire/Humberlands       | 14; 17%             | 90; 8%           |
| <b>Ethnicity</b>            |                     |                  |
| White or White British      | 54; 67%             | 1057; 95%        |
| Mixed race                  | 1; 1%               | 7; 1%            |
| Asian or Asian British      | 10; 12%             | 18; 2%           |
| Black or Black British      | 9; 11%              | 19; 2%           |
| Chinese or Chinese British  | 7; 9%               | 2; 0%            |
| Other ethnic group          | 0; 0%               | 4; 0%            |
| Prefer not to say           | 0; 0%               | 3; 0%            |
| <b>Religion</b>             |                     |                  |
| Christianity                |                     | 677; 61%         |
| Islam                       |                     | 13; 1%           |
| Hinduism                    |                     | 6; 1%            |
| Sikhism                     |                     | 0; 0%            |
| Judaism                     |                     | 6; 1%            |
| Buddhism                    |                     | 11; 1%           |
| Other religion              |                     | 15; 1%           |

|                                                                                 |         |          |
|---------------------------------------------------------------------------------|---------|----------|
| No religion                                                                     |         | 370; 33% |
| Prefer not to say                                                               |         | 12; 1%   |
| <b>Religiosity</b>                                                              |         |          |
| Not at all religious                                                            |         | 234; 32% |
| Moderately religious                                                            |         | 422; 58% |
| Very religious                                                                  |         | 64; 9%   |
| Prefer not to say                                                               |         | 8; 1%    |
| <b>Education</b>                                                                |         |          |
| No formal qualification                                                         | 15; 19% | 70; 6%   |
| GCSE, O level, Scottish Standard Grade or equivalent                            | 19; 23% | 264; 24% |
| GCE, A-level, Scottish Higher or similar                                        | 17; 21% | 214; 19% |
| Vocational (BTEC/NVQ/Diploma)                                                   | -       | 230; 21% |
| Degree level or above                                                           | 30; 37% | 317; 29% |
| Prefer not to say                                                               | -       | 15; 1%   |
| <b>Self reported knowledge of medical research process</b>                      |         |          |
| No knowledge                                                                    |         | 463; 42% |
| Some knowledge                                                                  |         | 603; 54% |
| Good knowledge                                                                  |         | 44; 4%   |
| <b>Have you been affected by a disability or illness?</b>                       |         |          |
| Yes                                                                             |         | 399; 36% |
| No                                                                              |         | 711; 64% |
| <b>Has a close family member been affected by a disability or illness?</b>      |         |          |
| Yes                                                                             |         | 767; 69% |
| No                                                                              |         | 343; 31% |
| <b>Have you had blood or tissue removed during a medical procedure?</b>         |         |          |
| Yes                                                                             |         | 446; 40% |
| No                                                                              |         | 553; 50% |
| Don't know                                                                      |         | 111; 10% |
| <b>Have you ever been asked to donate blood or tissue for medical research?</b> |         |          |
| Yes                                                                             |         | 182; 16% |
| No                                                                              |         | 904; 81% |
| Don't know                                                                      |         | 24; 2%   |
| <b>If so, did you agree to donate?</b>                                          |         |          |
| Yes                                                                             |         | 155; 85% |
| No                                                                              |         | 23; 13%  |
| Don't know                                                                      |         | 4; 2%    |

Note: percentages may not add up to 100 due to rounding.

#### Focus groups

One hundred and eighty-two members of the public who were approached were eligible to participate (i.e. they fitted the criteria for a particular focus group) and 81 people agreed to participate (45% participation rate; 48 women, 33 men).

#### Survey

1  
2  
3 Four thousand six hundred and seven people were invited to take part in the survey;  
4 2014 did not respond, 860 began completing the survey but did not finish, 102 did not  
5 qualify to continue (e.g. they were under 18 years old), 521 qualified for the survey but  
6 the quota was full and 1110 completed the questionnaire (28% response rate excluding  
7 those who did not qualify and where the quota was full). This response rate is  
8 comparable to similar studies on this topic[16]. Our participant quotas closely, though  
9 not exactly, matched our targets based on the UK population data as provided by the  
10 ONS. For this reason we carried out both weighted and un-weighted analyses. There  
11 was no difference in the conclusions we reached by either method. In this paper we  
12 present the un-weighted results (weighted results can be found at supplementary data  
13 file Appendix VI).

### 20 **Importance of asking for consent**

21  
22 The majority of survey and focus group participants believed that obtaining consent for  
23 the use of residual biosamples was either extremely important (55%) or important  
24 (25%). Only 4% selected 'not at all important'. Reasons as to why consent was  
25 important, as cited by focus group participants, included that it was "polite", "respectful"  
26 and "morally correct" to ask permission; that it enabled people to feel they had made a  
27 contribution and an active choice; that it provided control, in particular for those people  
28 that might not want their biosamples to be used, for example for religious reasons; that  
29 taking without asking was akin to theft; and that it was important in order to maintain  
30 trust between patients and doctors.

31  
32 *"It then doesn't allow them to take liberties or advantage of the fact that you're out cold*  
33 *having an operation and someone says 'Oh we need a bit of that'."* Male, patient – had  
34 operation in past 2 years.

35  
36 A small minority did not feel that consent was important, the main reasons being that  
37 they did not want the tissue back, that once it was removed it no longer 'belonged to  
38 them', and that the tissue would just go to waste otherwise.

39  
40 Survey participants were asked what would be their preferred method of consenting to  
41 donate leftover biosamples for research use. The majority (65%) wanted to do so face-  
42 to-face with a health professional; 15% wanted to complete a form and return it by post.

### 51 **Preference for 'opt-in' or 'opt-out' consent**

52  
53 Participants were asked whether they preferred an opt-in or opt-out model of consent for  
54 donating residual biosamples. The results of the survey showed that opt-in consent was  
55 preferred by over half of the participants (55%), 28% preferred opt-out, 14% had no  
56  
57  
58  
59  
60

preference and 4% selected 'don't know'. Participants who were significantly more likely to prefer opt-in consent were: from a low SEG (E) (79.8% vs. 64.1%,  $X^2=11.13(1)$ ,  $p=0.001$ ); over 65 years (75.1% vs. 64%,  $X^2=7.68(1)$ ,  $p=0.006$ ); had a religious affiliation (68.8% vs. 61.2%,  $X^2=4.84(1)$ ,  $p=0.028$ ); and had an education level of GCSE or lower (71.1% vs. 63.9%,  $X^2=3.89(1)$ ,  $p=0.048$ ). The strongest significant predictor for preferring opt-in consent was being from a low SEG (E) (OR=2.22, 95% CI 1.41-3.57,  $p=0.001$ ) followed by having a religious affiliation (OR=1.36, 95% CI 1.01-1.81,  $p=0.04$ ) (Table 3).

Table 3: Multiple logistic regression of participant preferences for consent models

| Participant characteristic            | Coefficient | 95% CI     | Odds ratio | p value |
|---------------------------------------|-------------|------------|------------|---------|
| Preference for opt-in consent         |             |            |            |         |
| Socio-economic group                  | 0.806       | 1.41, 3.57 | 2.22       | 0.001   |
| Religion                              | 0.304       | 1.01, 1.81 | 1.36       | 0.04    |
| Preference for consent every time     |             |            |            |         |
| Religion                              | 0.72        | 1.05, 4.00 | 2.04       | 0.036   |
| Age                                   | 0.47        | 1.07, 2.41 | 1.60       | 0.023   |
| Preference for specific consent       |             |            |            |         |
| Opt-in                                | 1.52        | 3.30, 6.35 | 4.58       | <0.001  |
| Ethnicity                             | 1.08        | 1.23, 7.14 | 2.94       | 0.015   |
| Preference for generic consent        |             |            |            |         |
| Opt-out                               | 1.52        | 3.13, 6.67 | 4.55       | <0.001  |
| Religion                              | 0.04        | 1.08, 2.72 | 1.56       | 0.021   |
| Knowledge of medical research process | 0.44        | 1.06, 2.28 | 1.56       | 0.024   |

Demographic items were excluded from this table if none was statistically significant. All variables were entered into the models as categorical variables.

CI: Confidence Interval.

Focus group participants preferred opt-out consent ( $n=46$ ; 57%) over opt-in consent ( $n=29$ ; 36%), with 6 participants (7%) unsure, after in-depth discussion around the benefits and disadvantages of each approach. The main benefit of opt-out consent cited by participants was that more biosamples would be available and consequently spur research. Other reasons included: that it would be less costly administratively; that it maximised the value of left over biosamples; that patients wouldn't have to consider it every time they were having an operation or blood test; that those that did not want to donate still had the opportunity to opt-out; and that it would 'normalise' donating leftover biosamples which would be a positive step.

*"It would an incentive for society if everyone knew that this is what happens routinely, but you can choose not to be involved. It would be more like 'that's normal'."* Male, aged 18-24 group

Those that preferred the opt-in approach cited the following reasons as to why: an active choice was preferable to a passive choice; it enabled people to have more control over

1  
2  
3 their biosamples; it was truly 'informed consent' in the context of donating surplus  
4 samples for research (rather than as part of a clinical trial; clinical trials were outside the  
5 scope of the study) and hence more ethically acceptable; it enabled people to feel that  
6 they were making a positive contribution and would prevent the problem of vulnerable  
7 groups not being aware they were automatically 'opted-in'.  
8  
9

10  
11 *"There are going to be members of the public who are not going to always be able to*  
12 *consider rationally themselves what it actually means."* Female, healthy volunteer  
13

14  
15  
16 Whist the majority of focus group participants overall preferred opt-out consent, the  
17 results were different for the three minority ethnic groups ("Black", "S. Asian",  
18 "Chinese"), where opt-in consent was favoured by the majority.  
19

### 20 21 **Consent once for life or consent every time**

22  
23 The most prevalent system in current use for donating new biosamples that are surplus  
24 to clinical requirements in the UK is the opt-in approach, with potential donors being  
25 asked for consent every time a procedure is performed that may result in a biosample  
26 becoming available for research. (The law allows for the use of diagnostic archives for  
27 research without consent as long as certain criteria are met). Participants were therefore  
28 asked to consider variations on this model and state whether they preferred: (1) consent  
29 once for life, covering all subsequent biosamples, until or unless the donor decides to  
30 withdraw consent; (2) consent every time samples surplus to diagnostic requirements  
31 may become available, or (3) consent at certain points in life. Consent every time (43%)  
32 was preferred by the majority of survey participants, followed by consent at certain  
33 points (27%) and consent once for life, e.g. at aged 18, (21%). Seven percent had no  
34 preference and 2% didn't know. Groups who were significantly more likely to prefer  
35 consent every time compared to consent once for life were: under 55 years (70.3% vs.  
36 60.9%;  $X^2=5.88(1)$ ,  $p=0.015$ ); had no knowledge of the research process (72.3% vs.  
37 63.4%;  $X^2=5.77(1)$ ,  $p=0.016$ ); or were either not at all or moderately religious (70.2%  
38 vs. 51.3%;  $X^2=5.1(1)$ ,  $p=0.024$ ). When entered into the regression analysis, the  
39 strongest significant predictor for preferring consent every time was being not at all or  
40 moderately religious (OR=2.04; 95% CI 1.05-4.00,  $p=0.036$ ) followed by being under  
41 55 years (OR=1.60; 95% CI 1.07-2.41,  $p=0.023$ ) (Table 3).  
42  
43  
44  
45  
46  
47  
48  
49  
50

51  
52 Unlike survey responders, focus group participants favoured consent once for life ( $n=35$ ;  
53 43%) followed by consent every time samples surplus to diagnostic requirements may  
54 become available ( $n=27$ ; 33%) and consent at certain points ( $n=16$ ; 20%) with three  
55 choosing don't know (4%). Like opt-out consent, consent once for life was seen to be  
56 better as it was "quicker" and "easier" administratively and prevented researchers from  
57  
58  
59  
60

1  
2  
3 "losing out". Consent provided most control for participants as you would "know the  
4 specific purpose of it", particularly if the sample was considered to be sensitive e.g.  
5 eggs; allowed "no room for error"; and enabled people to change their mind easily.  
6  
7

8 *"You may feel differently [depending on] what tissue is being donated and for what*  
9 *purpose the research is being carried out."* Female, aged 18-24 group  
10

11  
12 Some participants had concerns about how consent preferences (e.g. what types of  
13 research they were willing to donate a biosample for), would follow them across the  
14 healthcare system if a 'consent once for life' model was adopted. Consent at certain  
15 points was seen by some as a good middle ground as patients would still have some  
16 control, but would not have to go through the consent process every time they had a  
17 medical procedure. Examples of consent at certain points included every "five or ten  
18 years", or at the beginning of particular episodes of care such as pregnancy or cancer  
19 treatment.  
20  
21  
22  
23

#### 24 **Models of consent for research use of biosamples**

25  
26  
27 Survey participants were presented with four consent models (Table 1), and asked  
28 whether they would consider consenting residual biosamples to each of them, providing  
29 the research had been approved by a research ethics committee (described as a  
30 committee usually made up of doctors, scientist, patients and the general public which  
31 ensure any research allowed to be done is for the benefit of patients). Eighty percent  
32 would agree to specific consent – once only; 77% would consent to specific consent – for  
33 every new study; 71% would agree to tiered consent; and 67% of participants would  
34 agree to generic consent. When asked which model they preferred, specific consent - for  
35 every new study, was the first choice amongst those who had a preference (30% of  
36 participants overall), followed by generic consent and specific consent- once only, jointly  
37 second (both 18%), and lastly tiered consent (14%). Sixteen percent had no preference  
38 and 6% didn't know.  
39  
40  
41  
42  
43  
44

45  
46 After collapsing the two specific consent models together (specific consent - for every  
47 new study and specific consent – once only), those participants who preferred specific  
48 consent were significantly more likely to: have a religious affiliation (63.9% vs. 48.9%,  
49  $X^2=16.88(1)$ ;  $p<0.001$ ); live in the North East or Scotland (60.9% vs. 42.7%,  
50  $X^2=10.23(1)$ ,  $p=0.001$ ); be over 65 years (67.1% vs. 57.1%,  $X^2=5.31(1)$ ,  $p=0.021$ );  
51 and be of a non-'White' ethnicity (68.9% vs. 58%,  $X^2=4.17(1)$ ,  $p=0.041$ ). Using the  
52 boost sample we found that 'Black' participants were significantly more likely to prefer  
53 specific consent models compared with 'White' participants (75.6% vs. 58%,  
54  $X^2=4.31(1)$ ,  $p=0.038$ ). Those people who preferred opt-in consent were also more likely  
55  
56  
57  
58  
59  
60



1  
2  
3 to prefer specific consent models (71.1% vs. 35.3%,  $X^2=91.72(1)$ ,  $p<0.001$ ). The  
4 strongest significant predictor for preferring specific consent was preferring opt-in  
5 consent (OR=4.58, 95% CI 3.30-6.35,  $p<0.001$ ) followed by being of non-'White'  
6 ethnicity (OR=2.94, 95% CI 1.23-7.14,  $p=0.015$ ) (Table 3).  
7  
8

9  
10 We also looked at who was most likely to prefer generic consent, the least restrictive of  
11 the proposed consent models. Those that preferred generic consent were significantly  
12 more likely to: have no religious affiliation (51.1% vs. 36.1%,  $X^2=15.97(1)$ ,  $p<0.001$ );  
13 have some or good knowledge of the medical research process (26.1% vs. 18.3%,  
14  $X^2=6.79(1)$ ,  $p=0.009$ ); be male (26.8% vs. 19.9%,  $X^2=5.40(1)$ ,  $p=0.02$ ); and be from a  
15 higher SEG group (A-D) (24.3% vs. 15.1%,  $X^2=4.66(1)$ ,  $p=0.031$ ). They were also  
16 significantly more likely to prefer opt-out consent (64.7% vs. 28.9%,  $X^2=91.72(1)$ ,  
17  $p<0.001$ ). The strongest significant predictor for preferring generic consent was  
18 preferring opt-out consent (OR=4.55, 95% CI 3.13-6.67,  $p<0.001$ ) followed by having  
19 no religious affiliation (OR=1.56, 95% CI 1.08-2.72,  $p=0.021$ ) and some or good  
20 knowledge of the medical research process (OR=1.56, 95% CI 1.06-2.28,  $p=0.024$ )  
21 (Table 3).  
22  
23  
24  
25  
26  
27

28 Focus group preferences differed from those of survey responders with generic consent  
29 being equally popular (n=36; 44% and n=35; 43% respectively). Specific consent –  
30 once only, was least popular (n=6; 7%) (this was the only specific consent model given  
31 to participants). Four participants (5%) didn't know. Generic consent was valued as it  
32 provides most "flexibility for researchers"; reduces the likelihood residual biosamples will  
33 go to waste; is more straightforward to put in place; is "simpler to understand"; and  
34 enables biosamples to be used for more than "one specific thing".  
35  
36  
37  
38

39 *"It's better not to restrict the possible use of the sample because by restricting it you're*  
40 *increasing the chance that it'll go to waste. You want the highest probability that*  
41 *something good will come from it."* Male, patient – affected by a condition  
42  
43

44 Tiered consent was also valued because it provided more control over donated  
45 biosamples than generic consent, allowing people to opt-out of certain types of research,  
46 and therefore provided "clarity and peace of mind". All but one participant in the 'Black'  
47 focus group and all participants who had donated biosamples as healthy volunteers  
48 preferred tiered consent. Whilst specific consent was seen to provide the most control  
49 and enabled participants to have "some understanding of what it might be used for",  
50 concerns raised were that it "can't be used for anything else", "could be wasted" and  
51 would require a time-consuming explanation from health professionals.  
52  
53  
54  
55  
56  
57  
58  
59  
60



1  
2  
3 In both the survey and focus groups, the donation of potentially sensitive biosamples  
4 produced a preference for specific consent. In the survey, a quarter (25%) preferred  
5 specific consent – for every new study, 22% preferred specific consent – once only, 12%  
6 preferred generic consent and 9% preferred tiered consent. Nineteen percent had no  
7 preference and 13% didn't know. When discussing donation of eggs, one woman  
8 commented:  
9

10  
11  
12 *"People could reproduce a child or whatever and it's about the personal-ness of what's*  
13 *been taken from you. So if it's a bit of blood, yeah take it, I mean you just cut yourself*  
14 *and blood is gone, but if it's something that's quite personal you only have every now*  
15 *and again, that needs to be guarded."* Female, 'Black' ethnicity group  
16  
17  
18

19  
20 We asked survey participants whether they would like to be kept up-to-date with  
21 research going on at a particular hospital or biobank to which they had donated a  
22 biosample. Eighty-five percent said they would be interested; the most popular methods  
23 to receive updates were via a website (27%), email (27%) or letter (22%).  
24  
25  
26

## 27 **DISCUSSION**

28  
29 This study contributes further to our understanding of the UK public's views and  
30 preferences towards consent for the use of biosamples in medical research. In summary,  
31 we have found that: 1) the consenting process was perceived as important in order to  
32 maintain trust between patients and health professionals and respect patient autonomy;  
33 2) survey participants exhibited a desire to retain active choice and control when  
34 donating biosamples and over the uses to which their biosamples might be put, and 3)  
35 these results differ from those reported during focus group discussions, where  
36 preference was for less restrictive consent models that are likely to increase availability  
37 of biosamples. These differences might be accounted for by the fact that focus group  
38 participants were given more background information about the use of residual  
39 biosamples in research and had time to consider the benefits and disadvantages of the  
40 different approaches. These interventions may have allayed any anxieties participants  
41 had about relinquishing control of their biosamples and seem to have encouraged  
42 participants to choose approaches that maximised biosample access to researchers,  
43 highlighting the importance and potential impact of education on influencing public  
44 perception in this area.  
45  
46  
47  
48  
49  
50  
51  
52

53  
54 The preference for opt-in consent identified in the survey is consistent with the results of  
55 other studies in this area[3,15,16]. One reason for this preference may be that it  
56 matches the current system for organ donation for transplant in the UK. Nevertheless,  
57  
58  
59  
60

1  
2  
3 the sizeable number of survey responders who preferred opt-out consent (27%) coupled  
4 with the preference for opt-out amongst focus group participants (57%) does suggest  
5 that there may be broader support than previously believed for this approach. This point  
6 is also supported by the finding that fewer than half of survey participants wanted to be  
7 consented every time a sample was taken and nearly 30% preferred consent at certain  
8 points. Alternate, more streamlined approaches to consenting should therefore be  
9 considered and evaluated. Interestingly, our results showed that preference for opt-out  
10 consent was associated with being younger (under 65 years), from a higher SEG and a  
11 higher education level. These demographic groups may be more trusting of medical  
12 institutions to use residual biosamples appropriately, or perhaps feel empowered to be  
13 able to opt-out if so desired, for example, online. Similar findings have been reported in  
14 relation to organ donation; a study by Gimbel et al. found an association between  
15 cadaveric donation rate and percentage of the population enrolled in third-tier  
16 education[23]. Internet access has also been found to correlate with increased organ  
17 donation[24].

25  
26 Concerning consent models for research use of biosamples, the majority of people were  
27 willing to donate biosamples via the least restrictive model, generic consent.  
28 Nevertheless, our survey findings suggest that willingness to donate increased where  
29 greater choice and control over research participation is retained, although the difference  
30 between those who were willing to agree to generic compared to specific was only 13%.  
31 Similarly, when survey responders were asked about their preferred approach, their  
32 preference was also for specific consent for every new study that might be conducted  
33 using their biosample. This may indicate a general interest in how samples are being  
34 used. This notion is supported by the high number of people who wanted ongoing  
35 contact about the research leading from their donation. Moreover, they may have not  
36 considered the practicalities of being asked to consent every time their sample is used,  
37 and the high level of recontact they might receive from research teams. Nevertheless, it  
38 is important to take note of the fact that more tailored forms of consent represent an  
39 attractive approach to many people. While specific consent may be practical for  
40 individual research projects, this restriction would make biobanking challenging, as  
41 biobanks exist to facilitate access to samples for a wide variety of approved research  
42 projects without the need for additional consent. It may be that as more sophisticated  
43 biosample tracking and management systems are adopted, resources could become  
44 available to support more interactive forms of consent, and more biobanks could offer  
45 tiered consent, for example. Further public dialogue and information about the use of the  
46 samples may also provide the same assurances for people that arise from specific  
47 consent, as highlighted by the preference for less restrictive consent models amongst  
48 focus group participants.

1  
2  
3 Evidence from other empirical studies looking at preferences for consent models is  
4 mixed. UK studies focusing on donations purely for research by 'healthy volunteers' to  
5 biobanks (i.e. not donating residual biosamples) have identified a preference for specific  
6 consent,[19,25] as did a study conducted in the USA that also focused on healthy  
7 volunteers[15]. Other empirical work conducted in the USA and Sweden has shown that  
8 public preference is for generic consent[3,16,18]. These findings highlight the divergence  
9 of opinion on this issue, in particular in different contexts and with different information  
10 provision, although the difficulty of comparing across studies with different  
11 methodologies and backgrounds must also be taken into account. Notably, where  
12 participants had some or good knowledge of the research process and where there was  
13 in-depth discussion (i.e. during focus groups), participants were more likely to prefer  
14 generic consent, a finding that has also been identified elsewhere in the literature[26]  
15 and supports the need for information and education if increasing the acceptability of  
16 generic consent is deemed desirable. Preference for specific consent was also found to  
17 be associated with being over 65 years and from a non-'White' ethnicity, findings which  
18 resonate with other studies[3,27,28]. Consent documentation and written information  
19 targeted specifically at these particular groups may also help alleviate any specific  
20 concerns these groups may have.  
21  
22

23  
24  
25  
26  
27  
28  
29  
30 This research into current public attitudes regarding biosample donation in the UK  
31 provides valuable guidance for biobanking governance. Whilst generic consent is the  
32 model largely endorsed by regulators and funders in the UK[9,11], the evidence from  
33 this study suggests that there is a need to address the potential concerns that some  
34 people may have about the minimal information and lack of control provided through  
35 this model. Education and opportunity for discussion may be one way to allay concerns,  
36 as demonstrated through focus groups. Keeping donors informed of current research  
37 taking place at the hospital or research institutions to which they donated also appears  
38 to be desirable and is likely to be both motivating and promote public trust and  
39 confidence in the research process, a finding reported elsewhere[29]. The opportunity  
40 for face-to-face discussion with an appropriately trained healthcare professional at the  
41 time of donation may also allay any potential concerns, and is indeed the approach  
42 usually taken in the UK at present. This approach has been found to yield high  
43 acceptance rates amongst patients of well over 90%[30-32].  
44  
45  
46  
47  
48  
49  
50

### 51 **Strengths and Limitations**

52  
53  
54 This was a mixed methods study to explore public views and preferences towards  
55 consent for biosample donation. Integrating quantitative and qualitative approaches is  
56 valuable in exploratory research as it can strengthen the inferences made through  
57  
58  
59  
60

1  
2  
3 triangulation and allow for a more nuanced understanding of the topic[33]. This study  
4 presented participants with a series of hypothetical questions about their preferences  
5 and willingness to donate residual biosamples for medical research. By presenting  
6 questions as 'real life' scenarios, we hoped to make the questions as realistic as possible.  
7 However, as with any hypothetical scenario, the findings may not necessarily correlate  
8 with actual behaviour. The questions for both the focus groups and the survey were  
9 piloted to ensure they were clear and understandable and were not biased towards any  
10 particular viewpoint. Nevertheless, many of the issues covered were complex,  
11 particularly around the meaning of the different consent models which may have  
12 contributed to the dropout rate. Participants who did complete the survey may have  
13 done so because of strong feelings about the issues raised and this may have skewed  
14 the results; however, every effort was made to ensure that the results were as  
15 representative of the UK population as possible. The focus groups and survey were  
16 conducted in English and so the findings may not be representative of non-English  
17 speaking members of the general public. Future research might target these particular  
18 groups.

## 27 **CONCLUSION**

28  
29 There is a general willingness amongst the UK population to donate biosamples for  
30 medical research. Our research suggests that there is a preference amongst the UK  
31 public for more information on the uses and outcomes of research, and ongoing choice  
32 and control over donated biosamples. Our study also supports the premise that  
33 increased knowledge and opportunity for discussion is associated with acceptance of less  
34 restrictive consent models.  
35  
36  
37  
38  
39  
40

41 **Acknowledgements** We would like to thank Lisa Bennett, Sarah Dickson, Catherine  
42 Elliott, James Ironside and Chris Womack and for their helpful comments on this paper;  
43 Sarah Dickson, Jim Elliott and Neil Formstone for their contribution to the design of the  
44 study; and Samantha Reeve and Zheng Lei for help with data analysis.  
45  
46  
47

48 **Funding statement** This work was supported by a grant from the Technology Strategy  
49 Board through the Stratified Medicines Competition grant number 101021, direct  
50 financial contributions by AstraZeneca and resource in kind by AstraZeneca,  
51 GlaxoSmithKline and Lab 21.  
52  
53  
54

55 **Competing interests:** Lesley Stubbins is an employee of GlaxoSmithKline. Mark  
56 Robertson is an employee of AstraZeneca.  
57  
58  
59  
60

1  
2  
3 **Contributors:** J.C. conceived the study. All authors contributed to the study design. In  
4 addition to all the authors, Sarah Dickson, Jim Elliott and the late Neil Formstone also  
5 contributed towards the design of the study and development of the focus group and  
6 survey questions. C.L. facilitated the focus groups. Focus group recruitment was  
7 conducted by the company The Focus Group; the survey was conducted through the  
8 market research company Research Now. C.L. conducted data analysis and  
9 interpretation with the help of Samantha Reeve and Zheng Lei. The initial draft of the  
10 manuscript was prepared by C.L and then circulated repeatedly among the authors for  
11 critical revision. All authors approved the final manuscript.  
12  
13  
14  
15

16  
17 **Ethical approval** This study was approved by the Ethics Review Board of the University  
18 of Manchester, reference 11459.  
19

20  
21 **Data sharing statement** Transcripts from the focus groups and full results of the  
22 survey are available from CL at [celine@geneticalliance.org.uk](mailto:celine@geneticalliance.org.uk). Supplementary material is  
23 also available at [www.geneticalliance.org.uk/projects/stratum\\_docs.htm](http://www.geneticalliance.org.uk/projects/stratum_docs.htm)  
24  
25  
26  
27

## 28 REFERENCES

- 29  
30  
31 1. Oosterhuis JW, Coebergh JW, van Veen EB. Tumour banks: well-guarded treasures in  
32 the interest of patients. *Nature reviews. Cancer* 2003;**3**73-7.  
33  
34 2. Elger BS, Caplan AL. Consent and anonymization in research involving biobanks:  
35 differing terms and norms present serious barriers to an international framework.  
36 *EMBO reports* 2006;**7**661-6.  
37  
38 3. Murphy J, Scott JCGC, Kaufman D, et al. Public Perspectives on Informed Consent for  
39 Biobanking. *American Journal of Public Health* 2009;**99**2128-34.  
40  
41 4. Wendler D. One-time general consent for research on biological samples. *BMJ*  
42 2006;**332**544-7.  
43  
44 5. Allen J, McNamara B. Reconsidering the value of consent in biobank research.  
45 *Bioethics* 2011;**25**155-66.  
46  
47 6. Department of Health. The Human Tissue Act. 2004  
48  
49 [http://www.dh.gov.uk/prod\\_consum\\_dh/groups/dh\\_digitalassets/@dh/@en/docu](http://www.dh.gov.uk/prod_consum_dh/groups/dh_digitalassets/@dh/@en/documents/digitalasset/dh_4103686.pdf)  
50 [ments/digitalasset/dh\\_4103686.pdf](http://www.dh.gov.uk/prod_consum_dh/groups/dh_digitalassets/@dh/@en/documents/digitalasset/dh_4103686.pdf) Accessed 11 November 2011.  
51  
52  
53  
54  
55  
56  
57  
58  
59  
60

- 1  
2  
3 7. Hansson MG, Dillner J, Bartram CR, et al. Should donors be allowed to give broad  
4 consent to future biobank research? *Lancet Oncol* 2006;**7**266-9.
- 5  
6  
7 8. Hoeyer K. Donors perceptions of consent to and feedback from biobank research:  
8 Time to acknowledge diversity? *Public Health Genomics* 2010;**13**345-52.
- 9  
10  
11 9. Human Tissue Authority. Consent exemptions from the Human Tissue Act 2004  
12 <http://www.hta.gov.uk/licensingandinspections/consentexemptions.cfm> Accessed  
13 26 February 2013.
- 14  
15  
16 10. Integrated Research Application System. Guidance document for researchers.  
17 [https://www.myresearchproject.org.uk/Help/Help%20Documents/PdfDocuments/  
18 researchtissuebank.pdf](https://www.myresearchproject.org.uk/Help/Help%20Documents/PdfDocuments/researchtissuebank.pdf) Accessed 25 February 2013.
- 19  
20  
21 11. Medical Research Council (MRC) and National Cancer Research Institute (NCRI). UK  
22 Funders' Vision for Human Tissue Resources, September 2011.
- 23  
24  
25 12. Nuffield Council on Bioethics. Human bodies: donations for medicine and research,  
26 2011.
- 27  
28  
29 13. Petrini C. "Broad" consent, exceptions to consent and the question of using biological  
30 samples for research purposes different from the initial collection purpose. *Social  
31 Science and Medicine* 2010;**70**217-20.
- 32  
33  
34 14. Tupasela A, Sihvo S, Snell K, et al. Attitudes towards biomedical use of tissue sample  
35 collections, consent, and biobanks among Finns. *Scandinavian Journal of Public  
36 Health* 2010;**38**46-52.
- 37  
38  
39 15. Kaufman D, Bollinger J, Dvoskin R, et al. Preferences for opt-in and opt-out  
40 enrollment and consent models in biobank research: a national survey of  
41 Veterans Administration patients. *Genetics in medicine : official journal of the  
42 American College of Medical Genetics* 2012.
- 43  
44  
45 16. Simon CM, L'Heureux J, Murray JC, et al. Active choice but not too active: Public  
46 perspectives on biobank consent models. *Genetics in Medicine* 2011;**13**821-31.
- 47  
48  
49 17. Willison DJ, Swinton M, Schwartz L, et al. Alternatives to project-specific consent for  
50 access to personal information for health research: insights from a public  
51 dialogue. *BMC Med Ethics* 2008;**9**18.
- 52  
53  
54  
55  
56  
57  
58  
59  
60

- 1  
2  
3 18. Kettis-Lindblad Å, Ring L, Viberth E, et al. Perceptions of potential donors in the  
4  
5 Swedish public towards information and consent procedures in relation to use of  
6  
7 human tissue samples in biobanks: A population-based study. *Scandinavian*  
8  
9 *Journal of Public Health* 2007;**35**148-56.
- 10  
11 19. Shickle D, Hapgood R, Carlisle J, et al. Public attitudes to participating in UK  
12  
13 Biobank. A public consultation on issues relating to feedback, consent, withdrawal  
14  
15 and access: School of Health and Related research (SchARR). University of  
16  
17 Sheffield, 2003.
- 18  
19 20. Haddow G, Cunningham-Burley S, Murray L. Can the governance of a population  
20  
21 genetic data bank effect recruitment? Evidence from the public consultation of  
22  
23 Generation Scotland Public Underst Sci 2011117-29.
- 24  
25 21. Start RD, Brown W, Bryant RJ, et al. Ownership and uses of human tissue: Does the  
26  
27 Nuffield bioethics report accord with opinion of surgical inpatients? *BMJ*  
28  
29 1996;**313**1366-68.
- 30  
31 22. Ipsos MORI Social Research Institute. Human Tissue Authority General Public  
32  
33 Survey, 2010.
- 34  
35 23. Gimbel RW, Strosberg MA, Lehrman SE, et al. Presumed consent and other  
36  
37 predictors of cadaveric organ donation in Europe. *Prog Transplant* 2003;**13**17-23.
- 38  
39 24. Rithalia A, McDaid C, Suekarran S, et al. Impact of presumed consent for organ  
40  
41 donation on donation rates: a systematic review. *BMJ* 2009;**338**a3162.
- 42  
43 25. Gaskell G, Gottweis H, Starkbaum J, et al. Publics and biobanks: Pan-European  
44  
45 diversity and the challenge of responsible innovation. *Eur J Hum Genet* 2012.
- 46  
47 26. Gaskell G, Gottweis H. Biobanks need publicity. *Nature* 2011;**471**159-60.
- 48  
49 27. Nilstun T, Hermeren G. Human Tissue Samples and Ethics. *Medicine, Health Care*  
50  
51 *and Philosophy* 2006;**9**81-86.
- 52  
53 28. Ma Y, Kong X, Dai H, et al. Attitudes towards biosample donation in andrology  
54  
55 patients. *International journal of andrology* 2012;**35**170-5.  
56  
57  
58  
59  
60

- 1  
2  
3 29. Haddow G, Cunningham-Burley S, Bruce A, et al. Generation Scotland: consulting  
4  
5 publics and specialists at an early stage in a genetic database's development.  
6  
7 Critical Public Health 2008;**18**139-49.  
8
- 9 30. Jack AL, Womack C. Why surgical patients do not donate tissue for commercial  
10  
11 research: review of records. BMJ 2003;**327**262.  
12
- 13 31. Bryant RJ, Harrison RF, Start RD, et al. Ownership and uses of human tissue: what  
14  
15 are the opinions of surgical in-patients? Journal of clinical pathology 2008;**61**322-  
16  
17 26.  
18
- 19 32. Wheeler J, Agarwal M, Sugden J, et al. Experiences from the front-line routine  
20  
21 consenting of surplus surgically removed tissue: without investment by the  
22  
23 National Health Service fully informed consent for all is not available. J Clin Pathol  
24  
25 2007;**60**351-4.  
26
- 27 33. Teddlie C, Tashakkori A. *Foundations of Mixed Methods Research: Integrating*  
28  
29 *Quantitative and Qualitative Approaches in the Social and Behavioral Sciences.*  
30  
31 Thousand Oaks, California: Sage Publications, Inc., 2009.  
32  
33  
34  
35  
36  
37  
38  
39  
40  
41  
42  
43  
44  
45  
46  
47  
48  
49  
50  
51  
52  
53  
54  
55  
56  
57  
58  
59  
60



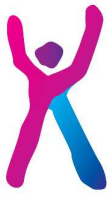

**Genetic Alliance UK**  
Supporting. Campaigning. Uniting.

MANCHESTER  
1824

The University  
of Manchester

## Appendix 1

### Attitudes Towards Donating Human Tissue Samples for Research Participant Information Sheet

We would like to invite you to take part in a research study to help us understand what people think about donating human biological samples, (such as blood, saliva, types of blood tissues such as lung tissue, liver tissue) or tissue (e.g. lung tissue, saliva), or post mortem tissue, for medical research. These samples could be left over from a surgical procedure or they may be donated specifically for research purposes. Currently, we know very little about what people think about this issue. Please take the time to read the following information to help you decide whether you would like to take part.

**Who will conduct this research?** The research is part of the STRATUM project, a project set up to try to increase the effectiveness of tissue sample provision in the UK. It is being conducted with the help of a national charity, Genetic Alliance UK that represents over 150 patient organisations. The Focus Group are a reputable research company helping us to recruit members of the public. This study has received ethics approval from Manchester University.

**What is the aim of this research?** The aim is to understand what people think about donating human tissue samples for medical research.

**Why have I been chosen?** As a member of the public, your views are important. Your views will help us understand people's opinions and ensure that the donation of biological samples for medical research is carried out in a way that reflects people's wishes.

**What would I be asked to do if I took part?** We are inviting you to attend a group discussion to discuss your opinions about donating tissue samples for medical research. Don't worry if you feel you don't know a lot about this topic because discussions will be led by a trained moderator. We have provided some basic information along with this sheet that gives you some background about the topic. There are no right or wrong views; everyone's opinions will be equally valid.

Page | 1

Genetic Alliance UK: Unit 4D, Leroy House, 436 Essex Road, London, N1 3QP  
020 7704 3141 [contactus@geneticalliance.org.uk](mailto:contactus@geneticalliance.org.uk) [www.geneticalliance.org.uk](http://www.geneticalliance.org.uk)

Charity registered in England and Wales (no. 1114195) and in Scotland (no. SC039299)  
For peer review only - <http://bmjopen.bmj.com/site/about/guidelines.xhtml>  
Company limited by guarantee, registration no: 05772999

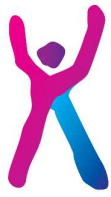

# Genetic Alliance UK

Supporting. Campaigning. Uniting.

**What happens to the data collected?** The information collected from these discussions will be used to write a report which will be used to influence National policy. The findings will also be used to publish academic papers in journals.

**How is confidentiality maintained?** Discussions will be digitally recorded so that we can get an accurate account of what was said. However, when these are typed up, all comments will be anonymous and your name will not appear anywhere on the document. The documents will be kept secure on an encrypted hard drive and backed up on an encrypted memory stick which will be kept in a locked office. These documents and the audio files will be kept for 5 years and then destroyed. This information will not be passed on to any other third party.

**What happens if I do not want to take part or if I change my mind?** It is up to you whether or not to take part. If you do decide to take part you will be asked to sign a consent form saying that you have agreed to take part and have the conversation recorded. If you decide to take part you are still free to withdraw at any time without giving a reason and without detriment to yourself.

**Will I be paid for taking part?** As a thank you for taking part you will be given £50 which will be given at the end of the discussion.

**What is the duration of the research?** There will be between 6-8 people in the group which will last approximately 1.5 hours.

**Where will the research be conducted?**

**What are the benefits from me taking part?** There is no direct benefit to yourself from taking part, but your views will help to shape future policy.

**Who will be running the group?** The person running the focus group is Celine Lewis, who is a researcher with Genetic Alliance UK. If you have any concerns or questions about taking part in this research before the group then please contact Celine on 0207 704 3141. If you have agreed to take part and then find nearer the time you are no longer able to make the group then please contact the person who recruited you directly so that you can be replaced.

**What if something goes wrong?** In the unlikely event that you want to make a complaint about the conduct of the research, or would like help or advice following the discussion, you can contact the head of the project, Julie Corfield:  
Email: [juliecorfield@areteva.com](mailto:juliecorfield@areteva.com)  
Tel: 0115 812 0008

Many thanks,

**Celine Lewis**

Page | 2

Genetic Alliance UK: Unit 4D, Leroy House, 436 Essex Road, London, N1 3QP  
020 7704 3141 [contactus@geneticalliance.org.uk](mailto:contactus@geneticalliance.org.uk) [www.geneticalliance.org.uk](http://www.geneticalliance.org.uk)

Charity registered in England and Wales (no. 1114195) and in Scotland (no. SC039299)  
For peer review only - <http://bmjopen.bmj.com/site/about/guidelines.xhtml>  
Company limited by guarantee, registration no: 05772999

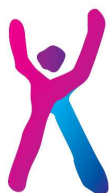

Genetic Alliance UK

Supporting. Campaigning. Uniting.

## Appendix II

# Donating biological samples for medical research

## Introduction

Medical research is necessary to improve our understanding of what keeps us healthy and how diseases start and progress. It also means scientists can develop new and improved treatments.

Body fluid (such as blood, saliva, urine) and human tissue (such as fat, cancer tumours or muscle) are often used in scientific and medical research. Types of research that need body fluid and human tissue include:

- Looking at how the body works to fight disease.
- Testing new treatments for conditions such as heart disease and diabetes.
- Developing tests for different types of cancer.
- Researching how certain types of cells could be used to treat conditions like Parkinson's disease, Alzheimer's disease and multiple sclerosis.

Many of the tests and treatments used today resulted from people donating body fluid and human tissue (often called 'samples') for research years ago.

## How are human samples collected?

There are a number of ways that human samples can be collected:

- Samples may be left over after surgery. Tissue may be removed during surgery so tests can be done on the tissue or to stop the diseased tissue spreading to other parts of the body. After any necessary tests have been done on the tissue, there may be some left over. This left over tissue may be destroyed or used for medical research.
- Samples may be left over from a medical test such as a blood test.
- Samples might be donated specifically for medical research.
- A person may give permission (known as 'consent' or 'authorisation') for a sample to be taken and used for research in the event of their death.
- A person's family may give permission for the person's organs, which would have been donated for transplant, to be used for research if they are not suitable for transplant or a suitable recipient is not available.

The collection and use of samples is tightly governed by law in the UK. The removal of samples from a person is always done with the donor's permission, and any research first has to be approved by a research ethics committee. This committee is usually made up of doctors, scientist, patients and the general public, and ensures any research allowed to be done is for the benefit of patients. In specific circumstances the law allows samples that have already been collected to be used for another purpose, as long as the donor cannot be identified and the use has been approved by an ethics committee.

## What is done with the sample once it is collected?

Samples may be collected by a researcher and used immediately, or they may be collected for research purposes and kept. This may be in a researcher's laboratory or it may be in a storage place specifically for samples, known as a biobank.



## Genetic Alliance UK

Supporting. Campaigning. Uniting.

The biobank keeps the samples so they can be used by scientists for research. In other words, biobanks are a little like libraries of samples, and only a research team can use them if they have the appropriate approval. A biobank has to follow regulations and have a licence, granted by the Human Tissue Authority (a UK Government organisation), to be able to store human tissue samples for research.

These systems ensure that any research respects the privacy of the people who donated the samples and that the research is of benefit to society. In many cases, it can be very important to have a patient's medical records along with their sample so that scientists can make sense of the results of their research. Any identifying information, such as names or addresses, is removed and not included with the sample.

### **How long is the biological sample kept?**

A sample may be used all at once. However, it is often the case that it won't all be used in one go. Therefore the sample may be stored and used over many years so that research can be done on it well into the future.

### **What are the benefits from donating biological samples to medical research?**

The person donating the sample is unlikely to benefit directly from the research, as it can take many years for the research on samples to produce new treatments or cures for diseases. Nevertheless, donors often see a benefit from knowing that they have personally helped medical research.

## **Genetic Alliance UK 2012**

### **The following information was used during the making of this leaflet:**

"Donating samples for research; Patient information" – Central England Haemato-Oncology Research Biobank

"Donating your tissue for research"- Human Tissue Authority

"Active choice but not too active: Public perspectives on biobank consent models" Simon et al. 2011; Genetics in Medicine

## Appendix III

## Focus Group – Discussion Guide

**Introduction (5 minutes)**

*Thank them for coming*

*Aim of discussion – hear people’s views, there are no right or wrong opinions, disagreement OK*

*Participation voluntary*

*Confidentiality – all info anonymous, personal details will not be passed on to any third party*

*Get permission for recording to be taped – no names or identifying features used when typed up*

*Guidelines – talk one at a time; am interested in everyone’s views so will try and give everyone equal ‘airtime’; no wrong answers – be honest and open.*

*Turn mobile phones off*

*Go round room. Ask everyone to say their name and one of their favourite foods.*

**Research (30 minutes)**

On the information sheet you’ve been given, there is some general information about donating samples for research. Has everybody had a chance to read this information? (if not give participants a few minutes to read document). So, to summarise....*give a brief overview of information on the document.*

1. So to start off, does anyone have any questions about anything I’ve said so far?

So I’d like us to think now about the different types of samples someone might donate to medical research. Human biological samples can mean a variety of different things including body fluid such as blood, saliva and sperm, and human tissue such as fat, cancer tumours or muscle or even whole organs.

2. Do you think there are some types of samples which are more sensitive to give than others? Which ones? Why?

There are also various different ways that samples can be collected. They might be

- left over from routine procedures such as surgery;
- left over after a medical test such as a blood test;
- donated specifically for medical research, for example a cheek swab or an extra blood sample;
- donated after a person’s death;
- a person’s organs e.g. heart or kidneys, which would have been donated for transplant, may be used for research if they are not suitable for transplant or a suitable recipient is not available. The relevant clinical data may also be included and reviewed after death.

3. I’d like us to go through each of these in turn and discuss whether you have concerns about any of these ways that samples might be collected and why. GO THROUGH AND PROBE EACH POINT SPECIFICALLY (AFTER GROUP DISCUSSION: ask participants to complete associated question on questionnaire)

4. Do you see donation of human samples for medical research and organ donation for transplant similarly or do you think they are different?

5. Thinking specifically about donating tissue or organs after one’s death, do you think if someone has indicated in writing that they are willing to donate these for research in the event of their death, their wishes can be overridden by their relatives?

Samples may be used for a variety of different types of research. This might include looking at how the body works to fight disease; testing new treatments for conditions such as heart disease and diabetes or developing ways of diagnosing earlier different types of cancer.

6. Are there any types of research you would not be happy for your sample to be used for? Why?

(AFTER GROUP DISCUSSION: ask participants to complete associated question on questionnaire)

There are many places where research is performed, such as universities, NHS, charities such as cancer research, government labs and pharmaceutical companies. These are all groups that do research & sometimes they collaborate with each other in order to make medical progress.

7. Do you have any concerns about any particular types of organisations using donated samples. Which if any, and why?

(AFTER GROUP DISCUSSION: ask participants to complete associated question on questionnaire)

8. What do you think about the organisations that conduct research on samples? Do you think they are generally doing a good thing for society? Do you have any concerns about what they do?

9. Institutions such as the government and ethics review committees make decisions about what research can and can't be done on human samples. Ethics review committees are usually made up of different experts such as of doctors, scientists, ethics experts and patients Do you generally trust these types of institutions to make decisions about what research can and can't be done using human tissue samples?

### Consent (40 minutes)

I'd like to now talk about getting permission, also known as consent, to use a person's sample for medical research. Most of us have probably had blood taken at some point and some of us will have had an operation. If we have blood taken for a test, there might be some blood left over after the test has been done. Similarly, tissue may be removed during an operation and there may be some left over after any necessary tests have been done on the tissue. So you would not have any additional tissue taken just for research purposes unless you had specifically given permission for this at the time it was going to be taken. In most cases, it is just the leftover blood or tissue that you might agree to donate to medical research.

10. Thinking about leftover blood or tissue being used for medical research, do you think a person needs to be asked for their consent? FOR EACH RESPONSE: Why/why not? How important is this to you?

11. What would you expect to happen to samples that are left over from clinical procedures?

12. The majority of the time, tissue that is left over is destroyed. How do you feel about that?

There are a number of different ways that a person could give their permission or consent for their sample to be used for medical research. I'd like us to think about some of these now and discuss what we like and what we dislike about these different types of consent.

For peer review only - <http://bmjopen.bmj.com/site/about/guidelines.xhtml>



I'd like us to start by thinking about whether we prefer what is known as an **opt-in** system, or whether we prefer an **opt-out** system of sample donation.

Opt-in means that a person has to say that, after they turn 18, they are willing to and actively agree to donate their sample for research. This is how the current system for organ donation works in the UK.

The other approach is an opt-out approach. In this system, it is assumed that a person is happy, after they turn 18, for their sample to be used for research unless they specifically say otherwise. However, there is a mechanism in place for a person who is not willing to donate to opt out.

So, to start with, let's think about the first option, OPT-IN.

13. What do you think are the pros and cons about this approach? Why?

14. Thinking now about the OPT-OUT approach, what do you think are the pros and cons? Why?

15. Which do you prefer? How important is this to you? (AFTER GROUP DISCUSSION: ask participants to complete associated question on questionnaire)

The current system is an opt-in one, so I want us to think about this type of consent now. If you were going to be asked to donate any leftover blood or tissue for medical research there are two ways this could be done. You could be asked to give consent **every time** you have an operation or blood test, or you could give consent just **once for life for all your samples**, with the option of withdrawing at a later point if you wanted to.

16. Thinking about **consent every time**, what do you think are the advantages and disadvantages of this approach?

17. Thinking about **consent once for life**, what do you think are the advantages and disadvantages of this approach?

18. Can you think of any happy medium which might be better?

19. Which would you prefer? Why? How important is this to you? (AFTER GROUP DISCUSSION: ask participants to complete associated question on questionnaire)

20. If people gave consent just once, when and where do you think the best place would be to give consent?

21. If someone wanted to consent to donate their tissue or organs for medical research in the event of their death, do you think it should be obtained at the same time as consent for organ transplantation and recorded on the organ donor register?

In front of you, you have 3 different scenarios. In each one the story is essentially the same, however there are some slight differences and these are highlighted in bold. I'd like to discuss what you think of each of these in turn.

*Read all 3 scenarios out loud highlighting the key differences between the three. Then go back and discuss each one in turn.*

Scenario 1: Lisa is having surgery to remove a lump from her breast which the doctor is concerned may be cancerous. Before the surgery the surgeon explains that once the tissue is removed, they will take it to the laboratory to do tests on it to check what it is. The surgeon then explains that after these tests are done, there may be some tissue left over. He asks Lisa if she would like to donate this left over tissue for medical research. If it is not donated for medical research it will be destroyed. The surgeon doesn't know exactly what kinds of research the tissue might be used for, but it may be used to find better ways to diagnose, prevent and treat cancer. He also explains that before any research is done, it has to be approved by an independent ethics committee.

So, in this scenario:

- Lisa is asked to give consent once to donate the left over tissue for a range of future unknown uses
- Lisa is given some general information about the kind of research the tissue might be used for but nothing specific.
- This type of consent is known as GENERIC CONSENT

22. What do you think about this type of consent?

23. What do you **like** about this approach?

24. Do you have **any concerns** about this approach?

**Scenario 2:** Lisa is having surgery to remove a lump from her breast which the doctor is concerned may be cancerous. Before the surgery the surgeon explains that once the tissue is removed, they will take it to the laboratory to do tests on it to check what it is. The surgeon then explains that after these tests are done, there may be some tissue left over. He asks Lisa if she would like to donate this left over tissue for medical research. If it is not donated for medical research it will be destroyed. The surgeon doesn't know exactly what types of research the tissue might be used for, but it may be used to find better ways to diagnose, prevent and treat cancer. Lisa is asked to sign a consent form. The surgeon explains that **Lisa can indicate on the consent form whether there are any particular kinds of research which she doesn't want the tissue to be used for, for example research involving animals or research conducted outside the UK.** He also explains that before any research is done, it has to be approved by an independent ethics committee.

So, in this scenario:

- Lisa is asked to give consent once to donate the tissue for a range of future unknown uses;
- Lisa is given some general information about the kind of research the tissue might be used for;
- **Lisa can say if there are any particular kinds of research which she doesn't want the tissue to be used for.**
- This type of consent is known as TIERED CONSENT

25. What do you think about this type of consent?

26. What do you **like** about this approach?

27. Do you have any **concerns** about this approach?

Scenario 3: Lisa is having surgery to remove a lump from her breast which the doctor is concerned may be cancerous. Before the surgery the surgeon explains that once the tissue is removed, they will take it to the laboratory to do tests on it to check what it is. The surgeon then explains that after these tests are done, there may be some tissue left over. He asks Lisa if she would like to donate this left over tissue for medical research. If it is not



1  
2 donated for medical research it will be destroyed. The surgeon explains that **the hospital**  
3 **are currently involved in a study looking at the growth of tumours. He informs her**  
4 **that if she gives permission for the left over tissue to be used, it would only be for**  
5 **this particular study.** He also explains that the study has been approved by an  
6 independent ethics committee.  
7

8 So, in this scenario:

- 9
- 10 • **Lisa is only asked to give consent to a particular study and is given**  
11 **information about that study.**
  - 12 • This type of consent is known as SPECIFIC CONSENT

13 28. What do you think about this type of consent?

14 29. What do you **like** about this approach?

15 30. Do you have any **concerns** about this approach?

16  
17  
18  
19  
20  
21 31. In this exercise we have discussed three different types of consent. Which do you  
22 prefer and why? GO ROUND AND ASK PEOPLE (AFTER GROUP DISCUSSION: ask  
23 participants to complete associated question 6 & 7 on questionnaire)

24  
25 32. Generic consent is the most practical type of consent as it is the least costly to put in  
26 place. Researchers try their very best to honour donors' wishes, but in some cases  
27 where they cannot do this with confidence, instead of risking using a sample for  
28 something the donor feels strongly against, it won't be used at all. If your first choice  
29 wasn't generic consent, does this information change your preference? (AFTER  
30 GROUP DISCUSSION: ask participants to complete question 8.

31  
32 33. So, we've discussed which type of consent you would like for left over samples.  
33 Would your preference be any different for samples that you might donate  
34 specifically for research, e.g. if you volunteered to take part in a study and had to  
35 give a saliva or blood sample?

36  
37 34. Would your preference be any different if you were donating what you might  
38 consider to be more sensitive samples e.g. genetic data, stem cells?

39  
40 35. If you decide to withdraw consent would you be happy for researchers to use the  
41 data that had already been generated up to that point using your sample?

42  
43 36. Do you think a central website where you can find out about general research that  
44 your sample might be used for would be useful and something you would use?  
45  
46  
47

### 48 Information (10 minutes)

49  
50 Researchers often need to have access to the donor's medical records in order to be able to  
51 meaningfully interpret the results of the scientific research. However, information, such as  
52 names or addresses are always removed and not included with the sample. This is so that  
53 the person who donated the sample cannot be identified by the scientist conducting the  
54 research or anyone analysing the results of the research. However, the sample may have a  
55 code so that someone not involved in the research can identify the individual if necessary.  
56

57 37. Would you be happy with your medical records being linked to your sample or would  
58 you have concerns? Why?  
59  
60

1  
2 38. Are there any types of information you would not want to be associated with your  
3 sample?  
4

5 Sometimes it can also be helpful for the researcher to have certain information about the  
6 lifestyle of the person who donated the sample, for example whether they smoked, drank  
7 alcohol, how often they exercised etc. This information might help them to better  
8 understand the particular condition they are investigating.  
9

10 39. Would you be happy for this information to be made available or would you have  
11 concerns about your lifestyle information being associated with your sample? Why?  
12  
13

#### 14 **Ownership of sample (5 minutes)**

15  
16 40. What significance do you attach to a biological sample once it has been removed  
17 from your body? Do you still see it as yours or part of you in some way? Are you  
18 owed money if a drug is developed using your sample?  
19  
20  
21  
22  
23  
24  
25  
26  
27  
28  
29  
30  
31  
32  
33  
34  
35  
36  
37  
38  
39  
40  
41  
42  
43  
44  
45  
46  
47  
48  
49  
50  
51  
52  
53  
54  
55  
56  
57  
58  
59  
60

## Appendix IV

### CONSENT MODELS

#### GENERIC CONSENT

**Scenario 1:** Lisa is having surgery to remove a lump from her breast which the doctor is concerned may be cancerous. Before the surgery the surgeon explains that once the tissue is removed, they will take it to the lab to do tests on it to check what it is. After these tests are done, there may be some tissue left over. He asks Lisa if she would like to donate this left over tissue for medical research. If it is not donated for medical research it will be destroyed. The surgeon doesn't know exactly what kinds of research the tissue might be used for, but it may be used to find better ways to diagnose, prevent and treat cancer. He also explains that before any research is done, it has to be approved by an independent ethics committee.

So, in this scenario:

- Lisa is asked to give consent once to donate the left over tissue for a range of future unknown uses
- Lisa is given some general information about the kind of research the tissue might be used for but nothing specific.

#### TIERED CONSENT

**Scenario 2:** Lisa is having surgery to remove a lump from her breast which the doctor is concerned may be cancerous. Before the surgery the surgeon explains that once the tissue is removed, they will take it to the lab to do tests on it to check what it is. After these tests are done, there may be some tissue left over. He asks Lisa if she would like to donate this left over tissue for medical research. If it is not donated for medical research it will be destroyed. The surgeon doesn't know exactly what types of research the tissue might be used for, but it may be used to find better ways to diagnose, prevent and treat cancer. Lisa is asked to sign a consent form. The surgeon explains that **Lisa can indicate on the consent form whether there are any particular types of research which she doesn't want the tissue to be used for, e.g. research involving animals or research outside the UK.** He also explains that before any research is done, it has to be approved by an independent ethics committee.

So, in this scenario:

- Lisa is asked to give consent once to donate the tissue for a range of future unknown uses;
- Lisa is given some general information about the kind of research the tissue might be used for;
- **Lisa can say if there are any particular types of research which she doesn't want the tissue to be used for.**

#### SPECIFIC CONSENT

**Scenario 3:** Lisa is having surgery to remove a lump from her breast which the doctor is concerned may be cancerous. Before the surgery the surgeon explains that once the tissue is removed, they will take it to the lab to do tests on it to check what it is. After these tests are done, there may be some tissue left over. He asks Lisa if she would like to donate this left over tissue for medical research. If it is not donated for medical research it will be destroyed. The surgeon explains that **the hospital are currently involved in a study looking at the growth of tumours. He informs her that if she gives permission for the left over tissue to be used, it would only be for this particular study.** He also explains that the study has been approved by an independent ethics committee.

So, in this scenario:

- **Lisa is only asked to give consent to a particular study and is given information about that study.**

## Appendix V

Survey looking at the publics' views on donating biological samples for medical research

*This survey was originally conducted online in September 2012 and hosted by the market research company Research Now.*

Q1. What age are you?

1. 18-24
2. 25-34
3. 35-44
4. 45-54
5. 55-64
6. 65+

Q2. Are you male or female?

1. Male
2. Female

Q3. What is the occupation of person who receives the highest income in your household?

1. Higher managerial/ professional/ administrative (e.g. established doctor, solicitor, board director in a large organisation (200+ employees, top level civil servant/public service employee)) **(A – Letters will be hidden)**
2. Intermediate managerial/ professional/ administrative (e.g. newly qualified (under 3 years) doctor, solicitor, board director small organisation, middle manager in large organisation, principle officer in civil service/local government) **(B)**
3. Supervisory or clerical level/ junior managerial/ professional/ administrative (e.g. office worker, student doctor, foreman with 25+ employees, salesperson, etc) **(C1)**
4. Student **(C1)**
5. Skilled manual worker (e.g. skilled bricklayer, carpenter, plumber, painter, bus/ ambulance driver, HGV driver, AA patrolman, pub/bar worker, etc) **(C2)**
6. Semi or unskilled manual work (e.g. manual workers, all apprentices to be skilled trades, caretaker, park keeper, non-HGV driver, shop assistant) **(D)**
7. Casual worker – not in permanent employment **(E)**
8. Housewife/househusband/ homemaker **(E)**
9. Retired and living on state pension **(E)**
10. Unemployed or not working due to long-term sickness **(E)**
11. Full-time carer of other household member **(E)**
98. Other (specify)

Q4. What region do you live in?

1. Channel Islands
2. East of England
3. East Midlands
4. London
5. North East
6. North West
7. Northern Ireland
8. Scotland
9. South East
10. South West
11. Wales
12. West Midlands
13. Yorkshire / Humberside
96. Not on Map

Q5. Please choose one option that best describes your ethnic group or background.

1. White or White British
2. Mixed race
3. Asian or Asian British (not Chinese)
4. Black or Black British
5. Chinese
6. Other ethnic group
96. Prefer not to say

Q6. Which religion do you most identify with?

1. Christianity
2. Islam
3. Hinduism
4. Sikhism
5. Judaism
6. Buddhism
7. Other religion
8. No religion
96. Prefer not to say

Q7. If you do have a religion you identify with, to what extent do you consider yourself religious?

1. Not at all religious
2. Moderately religious
3. Very religious
96. Prefer not to say

1  
2  
3  
4 Q8. Please indicate which, if any, is the highest educational or professional qualification you  
5 have obtained.  
6

- 7
- 8 1. No formal qualification
- 9 2. GCSE, O level, Scottish Standard Grade or equivalent
- 10 3. GCE, A-level, Scottish Higher or similar
- 11 4. Vocational (BTEC/NVQ/Diploma)
- 12 5. Degree level or above
- 13 96. Prefer not to say
- 14
- 15

16  
17 Q9. How would you describe your own level of knowledge about the medical research process  
18 including the use of human tissue samples?  
19

- 20 1. No knowledge
- 21 2. Some knowledge
- 22 3. Good knowledge
- 23
- 24

25  
26 Q10. Are you or have you ever been affected by a long-standing illness, disability or infirmity  
27 which has required continuous or frequent medical attention (e.g. cancer, diabetes, heart disease,  
28 asthma, a genetic condition)?  
29

- 30 1. Yes
- 31 2. No
- 32
- 33

34  
35 Q11. Has a close family member ever been affected by a long-standing illness, disability or  
36 infirmity which has required continuous or frequent medical attention (e.g. cancer, diabetes, heart  
37 disease, asthma, a genetic condition)?  
38

- 39 1. Yes
- 40 2. No
- 41
- 42

43  
44 Q12. Have you ever had blood or tissue removed during a medical or surgical procedure?  
45

- 46 1. Yes
- 47 2. No
- 48 97. Don't know
- 49

50  
51 Q13. Have you ever been asked to donate any blood or tissue for medical research?  
52

- 53 1. Yes
- 54 2. No
- 55 97. Don't know
- 56
- 57

58 **ASK IF CODED 1 AT Q13.**  
59  
60

1  
2  
3 Q14. Did you agree to donate?  
4

- 5 1. Yes  
6 2. No  
7  
8 97. Don't know  
9

10 **ASK IF CODED 2 AT Q14.**

11 Q14a. Please tell us a little bit about your reasons for choosing not to donate.

12 *There are no right or wrong answers – we're just interested in your honest opinion.*  
13

14  
15 This survey is being done to help us understand public opinion about human tissue samples donated  
16 by people for medical research.  
17

18  
19 Medical research is essential to improve our understanding of what keeps us healthy and how  
20 diseases start and progress. It also means scientists can develop new and improved treatments.  
21 Body fluid such as blood, saliva and urine, and human tissue such as cells, skin, fat or even whole  
22 organs (in the event of someone's death), are often used in scientific and medical research. Usually  
23 these are referred to as samples.  
24

25  
26 Types of research that need samples include:  
27

- 28  
29 • Looking at how the body works to fight disease.  
30 • Looking at why some people are more likely to develop certain diseases.  
31 • Developing tests to diagnose conditions like cancer or dementia earlier on.  
32 • Testing new treatments for conditions such as heart disease and diabetes.  
33 • Researching how certain types of cells could be used to treat conditions like Parkinson's  
34 disease and Alzheimer's disease.  
35  
36

37  
38 Many of the tests and treatments used today resulted from people donating samples for research  
39 previously. The removal of samples from a person is always done with the donor's permission.  
40 Samples that are donated for research are anonymised so that the researcher using the sample does  
41 not know who it came from. The types of research that are allowed to take place are highly  
42 regulated by both UK law and also by independent research ethics committees (usually made up of  
43 doctors, scientist, patients and the general public). These ensure any research allowed to be done is  
44 for the benefit of patients.  
45  
46

47  
48 *The next button will appear shortly. In the meantime take some time to read the information above  
49 as it relates to the remainder of the survey.*  
50

51 Q15. On a scale of 1 to 5 with 1 being Not At All Important and 5 being Extremely Important, how  
52 important do you think it is for people to donate samples for medical research?  
53

54  
55 **SCALE:**

- 56 1. Not at all important  
57 2.  
58  
59  
60



- 3.
- 4.
5. Extremely important
97. Don't know

Q16. Samples can be left over from surgery or a medical procedure, or they can be donated specifically for research. Left over samples that are not required for clinical diagnosis or donated for medical research are often destroyed.

In general, would you like to be asked to donate samples for medical research?

1. Definitely yes
2. Probably yes
3. Probably not
4. Definitely not
97. Don't know

#### RANDOMISE STATEMENTS

Q17. You are having a medical procedure to treat a health issue. Would you donate the following types of samples for medical research if they were left over (after necessary medical tests had been done) following the procedure?

#### SCALE:

1. Definitely yes
2. Probably yes
3. Probably not
4. Definitely not
97. Don't know

#### STATEMENTS:

1. Blood
2. Skin tissue
3. Fat
4. Cancerous tissue
5. Liver tissue
6. Bone or cartilage
7. Spare eggs not fertilised during IVF treatment (IVF is a process by which an egg is fertilised by a sperm outside the body and then transferred back into the body to establish a successful pregnancy) **ASK ONLY FEMALES**
8. Spare embryos (fertilised eggs) not transferred back into the body following IVF (IVF is a process by which an egg is fertilised by a sperm outside the body and then transferred back into the body to establish a successful pregnancy)

#### RANDOMISE STATEMENTS

1  
2  
3 Q18. You've gone to the hospital for an appointment and whilst you are in the waiting room the  
4 receptionist explains they are collecting samples for medical research. Would you agree to donate  
5 the following types of samples specifically for medical research, i.e. not as part of any medical  
6 procedure, put purely for the purposes of research?  
7

8  
9 Would you agree to donate the following types of samples specifically for medical research?  
10 Below are some definitions you might need to know in order to answer the questions.  
11

12  
13 *Local anaesthetic - "A type of painkilling medication that is used to numb areas of the body during*  
14 *surgical procedures. You stay awake when you have a local anaesthetic"*  
15

16  
17 *General anaesthetic - "A medication that causes loss of sensation. It is used to give pain relief during*  
18 *surgery. General anaesthetic makes you completely lose consciousness so that surgery can be carried*  
19 *out without causing any pain or discomfort. Most healthy people don't have any problems when*  
20 *having a general anaesthetic. However, as with most medical procedures, there is a small risk of*  
21 *long-term complications and, rarely, death."*  
22

23  
24 **SCALE:**

- 25 1. Definitely yes  
26 2. Probably yes  
27 3. Probably not  
28 4. Definitely not  
29 97. Don't know  
30  
31

32  
33  
34 **STATEMENTS:**

- 35 1. Saliva  
36 2. Urine  
37 3. Blood  
38 4. Tissue collected requiring a local anaesthetic (e.g. a skin cell scraping)  
39 5. Tissue collected requiring a general anaesthetic (e.g. a liver sample)  
40 6. Sperm **ASK ONLY MALES**  
41  
42  
43  
44

45 Q19. In the event of your death, would you be willing to donate the following for medical  
46 research?  
47

48 **SCALE:**

- 49 1. Definitely yes  
50 2. Probably yes  
51 3. Probably not  
52 4. Definitely not  
53 97. Don't know  
54  
55

56  
57 **STATEMENTS:**  
58  
59  
60

1. A small sample of the liver
2. A small sample of the brain
3. A whole liver
4. A whole brain

Q20. You are having surgery for a health issue which requires a general anaesthetic. The surgeon asks you whether you would be willing to consent to any additional tissue (i.e. tissue not needing to be removed as part of the health issue) being taken during the surgery for medical research. He assures you that any additional tissue taken would have no impact for you or your health and that no extra tissue would be removed without your consent.

A decision to consent or not to consent would be equally respected and would have no impact on the care you receive.

Would you be willing to donate the following types of samples for medical research?

*General anaesthetic - "A medication that causes loss of sensation. It is used to give pain relief during surgery. General anaesthetic makes you completely lose consciousness so that surgery can be carried out without causing any pain or discomfort. Most healthy people don't have any problems when having a general anaesthetic. However, as with most medical procedures, there is a small risk of long-term complications and, rarely, death."*

**SCALE:**

1. Definitely yes
2. Probably yes
3. Probably not
4. Definitely not
97. Don't know

**STATEMENTS:**

1. Samples taken from the same part of the body being operated on
2. Samples taken from an area close by
3. Samples involving an additional procedure e.g. taking bone marrow or a tissue sample whilst under the same general anaesthetic

**RANDOMISE STATEMENTS**

Q21. Samples may be used for lots of different types of research. The types of research that are allowed to take place are highly regulated by both UK law and also by research ethics committees. Would you be willing to donate samples for the following types of research?

*Research ethics committee - "A committee usually made up of doctors, scientist, patients and the general public. These ensure any research allowed to be done is for the benefit of patients."*

**SCALE:**

1. Definitely yes
2. Probably yes
3. Probably not
4. Definitely not
97. Don't know

**STATEMENTS:**

1. Understanding how our body fights disease
2. Understanding how our genetic makeup influences whether or not we will be affected by certain conditions
3. Testing new treatments
4. Research which involves using cells that come from embryos (*fertilised eggs*)
5. Research involving animals
6. Research conducted outside of the UK

**RANDOMISE ORDER OF STATEMENTS.**

Q22. There are many places where research is performed, such as universities, the NHS, medical research charities such as Cancer Research UK and Arthritis Research UK, pharmaceutical companies and diagnostic companies. These organisations work individually, and often in collaboration, to carry out research, to understand disease, develop tests for diseases and develop and test new treatments.

Would you be willing to donate samples to the following organisations to carry out approved medical research?

*Diagnostic companies - "A company which develops and manufactures medical tests to diagnose diseases"*

**SCALE:**

1. Definitely yes
2. Probably yes
3. Probably not
4. Definitely not
97. Don't know

**STATEMENTS**

1. NHS hospitals
2. Universities
3. Medical research charities
4. Pharmaceutical companies
5. Diagnostic companies

1  
2  
3  
4 Q23. Samples left over following surgery and once any necessary tests have been done, can be  
5 anonymised and used for medical research. On a scale of 1 to 5 with 1 being Not At All Important  
6 and 5 being Extremely Important, how important do you think it is that you are first asked for your  
7 permission (often known as 'consent') for any left over samples to be used for medical research?  
8 *Anonymised - i.e. identifying features such as names and addresses are removed*  
9

10  
11  
12 **SCALE:**

- 13 1. Not at all important  
14 2.  
15 3.  
16 4.  
17 5. Extremely important  
18  
19

20  
21  
22 Q24. There are a number of different ways that a person could give consent for their left over  
23 samples to be used for medical research.  
24

- 25 a) One way is an 'opt-in' system. Opt-in means that a person must specifically be asked for  
26 their permission before any leftover samples can be used in medical research.  
27  
28 b) The other way is an 'opt-out' system. In this system, it is assumed that a person is happy,  
29 after they turn 18 years old, for any leftover samples to be used for medical research unless they  
30 specifically say otherwise.  
31  
32

33  
34 Which of the two systems to donating leftover samples do you prefer?  
35

- 36 1. Opt-in  
37 2. Opt-out  
38 3. No preference  
39 97. Don't know  
40  
41  
42  
43

44 Q25. The current system in the UK is an opt-in system. That means you have to say whether you  
45 want any leftover samples to be donated for medical research. If you were going to be asked to  
46 donate any leftover samples for medical research there are three ways this could be done.  
47  
48

- 49 a) You could be asked to give consent for left over samples to be used for research **every time**  
50 you have samples removed, or  
51  
52 b) you could be asked just **once for life** for any future left over samples to be used for medical  
53 research (with the option of withdrawing your permission at any later point if you wanted to),  
54  
55 c) you could be **asked at certain points** during your life, for example every 10 years by your GP,  
56 or at the start of treatment for a particular condition or health issue.  
57  
58  
59  
60

1  
2  
3 Which of these three approaches do you prefer?  
4  
5

- 6 1. Consent every time
- 7 2. Consent once for life
- 8 3. Consent at certain points
- 9 4. No preference
- 10 97. Don't know
- 11
- 12
- 13

14 Q26. If you were going to be asked to donate left over samples for medical research every time  
15 you had a medical procedure, would you rather this was discussed with you by a health  
16 professional before the medical procedure or afterwards?  
17

- 18 1. Before
- 19 2. After
- 20 3. No preference
- 21 97. Don't know
- 22
- 23
- 24
- 25
- 26

27 Q27. If we adopted a consent once for life system in the UK for adults (i.e. aged 18 years and  
28 over), when would you prefer to be asked about consenting left over samples for medical  
29 research? *Choose up to 3 options.*  
30

- 31 1. When registering at a GP surgery
- 32 2. During a routine GP appointment
- 33 3. When applying for a driving license
- 34 4. When applying for a passport
- 35 5. The first time I visit the hospital
- 36 6. The first time I have a medical procedure (e.g. blood test or surgery)
- 37 98. Other (please specify)
- 38
- 39
- 40
- 41
- 42

43 Q28. What would be your preferred way to register your consent to donate left over samples for  
44 medical research?  
45

- 46 1. Face to face with a health professional
- 47 2. Letter
- 48 3. Email
- 49 4. Telephone
- 50 5. Via a website
- 51 6. Completing a form (from a GP surgery, post office, library or other community centre) and  
52 returning it by post
- 53 98. Other (please specify)
- 54 97. Don't know
- 55
- 56
- 57
- 58
- 59
- 60

1  
2  
3  
4 Q29. If you later decided you didn't want your samples to be used for medical research, what  
5 would be your preferred way to withdraw that consent?  
6  
7

- 8 1. Face to face with a health professional
- 9 2. Letter
- 10 3. Email
- 11 4. Telephone
- 12 5. Via a website
- 13 6. Completing a form (from a GP surgery, post office, library or other community centre) and  
14 returning it by post
- 15 98. Other (please specify)
- 16 97. Don't know
- 17
- 18
- 19
- 20

21  
22 Q30. Imagine you have agreed to donate a sample for medical research. There are a number of  
23 ways you can give consent for that particular sample to be used:  
24

#### 25 STATEMENTS

- 26
- 27
- 28 1. You can give consent once for your sample to be used in any future research that has been  
29 approved by a research ethics committee. This type of consent is called Generic Consent.
- 30

31 Thinking about Generic Consent, if this was the type of consent you were asked to give, how  
32 likely would you be to donate samples for medical research?  
33

34  
35 *Research ethics committee. "A committee usually made up of doctors, scientist, patients and  
36 the general public. These ensure any research allowed to be done is for the benefit of  
37 patients."*  
38

- 39
- 40
- 41
- 42 2. You can give consent once for your sample to be used in any future research that has been  
43 approved by a research ethics committee but with the option of saying whether there are  
44 certain types of research you don't want your sample to be used for. This type of consent is  
45 called Tiered Consent.  
46

47 Thinking about Tiered Consent, if this was the type of consent you were asked to give, how  
48 likely would you be to donate samples for medical research?  
49

50  
51  
52 *Research ethics committee. "A committee usually made up of doctors, scientist, patients and  
53 the general public. These ensure any research allowed to be done is for the benefit of  
54 patients."*  
55



- 1  
2  
3 3. You can give consent once for the sample to be used for a specific study that you have been  
4 told about, which has been approved by a research ethics committee. The sample will not be  
5 used for any other research other than the particular study you have given consent for. Any  
6 leftover tissue at the end of the study may be destroyed. This type of consent is called  
7 Specific Consent – once only.  
8

9  
10 Thinking about Specific Consent – once only, if this was the type of consent you were asked  
11 to give, how likely would you be to donate samples for medical research?  
12

13  
14 *Research ethics committee. "A committee usually made up of doctors, scientist, patients and*  
15 *the general public. These ensure any research allowed to be done is for the benefit of*  
16 *patients."*  
17

- 18  
19  
20 4. **Lastly**, you can give consent every time for the sample to be used for a specific study that  
21 you have been told about, which has been approved by a research ethics committee. With  
22 this type of consent you would then be contacted and asked for your consent for every new  
23 study in which your sample might be used. This type of consent is called Consent for every  
24 new study.  
25

26  
27 Thinking about Consent for every new study if this was the type of consent you were asked  
28 to give, how likely would you be to donate samples for medical research?  
29

30  
31 *Research ethics committee. "A committee usually made up of doctors, scientist, patients and*  
32 *the general public. These ensure any research allowed to be done is for the benefit of*  
33 *patients."*  
34

35 **SCALE:**

- 36 1. Definitely yes  
37 2. Probably yes  
38 3. Probably not  
39 4. Definitely not  
40  
41 97. Don't know  
42

43  
44  
45 Q31. Which of these four types of consent do you prefer? Please rank them in order of preference.  
46 Put 1 for your first preference; 2 for your second; 3 for your third preference and 4 for your last  
47 preference. If you don't have any preference, and like all 4 equally, tick the 'No preference' you  
48 don't know then tick ' Don't know'  
49

- 50  
51 1. Generic consent  
52 2. Tiered consent  
53 3. Specific consent – once only  
54 4. Consent for every new study  
55 5. No preference  
56  
57 97. Don't know  
58  
59  
60

**ASK TO THOSE PEOPLE WHO DID NOT RANK GENERIC CONSENT AS FIRST CHOICE**

Q32. Generic consent is the most practical type of consent as it is the least costly to put in place. Researchers try their very best to honour donors' wishes, but in some cases where it is too costly to put Tiered or Specific Consent in place, instead of risking using a sample for something the donor feels strongly against, it won't be used at all. If Tiered or Specific consent was not available, what would you do?

1. I would agree to give generic consent
2. I would rather my sample was not used at all
97. Don't know

Q33. Some people feel there are certain types of samples that are more sensitive to donate, for example sperm or left over eggs. If there was a sample that you considered to be sensitive, but were still willing to donate for medical research, which of the four types of consent would you prefer to give?

1. Generic consent
2. Tiered consent
3. Specific consent – once only
4. Consent for every new study
5. No preference
97. Don't know

Q34. Researchers often need to have access to the donor's medical records to be able to interpret the results of their scientific research. However, information such as names or addresses are always removed and are not included with the sample. This is so that the person who donated the sample cannot be identified by the scientist conducting the research or anyone analysing the results of the research. However, the sample may have a code so that someone not involved in the research can identify the individual if necessary, for example, if there was a serious health issue the donor should be aware of.

Would you be willing to have your anonymised medical records linked to your sample?

1. Definitely yes
2. Probably yes
3. Probably not
4. Definitely not
97. Don't know

Q35. Sometimes it can also be helpful for the researcher to have certain information about the lifestyle of the person who donated the sample, for example whether they smoke, drink alcohol, how often they exercise etc. This information might help them to better understand the particular

1  
2  
3 condition they are investigating. Would you be willing to have your anonymised lifestyle  
4 information linked to your sample?  
5

- 6  
7 1. Definitely yes  
8 2. Probably yes  
9 3. Probably not  
10 4. Definitely not  
11 97. Don't know  
12

13  
14  
15 Q36. For some people, it would be interesting to find out what type of medical research is going  
16 on. How would you like to get information on medical research including research on a particular  
17 condition that might use your sample?  
18

- 19  
20 1. Website  
21 2. Newsletter  
22 3. Email  
23 4. Letter  
24 5. Would not be interested in additional information  
25  
26

27  
28 Q37. If you were considering donating whole organs for medical research in the event of your  
29 death, are there any particular organs you would **not** feel comfortable donating?  
30 Please choose all that apply.  
31

- 32  
33 1. Brain  
34 2. Eyes  
35 3. Heart  
36 4. Kidneys  
37 5. Liver  
38 6. Lungs  
39 7. I would **not** donate any of my organs for medical research  
40 8. None of the above apply as I would be happy to donate either all my organs or whole body  
41 for research  
42  
43 98. Other organs I would not donate (please state)  
44  
45  
46  
47

48  
49 Q38. Sometimes, organs donated for transplant can't be transplanted because for some reason  
50 they are not suitable. However, these organs can still be very useful to researchers. Would you be  
51 willing to donate organs you had intended for transplant for medical research instead if the organ  
52 was not suitable?  
53

- 54  
55 1. Yes, I would donate an organ for research if it was not suitable for transplant  
56 2. No, if they can't be used for transplant I would prefer they were not used at all  
57 3. I would not agree to donate an organ for transplant  
58  
59  
60

1  
2  
3 97. Don't know  
4

5 Q39. If someone wanted to donate their tissue or organs for medical research in the event of  
6 their death, how do you think they should be able to provide their consent to do this?  
7

- 8  
9 1. It should be obtained at the same time as consent for organ transplantation and recorded on  
10 the organ donor register  
11 2. It should be discussed at a GP appointment and recorded in the patients' notes  
12 3. It should be discussed at a hospital and recorded in the patients' notes  
13 98. Other (please specify)  
14 97. Don't know  
15  
16  
17

18  
19 Q40. Someone has indicated in writing that they are willing to donate tissue or organs for medical  
20 research in the event of their death. After the donor's death the relatives decide they disagree with  
21 the donor's wishes. Do you think the relatives should be allowed to override the donor's wishes?  
22

- 23  
24 1. Yes  
25 2. No  
26 97. Don't know  
27  
28  
29

30 Q41. If you have any particular views you would like to share with us about the topics raised in this  
31 questionnaire please feel free to write them here:  
32  
33  
34  
35  
36  
37  
38  
39  
40  
41  
42  
43  
44  
45  
46  
47  
48  
49  
50  
51  
52  
53  
54  
55  
56  
57  
58  
59  
60

## Appendix VI

## Results of survey –unweighted and weighted

| Demographic Data              |            |     |          |     |
|-------------------------------|------------|-----|----------|-----|
|                               | Unweighted |     | Weighted |     |
|                               | N          | %   | N        | %   |
| <b>Sex</b>                    |            |     |          |     |
| Male                          | 504        | 45% | 544      | 49% |
| Female                        | 606        | 55% | 566      | 51% |
| <b>Socioeconomic Group</b>    |            |     |          |     |
| A                             | 41         | 4%  | 44       | 4%  |
| B                             | 215        | 19% | 244      | 22% |
| C1                            | 311        | 28% | 322      | 29% |
| C2                            | 233        | 21% | 233      | 21% |
| D                             | 145        | 13% | 178      | 16% |
| E                             | 165        | 15% | 89       | 8%  |
| <b>Age</b>                    |            |     |          |     |
| 18–24                         | 135        | 12% | 133      | 12% |
| 25–34                         | 184        | 17% | 189      | 17% |
| 35–44                         | 198        | 18% | 200      | 18% |
| 45–54                         | 184        | 17% | 189      | 17% |
| 55–64                         | 176        | 16% | 167      | 15% |
| 65+                           | 233        | 21% | 233      | 21% |
| <b>Occupation</b>             |            |     |          |     |
| Higher managerial             | 41         | 4%  | 44       | 4%  |
| Intermediate managerial       | 215        | 19% | 244      | 22% |
| Supervisory or clerical level | 288        | 26% | 299      | 27% |
| Student                       | 23         | 2%  | 23       | 2%  |
| Skilled manual worker         | 233        | 21% | 233      | 21% |
| Semi or unskilled manual work | 145        | 13% | 178      | 16% |
| Casual worker                 | 12         | 1%  | 6        | 1%  |
| Housewife                     | 9          | 1%  | 5        | 0%  |
| Retired                       | 81         | 7%  | 45       | 4%  |
| Unemployed                    | 46         | 4%  | 24       | 2%  |
| Carer                         | 17         | 2%  | 9        | 1%  |
| Other                         | 0          | 0%  | 0        | 0%  |
| <b>Region</b>                 |            |     |          |     |
| Channel Islands               | 0          | 0%  | 0        | 0%  |
| East of England               | 92         | 8%  | 100      | 9%  |
| East Midlands                 | 57         | 5%  | 78       | 7%  |

## Appendix VI

## Results of survey –unweighted and weighted

|                                                           |      |     |      |     |
|-----------------------------------------------------------|------|-----|------|-----|
| London                                                    | 213  | 19% | 144  | 13% |
| North East                                                | 40   | 4%  | 44   | 4%  |
| North West                                                | 121  | 11% | 122  | 11% |
| Northern Ireland                                          | 30   | 3%  | 33   | 3%  |
| Scotland                                                  | 76   | 7%  | 89   | 8%  |
| South East                                                | 165  | 15% | 155  | 14% |
| South West                                                | 81   | 7%  | 89   | 8%  |
| Wales                                                     | 51   | 5%  | 55   | 5%  |
| West Midlands                                             | 94   | 8%  | 100  | 9%  |
| Yorkshire/Humberlands                                     | 90   | 8%  | 100  | 9%  |
| Not on map                                                | 0    | 0%  | 0    | 0%  |
| <b>Ethnicity</b>                                          |      |     |      |     |
| White or White British                                    | 1057 | 95% | 1065 | 96% |
| Mixed race                                                | 7    | 1%  | 8    | 1%  |
| Asian or Asian British (not Chinese)                      | 18   | 2%  | 17   | 1%  |
| Black or Black British                                    | 19   | 2%  | 12   | 1%  |
| Chinese                                                   | 2    | 0%  | 2    | 0%  |
| Other ethnic group                                        | 4    | 0%  | 2    | 0%  |
| Prefer not to say                                         | 3    | 0%  | 2    | 0%  |
| <b>Religion</b>                                           |      |     |      |     |
| Christianity                                              | 677  | 61% | 673  | 61% |
| Islam                                                     | 13   | 1%  | 11   | 1%  |
| Hinduism                                                  | 6    | 1%  | 6    | 1%  |
| Sikhism                                                   | 0    | 0%  | 0    | 0%  |
| Judaism                                                   | 6    | 1%  | 4    | 1%  |
| Buddhism                                                  | 11   | 1%  | 1    | 0%  |
| Other religion                                            | 15   | 1%  | 8    | 0%  |
| No religion                                               | 370  | 33% | 205  | 38% |
| Prefer not to say                                         | 12   | 1%  | 7    | 1%  |
| <b>To what extent do you consider yourself religious?</b> |      |     |      |     |
| Not at all religious                                      | 234  | 32% | 234  | 32% |
| Moderately religious                                      | 422  | 58% | 424  | 59% |
| Very religious                                            | 64   | 9%  | 56   | 8%  |
| Prefer not to say                                         | 8    | 1%  | 7    | 1%  |
| <b>Education</b>                                          |      |     |      |     |
| No formal qualification                                   | 70   | 6%  | 66   | 6%  |
| GCSE, O level, Scottish Standard Grade or equivalent      | 264  | 24% | 252  | 23% |

## Appendix VI

## Results of survey –unweighted and weighted

|                                          |     |     |     |     |
|------------------------------------------|-----|-----|-----|-----|
| GCE, A-level, Scottish Higher or similar | 214 | 19% | 214 | 19% |
| Vocational (BTEC/NVQ/Diploma)            | 230 | 21% | 237 | 21% |
| Degree level or above                    | 317 | 29% | 330 | 30% |
| Prefer not to say                        | 15  | 1%  | 10  | 1%  |

### Q9 How would you describe your own level of knowledge about the medical research process including the use of human tissue samples?

|                | Unweighted |      | Weighted |      |
|----------------|------------|------|----------|------|
|                | N          | %    | N        | %    |
| No knowledge   | 463        | 42%  | 466      | 42 % |
| Some knowledge | 603        | 54 % | 602      | 54 % |
| Good knowledge | 44         | 4 %  | 43       | 4 %  |

### Q10 Are you or have you ever been affected by a long-standing illness, disability or infirmity which has required continuous or frequent medical attention

|     | Unweighted |      | Weighted |     |
|-----|------------|------|----------|-----|
|     | N          | %    | N        | %   |
| Yes | 399        | 36 % | 391      | 35% |
| No  | 711        | 64 % | 719      | 65% |

### Q11 Has a close family member ever been affected by a long-standing illness, disability or infirmity which has required continuous or frequent medical attention

|     | Unweighted |      | Weighted |     |
|-----|------------|------|----------|-----|
|     | N          | %    | N        | %   |
| Yes | 767        | 69 % | 765      | 69% |
| No  | 343        | 31 % | 345      | 31% |

### Q12 Have you ever had blood or tissue removed during a medical or surgical procedure?

|  | Unweighted | Weighted |
|--|------------|----------|
|  |            |          |



## Appendix VI

## Results of survey –unweighted and weighted

|            | N   | %    | N   | %   |
|------------|-----|------|-----|-----|
| Yes        | 446 | 40 % | 444 | 40% |
| No         | 553 | 50 % | 551 | 50% |
| Don't Know | 111 | 10 % | 115 | 10% |

### Q13 Have you ever been asked to donate any blood or tissue for medical research?

|            | Unweighted |      | Weighted |     |
|------------|------------|------|----------|-----|
|            | N          | %    | N        | %   |
| Yes        | 182        | 16 % | 177      | 16% |
| No         | 904        | 81 % | 907      | 82% |
| Don't Know | 24         | 2 %  | 25       | 2%  |

### Q14 Did you agree to donate?

|            | Unweighted |      | Weighted |     |
|------------|------------|------|----------|-----|
|            | N          | %    | N        | %   |
| Yes        | 155        | 85 % | 153      | 86% |
| No         | 23         | 13 % | 21       | 12% |
| Don't Know | 4          | 2 %  | 3        | 2%  |

### Q15 On a scale of 1 to 5 with 1 being Not At All Important and 5 being Extremely Important, how important do you think it is for people to donate samples for medical research?

|                        | Unweighted |      | Weighted |     |
|------------------------|------------|------|----------|-----|
|                        | N          | %    | N        | %   |
| 1 Not at all important | 5          | 0 %  | 4        | 0%  |
| 2                      | 10         | 1 %  | 9        | 1%  |
| 3                      | 78         | 7 %  | 76       | 7%  |
| 4                      | 406        | 37 % | 408      | 37% |
| 5 Extremely important  | 554        | 50 % | 567      | 51% |
| Don't know             | 57         | 5 %  | 46       | 4%  |

## Appendix VI

Results of survey –unweighted and weighted

### Q16 In general, would you like to be asked to donate samples for medical research?

|                | Unweighted |      | Weighted |     |
|----------------|------------|------|----------|-----|
|                | N          | %    | N        | %   |
| Definitely yes | 317        | 29 % | 327      | 29% |
| Probably yes   | 513        | 46 % | 526      | 47% |
| Probably not   | 157        | 14 % | 145      | 13% |
| Definitely not | 42         | 4 %  | 35       | 3%  |
| Don't know     | 81         | 7 %  | 77       | 7%  |

### Q17 Would you donate the following types of samples for medical research if they were left over following the procedure?

|                                  |   | Unweighted |          |          |         |            | Weighted |          |          |         |            |
|----------------------------------|---|------------|----------|----------|---------|------------|----------|----------|----------|---------|------------|
|                                  |   | Def yes    | Prob yes | Prob not | Def not | Don't know | Def yes  | Prob yes | Prob not | Def not | Don't know |
| Blood                            | N | 587        | 433      | 48       | 23      | 19         | 599      | 425      | 48       | 20      | 8          |
|                                  | % | 53%        | 39%      | 4%       | 2%      | 2%         | 54%      | 38%      | 4%       | 2%      | 2%         |
| Skin Tissue                      | N | 520        | 451      | 72       | 32      | 35         | 533      | 451      | 67       | 28      | 32         |
|                                  | % | 47%        | 41%      | 6%       | 3%      | 3%         | 48%      | 41%      | 6%       | 3%      | 3%         |
| Fat                              | N | 530        | 450      | 60       | 32      | 38         | 541      | 449      | 56       | 26      | 37         |
|                                  | % | 48 %       | 41%      | 5%       | 3%      | 3%         | 49%      | 40%      | 5%       | 2%      | 3%         |
| Cancerous Tissue                 | N | 572        | 425      | 52       | 26      | 35         | 586      | 420      | 49       | 22      | 34         |
|                                  | % | 52 %       | 38%      | 5%       | 2%      | 3%         | 53%      | 38%      | 4%       | 2%      | 3%         |
| Liver Tissue                     | N | 463        | 468      | 100      | 38      | 41         | 474      | 476      | 96       | 34      | 39         |
|                                  | % | 42 %       | 42%      | 9%       | 3%      | 4%         | 43%      | 42%      | 9%       | 3%      | 4%         |
| Bone or Cartilage                | N | 472        | 460      | 90       | 46      | 42         | 482      | 460      | 87       | 41      | 40         |
|                                  | % | 43 %       | 41%      | 8%       | 4%      | 4%         | 43%      | 41%      | 8%       | 4%      | 4%         |
| Spare eggs not fertilised during | N | 133        | 159      | 121      | 104     | 89         | 128      | 149      | 111      | 93      | 86         |
|                                  | % | 22 %       | 26%      | 20%      | 17%     | 15%        | 23%      | 26%      | 20%      | 16%     | 15%        |

## Appendix VI

## Results of survey –unweighted and weighted

|               |   |      |     |     |     |     |     |     |     |     |     |
|---------------|---|------|-----|-----|-----|-----|-----|-----|-----|-----|-----|
| IVF *         |   |      |     |     |     |     |     |     |     |     |     |
| Spare embryos | N | 225  | 245 | 217 | 223 | 200 | 230 | 254 | 210 | 213 | 203 |
|               | % | 20 % | 22% | 20% | 20% | 18% | 21% | 23% | 19% | 19% | 18% |

\*Female Only

### Q18 Would you agree to donate the following samples specifically for medical research?

|                                                  |   | Unweighted |          |          |         |            | Weighted |          |          |         |            |
|--------------------------------------------------|---|------------|----------|----------|---------|------------|----------|----------|----------|---------|------------|
|                                                  |   | Def yes    | Prob yes | Prob not | Def not | Don't know | Def yes  | Prob yes | Prob not | Def not | Don't know |
| Saliva                                           | N | 568        | 423      | 54       | 30      | 35         | 581      | 413      | 55       | 27      | 34         |
|                                                  | % | 51 %       | 38%      | 5%       | 3%      | 3%         | 52%      | 37%      | 5%       | 2%      | 3%         |
| Urine                                            | N | 553        | 432      | 61       | 33      | 31         | 566      | 424      | 60       | 30      | 30         |
|                                                  | % | 50 %       | 39%      | 5%       | 3%      | 3%         | 51%      | 38%      | 5%       | 3%      | 3%         |
| Blood                                            | N | 455        | 448      | 118      | 47      | 42         | 496      | 446      | 107      | 46      | 42         |
|                                                  | % | 41 %       | 40%      | 11%      | 4%      | 4%         | 42%      | 40%      | 10%      | 4%      | 4%         |
| Tissue collected requiring a local anaesthetic   | N | 273        | 463      | 197      | 100     | 77         | 283      | 471      | 190      | 88      | 78         |
|                                                  | % | 25 %       | 42%      | 18%      | 9%      | 7%         | 26%      | 42%      | 17%      | 8%      | 7%         |
| Tissue collected requiring a general anaesthetic | N | 166        | 286      | 310      | 235     | 113        | 172      | 300      | 309      | 214     | 115        |
|                                                  | % | 15 %       | 26%      | 28%      | 21%     | 10%        | 16%      | 27%      | 28%      | 19%     | 10%        |
| Sperm *                                          | N | 120        | 171      | 104      | 66      | 43         | 135      | 188      | 111      | 64      | 46         |
|                                                  | % | 24 %       | 34%      | 21%      | 13%     | 9%         | 25%      | 35%      | 20%      | 12%     | 9%         |

\*Men only

## Appendix VI

## Results of survey –unweighted and weighted

| Q19 In the event of your death, would you be willing to donate the following samples for medical research? |   |            |          |          |         |            |          |          |          |         |            |  |
|------------------------------------------------------------------------------------------------------------|---|------------|----------|----------|---------|------------|----------|----------|----------|---------|------------|--|
|                                                                                                            |   | Unweighted |          |          |         |            | Weighted |          |          |         |            |  |
|                                                                                                            |   | Def yes    | Prob yes | Prob not | Def not | Don't know | Def yes  | Prob yes | Prob not | Def not | Don't know |  |
| A small sample of your liver                                                                               | N | 485        | 390      | 88       | 51      | 96         | 491      | 391      | 84       | 48      | 96         |  |
|                                                                                                            | % | 44 %       | 35%      | 8%       | 5%      | 9%         | 44%      | 35%      | 8%       | 4%      | 9%         |  |
| A small sample of your brain                                                                               | N | 429        | 304      | 166      | 96      | 115        | 438      | 305      | 158      | 94      | 116        |  |
|                                                                                                            | % | 39 %       | 27%      | 15%      | 9%      | 10%        | 39%      | 27%      | 14%      | 8%      | 10%        |  |
| A whole liver                                                                                              | N | 430        | 319      | 158      | 87      | 116        | 438      | 316      | 154      | 84      | 118        |  |
|                                                                                                            | % | 39 %       | 29%      | 14%      | 8%      | 10%        | 39%      | 28%      | 14%      | 8%      | 11%        |  |
| A whole brain                                                                                              | N | 353        | 234      | 221      | 150     | 152        | 360      | 236      | 214      | 145     | 155        |  |
|                                                                                                            | % | 32 %       | 21%      | 20%      | 14%     | 14%        | 32%      | 21%      | 19%      | 13%     | 14%        |  |

| Q20 You are having surgery for a health issue which requires a general anaesthetic. The surgeon asks you whether you would be willing to consent to any additional tissue? |   |            |          |          |         |            |          |          |          |         |            |  |
|----------------------------------------------------------------------------------------------------------------------------------------------------------------------------|---|------------|----------|----------|---------|------------|----------|----------|----------|---------|------------|--|
|                                                                                                                                                                            |   | Unweighted |          |          |         |            | Weighted |          |          |         |            |  |
|                                                                                                                                                                            |   | Def yes    | Prob yes | Prob not | Def not | Don't know | Def yes  | Prob yes | Prob not | Def not | Don't know |  |
| From the same part of the body                                                                                                                                             | N | 328        | 530      | 115      | 51      | 86         | 342      | 523      | 112      | 50      | 83         |  |
|                                                                                                                                                                            | % | 30 %       | 48%      | 10%      | 5%      | 8%         | 31%      | 47%      | 10%      | 5%      | 7%         |  |
| Samples taken from an area close by                                                                                                                                        | N | 219        | 481      | 212      | 89      | 109        | 229      | 490      | 206      | 81      | 104        |  |
|                                                                                                                                                                            | % | 20 %       | 43%      | 19%      | 8%      | 10%        | 21%      | 44%      | 19%      | 7%      | 9%         |  |
| Samples involving an                                                                                                                                                       | N | 154        | 336      | 298      | 204     | 118        | 164      | 348      | 301      | 180     | 118        |  |
|                                                                                                                                                                            | % | 14 %       | 30%      | 27%      | 18%     | 11%        | 15%      | 31%      | 27%      | 16%     | 11%        |  |

## Appendix VI

## Results of survey –unweighted and weighted

|                         |  |  |  |  |  |  |  |  |  |  |  |  |
|-------------------------|--|--|--|--|--|--|--|--|--|--|--|--|
| additional<br>procedure |  |  |  |  |  |  |  |  |  |  |  |  |
|-------------------------|--|--|--|--|--|--|--|--|--|--|--|--|

| Q21 You are having surgery for a health issue which requires a general anaesthetic. The surgeon asks you whether you would be willing to consent to any additional tissue? |   |            |          |          |         |            |          |          |          |         |            |  |
|----------------------------------------------------------------------------------------------------------------------------------------------------------------------------|---|------------|----------|----------|---------|------------|----------|----------|----------|---------|------------|--|
|                                                                                                                                                                            |   | Unweighted |          |          |         |            | Weighted |          |          |         |            |  |
|                                                                                                                                                                            |   | Def yes    | Prob yes | Prob not | Def not | Don't know | Def yes  | Prob yes | Prob not | Def not | Don't know |  |
| Understanding how our body fights disease                                                                                                                                  | N | 390        | 558      | 72       | 27      | 63         | 399      | 554      | 71       | 24      | 62         |  |
|                                                                                                                                                                            | % | 35 %       | 50%      | 6%       | 2%      | 6%         | 36%      | 50%      | 6%       | 2%      | 6%         |  |
| Understanding how our genetic makeup...                                                                                                                                    | N | 305        | 558      | 115      | 47      | 85         | 312      | 564      | 107      | 43      | 83         |  |
|                                                                                                                                                                            | % | 27 %       | 50%      | 10%      | 4%      | 8%         | 28%      | 51%      | 10%      | 4%      | 8%         |  |
| Research that is testing new treatments                                                                                                                                    | N | 318        | 511      | 132      | 52      | 97         | 325      | 502      | 133      | 50      | 99         |  |
|                                                                                                                                                                            | % | 29 %       | 46%      | 12%      | 5%      | 9%         | 29%      | 45%      | 12%      | 5%      | 9%         |  |
| Research involving cells from embryos                                                                                                                                      | N | 157        | 304      | 228      | 214     | 207        | 167      | 319      | 225      | 199     | 200        |  |
|                                                                                                                                                                            | % | 14 %       | 27%      | 21%      | 19%     | 19%        | 15%      | 29%      | 20%      | 18%     | 18%        |  |
| Research involving animals                                                                                                                                                 | N | 107        | 270      | 281      | 318     | 134        | 117      | 285      | 271      | 304     | 132        |  |
|                                                                                                                                                                            | % | 10%        | 24%      | 25%      | 29%     | 12%        | 11%      | 26%      | 24%      | 27%     | 12%        |  |
| Research outside the UK                                                                                                                                                    | N | 109        | 273      | 350      | 199     | 179        | 115      | 277      | 349      | 199     | 170        |  |
|                                                                                                                                                                            | % | 10 %       | 25%      | 32%      | 18%     | 16%        | 10%      | 25%      | 31%      | 18%     | 15%        |  |

## Appendix VI

## Results of survey –unweighted and weighted

| Q22 Would you be willing to donate samples to be used by the following organisations? |   |            |          |          |         |            |          |          |          |         |            |
|---------------------------------------------------------------------------------------|---|------------|----------|----------|---------|------------|----------|----------|----------|---------|------------|
|                                                                                       |   | Unweighted |          |          |         |            | Weighted |          |          |         |            |
|                                                                                       |   | Def yes    | Prob yes | Prob not | Def not | Don't know | Def yes  | Prob yes | Prob not | Def not | Don't know |
| NHS Hospitals                                                                         | N | 367        | 570      | 69       | 31      | 73         | 379      | 569      | 65       | 28      | 70         |
|                                                                                       | % | 33 %       | 51%      | 6%       | 3%      | 7%         | 34%      | 51%      | 6%       | 2%      | 6%         |
| Universities                                                                          | N | 243        | 515      | 185      | 56      | 111        | 255      | 519      | 173      | 54      | 108        |
|                                                                                       | % | 22 %       | 46%      | 17%      | 5%      | 10%        | 23%      | 47%      | 16%      | 5%      | 10%        |
| Medical Research Charities                                                            | N | 307        | 563      | 107      | 41      | 92         | 311      | 561      | 108      | 39      | 91         |
|                                                                                       | % | 28 %       | 51%      | 10%      | 4%      | 8%         | 28%      | 51%      | 10%      | 4%      | 8%         |
| Pharmaceutical Companies                                                              | N | 138        | 487      | 233      | 93      | 159        | 139      | 490      | 227      | 95      | 161        |
|                                                                                       | % | 12 %       | 44%      | 21%      | 8%      | 14%        | 12%      | 44%      | 20%      | 9%      | 14%        |
| Diagnostic Companies                                                                  | N | 187        | 515      | 180      | 74      | 154        | 182      | 511      | 183      | 74      | 159        |
|                                                                                       | % | 17 %       | 46%      | 16%      | 7%      | 14%        | 16%      | 46%      | 17%      | 7%      | 14%        |

**Q23 How important do you think it is that you are first asked for your permission (often known as 'consent') for any leftover samples to be used for medical research?**

|                        | Unweighted |      | Weighted |     |
|------------------------|------------|------|----------|-----|
|                        | N          | %    | N        | %   |
| 1 Not at all important | 40         | 4 %  | 42       | 4%  |
| 2                      | 41         | 4 %  | 43       | 4%  |
| 3                      | 104        | 9 %  | 103      | 9%  |
| 4                      | 274        | 25 % | 268      | 24% |
| 5 Extremely important  | 615        | 55 % | 614      | 55% |
| Don't know             | 36         | 3 %  | 40       | 4%  |

## Appendix VI

## Results of survey –unweighted and weighted

**Q24 How important do you think it is that you are first asked for your permission (often known as 'consent') for any leftover samples to be used for medical research?**

|               | Unweighted |      | Weighted |     |
|---------------|------------|------|----------|-----|
|               | N          | %    | N        | %   |
| Opt-in        | 605        | 55 % | 598      | 54% |
| Opt-out       | 308        | 28 % | 321      | 29% |
| No preference | 151        | 14 % | 146      | 13% |
| Don't know    | 46         | 4 %  | 45       | 4%  |

**Q25 Which of these three approaches do you prefer?**

|                           | Unweighted |      | Weighted |     |
|---------------------------|------------|------|----------|-----|
|                           | N          | %    | N        | %   |
| Consent every time        | 472        | 43 % | 480      | 43% |
| Consent once for life     | 231        | 21 % | 237      | 21% |
| Consent at certain points | 301        | 27 % | 298      | 27% |
| No preference             | 82         | 7 %  | 72       | 7%  |
| Don't know                | 24         | 2 %  | 22       | 2%  |

**Q26 If you were going to be asked to donate left over samples for medical research every time you had a medical procedure, would you rather this was discussed with you by a health professional before the medical procedure or afterwards?**

|               | Unweighted |      | Weighted |     |
|---------------|------------|------|----------|-----|
|               | N          | %    | N        | %   |
| Before        | 897        | 81 % | 908      | 82% |
| After         | 48         | 4 %  | 48       | 4%  |
| No preference | 151        | 14 % | 142      | 13% |
| Don't know    | 14         | 1 %  | 12       | 1%  |



## Appendix VI

## Results of survey –unweighted and weighted

**Q27 If a consent once for life system was in place, when would you prefer to be asked about consenting left over samples for medical research?**

|                                     | Unweighted |      | Weighted |     |
|-------------------------------------|------------|------|----------|-----|
|                                     | N          | %    | N        | %   |
| When registering at a GP surgery    | 425        | 39 % | 419      | 38% |
| During a routine GP appointment     | 386        | 35 % | 380      | 34% |
| When applying for a driving licence | 83         | 8 %  | 88       | 8%  |
| When applying for a passport        | 75         | 7 %  | 80       | 7%  |
| The first time I visit the hospital | 233        | 21 % | 228      | 21% |
| The first time I have a medical     | 513        | 47 % | 510      | 46% |

**Q28 If a consent once for life system was in place, when would you prefer to be asked about consenting left over samples for medical research?**

|                                            | Unweighted |      | Weighted |     |
|--------------------------------------------|------------|------|----------|-----|
|                                            | N          | %    | N        | %   |
| Face to face with a health professional    | 720        | 65 % | 727      | 65% |
| Letter                                     | 66         | 6 %  | 64       | 6%  |
| Email                                      | 30         | 3 %  | 32       | 3%  |
| Telephone                                  | 14         | 1 %  | 13       | 1%  |
| Via a website                              | 60         | 5 %  | 61       | 6%  |
| Completing a form and returning it by post | 161        | 15 % | 160      | 14% |
| Other (please specify)                     | 4          | 0 %  | 4        | 0%  |
| Don't know                                 | 55         | 5 %  | 49       | 4%  |

**Q29 If you later decided you didn't want your samples to be used for medical research, what would be your preferred way to withdraw that consent?**

|                                         | Unweighted |      | Weighted |     |
|-----------------------------------------|------------|------|----------|-----|
|                                         | N          | %    | N        | %   |
| Face to face with a health professional | 421        | 38 % | 424      | 38% |
| Letter                                  | 95         | 9 %  | 92       | 8%  |
| Email                                   | 89         | 8 %  | 93       | 8%  |
| Telephone                               | 56         | 5 %  | 51       | 5%  |
| Via a website                           | 137        | 12 % | 144      | 13% |

## Appendix VI

## Results of survey –unweighted and weighted

|                                            |     |      |     |     |
|--------------------------------------------|-----|------|-----|-----|
| Completing a form and returning it by post | 243 | 22 % | 244 | 22% |
| Other (please specify)                     | 8   | 1 %  | 6   | 1%  |
| Don't know                                 | 61  | 5 %  | 55  | 5%  |

### Q30 How likely would you be to donate samples for medical research using the following models of consent?

|                                      |   | Unweighted |          |          |         |            | Weighted |          |          |         |            |
|--------------------------------------|---|------------|----------|----------|---------|------------|----------|----------|----------|---------|------------|
|                                      |   | Def yes    | Prob yes | Prob not | Def not | Don't know | Def yes  | Prob yes | Prob not | Def not | Don't know |
| Generic                              | N | 216        | 528      | 163      | 64      | 139        | 228      | 538      | 154      | 52      | 38         |
|                                      | % | 19 %       | 48%      | 15%      | 6%      | 13%        | 21%      | 48%      | 14%      | 5%      | 12%        |
| Tiered                               | N | 242        | 549      | 125      | 55      | 139        | 244      | 560      | 124      | 49      | 133        |
|                                      | % | 22 %       | 49%      | 11%      | 5%      | 13%        | 22%      | 50%      | 11%      | 4%      | 12%        |
| Specific                             | N | 336        | 553      | 88       | 28      | 105        | 339      | 551      | 89       | 29      | 102        |
|                                      | % | 30 %       | 50%      | 8%       | 3%      | 9%         | 31%      | 50%      | 8%       | 3%      | 9%         |
| Specific consent for every new study | N | 293        | 560      | 110      | 27      | 120        | 300      | 560      | 109      | 26      | 115        |
|                                      | % | 26 %       | 50%      | 10%      | 2%      | 11%        | 27%      | 50%      | 10%      | 2%      | 10%        |

### Q31 Which of these four types of consent do you prefer?

| Preferences     | Generic    |     |          |     |
|-----------------|------------|-----|----------|-----|
|                 | Unweighted |     | Weighted |     |
|                 | N          | %   | N        | %   |
| 1 <sup>st</sup> | 200        | 18% | 207      | 19% |
| 2 <sup>nd</sup> | 159        | 14% | 163      | 15% |
| 3 <sup>rd</sup> | 168        | 15% | 168      | 15% |
| 4 <sup>th</sup> | 344        | 31% | 327      | 30% |
| Tiered          |            |     |          |     |
| 1 <sup>st</sup> | 156        | 14% | 152      | 14% |
| 2 <sup>nd</sup> | 246        | 22% | 252      | 23% |

## Appendix VI

## Results of survey –unweighted and weighted

|                              |     |     |     |     |
|------------------------------|-----|-----|-----|-----|
| 3 <sup>rd</sup>              | 360 | 32% | 355 | 32% |
| 4 <sup>th</sup>              | 105 | 10% | 106 | 10% |
| <b>Specific (once only)</b>  |     |     |     |     |
| 1 <sup>st</sup>              | 198 | 18% | 183 | 17% |
| 2 <sup>nd</sup>              | 306 | 28% | 304 | 27% |
| 3 <sup>rd</sup>              | 202 | 18% | 209 | 19% |
| 4 <sup>th</sup>              | 161 | 15% | 169 | 15% |
| <b>Specific (every time)</b> |     |     |     |     |
| 1 <sup>st</sup>              | 341 | 31% | 323 | 29% |
| 2 <sup>nd</sup>              | 157 | 14% | 146 | 13% |
| 3 <sup>rd</sup>              | 138 | 12% | 133 | 12% |
| 4 <sup>th</sup>              | 258 | 23% | 263 | 24% |
| Don't Know                   | 63  | 6%  | 62  | 6%  |
| No Preference                | 181 | 16% | 183 | 17% |

**Q32 If your preferred system of consent was not available, what would you do?**

|                                              | Unweighted |      | Weighted |     |
|----------------------------------------------|------------|------|----------|-----|
|                                              | N          | %    | N        | %   |
| I would agree to give generic consent        | 348        | 52 % | 350      | 53% |
| I would rather my sample was not used at all | 187        | 28 % | 172      | 26% |
| Don't know                                   | 133        | 20 % | 135      | 21% |

**Q33 If there was a sample that you considered to be sensitive, but were still willing to donate for medical research, which of the four types of consent would you prefer to give?**

|                              | Unweighted |      | Weighted |     |
|------------------------------|------------|------|----------|-----|
|                              | N          | %    | N        | %   |
| Generic Consent              | 131        | 12 % | 135      | 12% |
| Tiered Consent               | 105        | 9 %  | 101      | 9%  |
| Specific Consent - once only | 246        | 22 % | 228      | 21% |
| Consent for every new study  | 278        | 25 % | 288      | 26% |

## Appendix VI

## Results of survey –unweighted and weighted

|               |     |      |     |     |
|---------------|-----|------|-----|-----|
| No Preference | 206 | 19 % | 216 | 19% |
| Don't Know    | 144 | 13 % | 142 | 13% |

### Q34 Would you be willing to have your anonymised medical records linked to your sample?

|                | Unweighted |      | Weighted |     |
|----------------|------------|------|----------|-----|
|                | N          | %    | N        | %   |
| Definitely yes | 266        | 24 % | 279      | 25% |
| Probably yes   | 493        | 44 % | 497      | 45% |
| Probably not   | 165        | 15 % | 157      | 14% |
| Definitely not | 77         | 7 %  | 71       | 6%  |
| Don't know     | 109        | 10 % | 107      | 10% |

### Q35 Would you be willing to have your anonymised lifestyle information linked to your sample?

|                | Unweighted |      | Weighted |     |
|----------------|------------|------|----------|-----|
|                | N          | %    | N        | %   |
| Definitely yes | 377        | 34 % | 398      | 35% |
| Probably yes   | 530        | 48 % | 527      | 47% |
| Probably not   | 90         | 8 %  | 90       | 8%  |
| Definitely not | 48         | 4 %  | 43       | 4%  |
| Don't know     | 65         | 6 %  | 61       | 5%  |

### Q36 How would you like to get information on medical research including research on a particular condition that might use your sample?

|                                                   | Unweighted |      | Weighted |     |
|---------------------------------------------------|------------|------|----------|-----|
|                                                   | N          | %    | N        | %   |
| Website                                           | 295        | 27 % | 304      | 27% |
| Newsletter                                        | 104        | 9 %  | 97       | 9%  |
| Email                                             | 302        | 27 % | 315      | 28% |
| Letter                                            | 241        | 22 % | 228      | 21% |
| Would not be interested in additional information | 168        | 15 % | 166      | 15% |

## Appendix VI

Results of survey –unweighted and weighted

**Q37 Are there any particular organs you would not feel comfortable donating in the event of your death?**

|         | Unweighted |     | Weighted |     |
|---------|------------|-----|----------|-----|
|         | N          | %   | N        | %   |
| Brain   | 337        | 31% | 329      | 30% |
| Eyes    | 307        | 28% | 308      | 28% |
| Heart   | 128        | 12% | 121      | 11% |
| Kidneys | 60         | 5 % | 59       | 5%  |
| Liver   | 68         | 6 % | 65       | 6%  |
| Lungs   | 67         | 6%  | 63       | 6%  |

**Q38 If you were considering donating whole organs for medical research in the event of your death, are there any particular organs you would not feel comfortable donating?**

|                                                                                   | Unweighted |      | Weighted |     |
|-----------------------------------------------------------------------------------|------------|------|----------|-----|
|                                                                                   | N          | %    | N        | %   |
| Yes, I would donate an organ for research if it was not suitable for transplant   | 755        | 68 % | 766      | 69% |
| No, if they can't be used for transplant I would prefer they were not used at all | 125        | 11 % | 121      | 11% |
| I would not agree to donate an organ for transplant                               | 96         | 9 %  | 95       | 9%  |
| Don't know                                                                        | 134        | 12 % | 128      | 12% |

## Appendix VI

Results of survey –unweighted and weighted

| Q40 Would you be willing to have your anonymised lifestyle information linked to your sample?                        |            |      |            |      |          |      |
|----------------------------------------------------------------------------------------------------------------------|------------|------|------------|------|----------|------|
|                                                                                                                      | Unweighted |      | Unweighted |      | Weighted |      |
|                                                                                                                      | N          | %    | N          | %    | N        | %    |
| Yes                                                                                                                  | 174        | 16 % | 166        | 15 % | 166      | 15 % |
| No                                                                                                                   | 789        | 77 % | 580        | 52 % | 800      | 72 % |
| Don't know                                                                                                           | 147        | 13 % | 144        | 13 % | 144      | 13 % |
| It should be obtained at the same time as consent for organ transplantation and recorded on the organ donor register |            |      | 270        | 24 % | 267      | 24 % |
| It should be discussed at a GP appointment and recorded in the patients' notes                                       |            |      | 140        | 13 % | 143      | 13 % |
| Other                                                                                                                |            |      | 13         | 1 %  | 14       | 1 %  |
| Don't know                                                                                                           |            |      | 107        | 10 % | 108      | 10 % |

Note: percentages may not add up to 100% due to rounding.



**Consent for the use of human biological samples for  
biomedical research – a mixed methods study exploring the  
UK public's preferences**

|                                    |                                                                                                                                                                                                                                                                                                                                                                                                                                                         |
|------------------------------------|---------------------------------------------------------------------------------------------------------------------------------------------------------------------------------------------------------------------------------------------------------------------------------------------------------------------------------------------------------------------------------------------------------------------------------------------------------|
| Journal:                           | <i>BMJ Open</i>                                                                                                                                                                                                                                                                                                                                                                                                                                         |
| Manuscript ID:                     | bmjopen-2013-003022.R1                                                                                                                                                                                                                                                                                                                                                                                                                                  |
| Article Type:                      | Research                                                                                                                                                                                                                                                                                                                                                                                                                                                |
| Date Submitted by the Author:      | 28-May-2013                                                                                                                                                                                                                                                                                                                                                                                                                                             |
| Complete List of Authors:          | Lewis, Celine; Genetic Alliance UK, Unit 4D Leroy House<br>Clotworthy, Margaret; Human Focused Testing,<br>Hilton, Shona; Medical Research Council, CSO Social & Public Health<br>Sciences Unit<br>Magee, Caroline; National Cancer Research Institute, Confederation of<br>Cancer Biobanks<br>Robertson, Mark; AstraZeneca, Science Policy & Relations<br>Stubbins, Lesley; GlaxoSmithKline, Medicines Research Centre<br>Corfield, Jule; Areteva Ltd, |
| <b>Primary Subject<br>Heading</b>: | Public health                                                                                                                                                                                                                                                                                                                                                                                                                                           |
| Secondary Subject Heading:         | Ethics, Genetics and genomics, Health policy                                                                                                                                                                                                                                                                                                                                                                                                            |
| Keywords:                          | GENETICS, Health policy < HEALTH SERVICES ADMINISTRATION &<br>MANAGEMENT, PUBLIC HEALTH, MEDICAL ETHICS                                                                                                                                                                                                                                                                                                                                                 |
|                                    |                                                                                                                                                                                                                                                                                                                                                                                                                                                         |

SCHOLARONE™  
Manuscripts

only

**Consent for the use of human biological samples for biomedical research – a mixed methods study exploring the UK public’s preferences**

Celine Lewis<sup>1</sup>, Margaret Clotworthy<sup>2</sup>, Shona Hilton<sup>3</sup>, Caroline Magee<sup>4</sup>, Mark J Robertson<sup>5</sup>, Lesley J Stubbins<sup>6</sup>, Julie Corfield<sup>7</sup>

<sup>1</sup>Genetic Alliance UK, Unit 4D Leroy House, 436 Essex Road, London, N1 3LY, UK

<sup>2</sup>Human Focused Testing, 50 the Barns, Littleport, Cambridge, CB6 1GG, UK

<sup>3</sup>Medical Research Council/CSO Social & Public Health Sciences Unit, 4 Lilybank Gardens, Glasgow, G12 8RZ, UK

<sup>4</sup>Confederation of Cancer Biobanks, National Cancer Research Institute, Angel Building, 407 St John Street, London EC1V 4AD, UK

<sup>5</sup>AstraZeneca, Science Policy & Relations, 11G43 Mereside, Alderley Park, Macclesfield, Cheshire SK10 4TF, UK

<sup>6</sup>GlaxoSmithKline Medicines Research Centre, Gunnels Wood Road, Stevenage, Hertfordshire, SG1 2NY, UK

<sup>7</sup>Areteva Ltd, BioCity, Nottingham, NG1 1GF, UK

**Running title:** Consent for the use of biosamples - the UK public's preferences

**Correspondence to:**

Dr Celine Lewis

Genetic Alliance UK,

Unit 4D Leroy House,

436 Essex Road,

London,

N1 3QP

**Email:** celine@geneticalliance.org.uk

**Keywords:** consent, biobanking, public views, public preferences, biomedical research

**Word count:** 5306



**ABSTRACT**

**Objective:** A mixed methods study exploring the UK general public's views towards consent for the use of biosamples for biomedical research.

**Setting:** Cross-sectional population-based focus groups followed by an online survey.

**Participants:** Twelve focus groups (81 participants) selectively sampled to reflect a range of demographic groups; 1110 survey responders recruited through a stratified sampling method with quotas set on sex, age, geographical location, socio-economic group and ethnicity.

**Main outcome measures:** 1) Views on the importance of consent when donating residual biosamples for medical research; 2) preferences for opt-in or opt-out consent approaches; 3) preferences for different consent models.

**Results:** Participants believed obtaining consent for use of residual biosamples was important as it was "morally correct" to ask, and enabled people to make an active choice and retain control over their biosamples. Survey responders preferred opt-in consent (55%); the strongest predictor was being from a low socio-economic group (OR 2.22, 95% CI 1.41-3.57,  $p=0.001$ ) and having a religious affiliation (OR 1.36, 95% CI 1.01-1.81,  $p=0.04$ ). Focus group participants had a slight preference for opt-out consent because by using this approach more biosamples would be available and facilitate research. Concerning preferred models of consent for research use of biosamples, survey responders preferred specific consent with re-contact for each study for which their biosamples are eligible. Focus group participants preferred generic consent as it provided "flexibility for researchers" and reduced the likelihood that biosamples would be wasted. The strongest predictor for preferring specific consent was preferring opt-in consent (OR 4.58, 95% CI 3.30-6.35,  $p=0.015$ ) followed by non-'White' ethnicity (OR 2.94, 95% CI 1.23-7.14,  $p<0.001$ ).

**Conclusions:** There is a preference amongst the UK public for ongoing choice and control over donated biosamples, however increased knowledge and opportunity for discussion is associated with acceptance of less restrictive consent models for some people.

## ARTICLE SUMMARY

### Article focus

- To explore views of the UK public on the importance of consent being sought to the use of residual biosamples for medical research;
- The publics' preferences for opt-in or opt-out approaches to consent;
- The publics' preferences for generic, tiered or specific consent.

### Key messages

- Obtaining consent for the use of residual biosamples for biomedical research was perceived as important by members of the general public.
- Survey participants exhibited a desire to retain active choice and control when donating biosamples and over the uses to which their biosamples might be put, preferring an opt-in system and specific consent, however these results differ from those reported during focus group discussions, where preference was for less restrictive consent models (an opt-out system and generic consent) that are likely to increase availability of biosamples.
- These differences might be accounted for by the fact that focus group participants were given more background information about the use of residual biosamples in research and had time to consider the benefits and disadvantages of the different approaches.

### Strengths and limitations of this study

- This study contributes further to our understanding of the UK public's views and preferences towards consent for the use of biosamples in medical research. Our study supports the premise that increased knowledge and opportunity for discussion is associated with acceptance of less restrictive consent models.
- Due to the hypothetical nature of the study, the findings may not necessarily correlate with actual behaviour.

## INTRODUCTION

Human biological samples (biosamples), including organs, tissues, biofluids such as blood, and their derivatives, are increasingly important resources for biomedical research[1,2]. For example, they can help us to understand how we diagnose, categorise and treat a whole variety of medical conditions including cancer[1] and are particularly important when studying rare diseases or conditions where biosamples are hard to obtain. Biosamples are donated by either healthy volunteers or patients, either through specific research studies or as residual tissues or biofluids surplus to diagnostic requirements, or post mortem. Biosamples can be used fresh or can be first stored in a biobank, a collection of biosamples often linked with the donors' clinical and demographic information, as biosample attributes. Here, the quality of the data linked to the biosample is as important as the quality of the biosamples themselves, providing essential context within which to design analyses and interpret results or carry our further experimental studies. Clinical data may also be enriched with lifestyle and environmental information[3].

It is widely accepted that that donor consent should be sought and obtained before biosamples can be used in research[4,5]. Consent in research ethics relates to ensuring respect for the autonomy and dignity of the donors (research participants) and protecting them from abuse[5] and In fact, in England, Wales and Northern Ireland, the Human Tissue Act establishes donor consent as the baseline principle for the retention and use of organs and tissue for purposes beyond diagnosis and treatment, although further statutory consent exemptions do exist in certain circumstances, notably use of anonymised tissue from the living for research ethics committee (REC) approved research projects[6]. The value of biobanks, in supporting broad, long-term research purposes, means that the model of the consent process needs to be considered in order to ensure that it is valid and appropriate. A number of different consent frameworks which address consent scope and process have been proposed as a result[5]. However, there is continued debate as to which is the most appropriate in various situations[4,7,8].

Both the Human Tissue Authority[9] and National Research Ethics Service[10] recommend generic consent (Table 1), a view that has also been endorsed by UK research funders[11] and the Nuffield Council on Bioethics[12]. One commonly cited criticism of generic consent is that it is not sufficiently 'informed' as future research uses are not known at the time of donation[13]. Empirical research examining public and patient preferences has highlighted that there is no clear consensus on the issue, with

specific consent being identified as the most favoured form of consent in some studies[14,15], and generic consent in others[16-18].

Table 1: Approaches to consent of biosamples

| <b>Initial consent methods</b>                |                                                                                                                                                                                                                                                                                                               |
|-----------------------------------------------|---------------------------------------------------------------------------------------------------------------------------------------------------------------------------------------------------------------------------------------------------------------------------------------------------------------|
| Opt-in consent                                | The storage and use of biosamples for research on the basis that the donor has actively agreed to do so.                                                                                                                                                                                                      |
| Opt-out consent                               | The storage and use of samples for research on the basis that the donor has not objected, after previously being given the opportunity to do so.                                                                                                                                                              |
| <b>Opt-in consent methods</b>                 |                                                                                                                                                                                                                                                                                                               |
| Consent once for life                         | Consent is provided once for life for use of any residual samples for research with the option of withdrawing permission at a later stage if the donor wishes to do so.                                                                                                                                       |
| Consent at certain points                     | Consent is provided at certain points for use of residual biosamples for research, e.g. every 10 years or at the beginning of a particular episode of care.                                                                                                                                                   |
| Consent every time                            | Consent is requested every time residual biosamples may become available for use in research.                                                                                                                                                                                                                 |
| <b>Consent for research use of biosamples</b> |                                                                                                                                                                                                                                                                                                               |
| Generic consent                               | Consent to the use of donated samples for a range of unknown uses, on the basis of general information about those possible uses and about the governance arrangements in place. Also referred to as 'broad' or 'blanket' consent.                                                                            |
| Tiered consent                                | A more restricted form of consent for use of samples, where the donor is invited to agree to the use of their samples in unknown projects, but given the option of specifying particular categories of research that they wish to exclude e.g. embryonic research. Also referred to as 'categorical' consent. |
| Specific consent –once only                   | Consent to the use of donated samples for a specified study only, on the basis of information provided about that study. Any residual sample will be discarded at the end of that study.                                                                                                                      |
| Specific consent – for every new study        | Consent to the use of donated samples for a specified study, on the basis of information provided about that study. However, participants are re-contacted and asked to consider participating in every new study for which their biosamples are eligible.                                                    |

Note: Consent terms were selected based on common usage within the UK biobanking system (for example, generic consent is the term used by the Human Tissue Authority, National Research Ethics Service, and National Cancer Research Institute) and definitions chosen in consultation with a team of representatives from universities, hospital biobank staff, pathologists and industry.

1  
2  
3 The 2011 Nuffield Council report on donation of human material for medicine and  
4 research also recommends that research funders should work to increase public  
5 awareness of the key role of donated tissue in scientific and clinical research[12]. Public  
6 trust and confidence in the consent process is of paramount importance to maintain and  
7 increase public support for donation and use of biosamples for biomedical research in the  
8 UK. For this reason, it is important to understand and inform public opinion to ensure  
9 consent models are aligned to public expectations and preferences. Whilst numerous  
10 international studies have been conducted which focus on consent preferences, research  
11 conducted in the UK has tended to focus on large scale population biobanks, such as UK  
12 Biobank[19] or Generation Scotland[20], which require ongoing contact with donors, or  
13 on the views of patients on the donation of residual biosamples[21]. The current study  
14 was conducted to broaden our understanding of the UK public's views on biosample  
15 donation for biomedical research. Moreover, the findings are intended to inform a  
16 biobanking policy for STRATUM (Strategic Tissue Repository Alliance Through Unified  
17 Methods), a Technology Strategy Board<sup>i</sup> and pharmaceutical industry-funded project  
18 seeking to address the problem of insufficient numbers of biosamples and associated  
19 clinical data of adequate quality to fully support biomedical research in the UK.  
20  
21

22  
23  
24  
25  
26  
27  
28  
29 The specific aims of this study were to 1) identify participants' views on the importance  
30 of consent when donating residual biosamples for medical research; 2) explore  
31 preferences for opt-in or opt-out approaches to consent; and 3) explore preferences for  
32 different consent models (Table 1). Public willingness to donate biosamples, views on  
33 donation of different biosample types, and conditions of their use (by which  
34 organisations and for which types of research) are reported elsewhere (Public views on  
35 the donation and use of human biological samples in biomedical research – a mixed  
36 methods study, 2013, unpublished manuscript).  
37  
38  
39

## 40 41 **METHODS**

42  
43 This was a mixed methods study comprising qualitative focus groups and a quantitative  
44 on-line survey. Ethical approval for the study was granted by the University of  
45 Manchester Research Ethics Committee in April 2012.  
46  
47

### 48 49 **Focus groups**

50  
51  
52 Twelve focus groups (including one pilot group) were conducted between May and July  
53 2012 in six different geographic locations across the UK. Participants were recruited  
54 face-to-face in the street by a market research company The Focus Group. Participants  
55  
56

---

57  
58 <sup>i</sup> under the Stratified Medicines Programme: Business Models Value Systems  
59  
60

1  
2  
3 were purposively sampled; each group chosen to reflect a particular demographic (age,  
4 socio-economic group (SEG), ethnicity) in order to gather a wide spectrum of views and  
5 enable comparisons across groups. Two 'patient' groups were also included, comprising  
6 people who had had an operation in the past two years requiring an overnight hospital  
7 stay, and people who currently have, or have had, either a serious or chronic illness, or  
8 disability. The latter group comprised people diagnosed with diabetes, cancer, heart  
9 disease, asthma and the genetic condition Marfan syndrome. A further group consisted  
10 of generally healthy volunteers who had donated a biosample specifically for research  
11 purposes.  
12  
13  
14  
15

16  
17  
18 Before agreeing to take part, potential participants were given a participant information  
19 sheet telling them about the study (see supplementary data file Appendix I). Those that  
20 were interested were screened through a questionnaire containing demographic  
21 questions to assess their suitability for a particular focus group. These were held in  
22 'neutral' locations such as hotel conference rooms or church halls and facilitated by an  
23 experienced facilitator (CL). Before each group discussion, participants were sent a short  
24 information leaflet about the use of biosamples in biomedical research to provide some  
25 background context for the discussion and to prompt them to think about the key issues  
26 (see supplementary data file Appendix II). This information was written by a core team  
27 of authors drawn from across academia and industry, including patient representation. It  
28 was reviewed by three members of the patient organisation Genetic Alliance UK as well  
29 as the science communication charity Sense about Science to ensure readability and  
30 non-bias. Before focus group discussions began, participants were asked to sign a  
31 consent form. Each participant received £50 for taking part to cover time and travel  
32 costs. Focus groups lasted 90 minutes and digital audio recordings were taken.  
33  
34  
35  
36  
37  
38  
39

40  
41 A detailed discussion guide was developed to explore participant views and preferences  
42 towards consent scope and process (see supplementary data file Appendix III). The main  
43 focus related to the use of biosamples surplus to diagnostic requirements following  
44 surgery or a medical procedure. Questions were informed by other empirical studies of  
45 consent in biobanking[16,22], developed by the authors, and addressed the topics  
46 described above. To enhance understanding around the different consent models,  
47 participants were given a sheet presenting three different scenarios, each of which  
48 elaborated on one of the three consent models chosen for discussion (see supplementary  
49 data file Appendix III,p.4). For each topic, discussion began by asking the group to  
50 consider the benefits and disadvantages of each particular approach. Once no new  
51 themes were emerging, each participant was asked to complete an accompanying  
52 anonymous questionnaire which asked them to select their preferred consent model. The  
53  
54  
55  
56  
57  
58  
59  
60

1  
2  
3 discussion guide, scenario sheet and questionnaire were piloted at the first focus group  
4 which resulted in some minor amendments to wording.  
5

6  
7 Recordings were fully transcribed and transcriptions checked. The software package  
8 Nvivo version 9 (QSR International, Pty Ltd) was used to help organise the data for  
9 analysis. This comprised grouping responses to questions into broad thematic categories  
10 which were then refined through sub-codes. Coding of all 12 transcripts was conducted  
11 by CL. The first six transcripts to be coded were also independently coded by a second  
12 researcher (SR). Codes were then compared to assess consistency of coding and ensure  
13 inter-rater reliability. Any discrepancies were discussed until consensus was reached.  
14 The remainder of the transcripts were then coded according to the agreed coding  
15 framework. **Survey**  
16  
17  
18  
19

20  
21 Once data analysis had been conducted on the focus group transcripts, the findings were  
22 used to inform development of a quantitative survey which was used to canvas public  
23 opinion on the issues of interest across a representative sample of the UK population  
24 (see supplementary data file Appendix IV). The survey was carried out by the market  
25 research company Research Now using their online panel community of UK residents. A  
26 stratified sampling method was used: quotas were set on sex, age, geographical  
27 location, SEG and ethnicity, in line with data provided by the Office of National Statistics  
28 (ONS) to ensure the sample was as representative of the UK population as possible.  
29 Within each category, a random sample was selected from the Research Now database  
30 containing 451,185 active respondents. We aimed to recruit 1,000 responders in total.  
31 The sample size required depends on the number of predictors, the expected effect size  
32 and the level of power. According to Miles and Shevlin [23], if we are expecting a small  
33 effect size, a sample size of 600 is considered adequate to achieve a high level of power  
34 of 0.8 (a benchmark suggested by Cohen [24]) for four predictors. As highlighted in  
35 Table 2 we can formulate at least four hypothesis, for example, *people from a higher  
36 socio-economic group are more likely to donate biosamples than those from lower socio-  
37 economic group*. With a sample size of 1,000, this study would provide highly reliable  
38 results. In order to reduce any on-line bias in our sample, 100 face-to-face interviews  
39 with non-internet users were conducted. An additional 'boost' sample of 100 people (not  
40 included in the main sample analysis) was also conducted with people from three  
41 minority ethnic groups ('Black', 'Chinese', 'S. Asian') so that we could conduct sub-group  
42 analysis between the groups.  
43  
44  
45  
46  
47  
48  
49  
50  
51  
52

53  
54 The survey questions were developed by the authors and piloted with 60 members of  
55 Research Now's online panel community who were from low SEG's. Members of the pilot  
56 group were then invited to take part in a subsequent telephone interview asking about  
57  
58  
59  
60



the survey. Interviews were conducted with 25 pilot survey responders. Questions focused on question clarity, survey length and whether responders felt the survey to be neutral. Some minor amendments to wording were made in light of the responses. The main survey was then conducted in September 2012. Surveys recorded online took, on average, 17 minutes to complete and each responder received a small payment (around £2) from Research Now.

Survey data were organised and analysed using SPSS statistical software version 20 (Chicago, IL: SPSS Inc; 2011). Initial univariate descriptive statistics were obtained for the entire study. Pearson Chi-square was used to examine demographic factors associated with willingness to donate and preference for different consent models. Those associations that were found to be significant ( $p \leq 0.05$ ) were then entered into a multiple logistic regression to explore the predictivity of these variables. Before running the model, we tested for multicollinearity among the independent variables. No multicollinearity issues were found.

## RESULTS

### Study populations

Participant characteristics are detailed in Table 2.

Table 2: Participant characteristics

| Characteristic              | Focus group<br>N=81 | Survey<br>N=1110 |
|-----------------------------|---------------------|------------------|
| <b>Gender</b>               |                     |                  |
| Male                        | 33; 41%             | 504; 45%         |
| Female                      | 48; 59%             | 606; 55%         |
| <b>Age</b>                  |                     |                  |
| 18-24                       | 13; 16%             | 135; 12%         |
| 25-34                       | 18; 22%             | 184; 17%         |
| 35-44                       | 19; 23%             | 198; 18%         |
| 45-54                       | 10; 12%             | 184; 17%         |
| 55-64                       | 16; 20%             | 176; 16%         |
| 65+                         | 5; 6%               | 233; 21%         |
| <b>Socio-economic group</b> |                     |                  |
| A                           | 9; 11%              | 41; 4%           |
| B                           | 22; 27%             | 215; 19%         |
| C1                          | 24; 30%             | 311; 28%         |
| C2                          | 14; 17%             | 233; 21%         |
| D                           | 6; 7%               | 145; 13%         |
| E                           | 6; 7%               | 165; 15%         |
| <b>Region</b>               |                     |                  |
| East of England             | 7; 7%               | 92; 8%           |
| East Midlands               | -                   | 57; 5%           |
| London                      | 18; 22%             | 213; 19%         |
| North East                  | -                   | 40; 4%           |
| North West                  | -                   | 121; 11%         |



|                       |         |          |
|-----------------------|---------|----------|
| Northern Ireland      | -       | 30; 3%   |
| Scotland              | 14; 17% | 76; 7%   |
| South East            | 14; 17% | 165; 15% |
| South West            | -       | 81; 7%   |
| Wales                 | -       | 51; 5%   |
| West Midlands         | 14; 17% | 94; 8%   |
| Yorkshire/Humberlands | 14; 17% | 90; 8%   |

**Ethnicity**

|                            |         |           |
|----------------------------|---------|-----------|
| White or White British     | 54; 67% | 1057; 95% |
| Mixed race                 | 1; 1%   | 7; 1%     |
| Asian or Asian British     | 10; 12% | 18; 2%    |
| Black or Black British     | 9; 11%  | 19; 2%    |
| Chinese or Chinese British | 7; 9%   | 2; 0%     |
| Other ethnic group         | 0; 0%   | 4; 0%     |
| Prefer not to say          | 0; 0%   | 3; 0%     |

**Religion**

|                   |  |          |
|-------------------|--|----------|
| Christianity      |  | 677; 61% |
| Islam             |  | 13; 1%   |
| Hinduism          |  | 6; 1%    |
| Sikhism           |  | 0; 0%    |
| Judaism           |  | 6; 1%    |
| Buddhism          |  | 11; 1%   |
| Other religion    |  | 15; 1%   |
| No religion       |  | 370; 33% |
| Prefer not to say |  | 12; 1%   |

**Religiosity**

|                      |  |          |
|----------------------|--|----------|
| Not at all religious |  | 234; 32% |
| Moderately religious |  | 422; 58% |
| Very religious       |  | 64; 9%   |
| Prefer not to say    |  | 8; 1%    |

**Education**

|                                                      |         |          |
|------------------------------------------------------|---------|----------|
| No formal qualification                              | 15; 19% | 70; 6%   |
| GCSE, O level, Scottish Standard Grade or equivalent | 19; 23% | 264; 24% |
| GCE, A-level, Scottish Higher or similar             | 17; 21% | 214; 19% |
| Vocational (BTEC/NVQ/Diploma)                        | -       | 230; 21% |
| Degree level or above                                | 30; 37% | 317; 29% |
| Prefer not to say                                    | -       | 15; 1%   |

**Self reported knowledge of medical research process**

|                |  |          |
|----------------|--|----------|
| No knowledge   |  | 463; 42% |
| Some knowledge |  | 603; 54% |
| Good knowledge |  | 44; 4%   |

**Have you been affected by a disability or illness?**

|     |  |          |
|-----|--|----------|
| Yes |  | 399; 36% |
| No  |  | 711; 64% |

**Has a close family member been affected by a disability or illness?**

|     |  |          |
|-----|--|----------|
| Yes |  | 767; 69% |
| No  |  | 343; 31% |

**Have you had blood or tissue removed during a medical procedure?**

|     |  |          |
|-----|--|----------|
| Yes |  | 446; 40% |
| No  |  | 553; 50% |

|                                                                                 |  |          |
|---------------------------------------------------------------------------------|--|----------|
| Don't know                                                                      |  | 111; 10% |
| <b>Have you ever been asked to donate blood or tissue for medical research?</b> |  |          |
| Yes                                                                             |  | 182; 16% |
| No                                                                              |  | 904; 81% |
| Don't know                                                                      |  | 24; 2%   |
| <b>If so, did you agree to donate?</b>                                          |  |          |
| Yes                                                                             |  | 155; 85% |
| No                                                                              |  | 23; 13%  |
| Don't know                                                                      |  | 4; 2%    |

Note: percentages may not add up to 100 due to rounding.

### Focus groups

One hundred and eighty-two members of the public who were approached were eligible to participate (i.e. they fitted the criteria for a particular focus group) and 81 people agreed to participate (45% participation rate; 48 women, 33 men). There were seven participants in each focus group apart from the 18-25 age group and high SEG group (eight participants in each); serious/chronic illness group and healthy volunteers group (six participants in each) and the pilot group (five participants).

### Survey

Four thousand six hundred and seven people were invited to take part in the survey; 2014 did not respond, 860 began completing the survey but did not finish, 102 did not qualify to continue (e.g. they were under 18 years old), 521 qualified for the survey but the quota was full and 1110 completed the questionnaire (28% response rate excluding those who did not qualify and where the quota was full). This response rate is comparable to similar studies on this topic[16]. Our participant quotas closely, though not exactly, matched our targets based on the UK population data as provided by the ONS. For this reason we carried out both weighted and un-weighted analyses. There was no difference in the conclusions we reached by either method. In this paper we present the un-weighted results (weighted results can be found at supplementary data file Appendix V).

### Importance of asking for consent

The majority of survey participants believed that obtaining consent for the use of residual biosamples was either extremely important (55%) or important (25%). Only 4% selected 'not at all important'. Focus group participants also saw the consent process as important and cited reasons including: that it was "polite", "respectful" and "morally correct" to ask permission; that it enabled people to feel they had made a contribution and an active choice; that it provided control, in particular for those people that might not want their biosamples to be used, for example for religious reasons; that taking

without asking was akin to theft; and that it was important in order to maintain trust between patients and doctors.

*"It then doesn't allow them to take liberties or advantage of the fact that you're out cold having an operation and someone says 'Oh we need a bit of that'."* Male, patient – had operation in past 2 years.

A small minority did not feel that consent was important, the main reasons being that they did not want the tissue back, that once it was removed it no longer 'belonged to them', and that the tissue would just go to waste otherwise.

Survey participants were asked what would be their preferred method of consenting to donate leftover biosamples for research use. The majority (65%) wanted to do so face-to-face with a health professional; 15% wanted to complete a form and return it by post. This issue was not specifically addressed with focus group participants due to time constraints.

### Preference for 'opt-in' or 'opt-out' consent

Participants were asked whether they preferred an opt-in or opt-out model of consent for donating residual biosamples. The results of the survey showed that opt-in consent was preferred by over half of the participants (55%), 28% preferred opt-out, 14% had no preference and 4% selected 'don't know'. Participants who were significantly more likely to prefer opt-in consent were: from a low SEG (E) (79.8% vs. 64.1%,  $X^2=11.13(1)$ ,  $p=0.001$ ); over 65 years (75.1% vs. 64%,  $X^2=7.68(1)$ ,  $p=0.006$ ); had a religious affiliation (68.8% vs. 61.2%,  $X^2=4.84(1)$ ,  $p=0.028$ ); and had an education level of GCSE or lower (71.1% vs. 63.9%,  $X^2=3.89(1)$ ,  $p=0.048$ ). The strongest significant predictor for preferring opt-in consent was being from a low SEG (E) (OR=2.22, 95% CI 1.41-3.57,  $p=0.001$ ) followed by having a religious affiliation (OR=1.36, 95% CI 1.01-1.81,  $p=0.04$ ) (Table 3).

Table 3: Multiple logistic regression of participant preferences for consent models

| Participant characteristic        | Coefficient | 95% CI     | Odds ratio | p value |
|-----------------------------------|-------------|------------|------------|---------|
| Preference for opt-in consent     |             |            |            |         |
| Socio-economic group              | 0.806       | 1.41, 3.57 | 2.22       | 0.001   |
| Religion                          | 0.304       | 1.01, 1.81 | 1.36       | 0.04    |
| Preference for consent every time |             |            |            |         |
| Religion                          | 0.72        | 1.05, 4.00 | 2.04       | 0.036   |
| Age                               | 0.47        | 1.07, 2.41 | 1.60       | 0.023   |
| Preference for specific consent   |             |            |            |         |
| Opt-in                            | 1.52        | 3.30, 6.35 | 4.58       | <0.001  |
| Ethnicity                         | 1.08        | 1.23, 7.14 | 2.94       | 0.015   |
| Preference for generic consent    |             |            |            |         |
| Opt-out                           | 1.52        | 3.13, 6.67 | 4.55       | <0.001  |

|                                       |      |            |      |       |
|---------------------------------------|------|------------|------|-------|
| Religion                              | 0.04 | 1.08, 2.72 | 1.56 | 0.021 |
| Knowledge of medical research process | 0.44 | 1.06, 2.28 | 1.56 | 0.024 |

Demographic items were excluded from this table if none was statistically significant. All variables were entered into the models as categorical variables.

CI: Confidence Interval.

Focus group participants preferred opt-out consent ( $n=46$ ; 57%) over opt-in consent ( $n=29$ ; 36%), with 6 participants (7%) unsure, after in-depth discussion around the benefits and disadvantages of each approach. The main benefit of opt-out consent cited by participants was that more biosamples would be available and consequently spur research. Other reasons included: that it would be less costly administratively; that it maximised the value of left over biosamples; that patients wouldn't have to consider it every time they were having an operation or blood test; that those that did not want to donate still had the opportunity to opt-out; and that it would 'normalise' donating leftover biosamples which would be a positive step.

*"It would an incentive for society if everyone knew that this is what happens routinely, but you can choose not to be involved. It would be more like 'that's normal'."* Male, aged 18-24 group

Those that preferred the opt-in approach cited the following reasons as to why: an active choice whereby participants had to act on a decision to take part was preferable to a passive choice whereby consent was assumed; it enabled people to have more control over their biosamples; it was truly 'informed consent' in the context of donating surplus samples for research (rather than as part of a clinical trial; clinical trials were outside the scope of the study) and hence more ethically acceptable; it enabled people to feel that they were making a positive contribution and would prevent the problem of vulnerable groups not being aware they were automatically 'opted-in'.

*"There are going to be members of the public who are not going to always be able to consider rationally themselves what it actually means."* Female, healthy volunteer

Whilst the majority of focus group participants overall preferred opt-out consent, the results were different for the three minority ethnic groups ("Black", "S. Asian", "Chinese"), where opt-in consent was favoured by the majority.

### **Consent once for life or consent every time**

The most prevalent system in current use for donating new biosamples that are surplus to clinical requirements in the UK is the opt-in approach, with potential donors being asked for consent every time a procedure is performed that may result in a biosample becoming available for research. (The law allows for the use of diagnostic archives for

1  
2  
3 research without consent as long as certain criteria are met). Participants were therefore  
4 asked to consider variations on this model and state whether they preferred: (1) consent  
5 once for life, covering all subsequent biosamples, until or unless the donor decides to  
6 withdraw consent; (2) consent every time samples surplus to diagnostic requirements  
7 may become available, or (3) consent at certain points in life. Consent every time (43%)  
8 was preferred by the majority of survey participants, followed by consent at certain  
9 points (27%) and consent once for life, e.g. at aged 18, (21%). Seven percent had no  
10 preference and 2% didn't know. Groups who were significantly more likely to prefer  
11 consent every time compared to consent once for life were: under 55 years (70.3% vs.  
12 60.9%;  $\chi^2=5.88(1)$ ,  $p=0.015$ ); had no knowledge of the research process (72.3% vs.  
13 63.4%;  $\chi^2=5.77(1)$ ,  $p=0.016$ ); or were either not at all or moderately religious (70.2%  
14 vs. 51.3%;  $\chi^2=5.1(1)$ ,  $p=0.024$ ). When entered into the regression analysis, the  
15 strongest significant predictor for preferring consent every time was being not at all or  
16 moderately religious (OR=2.04; 95% CI 1.05-4.00,  $p=0.036$ ) followed by being under  
17 55 years (OR=1.60; 95% CI 1.07-2.41,  $p=0.023$ ) (Table 3).  
18  
19  
20  
21  
22  
23  
24

25 Unlike survey responders, focus group participants favoured consent once for life ( $n=35$ ;  
26 43%) followed by consent every time samples surplus to diagnostic requirements may  
27 become available ( $n=27$ ; 33%) and consent at certain points ( $n=16$ ; 20%) with three  
28 choosing don't know (4%). Like opt-out consent, consent once for life was seen to be  
29 better as it was "quicker" and "easier" administratively and prevented researchers from  
30 "losing out". Consent provided most control for participants as you would "know the  
31 specific purpose of it", particularly if the sample was considered to be sensitive e.g.  
32 eggs; allowed "no room for error"; and enabled people to change their mind easily.  
33  
34  
35  
36  
37

38 *"You may feel differently [depending on] what tissue is being donated and for what*  
39 *purpose the research is being carried out."* Female, aged 18-24 group  
40  
41

42 Some participants had concerns about how consent preferences (e.g. what types of  
43 research they were willing to donate a biosample for), would follow them across the  
44 healthcare system if a 'consent once for life' model was adopted. Consent at certain  
45 points was seen by some as a good middle ground as patients would still have some  
46 control, but would not have to go through the consent process every time they had a  
47 medical procedure. Examples of consent at certain points included every "five or ten  
48 years", or at the beginning of particular episodes of care such as pregnancy or cancer  
49 treatment.  
50  
51  
52  
53

#### 54 **Models of consent for research use of biosamples**

55  
56  
57  
58  
59  
60

1  
2  
3 Survey participants were presented with four consent models (Table 1), and asked  
4 whether they would consider consenting residual biosamples to each of them, providing  
5 the research had been approved by a research ethics committee (described as a  
6 committee usually made up of doctors, scientist, patients and the general public which  
7 ensure any research allowed to be done is for the benefit of patients). Eighty percent  
8 would agree to specific consent – once only; 77% would consent to specific consent – for  
9 every new study; 71% would agree to tiered consent; and 67% of participants would  
10 agree to generic consent. When asked which model they preferred, specific consent - for  
11 every new study, was the first choice amongst those who had a preference (30% of  
12 participants overall), followed by generic consent and specific consent- once only, jointly  
13 second (both 18%), and lastly tiered consent (14%). Sixteen percent had no preference  
14 and 6% didn't know.

15  
16  
17  
18  
19  
20  
21 After collapsing the two specific consent models together (specific consent - for every  
22 new study and specific consent – once only), those participants who preferred specific  
23 consent were significantly more likely to: have a religious affiliation (63.9% vs. 48.9%,  
24  $X^2=16.88(1)$ ;  $p<0.001$ ); live in the North East or Scotland (60.9% vs. 42.7%,  
25  $X^2=10.23(1)$ ,  $p=0.001$ ); be over 65 years (67.1% vs. 57.1%,  $X^2=5.31(1)$ ,  $p=0.021$ );  
26 and be of a non-'White' ethnicity (68.9% vs. 58%,  $X^2=4.17(1)$ ,  $p=0.041$ ). Using the  
27 boost sample we found that 'Black' participants were significantly more likely to prefer  
28 specific consent models compared with 'White' participants (75.6% vs. 58%,  
29  $X^2=4.31(1)$ ,  $p=0.038$ ). Those people who preferred opt-in consent were also more likely  
30 to prefer specific consent models (71.1% vs. 35.3%,  $X^2=91.72(1)$ ,  $p<0.001$ ). The  
31 strongest significant predictor for preferring specific consent was preferring opt-in  
32 consent (OR=4.58, 95% CI 3.30-6.35,  $p<0.001$ ) followed by being of non-'White'  
33 ethnicity (OR=2.94, 95% CI 1.23-7.14,  $p=0.015$ ) (Table 3).

34  
35  
36  
37  
38  
39  
40  
41 We also looked at who was most likely to prefer generic consent, the least restrictive of  
42 the proposed consent models. Those that preferred generic consent were significantly  
43 more likely to: have no religious affiliation (51.1% vs. 36.1%,  $X^2=15.97(1)$ ,  $p<0.001$ );  
44 have some or good knowledge of the medical research process (26.1% vs. 18.3%,  
45  $X^2=6.79(1)$ ,  $p=0.009$ ); be male (26.8% vs. 19.9%,  $X^2=5.40(1)$ ,  $p=0.02$ ); and be from a  
46 higher SEG group (A-D) (24.3% vs. 15.1%,  $X^2=4.66(1)$ ,  $p=0.031$ ). They were also  
47 significantly more likely to prefer opt-out consent (64.7% vs. 28.9%,  $X^2=91.72(1)$ ,  
48  $p<0.001$ ). The strongest significant predictor for preferring generic consent was  
49 preferring opt-out consent (OR=4.55, 95% CI 3.13-6.67,  $p<0.001$ ) followed by having  
50 no religious affiliation (OR=1.56, 95% CI 1.08-2.72,  $p=0.021$ ) and some or good  
51 knowledge of the medical research process (OR=1.56, 95% CI 1.06-2.28,  $p=0.024$ )  
52 (Table 3).

1  
2  
3 Focus group preferences differed from those of survey responders with generic and  
4 tiered consent being equally popular (n=36; 44% and n=35; 43% respectively). Specific  
5 consent – once only, was least popular (n=6; 7%) (this was the only specific consent  
6 model given to participants). Four participants (5%) didn't know. Generic consent was  
7 valued as it provides most "flexibility for researchers"; reduces the likelihood residual  
8 biosamples will go to waste; is more straightforward to put in place; is "simpler to  
9 understand"; and enables biosamples to be used for more than "one specific thing".

10  
11  
12  
13  
14 *"It's better not to restrict the possible use of the sample because by restricting it you're*  
15 *increasing the chance that it'll go to waste. You want the highest probability that*  
16 *something good will come from it."* Male, patient – affected by a condition

17  
18  
19 It was also the consent model favoured by all participants who were affected by an  
20 illness or disability.

21  
22  
23 Tiered consent was valued because it provided more control over donated biosamples  
24 than generic consent, allowing people to opt-out of certain types of research, and  
25 therefore provided "clarity and peace of mind". All but one participant in the 'Black' focus  
26 group and all participants who had donated biosamples as healthy volunteers preferred  
27 tiered consent. Whilst specific consent was seen to provide the most control and enabled  
28 participants to have "some understanding of what it might be used for", concerns raised  
29 were that it "can't be used for anything else", "could be wasted" and would require a  
30 time-consuming explanation from health professionals.

31  
32  
33 In both the survey and focus groups, the donation of potentially sensitive biosamples  
34 produced a preference for specific consent. In the survey, a quarter (25%) preferred  
35 specific consent – for every new study, 22% preferred specific consent – once only, 12%  
36 preferred generic consent and 9% preferred tiered consent. Nineteen percent had no  
37 preference and 13% didn't know. When discussing donation of eggs, one woman  
38 commented:

39  
40  
41  
42  
43  
44  
45  
46 *"People could reproduce a child or whatever and it's about the personal-ness of what's*  
47 *been taken from you. So if it's a bit of blood, yeah take it, I mean you just cut yourself*  
48 *and blood is gone, but if it's something that's quite personal you only have every now*  
49 *and again, that needs to be guarded."* Female, 'Black' ethnicity group

50  
51  
52  
53  
54 We asked survey participants whether they would like to be kept up-to-date with  
55 research going on at a particular hospital or biobank to which they had donated a  
56  
57  
58  
59  
60



1  
2  
3 biosample. Eighty-five percent said they would be interested; the most popular methods  
4 to receive updates were via a website (27%), email (27%) or letter (22%).  
5  
6

## 7 **DISCUSSION**

8  
9  
10 This study contributes further to our understanding of the UK public's views and  
11 preferences towards consent for the use of biosamples in medical research. In summary,  
12 we have found that: 1) the consenting process was perceived as important in order to  
13 maintain trust between patients and health professionals and respect patient autonomy;  
14 2) survey participants exhibited a desire to retain active choice and control when  
15 donating biosamples and over the uses to which their biosamples might be put, and 3)  
16 these results differ from those reported during focus group discussions, where  
17 preference was for less restrictive consent models that are likely to increase availability  
18 of biosamples. These differences might be accounted for by the fact that focus group  
19 participants were given more background information about the use of residual  
20 biosamples in research and had time to consider the benefits and disadvantages of the  
21 different approaches. These interventions may have allayed any anxieties participants  
22 had about relinquishing control of their biosamples and seem to have encouraged  
23 participants to choose approaches that maximised biosample access to researchers,  
24 highlighting the importance and potential impact of education on influencing public  
25 perception in this area.  
26  
27  
28  
29  
30  
31  
32

33  
34 The preference for opt-in consent identified in the survey is consistent with the results of  
35 other studies in this area[3,15,16]. One reason for this preference may be that it  
36 matches the current system for organ donation for transplant in the UK. It was also  
37 perceived as being truly informed consent by some participants (although it is worth  
38 noting that it is the information provided to potential donors that guarantees consent is  
39 informed rather than the consent mechanism). Nevertheless, the sizeable number of  
40 survey responders who preferred opt-out consent (27%) coupled with the preference for  
41 opt-out amongst focus group participants (57%) does suggest that there may be  
42 broader support than previously believed for this approach. This point is also supported  
43 by the finding that fewer than half of survey participants wanted to be consented every  
44 time a sample was taken and nearly 30% preferred consent at certain points. Alternate,  
45 more streamlined approaches to consenting should therefore be considered and  
46 evaluated. Interestingly, our results showed that preference for opt-out consent was  
47 associated with being younger (under 65 years), from a higher SEG and a higher  
48 education level. These demographic groups may be more trusting of medical institutions  
49 to use residual biosamples appropriately, or perhaps feel empowered to be able to opt-  
50 out if so desired, for example, online. Similar findings have been reported in relation to  
51  
52  
53  
54  
55  
56  
57  
58  
59  
60



1  
2  
3 organ donation; a study by Gimbel et al. found an association between cadaveric  
4 donation rate and percentage of the population enrolled in third-tier education[25].  
5 Internet access has also been found to correlate with increased organ donation[26].  
6  
7

8 Concerning consent models for research use of biosamples, the majority of people (69%)  
9 were willing to donate biosamples via the least restrictive model, generic consent. A  
10 study conducted in Sweden found a similar percentage of the general public were happy  
11 to agree to generic consent (67%), whereby surrogate decisions were performed by a  
12 research ethics committee[27]. Other national studies have found the acceptability of  
13 generic consent amongst the general public and in particular patients to be higher,  
14 between 79%-95%[4,28-31]. Nevertheless, our survey findings suggest that willingness  
15 to donate increased where greater choice and control over research participation is  
16 retained, although the difference between those who were willing to agree to generic  
17 compared to specific was only 13%. Similarly, when survey responders were asked  
18 about their preferred approach, their preference was also for specific consent for every  
19 new study that might be conducted using their biosample. This may indicate a general  
20 interest in how samples are being used. This notion is supported by the high number of  
21 people who wanted ongoing contact about the research leading from their donation.  
22 Moreover, they may have not considered the practicalities of being asked to consent  
23 every time their sample is used, and the high level of recontact they might receive from  
24 research teams. Nevertheless, it is important to take note of the fact that more tailored  
25 forms of consent represent an attractive approach to many people. While specific  
26 consent may be practical for individual research projects, this restriction would make  
27 biobanking challenging, as biobanks exist to facilitate access to samples for a wide  
28 variety of approved research projects without the need for additional consent. It may be  
29 that as more sophisticated biosample tracking and management systems are adopted,  
30 resources could become available to support more interactive forms of consent, and  
31 more biobanks could offer tiered consent, for example. Further public dialogue and  
32 information about the use of the samples may also provide the same assurances for  
33 people that arise from specific consent, as highlighted by the preference for less  
34 restrictive consent models amongst focus group participants.  
35  
36  
37  
38  
39  
40  
41  
42  
43  
44  
45  
46  
47

48 Evidence from other empirical studies looking at preferences for consent models is  
49 mixed. UK studies focusing on donations purely for research by 'healthy volunteers' to  
50 biobanks (i.e. not donating residual biosamples) have identified a preference for specific  
51 consent,[19,32] as did a study conducted in the USA that also focused on healthy  
52 volunteers[15]. In a pan-European survey, the majority of the UK public also preferred  
53 specific consent for every new study, although the percentage that did was slightly lower  
54 than the overall European average (65% compared to 67%)[33]. It was, however,  
55  
56  
57  
58  
59  
60

1  
2  
3 higher than in Denmark and Finland, where the percentage of people who wanted to be  
4 re-contacted for every new study was lower at 51% and 54% respectively. These  
5 countries were also found to have very few concerns about the collection of personal  
6 information by biobanks and had high levels of trust in ethics committees. Other  
7 empirical work conducted in the USA, Canada, Sweden and Spain has shown that public  
8 preference is for generic consent[3,16,18,34,35]. These findings highlight the divergence  
9 of opinion on this issue, in particular in different contexts and with different information  
10 provision, although the difficulty of comparing across studies with different  
11 methodologies and backgrounds must also be taken into account. Notably, where  
12 participants had some or good knowledge of the research process and where there was  
13 in-depth discussion (i.e. during focus groups), participants were more likely to prefer  
14 generic consent, a finding that has also been identified elsewhere in the literature[36]  
15 and supports the need for information and education if increasing the acceptability of  
16 generic consent is deemed desirable. Focus group participants affected by an illness or  
17 disability were also found to prefer generic consent, and is likely to reflect the fact that  
18 they have greater interests at stake[37]. Preference for specific consent was found to be  
19 associated with being over 65 years and from a non-‘White’ ethnicity, findings which  
20 resonate with other studies[3,38,39]. Consent documentation and written information  
21 targeted specifically at these particular groups may also help alleviate any specific  
22 concerns these groups may have.  
23  
24  
25  
26  
27  
28  
29  
30  
31  
32

33 This research into current public attitudes regarding biosample donation in the UK  
34 provides valuable guidance for biobanking governance. Whilst generic consent is the  
35 model largely endorsed by regulators and funders in the UK[9,11], the evidence from  
36 this study suggests that there is a need to address the potential concerns that some  
37 people may have about the minimal information and lack of control provided through  
38 this model. Education and opportunity for discussion may be one way to allay concerns,  
39 as demonstrated through focus groups. Keeping donors informed of current research  
40 taking place at the hospital or research institutions to which they donated also appears  
41 to be desirable and is likely to be both motivating and promote public trust and  
42 confidence in the research process, a finding reported elsewhere[40]. The opportunity  
43 for face-to-face discussion with an appropriately trained healthcare professional at the  
44 time of donation may also allay any potential concerns, and is indeed the approach  
45 usually taken in the UK at present. This approach has been found to yield high  
46 acceptance rates amongst patients of well over 90%[41-43].  
47  
48  
49  
50  
51  
52  
53

### 54 **Strengths and Limitations**

55  
56  
57  
58  
59  
60

1  
2  
3 This was a mixed methods study to explore public views and preferences towards  
4 consent for biosample donation. Integrating quantitative and qualitative approaches is  
5 valuable in exploratory research as it can strengthen the inferences made through  
6 triangulation and allow for a more nuanced understanding of the topic[44]. This study  
7 presented participants with a series of hypothetical questions about their preferences  
8 and willingness to donate residual biosamples for medical research. By presenting  
9 questions as 'real life' scenarios, we hoped to make the questions as realistic as possible.  
10 However, as with any hypothetical scenario, the findings may not necessarily correlate  
11 with actual behaviour.  
12

13  
14  
15  
16  
17 The questions for both the focus groups and the survey were piloted to ensure they were  
18 clear and understandable and were not biased towards any particular viewpoint.  
19 Nevertheless, many of the issues covered were complex, particularly around the  
20 meaning of the different consent models which may have contributed to the dropout  
21 rate. Focus groups participants were not presented with the option of 'specific consent –  
22 for every new study' (they were only given 'specific consent – once only'). This may  
23 have been an attractive option for some given that a concern raised was biosamples  
24 being wasted. However, given that the key reasons participants' valued generic consent  
25 were because it provided most flexibility to researchers and was most straightforward to  
26 administer, this seems unlikely. In addition, given time and resource constraints we were  
27 unable to explore whether 'stronger' consent models would have been preferable for  
28 organisations that donors trusted less. This is an area that would be worth exploring  
29 further in future research. Participants who did complete the survey may have done so  
30 because of strong feelings about the issues raised and this may have skewed the results;  
31 however, every effort was made to ensure that the results were as representative of the  
32 UK population as possible. The focus groups and survey were conducted in English and  
33 so the findings may not be representative of non-English speaking members of the  
34 general public. Future research might target these particular groups.  
35  
36  
37  
38  
39  
40  
41  
42

## 43 **CONCLUSION**

44  
45  
46 There is a general willingness amongst the UK population to donate biosamples for  
47 medical research. Our research suggests that there is a preference amongst the UK  
48 public for more information on the uses and outcomes of research, and ongoing choice  
49 and control over donated biosamples. Our study also supports the premise that  
50 increased knowledge and opportunity for discussion is associated with acceptance of less  
51 restrictive consent models.  
52  
53  
54  
55  
56  
57  
58  
59  
60

1  
2  
3 **Acknowledgements** We would like to thank Lisa Bennett, Sarah Dickson, Catherine  
4 Elliott, James Ironside and Chris Womack and for their helpful comments on this paper;  
5 Sarah Dickson, Jim Elliott and Neil Formstone for their contribution to the design of the  
6 study; and Samantha Reeve and Zheng Lei for help with data analysis.  
7  
8

9  
10 **Funding statement** This work was supported by a grant from the Technology Strategy  
11 Board through the Stratified Medicines Competition grant number 101021, direct  
12 financial contributions by AstraZeneca and resource in kind by AstraZeneca,  
13 GlaxoSmithKline and Lab 21.  
14

15  
16 **Competing interests:** Lesley Stubbins is an employee of GlaxoSmithKline. Mark  
17 Robertson is an employee of AstraZeneca.  
18

19  
20 **Contributors:** J.C. conceived the study. All authors contributed to the study design. In  
21 addition to all the authors, Sarah Dickson, Jim Elliott and the late Neil Formstone also  
22 contributed towards the design of the study and development of the focus group and  
23 survey questions. C.L. facilitated the focus groups. Focus group recruitment was  
24 conducted by the company The Focus Group; the survey was conducted through the  
25 market research company Research Now. C.L. conducted data analysis and  
26 interpretation with the help of Samantha Reeve and Zheng Lei. The initial draft of the  
27 manuscript was prepared by C.L and then circulated repeatedly among the authors for  
28 critical revision. All authors approved the final manuscript.  
29  
30  
31  
32

33  
34 **Ethical approval** This study was approved by the Ethics Review Board of the University  
35 of Manchester, reference 11459.  
36

37  
38 **Data sharing statement** Transcripts from the focus groups and full results of the  
39 survey are available from CL at [celine@geneticalliance.org.uk](mailto:celine@geneticalliance.org.uk). Supplementary material is  
40 also available at [www.geneticalliance.org.uk/projects/stratum\\_docs.htm](http://www.geneticalliance.org.uk/projects/stratum_docs.htm)  
41  
42  
43  
44

## 45 REFERENCES

- 46  
47  
48 1. Oosterhuis JW, Coebergh JW, van Veen EB. Tumour banks: well-guarded treasures in  
49 the interest of patients. *Nature reviews. Cancer* 2003;**3**:73-7.  
50  
51 2. Elger BS, Caplan AL. Consent and anonymization in research involving biobanks:  
52 differing terms and norms present serious barriers to an international framework.  
53 *EMBO reports* 2006;**7**:661-6.  
54  
55 3. Murphy J, Scott JCGC, Kaufman D, et al. Public Perspectives on Informed Consent for  
56 Biobanking. *American Journal of Public Health* 2009;**99**:2128-34.  
57  
58  
59  
60

- 1  
2  
3 4. Wendler D. One-time general consent for research on biological samples. *BMJ*  
4 2006;**332**:544-7.
- 5  
6 5. Allen J, McNamara B. Reconsidering the value of consent in biobank research.  
7 *Bioethics* 2011;**25**:155-66.
- 8  
9 6. Department of Health. The Human Tissue Act. 2004  
10 [http://www.dh.gov.uk/prod\\_consum\\_dh/groups/dh\\_digitalassets/@dh/@en/docu](http://www.dh.gov.uk/prod_consum_dh/groups/dh_digitalassets/@dh/@en/documents/digitalasset/dh_4103686.pdf)  
11 [ments/digitalasset/dh\\_4103686.pdf](http://www.dh.gov.uk/prod_consum_dh/groups/dh_digitalassets/@dh/@en/documents/digitalasset/dh_4103686.pdf) Accessed 11 November 2011.
- 12  
13 7. Hansson MG, Dillner J, Bartram CR, et al. Should donors be allowed to give broad  
14 consent to future biobank research? *Lancet Oncol* 2006;**7**:266-9.
- 15  
16 8. Hoeyer K. Donors perceptions of consent to and feedback from biobank research:  
17 Time to acknowledge diversity? *Public Health Genomics* 2010;**13**:345-52.
- 18  
19 9. Human Tissue Authority. Consent exemptions from the Human Tissue Act 2004  
20 <http://www.hta.gov.uk/licensingandinspections/consentexemptions.cfm> Accessed  
21 26 February 2013.
- 22  
23 10. Integrated Research Application System. Guidance document for researchers.  
24 [https://www.myresearchproject.org.uk/Help/Help%20Documents/PdfDocuments/](https://www.myresearchproject.org.uk/Help/Help%20Documents/PdfDocuments/researchtissuebank.pdf)  
25 [researchtissuebank.pdf](https://www.myresearchproject.org.uk/Help/Help%20Documents/PdfDocuments/researchtissuebank.pdf) Accessed 25 February 2013.
- 26  
27 11. Medical Research Council (MRC) and National Cancer Research Institute (NCRI). UK  
28 Funders' Vision for Human Tissue Resources, September 2011.
- 29  
30 12. Nuffield Council on Bioethics. Human bodies: donations for medicine and research.  
31 2011 [http://www.nuffieldbioethics.org/sites/default/files/Donation\\_full\\_report.pdf](http://www.nuffieldbioethics.org/sites/default/files/Donation_full_report.pdf)  
32 Accessed 26 February 2013.
- 33  
34 13. Petrini C. "Broad" consent, exceptions to consent and the question of using biological  
35 samples for research purposes different from the initial collection purpose. *Social*  
36 *Science and Medicine* 2010;**70**:217-20.
- 37  
38 14. Tupasela A, Sihvo S, Snell K, et al. Attitudes towards biomedical use of tissue sample  
39 collections, consent, and biobanks among Finns. *Scandinavian Journal of Public*  
40 *Health* 2010;**38**:46-52.
- 41  
42 15. Kaufman D, Bollinger J, Dvoskin R, et al. Preferences for opt-in and opt-out  
43 enrollment and consent models in biobank research: a national survey of  
44 Veterans Administration patients. *Genetics in medicine : official journal of the*  
45 *American College of Medical Genetics* 2012;**14**:787-94.
- 46  
47 16. Simon CM, L'Heureux J, Murray JC, et al. Active choice but not too active: Public  
48 perspectives on biobank consent models. *Genetics in Medicine* 2011;**13**:821-31.
- 49  
50 17. Willison DJ, Swinton M, Schwartz L, et al. Alternatives to project-specific consent for  
51 access to personal information for health research: insights from a public  
52 dialogue. *BMC Med Ethics* 2008;**9**:18.
- 53  
54  
55  
56  
57  
58  
59  
60

- 1  
2  
3 18. Kettis-Lindblad Å, Ring L, Viberth E, et al. Perceptions of potential donors in the  
4 Swedish public towards information and consent procedures in relation to use of  
5 human tissue samples in biobanks: A population-based study. *Scandinavian*  
6 *Journal of Public Health* 2007;**35**:148-56.  
7  
8 19. Shickle D, Hapgood R, Carlisle J, et al. Public attitudes to participating in UK  
9 Biobank. A public consultation on issues relating to feedback, consent, withdrawal  
10 and access: School of Health and Related research (SchARR). University of  
11 Sheffield, 2003.  
12  
13 20. Haddow G, Cunningham-Burley S, Murray L. Can the governance of a population  
14 genetic data bank effect recruitment? Evidence from the public consultation of  
15 Generation Scotland Public Underst Sci 2011117-29.  
16  
17 21. Start RD, Brown W, Bryant RJ, et al. Ownership and uses of human tissue: Does the  
18 Nuffield bioethics report accord with opinion of surgical inpatients? *BMJ*  
19 1996;**313**:1366-68.  
20  
21 22. Ipsos MORI Social Research Institute. Human Tissue Authority General Public  
22 Survey. 2010 [http://www.hta.gov.uk/  
23 db/ documents/2007-09-  
24 10 Ipsos MORI general public qual and quant report final 200709101952.pdf](http://www.hta.gov.uk/db/documents/2007-09-10_Ipsos_MORI_general_public_qual_and_quant_report_final_200709101952.pdf)  
25 Accessed 26 February 2013.  
26  
27 23. Miles JN, Shevlin M. *Applying regression and correlation: a guide for students and*  
28 *researchers*. London: Sage, 2001.  
29  
30 24. Cohen J. *Statistical power analysis for the behavioural sciences* 2nd ed. New York:  
31 Academic Press, 1988.  
32  
33 25. Gimbel RW, Strosberg MA, Lehrman SE, et al. Presumed consent and other  
34 predictors of cadaveric organ donation in Europe. *Prog Transplant* 2003;**13**:17-  
35 23.  
36  
37 26. Rithalia A, McDaid C, Suekarran S, et al. Impact of presumed consent for organ  
38 donation on donation rates: a systematic review. *BMJ* 2009;**338**:a3162.  
39  
40 27. Hoeyer K, Olofsson B-O, Mjörndal T, et al. Informed consent and biobanks: a  
41 population-based study of attitudes towards tissue donation for genetic research.  
42 *Scandinavian Journal of Public Health* 2004;**32**:224-29.  
43  
44 28. McQuillan GM, Porter KS, Agelli M, et al. Consent for genetic research in a general  
45 population: the NHANES experience. *Genetics in medicine : official journal of the*  
46 *American College of Medical Genetics* 2003;**5**:35-42.  
47  
48 29. Hoeyer K, Olofsson BO, Mjörndal T, et al. The ethics of research using biobanks:  
49 Reason to question the importance attributed to informed consent. *Archives of*  
50 *Internal Medicine* 2005;**165**:97-100.  
51  
52  
53  
54  
55  
56  
57  
58  
59  
60

- 1  
2  
3 30. Stegmayr B, Asplund K. Genetic research on blood samples stored for years in  
4 biobanks. Most people are willing to provide informed consent. *Lakartidningen*  
5 2003;**100**:618-20.  
6  
7 31. Malone T, Catalano PJ, O'Dwyer PJ, et al. High rate of consent to bank biologic  
8 samples for future research: the Eastern Cooperative Oncology Group experience.  
9 *Journal of the National Cancer Institute* 2002;**94**:769-71.  
10  
11 32. Gaskell G, Gottweis H, Starkbaum J, et al. Publics and biobanks: Pan-European  
12 diversity and the challenge of responsible innovation. *Eur J Hum Genet* 2012.  
13  
14 33. TNS Opinion & Social on request by the European Commission. Eurobarometer 73.1:  
15 Biotechnology. 2010  
16 [http://ec.europa.eu/public\\_opinion/archives/ebs/ebs\\_341\\_en.pdf](http://ec.europa.eu/public_opinion/archives/ebs/ebs_341_en.pdf) Accessed 15  
17 May 2013.  
18  
19 34. Master Z, Claudio JO, Rachul C, et al. Cancer patient perceptions on the ethical and  
20 legal issues related to biobanking. *BMC Med Genomics* 2013;**6**:8.  
21  
22 35. Valle-Mansilla JI, Ruiz-Canela M, Sulmasy DP. Patients' attitudes to informed consent  
23 for genomic research with donated samples. *Cancer investigation* 2010;**28**:726-  
24 34.  
25  
26 36. Gaskell G, Gottweis H. Biobanks need publicity. *Nature* 2011;**471**:159-60.  
27  
28 37. Tupasela A, Snell K. National interests and international collaboration: tensions and  
29 ambiguity among Finns towards usages of tissue samples. *New Genetics and*  
30 *Society* 2012;**31**:424-41.  
31  
32 38. Nilstun T, Hermeren G. Human Tissue Samples and Ethics. *Medicine, Health Care*  
33 *and Philosophy* 2006;**9**:81-86.  
34  
35 39. Ma Y, Kong X, Dai H, et al. Attitudes towards biosample donation in andrology  
36 patients. *International journal of andrology* 2012;**35**:170-5.  
37  
38 40. Haddow G, Cunningham-Burley S, Bruce A, et al. Generation Scotland: consulting  
39 publics and specialists at an early stage in a genetic database's development.  
40 *Critical Public Health* 2008;**18**:139-49.  
41  
42 41. Jack AL, Womack C. Why surgical patients do not donate tissue for commercial  
43 research: review of records. *BMJ* 2003;**327**:262.  
44  
45 42. Bryant RJ, Harrison RF, Start RD, et al. Ownership and uses of human tissue: what  
46 are the opinions of surgical in-patients? *Journal of clinical pathology*  
47 2008;**61**:322-26.  
48  
49 43. Wheeler J, Agarwal M, Sugden J, et al. Experiences from the front-line routine  
50 consenting of surplus surgically removed tissue: without investment by the  
51 National Health Service fully informed consent for all is not available. *J Clin Pathol*  
52 2007;**60**:351-4.  
53  
54  
55  
56  
57  
58  
59  
60



1  
2  
3  
4  
5  
6  
7  
8  
9  
10  
11  
12  
13  
14  
15  
16  
17  
18  
19  
20  
21  
22  
23  
24  
25  
26  
27  
28  
29  
30  
31  
32  
33  
34  
35  
36  
37  
38  
39  
40  
41  
42  
43  
44  
45  
46  
47  
48  
49  
50  
51  
52  
53  
54  
55  
56  
57  
58  
59  
60

44. Teddlie C, Tashakkori A. *Foundations of Mixed Methods Research: Integrating Quantitative and Qualitative Approaches in the Social and Behavioral Sciences*. Thousand Oaks, California: Sage Publications, Inc., 2009.

For peer review only



1  
2  
3 **Consent for the use of human biological samples for biomedical research – a**  
4 **mixed methods study exploring the UK public’s preferences**  
5  
6  
7

8  
9 Celine Lewis<sup>1</sup>, Margaret Clotworthy<sup>2</sup>, Shona Hilton<sup>3</sup>, Caroline Magee<sup>4</sup>, Mark J Robertson<sup>5</sup>,  
10 Lesley J Stubbins<sup>6</sup>, Julie Corfield<sup>7</sup>  
11

12 <sup>1</sup>Genetic Alliance UK, Unit 4D Leroy House, 436 Essex Road, London, N1 3LY, UK

13 <sup>2</sup>Human Focused Testing, 50 the Barns, Littleport, Cambridge, CB6 1GG, UK

14 <sup>3</sup>Medical Research Council/CSO Social & Public Health Sciences Unit, 4 Lilybank Gardens,  
15 Glasgow, G12 8RZ, UK  
16

17 <sup>4</sup>Confederation of Cancer Biobanks, National Cancer Research Institute, Angel Building,  
18 407 St John Street, London EC1V 4AD, UK  
19

20 <sup>5</sup>AstraZeneca, Science Policy & Relations, 11G43 Mereside, Alderley Park, Macclesfield,  
21 Cheshire SK10 4TF, UK  
22

23 <sup>6</sup>GlaxoSmithKline Medicines Research Centre, Gunnels Wood Road, Stevenage,  
24 Hertfordshire, SG1 2NY, UK  
25

26 <sup>7</sup>Areteva Ltd, BioCity, Nottingham, NG1 1GF, UK  
27  
28

29  
30 **Running title:** Consent for the use of biosamples - the UK public's preferences  
31

32  
33  
34 **Correspondence to:**

35  
36 Dr Celine Lewis

37 Genetic Alliance UK,

38 Unit 4D Leroy House,

39 436 Essex Road,

40 London,

41 N1 3QP  
42

43 **Email:** celine@geneticalliance.org.uk  
44  
45

46  
47  
48  
49  
50  
51 **Keywords:** consent, biobanking, public views, public preferences, biomedical research  
52

53  
54 **Word count:** 5306  
55  
56  
57  
58  
59  
60

**ABSTRACT**

**Objective:** A mixed methods study exploring the UK general public's views towards consent for the use of biosamples for biomedical research.

**Setting:** Cross-sectional population-based focus groups followed by an online survey.

**Participants:** Twelve focus groups (81 participants) selectively sampled to reflect a range of demographic groups; 1110 survey responders recruited through a stratified sampling method with quotas set on sex, age, geographical location, socio-economic group and ethnicity.

**Main outcome measures:** 1) Views on the importance of consent when donating residual biosamples for medical research; 2) preferences for opt-in or opt-out consent approaches; 3) preferences for different consent models.

**Results:** Participants believed obtaining consent for use of residual biosamples was important as it was "morally correct" to ask, and enabled people to make an active choice and retain control over their biosamples. Survey responders preferred opt-in consent (55%); the strongest predictor was being from a low socio-economic group (OR 2.22, 95% CI 1.41-3.57,  $p=0.001$ ) and having a religious affiliation (OR 1.36, 95% CI 1.01-1.81,  $p=0.04$ ). Focus group participants had a slight preference for opt-out consent because by using this approach more biosamples would be available and facilitate research. Concerning preferred models of consent for research use of biosamples, survey responders preferred specific consent with re-contact for each study for which their biosamples are eligible. Focus group participants preferred generic consent as it provided "flexibility for researchers" and reduced the likelihood that biosamples would be wasted. The strongest predictor for preferring specific consent was preferring opt-in consent (OR 4.58, 95% CI 3.30-6.35,  $p=0.015$ ) followed by non-'White' ethnicity (OR 2.94, 95% CI 1.23-7.14,  $p<0.001$ ).

**Conclusions:** There is a preference amongst the UK public for ongoing choice and control over donated biosamples, however increased knowledge and opportunity for discussion is associated with acceptance of less restrictive consent models for some people.

## ARTICLE SUMMARY

### Article focus

- To explore views of the UK public on the importance of consent being sought to the use of residual biosamples for medical research;
- The publics' preferences for opt-in or opt-out approaches to consent;
- The publics' preferences for generic, tiered or specific consent.

### Key messages

- Obtaining consent for the use of residual biosamples for biomedical research was perceived as important by members of the general public.
- Survey participants exhibited a desire to retain active choice and control when donating biosamples and over the uses to which their biosamples might be put, preferring an opt-in system and specific consent, however these results differ from those reported during focus group discussions, where preference was for less restrictive consent models (an opt-out system and generic consent) that are likely to increase availability of biosamples.
- These differences might be accounted for by the fact that focus group participants were given more background information about the use of residual biosamples in research and had time to consider the benefits and disadvantages of the different approaches.

### Strengths and limitations of this study

- This study contributes further to our understanding of the UK public's views and preferences towards consent for the use of biosamples in medical research. Our study supports the premise that increased knowledge and opportunity for discussion is associated with acceptance of less restrictive consent models.
- Due to the hypothetical nature of the study, the findings may not necessarily correlate with actual behaviour.

## INTRODUCTION

Human biological samples (biosamples), including organs, tissues, biofluids such as blood, and their derivatives, are increasingly important resources for biomedical research[1,2]. For example, they can help us to understand how we diagnose, categorise and treat a whole variety of medical conditions including cancer[1] and are particularly important when studying rare diseases or conditions where biosamples are hard to obtain. Biosamples are donated by either healthy volunteers or patients, either through specific research studies or as residual tissues or biofluids surplus to diagnostic requirements, or post mortem. Biosamples can be used fresh or can be first stored in a biobank, a collection of biosamples often linked with the donors' clinical and demographic information, as biosample attributes. Here, the quality of the data linked to the biosample is as important as the quality of the biosamples themselves, providing essential context within which to design analyses and interpret results or carry our further experimental studies. Clinical data may also be enriched with lifestyle and environmental information[3].

It is widely accepted that that donor consent should be sought and obtained before biosamples can be used in research[4,5]. Consent in research ethics relates to ensuring respect for the autonomy and dignity of the donors (research participants) and protecting them from abuse[5] and In fact, in England, Wales and Northern Ireland, the Human Tissue Act establishes donor consent as the baseline principle for the retention and use of organs and tissue for purposes beyond diagnosis and treatment, although further statutory consent exemptions do exist in certain circumstances, notably use of anonymised tissue from the living for research ethics committee (REC) approved research projects[6]. The value of biobanks, in supporting broad, long-term research purposes, means that the model of the consent process needs to be considered in order to ensure that it is valid and appropriate. A number of different consent frameworks which address consent scope and process have been proposed as a result[5]. However, there is continued debate as to which is the most appropriate in various situations[4,7,8].

Both the Human Tissue Authority[9] and National Research Ethics Service[10] recommend generic consent (Table 1), a view that has also been endorsed by UK research funders[11] and the Nuffield Council on Bioethics[12]. One commonly cited criticism of generic consent is that it is not sufficiently 'informed' as future research uses are not known at the time of donation[13]. Empirical research examining public and patient preferences has highlighted that there is no clear consensus on the issue, with

specific consent being identified as the most favoured form of consent in some studies[14,15], and generic consent in others[16-18].

Table 1: Approaches to consent of biosamples

| <b>Initial consent methods</b>                |                                                                                                                                                                                                                                                                                                                      |
|-----------------------------------------------|----------------------------------------------------------------------------------------------------------------------------------------------------------------------------------------------------------------------------------------------------------------------------------------------------------------------|
| Opt-in consent                                | The storage and use of biosamples for research on the basis that the donor has actively agreed to do so.                                                                                                                                                                                                             |
| Opt-out consent                               | The storage and use of samples for research on the basis that the donor has not objected, after previously being given the opportunity to do so.                                                                                                                                                                     |
| <b>Opt-in consent methods</b>                 |                                                                                                                                                                                                                                                                                                                      |
| Consent once for life                         | Consent is provided once for life for use of any residual samples for research with the option of withdrawing permission at a later stage if the donor wishes to do so.                                                                                                                                              |
| Consent at certain points                     | Consent is provided at certain points for use of residual biosamples for research, e.g. every 10 years or at the beginning of a particular episode of care.                                                                                                                                                          |
| Consent every time                            | Consent is requested every time residual biosamples may become available for use in research.                                                                                                                                                                                                                        |
| <b>Consent for research use of biosamples</b> |                                                                                                                                                                                                                                                                                                                      |
| Generic consent                               | Consent to the use of donated samples for a range of unknown uses, on the basis of general information about those possible uses and about the governance arrangements in place. <u>Also referred to as 'broad' or 'blanket' consent.</u>                                                                            |
| Tiered consent                                | A more restricted form of consent for use of samples, where the donor is invited to agree to the use of their samples in unknown projects, but given the option of specifying particular categories of research that they wish to exclude e.g. embryonic research. <u>Also referred to as 'categorical' consent.</u> |
| Specific consent –once only                   | Consent to the use of donated samples for a specified study only, on the basis of information provided about that study. Any residual sample will be discarded at the end of that study.                                                                                                                             |
| Specific consent – for every new study        | Consent to the use of donated samples for a specified study, on the basis of information provided about that study. However, participants are re-contacted and asked to consider participating in every new study for which their biosamples are eligible.                                                           |

Note: Consent terms were selected based on common usage within the UK biobanking system (for example, generic consent is the term used by the Human Tissue Authority, National Research Ethics Service, and National Cancer Research Institute) and definitions chosen in consultation with a team of representatives from universities, hospital biobank staff, pathologists and industry.

1  
2  
3 The 2011 Nuffield Council report on donation of human material for medicine and  
4 research also recommends that research funders should work to increase public  
5 awareness of the key role of donated tissue in scientific and clinical research[12]. Public  
6 trust and confidence in the consent process is of paramount importance to maintain and  
7 increase public support for donation and use of biosamples for biomedical research in the  
8 UK. For this reason, it is important to understand and inform public opinion to ensure  
9 consent models are aligned to public expectations and preferences. Whilst numerous  
10 international studies have been conducted which focus on consent preferences, research  
11 conducted in the UK has tended to focus on large scale population biobanks, such as UK  
12 Biobank[19] or Generation Scotland[20], which require ongoing contact with donors, or  
13 on the views of patients on the donation of residual biosamples[21]. The current study  
14 was conducted to broaden our understanding of the UK public's views on biosample  
15 donation for biomedical research. Moreover, the findings are intended to inform a  
16 biobanking policy for STRATUM (Strategic Tissue Repository Alliance Through Unified  
17 Methods), a Technology Strategy Board<sup>i</sup> and pharmaceutical industry-funded project  
18 seeking to address the problem of insufficient numbers of biosamples and associated  
19 clinical data of adequate quality to fully support biomedical research in the UK.  
20  
21

22  
23  
24  
25  
26  
27  
28  
29 The specific aims of this study were to 1) identify participants' views on the importance  
30 of consent when donating residual biosamples for medical research; 2) explore  
31 preferences for opt-in or opt-out approaches to consent; and 3) explore preferences for  
32 different consent models (Table 1). Public willingness to donate biosamples, views on  
33 donation of different biosample types, and conditions of their use (by which  
34 organisations and for which types of research) are reported elsewhere (Public views on  
35 the donation and use of human biological samples in biomedical research – a mixed  
36 methods study, 2013, unpublished manuscript).  
37  
38  
39

## 40 41 **METHODS**

42  
43  
44 This was a mixed methods study comprising qualitative focus groups and a quantitative  
45 on-line survey. Ethical approval for the study was granted by the University of  
46 Manchester Research Ethics Committee in April 2012.  
47  
48

### 49 **Focus groups**

50  
51  
52 Twelve focus groups (including one pilot group) were conducted between May and July  
53 2012 in six different geographic locations across the UK. Participants were recruited  
54 face-to-face in the street by a market research company The Focus Group. Participants  
55  
56

---

57  
58 <sup>i</sup> under the Stratified Medicines Programme: Business Models Value Systems  
59  
60

1  
2  
3 were purposively sampled; each group chosen to reflect a particular demographic (age,  
4 socio-economic group (SEG), ethnicity) in order to gather a wide spectrum of views and  
5 enable comparisons across groups. Two 'patient' groups were also included, comprising  
6 people who had had an operation in the past two years requiring an overnight hospital  
7 stay, and people who currently have, or have had, either a serious or chronic illness, or  
8 disability. The latter group comprised people diagnosed with diabetes, cancer, heart  
9 disease, asthma and the genetic condition Marfan syndrome. A further group consisted  
10 of generally healthy ~~volunteers~~ people who had donated a biosample specifically for  
11 research purposes.  
12  
13  
14  
15  
16

17  
18 Before agreeing to take part, potential participants were given a participant information  
19 sheet telling them about the study (see supplementary data file Appendix I). Those that  
20 were interested were screened through a questionnaire containing demographic  
21 questions to assess their suitability for a particular focus group. These were held in  
22 'neutral' locations such as hotel conference rooms or church halls and facilitated by an  
23 experienced facilitator (CL). Before each group discussion, participants were sent a short  
24 information leaflet about the use of biosamples in biomedical research to provide some  
25 background context for the discussion and to prompt them to think about the key issues  
26 (see supplementary data file Appendix II). This information was written by a core team  
27 of authors drawn from across academia and industry, including patient representation. It  
28 was reviewed by three members of the patient organisation Genetic Alliance UK as well  
29 as the science communication charity Sense about Science to ensure readability and  
30 non-bias. Before focus group discussions began, participants were asked to sign a  
31 consent form. Each participant received ~~a £50 small honorarium~~ for taking part to cover  
32 time and travel costs. Focus groups lasted 90 minutes and digital audio recordings were  
33 taken.  
34  
35  
36  
37  
38  
39  
40  
41

42  
43 A detailed discussion guide was developed to explore participant views and preferences  
44 towards consent scope and process (see supplementary data file Appendix III). The main  
45 focus related to the use of biosamples surplus to diagnostic requirements following  
46 surgery or a medical procedure. Questions were informed by other empirical studies of  
47 consent in biobanking[16,22], developed by the authors, and addressed the topics  
48 described above. To enhance understanding around the different consent models,  
49 participants were given a sheet presenting three different scenarios, each of which  
50 elaborated on one of the three consent models chosen for discussion (see supplementary  
51 data file Appendix III, p.4IV). For each topic, discussion began by asking the group to  
52 consider the benefits and disadvantages of each particular approach. Once no new  
53 themes were emerging, each participant was asked to complete an accompanying  
54  
55  
56  
57  
58  
59  
60



1  
2  
3 anonymous questionnaire which asked them to select their preferred consent model. The  
4 discussion guide, scenario sheet and questionnaire were piloted at the first focus group  
5 which resulted in some minor amendments to wording.  
6

7  
8 Recordings were fully transcribed and transcriptions checked. The software package  
9 Nvivo version 9 (QSR International, Pty Ltd) was used to help organise the data for  
10 analysis. This comprised grouping responses to questions into broad thematic categories  
11 which were then refined through sub-codes. Coding of all 12 transcripts was conducted  
12 by CL. The first six transcripts to be coded were also independently coded by—and  
13 verified by a second researcher (SR). Codes were then compared to assess consistency  
14 of coding and ensure inter-rater reliability. Any discrepancies were discussed until  
15 consensus was reached. The remainder of the transcripts were then coded according to  
16 the agreed coding framework. —to ensure inter-rater reliability. Any discrepancies were  
17 discussed between the two researchers until consensus was reached.  
18  
19  
20  
21  
22

## 23 Survey

24  
25  
26 Once data analysis had been conducted on the focus group transcripts, the findings were  
27 used to inform development of a quantitative survey which was used to canvas public  
28 opinion on the issues of interest across a representative sample of the UK population  
29 (see supplementary data file Appendix IV). The survey was carried out by the market  
30 research company Research Now using their online panel community of UK residents. A  
31 stratified sampling method was used: quotas were set on sex, age, geographical  
32 location, SEG and ethnicity, in line with data provided by the Office of National Statistics  
33 (ONS) to ensure the sample was as representative of the UK population as possible.  
34 Within each category, a random sample was selected from the Research Now database  
35 containing 451,185 active respondents. We aimed to recruit 1,000 responders in total.  
36 The sample size required depends on the number of predictors, the expected effect size  
37 and the level of power. According to Miles and Shevlin [23], if we are expecting a small  
38 effect size, a sample size of 600 is considered adequate to achieve a high level of power  
39 of 0.8 (a benchmark suggested by Cohen [24]) for four predictors. As highlighted in  
40 Table 2 we can formulate at least four hypothesis, for example, people from a higher  
41 socio-economic group are more likely to donate biosamples than those from lower socio-  
42 economic group. With a sample size of 1,000, this study would provide highly reliable  
43 results. In order to reduce any on-line bias in our sample, 100 face-to-face interviews  
44 with non-internet users were conducted. An additional 'boost' sample of 100 people (not  
45 included in the main sample analysis) was also conducted with people from three  
46 minority ethnic groups ('Black', 'Chinese', 'S. Asian') so that we could conduct sub-group  
47 analysis between the groups.  
48  
49  
50  
51  
52  
53  
54  
55  
56  
57  
58  
59  
60



The survey questions were developed by the authors and piloted with 60 members of Research Now's online panel community who were from low SEG's. Members of the pilot group were then invited to take part in a subsequent telephone interview asking about the survey. Interviews were conducted with 25 pilot survey responders. Questions focused on question clarity, survey length and whether responders felt the survey to be neutral. Some minor amendments to wording were made in light of the responses. The main survey was then conducted in September 2012. Surveys recorded online took, on average, 17 minutes to complete and each responder received a small payment (around £2) from Research Now.

Survey data were organised and analysed using SPSS statistical software version 20 (Chicago, IL: SPSS Inc; 2011). Initial univariate descriptive statistics were obtained for the entire study. Pearson Chi-square was used to examine demographic factors associated with willingness to donate and preference for different consent models. Those associations that were found to be significant ( $p \leq 0.05$ ) were then entered into a multiple logistic regression to explore the predictivity of these variables. Before running the model, we tested for multicollinearity among the independent variables. No multicollinearity issues were found.

## RESULTS

### Study populations

Participant characteristics are detailed in Table 2.

Table 2: Participant characteristics

| Characteristic              | Focus group<br>N=81 | Survey<br>N=1110 |
|-----------------------------|---------------------|------------------|
| <b>Gender</b>               |                     |                  |
| Male                        | 33; 41%             | 504; 45%         |
| Female                      | 48; 59%             | 606; 55%         |
| <b>Age</b>                  |                     |                  |
| 18-24                       | 13; 16%             | 135; 12%         |
| 25-34                       | 18; 22%             | 184; 17%         |
| 35-44                       | 19; 23%             | 198; 18%         |
| 45-54                       | 10; 12%             | 184; 17%         |
| 55-64                       | 16; 20%             | 176; 16%         |
| 65+                         | 5; 6%               | 233; 21%         |
| <b>Socio-economic group</b> |                     |                  |
| A                           | 9; 11%              | 41; 4%           |
| B                           | 22; 27%             | 215; 19%         |
| C1                          | 24; 30%             | 311; 28%         |
| C2                          | 14; 17%             | 233; 21%         |
| D                           | 6; 7%               | 145; 13%         |
| E                           | 6; 7%               | 165; 15%         |
| <b>Region</b>               |                     |                  |
| East of England             | 7; 7%               | 92; 8%           |

|                       |         |          |
|-----------------------|---------|----------|
| East Midlands         | -       | 57; 5%   |
| London                | 18; 22% | 213; 19% |
| North East            | -       | 40; 4%   |
| North West            | -       | 121; 11% |
| Northern Ireland      | -       | 30; 3%   |
| Scotland              | 14; 17% | 76; 7%   |
| South East            | 14; 17% | 165; 15% |
| South West            | -       | 81; 7%   |
| Wales                 | -       | 51; 5%   |
| West Midlands         | 14; 17% | 94; 8%   |
| Yorkshire/Humberlands | 14; 17% | 90; 8%   |

**Ethnicity**

|                            |         |           |
|----------------------------|---------|-----------|
| White or White British     | 54; 67% | 1057; 95% |
| Mixed race                 | 1; 1%   | 7; 1%     |
| Asian or Asian British     | 10; 12% | 18; 2%    |
| Black or Black British     | 9; 11%  | 19; 2%    |
| Chinese or Chinese British | 7; 9%   | 2; 0%     |
| Other ethnic group         | 0; 0%   | 4; 0%     |
| Prefer not to say          | 0; 0%   | 3; 0%     |

**Religion**

|                   |  |          |
|-------------------|--|----------|
| Christianity      |  | 677; 61% |
| Islam             |  | 13; 1%   |
| Hinduism          |  | 6; 1%    |
| Sikhism           |  | 0; 0%    |
| Judaism           |  | 6; 1%    |
| Buddhism          |  | 11; 1%   |
| Other religion    |  | 15; 1%   |
| No religion       |  | 370; 33% |
| Prefer not to say |  | 12; 1%   |

**Religiosity**

|                      |  |          |
|----------------------|--|----------|
| Not at all religious |  | 234; 32% |
| Moderately religious |  | 422; 58% |
| Very religious       |  | 64; 9%   |
| Prefer not to say    |  | 8; 1%    |

**Education**

|                                                      |         |          |
|------------------------------------------------------|---------|----------|
| No formal qualification                              | 15; 19% | 70; 6%   |
| GCSE, O level, Scottish Standard Grade or equivalent | 19; 23% | 264; 24% |
| GCE, A-level, Scottish Higher or similar             | 17; 21% | 214; 19% |
| Vocational (BTEC/NVQ/Diploma)                        | -       | 230; 21% |
| Degree level or above                                | 30; 37% | 317; 29% |
| Prefer not to say                                    | -       | 15; 1%   |

**Self reported knowledge of medical research process**

|                |  |          |
|----------------|--|----------|
| No knowledge   |  | 463; 42% |
| Some knowledge |  | 603; 54% |
| Good knowledge |  | 44; 4%   |

**Have you been affected by a disability or illness?**

|     |  |          |
|-----|--|----------|
| Yes |  | 399; 36% |
| No  |  | 711; 64% |

**Has a close family member been affected by a disability or illness?**

|     |  |          |
|-----|--|----------|
| Yes |  | 767; 69% |
| No  |  | 343; 31% |

### Have you had blood or tissue removed during a medical procedure?

|            |          |
|------------|----------|
| Yes        | 446; 40% |
| No         | 553; 50% |
| Don't know | 111; 10% |

### Have you ever been asked to donate blood or tissue for medical research?

|            |          |
|------------|----------|
| Yes        | 182; 16% |
| No         | 904; 81% |
| Don't know | 24; 2%   |

### If so, did you agree to donate?

|            |          |
|------------|----------|
| Yes        | 155; 85% |
| No         | 23; 13%  |
| Don't know | 4; 2%    |

Note: percentages may not add up to 100 due to rounding.

### Focus groups

One hundred and eighty-two members of the public who were approached were eligible to participate (i.e. they fitted the criteria for a particular focus group) and 81 people agreed to participate (45% participation rate; 48 women, 33 men). There were seven participants in each focus group apart from the 18-25 age group and high SEG group (eight participants in each); serious/chronic illness group and healthy volunteers group (six participants in each) and the pilot group (five participants).

### Survey

Four thousand six hundred and seven people were invited to take part in the survey; 2014 did not respond, 860 began completing the survey but did not finish, 102 did not qualify to continue (e.g. they were under 18 years old), 521 qualified for the survey but the quota was full and 1110 completed the questionnaire (28% response rate excluding those who did not qualify and where the quota was full). This response rate is comparable to similar studies on this topic[16]. Our participant quotas closely, though not exactly, matched our targets based on the UK population data as provided by the ONS. For this reason we carried out both weighted and un-weighted analyses. There was no difference in the conclusions we reached by either method. In this paper we present the un-weighted results (weighted results can be found at supplementary data file Appendix V†).

### Importance of asking for consent

The majority of survey ~~and focus group~~ participants believed that obtaining consent for the use of residual biosamples was either extremely important (55%) or important (25%). Only 4% selected 'not at all important'. Focus group participants also saw the consent process as important and cited reasons including: Reasons as to why consent

~~was important, as cited by focus group participants, included~~ that it was “polite”, “respectful” and “morally correct” to ask permission; that it enabled people to feel they had made a contribution and an active choice; that it provided control, in particular for those people that might not want their biosamples to be used, for example for religious reasons; that taking without asking was akin to theft; and that it was important in order to maintain trust between patients and doctors.

*“It then doesn’t allow them to take liberties or advantage of the fact that you’re out cold having an operation and someone says ‘Oh we need a bit of that’.”* Male, patient – had operation in past 2 years.

A small minority did not feel that consent was important, the main reasons being that they did not want the tissue back, that once it was removed it no longer ‘belonged to them’, and that the tissue would just go to waste otherwise.

Survey participants were asked what would be their preferred method of consenting to donate leftover biosamples for research use. The majority (65%) wanted to do so face-to-face with a health professional; 15% wanted to complete a form and return it by post. This issue was not specifically addressed with focus group participants due to time constraints.

### **Preference for ‘opt-in’ or ‘opt-out’ consent**

Participants were asked whether they preferred an opt-in or opt-out model of consent for donating residual biosamples. The results of the survey showed that opt-in consent was preferred by over half of the participants (55%), 28% preferred opt-out, 14% had no preference and 4% selected ‘don’t know’. Participants who were significantly more likely to prefer opt-in consent were: from a low SEG (E) (79.8% vs. 64.1%,  $X^2=11.13(1)$ ,  $p=0.001$ ); over 65 years (75.1% vs. 64%,  $X^2=7.68(1)$ ,  $p=0.006$ ); had a religious affiliation (68.8% vs. 61.2%,  $X^2=4.84(1)$ ,  $p=0.028$ ); and had an education level of GCSE or lower (71.1% vs. 63.9%,  $X^2=3.89(1)$ ,  $p=0.048$ ). The strongest significant predictor for preferring opt-in consent was being from a low SEG (E) (OR=2.22, 95% CI 1.41-3.57,  $p=0.001$ ) followed by having a religious affiliation (OR=1.36, 95% CI 1.01-1.81,  $p=0.04$ ) (Table 3).

Table 3: Multiple logistic regression of participant preferences for consent models

| <b>Participant characteristic</b> | <b>Coefficient</b> | <b>95% CI</b> | <b>Odds ratio</b> | <b>p value</b> |
|-----------------------------------|--------------------|---------------|-------------------|----------------|
| Preference for opt-in consent     |                    |               |                   |                |
| Socio-economic group              | 0.806              | 1.41, 3.57    | 2.22              | 0.001          |
| Religion                          | 0.304              | 1.01, 1.81    | 1.36              | 0.04           |
| Preference for consent every time |                    |               |                   |                |
| Religion                          | 0.72               | 1.05, 4.00    | 2.04              | 0.036          |

|                                       |      |            |      |        |
|---------------------------------------|------|------------|------|--------|
| Age                                   | 0.47 | 1.07, 2.41 | 1.60 | 0.023  |
| Preference for specific consent       |      |            |      |        |
| Opt-in                                | 1.52 | 3.30, 6.35 | 4.58 | <0.001 |
| Ethnicity                             | 1.08 | 1.23, 7.14 | 2.94 | 0.015  |
| Preference for generic consent        |      |            |      |        |
| Opt-out                               | 1.52 | 3.13, 6.67 | 4.55 | <0.001 |
| Religion                              | 0.04 | 1.08, 2.72 | 1.56 | 0.021  |
| Knowledge of medical research process | 0.44 | 1.06, 2.28 | 1.56 | 0.024  |

Demographic items were excluded from this table if none was statistically significant. All variables were entered into the models as categorical variables.

CI: Confidence Interval.

Focus group participants preferred opt-out consent ( $n=46$ ; 57%) over opt-in consent ( $n=29$ ; 36%), with 6 participants (7%) unsure, after in-depth discussion around the benefits and disadvantages of each approach. The main benefit of opt-out consent cited by participants was that more biosamples would be available and consequently spur research. Other reasons included: that it would be less costly administratively; that it maximised the value of left over biosamples; that patients wouldn't have to consider it every time they were having an operation or blood test; that those that did not want to donate still had the opportunity to opt-out; and that it would 'normalise' donating leftover biosamples which would be a positive step.

*"It would an incentive for society if everyone knew that this is what happens routinely, but you can choose not to be involved. It would be more like 'that's normal'."* Male, aged 18-24 group

Those that preferred the opt-in approach cited the following reasons as to why: an active choice whereby participants had to act on a decision to take part was preferable to a passive choice whereby consent was assumed; it enabled people to have more control over their biosamples; it was truly 'informed consent' in the context of donating surplus samples for research (rather than as part of a clinical trial; clinical trials were outside the scope of the study) and hence more ethically acceptable; it enabled people to feel that they were making a positive contribution and would prevent the problem of vulnerable groups not being aware they were automatically 'opted-in'.

*"There are going to be members of the public who are not going to always be able to consider rationally themselves what it actually means."* Female, healthy volunteer

Whilst the majority of focus group participants overall preferred opt-out consent, the results were different for the three minority ethnic groups ("Black", "S. Asian", "Chinese"), where opt-in consent was favoured by the majority.

### **Consent once for life or consent every time**

1  
2  
3 The most prevalent system in current use for donating new biosamples that are surplus  
4 to clinical requirements in the UK is the opt-in approach, with potential donors being  
5 asked for consent every time a procedure is performed that may result in a biosample  
6 becoming available for research. (The law allows for the use of diagnostic archives for  
7 research without consent as long as certain criteria are met). Participants were therefore  
8 asked to consider variations on this model and state whether they preferred: (1) consent  
9 once for life, covering all subsequent biosamples, until or unless the donor decides to  
10 withdraw consent; (2) consent every time samples surplus to diagnostic requirements  
11 may become available, or (3) consent at certain points in life. Consent every time (43%)  
12 was preferred by the majority of survey participants, followed by consent at certain  
13 points (27%) and consent once for life, e.g. at aged 18, (21%). Seven percent had no  
14 preference and 2% didn't know. Groups who were significantly more likely to prefer  
15 consent every time compared to consent once for life were: under 55 years (70.3% vs.  
16 60.9%;  $X^2=5.88(1)$ ,  $p=0.015$ ); had no knowledge of the research process (72.3% vs.  
17 63.4%;  $X^2=5.77(1)$ ,  $p=0.016$ ); or were either not at all or moderately religious (70.2%  
18 vs. 51.3%;  $X^2=5.1(1)$ ,  $p=0.024$ ). When entered into the regression analysis, the  
19 strongest significant predictor for preferring consent every time was being not at all or  
20 moderately religious (OR=2.04; 95% CI 1.05-4.00,  $p=0.036$ ) followed by being under  
21 55 years (OR=1.60; 95% CI 1.07-2.41,  $p=0.023$ ) (Table 3).

22  
23 Unlike survey responders, focus group participants favoured consent once for life ( $n=35$ ;  
24 43%) followed by consent every time samples surplus to diagnostic requirements may  
25 become available ( $n=27$ ; 33%) and consent at certain points ( $n=16$ ; 20%) with three  
26 choosing don't know (4%). Like opt-out consent, consent once for life was seen to be  
27 better as it was "quicker" and "easier" administratively and prevented researchers from  
28 "losing out". Consent provided most control for participants as you would "know the  
29 specific purpose of it", particularly if the sample was considered to be sensitive e.g.  
30 eggs; allowed "no room for error"; and enabled people to change their mind easily.

31  
32  
33  
34  
35  
36  
37  
38  
39  
40  
41  
42  
43  
44  
45  
46  
47  
48  
49  
50  
51  
52  
53  
54  
55  
56  
57  
58  
59  
60  
*"You may feel differently [depending on] what tissue is being donated and for what purpose the research is being carried out."* Female, aged 18-24 group

Some participants had concerns about how consent preferences (e.g. what types of research they were willing to donate a biosample for), would follow them across the healthcare system if a 'consent once for life' model was adopted. Consent at certain points was seen by some as a good middle ground as patients would still have some control, but would not have to go through the consent process every time they had a medical procedure. Examples of consent at certain points included every "five or ten

years", or at the beginning of particular episodes of care such as pregnancy or cancer treatment.

### **Models of consent for research use of biosamples**

Survey participants were presented with four consent models (Table 1), and asked whether they would consider consenting residual biosamples to each of them, providing the research had been approved by a research ethics committee (described as a committee usually made up of doctors, scientist, patients and the general public which ensure any research allowed to be done is for the benefit of patients). Eighty percent would agree to specific consent – once only; 77% would consent to specific consent – for every new study; 71% would agree to tiered consent; and 67% of participants would agree to generic consent. When asked which model they preferred, specific consent - for every new study, was the first choice amongst those who had a preference (30% of participants overall), followed by generic consent and specific consent- once only, jointly second (both 18%), and lastly tiered consent (14%). Sixteen percent had no preference and 6% didn't know.

After collapsing the two specific consent models together (specific consent - for every new study and specific consent – once only), those participants who preferred specific consent were significantly more likely to: have a religious affiliation (63.9% vs. 48.9%,  $X^2=16.88(1)$ ;  $p<0.001$ ); live in the North East or Scotland (60.9% vs. 42.7%,  $X^2=10.23(1)$ ,  $p=0.001$ ); be over 65 years (67.1% vs. 57.1%,  $X^2=5.31(1)$ ,  $p=0.021$ ); and be of a non-'White' ethnicity (68.9% vs. 58%,  $X^2=4.17(1)$ ,  $p=0.041$ ). Using the boost sample we found that 'Black' participants were significantly more likely to prefer specific consent models compared with 'White' participants (75.6% vs. 58%,  $X^2=4.31(1)$ ,  $p=0.038$ ). Those people who preferred opt-in consent were also more likely to prefer specific consent models (71.1% vs. 35.3%,  $X^2=91.72(1)$ ,  $p<0.001$ ). The strongest significant predictor for preferring specific consent was preferring opt-in consent (OR=4.58, 95% CI 3.30-6.35,  $p<0.001$ ) followed by being of non-'White' ethnicity (OR=2.94, 95% CI 1.23-7.14,  $p=0.015$ ) (Table 3).

We also looked at who was most likely to prefer generic consent, the least restrictive of the proposed consent models. Those that preferred generic consent were significantly more likely to: have no religious affiliation (51.1% vs. 36.1%,  $X^2=15.97(1)$ ,  $p<0.001$ ); have some or good knowledge of the medical research process (26.1% vs. 18.3%,  $X^2=6.79(1)$ ,  $p=0.009$ ); be male (26.8% vs. 19.9%,  $X^2=5.40(1)$ ,  $p=0.02$ ); and be from a higher SEG group (A-D) (24.3% vs. 15.1%,  $X^2=4.66(1)$ ,  $p=0.031$ ). They were also significantly more likely to prefer opt-out consent (64.7% vs. 28.9%,  $X^2=91.72(1)$ ,  $p<0.001$ ). The strongest significant predictor for preferring generic consent was



1  
2  
3 preferring opt-out consent (OR=4.55, 95% CI 3.13-6.67,  $p<0.001$ ) followed by having  
4 no religious affiliation (OR=1.56, 95% CI 1.08-2.72,  $p=0.021$ ) and some or good  
5 knowledge of the medical research process (OR=1.56, 95% CI 1.06-2.28,  $p=0.024$ )  
6 (Table 3).  
7  
8

9  
10 Focus group preferences differed from those of survey responders with generic and  
11 tiered consent being equally popular (n=36; 44% and n=35; 43% respectively). Specific  
12 consent – once only, was least popular (n=6; 7%) (this was the only specific consent  
13 model given to participants). Four participants (5%) didn't know. Generic consent was  
14 valued as it provides most "flexibility for researchers"; reduces the likelihood residual  
15 biosamples will go to waste; is more straightforward to put in place; is "simpler to  
16 understand"; and enables biosamples to be used for more than "one specific thing".  
17  
18

19  
20  
21 *"It's better not to restrict the possible use of the sample because by restricting it you're*  
22 *increasing the chance that it'll go to waste. You want the highest probability that*  
23 *something good will come from it."* Male, patient – affected by a condition  
24

25  
26 It was also the consent model favoured by all participants who were affected by an  
27 illness or disability.  
28

29  
30 Tiered consent was ~~also~~ valued because it provided more control over donated  
31 biosamples than generic consent, allowing people to opt-out of certain types of research,  
32 and therefore provided "clarity and peace of mind". All but one participant in the 'Black'  
33 focus group and all participants who had donated biosamples as healthy volunteers  
34 preferred tiered consent. Whilst specific consent was seen to provide the most control  
35 and enabled participants to have "some understanding of what it might be used for",  
36 concerns raised were that it "can't be used for anything else", "could be wasted" and  
37 would require a time-consuming explanation from health professionals.  
38  
39

40  
41  
42  
43 In both the survey and focus groups, the donation of potentially sensitive biosamples  
44 produced a preference for specific consent. In the survey, a quarter (25%) preferred  
45 specific consent – for every new study, 22% preferred specific consent – once only, 12%  
46 preferred generic consent and 9% preferred tiered consent. Nineteen percent had no  
47 preference and 13% didn't know. When discussing donation of eggs, one woman  
48 commented:  
49  
50

51  
52  
53 *"People could reproduce a child or whatever and it's about the personal-ness of what's*  
54 *been taken from you. So if it's a bit of blood, yeah take it, I mean you just cut yourself*  
55 *and blood is gone, but if it's something that's quite personal you only have every now*  
56 *and again, that needs to be guarded."* Female, 'Black' ethnicity group  
57  
58  
59  
60



1  
2  
3  
4 We asked survey participants whether they would like to be kept up-to-date with  
5 research going on at a particular hospital or biobank to which they had donated a  
6 biosample. Eighty-five percent said they would be interested; the most popular methods  
7 to receive updates were via a website (27%), email (27%) or letter (22%).  
8  
9

## 10 11 **DISCUSSION**

12  
13  
14 This study contributes further to our understanding of the UK public's views and  
15 preferences towards consent for the use of biosamples in medical research. In summary,  
16 we have found that: 1) the consenting process was perceived as important in order to  
17 maintain trust between patients and health professionals and respect patient autonomy;  
18 2) survey participants exhibited a desire to retain active choice and control when  
19 donating biosamples and over the uses to which their biosamples might be put, and 3)  
20 these results differ from those reported during focus group discussions, where  
21 preference was for less restrictive consent models that are likely to increase availability  
22 of biosamples. These differences might be accounted for by the fact that focus group  
23 participants were given more background information about the use of residual  
24 biosamples in research and had time to consider the benefits and disadvantages of the  
25 different approaches. These interventions may have allayed any anxieties participants  
26 had about relinquishing control of their biosamples and seem to have encouraged  
27 participants to choose approaches that maximised biosample access to researchers,  
28 highlighting the importance and potential impact of education on influencing public  
29 perception in this area.  
30  
31  
32  
33  
34  
35  
36  
37

38 The preference for opt-in consent identified in the survey is consistent with the results of  
39 other studies in this area[3,15,16]. One reason for this preference may be that it  
40 matches the current system for organ donation for transplant in the UK. It was also  
41 perceived as being truly informed consent by some participants (although it is worth  
42 noting that it is the information provided to potential donors that guarantees consent is  
43 informed rather than the consent mechanism). Nevertheless, the sizeable number of  
44 survey responders who preferred opt-out consent (27%) coupled with the preference for  
45 opt-out amongst focus group participants (57%) does suggest that there may be  
46 broader support than previously believed for this approach. This point is also supported  
47 by the finding that fewer than half of survey participants wanted to be consented every  
48 time a sample was taken and nearly 30% preferred consent at certain points. Alternate,  
49 more streamlined approaches to consenting should therefore be considered and  
50 evaluated. Interestingly, our results showed that preference for opt-out consent was  
51 associated with being younger (under 65 years), from a higher SEG and a higher  
52  
53  
54  
55  
56  
57  
58  
59  
60

1  
2  
3 education level. These demographic groups may be more trusting of medical institutions  
4 to use residual biosamples appropriately, or perhaps feel empowered to be able to opt-  
5 out if so desired, for example, online. Similar findings have been reported in relation to  
6 organ donation; a study by Gimbel et al. found an association between cadaveric  
7 donation rate and percentage of the population enrolled in third-tier education[25].  
8 Internet access has also been found to correlate with increased organ donation[26].  
9  
10

11  
12 Concerning consent models for research use of biosamples, the majority of people (69%)  
13 were willing to donate biosamples via the least restrictive model, generic consent. A  
14 study conducted in Sweden found a similar percentage of the general public were happy  
15 to agree to generic consent (67%), whereby surrogate decisions were performed by a  
16 research ethics committee[27]. Other national studies have found the acceptability of  
17 generic consent amongst the general public and in particular patients to be higher,  
18 between 79%-95%[4,28-31]. Nevertheless, our survey findings suggest that willingness  
19 to donate increased where greater choice and control over research participation is  
20 retained, although the difference between those who were willing to agree to generic  
21 compared to specific was only 13%. Similarly, when survey responders were asked  
22 about their preferred approach, their preference was also for specific consent for every  
23 new study that might be conducted using their biosample. This may indicate a general  
24 interest in how samples are being used. This notion is supported by the high number of  
25 people who wanted ongoing contact about the research leading from their donation.  
26 Moreover, they may have not considered the practicalities of being asked to consent  
27 every time their sample is used, and the high level of recontact they might receive from  
28 research teams. Nevertheless, it is important to take note of the fact that more tailored  
29 forms of consent represent an attractive approach to many people. While specific  
30 consent may be practical for individual research projects, this restriction would make  
31 biobanking challenging, as biobanks exist to facilitate access to samples for a wide  
32 variety of approved research projects without the need for additional consent. It may be  
33 that as more sophisticated biosample tracking and management systems are adopted,  
34 resources could become available to support more interactive forms of consent, and  
35 more biobanks could offer tiered consent, for example. Further public dialogue and  
36 information about the use of the samples may also provide the same assurances for  
37 people that arise from specific consent, as highlighted by the preference for less  
38 restrictive consent models amongst focus group participants.  
39  
40  
41  
42  
43  
44  
45  
46  
47  
48  
49  
50  
51

52  
53 Evidence from other empirical studies looking at preferences for consent models is  
54 mixed. UK studies focusing on donations purely for research by 'healthy volunteers' to  
55 biobanks (i.e. not donating residual biosamples) have identified a preference for specific  
56 consent,[19,32] as did a study conducted in the USA that also focused on healthy  
57  
58  
59  
60

1  
2  
3 volunteers[15]. In a pan-European survey, the majority of the UK public also preferred  
4 specific consent for every new study, although the percentage that did was slightly lower  
5 than the overall European average (65% compared to 67%)[33]. It was, however,  
6 higher than in Denmark and Finland, where the percentage of people who wanted to be  
7 re-contacted for every new study was lower at 51% and 54% respectively. These  
8 countries were also found to have very few concerns about the collection of personal  
9 information by biobanks and had high levels of trust in ethics committees. Other  
10 empirical work conducted in the USA, Canada, and Sweden and Spain has shown that  
11 public preference is for generic consent[3,16,18,34,35]. These findings highlight the  
12 divergence of opinion on this issue, in particular in different contexts and with different  
13 information provision, although the difficulty of comparing across studies with different  
14 methodologies and backgrounds must also be taken into account. Notably, where  
15 participants had some or good knowledge of the research process and where there was  
16 in-depth discussion (i.e. during focus groups), participants were more likely to prefer  
17 generic consent, a finding that has also been identified elsewhere in the literature[36]  
18 and supports the need for information and education if increasing the acceptability of  
19 generic consent is deemed desirable. Focus group participants affected by an illness or  
20 disability were also found to prefer generic consent, and is likely to reflect the fact that  
21 they have greater interests at stake[37]. Preference for specific consent was ~~also~~ found  
22 to be associated with being over 65 years and from a non-'White' ethnicity, findings  
23 which resonate with other studies[3,38,39]. Consent documentation and written  
24 information targeted specifically at these particular groups may also help alleviate any  
25 specific concerns these groups may have.  
26  
27  
28  
29  
30  
31  
32  
33  
34  
35  
36

37 This research into current public attitudes regarding biosample donation in the UK  
38 provides valuable guidance for biobanking governance. Whilst generic consent is the  
39 model largely endorsed by regulators and funders in the UK[9,11], the evidence from  
40 this study suggests that there is a need to address the potential concerns that some  
41 people may have about the minimal information and lack of control provided through  
42 this model. Education and opportunity for discussion may be one way to allay concerns,  
43 as demonstrated through focus groups. Keeping donors informed of current research  
44 taking place at the hospital or research institutions to which they donated also appears  
45 to be desirable and is likely to be both motivating and promote public trust and  
46 confidence in the research process, a finding reported elsewhere[40]. The opportunity  
47 for face-to-face discussion with an appropriately trained healthcare professional at the  
48 time of donation may also allay any potential concerns, and is indeed the approach  
49 usually taken in the UK at present. This approach has been found to yield high  
50 acceptance rates amongst patients of well over 90%[41-43].  
51  
52  
53  
54  
55  
56  
57  
58  
59  
60

### Strengths and Limitations

This was a mixed methods study to explore public views and preferences towards consent for biosample donation. Integrating quantitative and qualitative approaches is valuable in exploratory research as it can strengthen the inferences made through triangulation and allow for a more nuanced understanding of the topic[44]. This study presented participants with a series of hypothetical questions about their preferences and willingness to donate residual biosamples for medical research. By presenting questions as 'real life' scenarios, we hoped to make the questions as realistic as possible. However, as with any hypothetical scenario, the findings may not necessarily correlate with actual behaviour.

The questions for both the focus groups and the survey were piloted to ensure they were clear and understandable and were not biased towards any particular viewpoint. Nevertheless, many of the issues covered were complex, particularly around the meaning of the different consent models which may have contributed to the dropout rate. Focus groups participants were not presented with the option of 'specific consent – for every new study' (they were only given 'specific consent – once only'). This may have been an attractive option for some given that a concern raised was biosamples being wasted. However, given that the key reasons participants' valued generic consent were because it provided most flexibility to researchers and was most straightforward to administer, this seems unlikely. In addition, given time and resource constraints we were unable to explore whether 'stronger' consent models would have been preferable for organisations that donors trusted less. This is an area that would be worth exploring further in future research. Participants who did complete the survey may have done so because of strong feelings about the issues raised and this may have skewed the results; however, every effort was made to ensure that the results were as representative of the UK population as possible. The focus groups and survey were conducted in English and so the findings may not be representative of non-English speaking members of the general public. Future research might target these particular groups.

### CONCLUSION

There is a general willingness amongst the UK population to donate biosamples for medical research. Our research suggests that there is a preference amongst the UK public for more information on the uses and outcomes of research, and ongoing choice and control over donated biosamples. Our study also supports the premise that increased knowledge and opportunity for discussion is associated with acceptance of less restrictive consent models.

1  
2  
3  
4  
5 **Acknowledgements** We would like to thank Lisa Bennett, Sarah Dickson, Catherine  
6 Elliott, James Ironside and Chris Womack and for their helpful comments on this paper;  
7 Sarah Dickson, Jim Elliott and Neil Formstone for their contribution to the design of the  
8 study; and Samantha Reeve and Zheng Lei for help with data analysis.  
9

10  
11 **Funding statement** This work was supported by a grant from the Technology Strategy  
12 Board through the Stratified Medicines Competition grant number 101021, direct  
13 financial contributions by AstraZeneca and resource in kind by AstraZeneca,  
14 GlaxoSmithKline and Lab 21.  
15  
16

17  
18 **Competing interests:** Lesley Stubbins is an employee of GlaxoSmithKline. Mark  
19 Robertson is an employee of AstraZeneca.  
20

21  
22 **Contributors:** J.C. conceived the study. All authors contributed to the study design. In  
23 addition to all the authors, Sarah Dickson, Jim Elliott and the late Neil Formstone also  
24 contributed towards the design of the study and development of the focus group and  
25 survey questions. C.L. facilitated the focus groups. Focus group recruitment was  
26 conducted by the company The Focus Group; the survey was conducted through the  
27 market research company Research Now. C.L. conducted data analysis and  
28 interpretation with the help of Samantha Reeve and Zheng Lei. The initial draft of the  
29 manuscript was prepared by C.L and then circulated repeatedly among the authors for  
30 critical revision. All authors approved the final manuscript.  
31  
32  
33  
34

35  
36 **Ethical approval** This study was approved by the Ethics Review Board of the University  
37 of Manchester, reference 11459.  
38

39  
40 **Data sharing statement** Transcripts from the focus groups and full results of the  
41 survey are available from CL at [celine@geneticalliance.org.uk](mailto:celine@geneticalliance.org.uk). Supplementary material is  
42 also available at [www.geneticalliance.org.uk/projects/stratum\\_docs.htm](http://www.geneticalliance.org.uk/projects/stratum_docs.htm)  
43  
44  
45  
46

## 47 REFERENCES

- 48  
49  
50 1. Oosterhuis JW, Coebergh JW, van Veen EB. Tumour banks: well-guarded treasures in  
51 the interest of patients. *Nature reviews. Cancer* 2003;**3**:73-7.  
52  
53 2. Elger BS, Caplan AL. Consent and anonymization in research involving biobanks:  
54 differing terms and norms present serious barriers to an international framework.  
55 *EMBO reports* 2006;**7**:661-6.  
56  
57  
58  
59  
60

- 1  
2  
3 3. Murphy J, Scott JCGC, Kaufman D, et al. Public Perspectives on Informed Consent for  
4 Biobanking. *American Journal of Public Health* 2009;**99**:2128-34.
- 5  
6 4. Wendler D. One-time general consent for research on biological samples. *BMJ*  
7 2006;**332**:544-7.
- 8  
9 5. Allen J, McNamara B. Reconsidering the value of consent in biobank research.  
10 *Bioethics* 2011;**25**:155-66.
- 11  
12 6. Department of Health. The Human Tissue Act. 2004  
13 [http://www.dh.gov.uk/prod\\_consum\\_dh/groups/dh\\_digitalassets/@dh/@en/docu](http://www.dh.gov.uk/prod_consum_dh/groups/dh_digitalassets/@dh/@en/documents/digitalasset/dh_4103686.pdf)  
14 [ments/digitalasset/dh\\_4103686.pdf](http://www.dh.gov.uk/prod_consum_dh/groups/dh_digitalassets/@dh/@en/documents/digitalasset/dh_4103686.pdf) Accessed 11 November 2011.
- 15  
16 7. Hansson MG, Dillner J, Bartram CR, et al. Should donors be allowed to give broad  
17 consent to future biobank research? *Lancet Oncol* 2006;**7**:266-9.
- 18  
19 8. Hoeyer K. Donors perceptions of consent to and feedback from biobank research:  
20 Time to acknowledge diversity? *Public Health Genomics* 2010;**13**:345-52.
- 21  
22 9. Human Tissue Authority. Consent exemptions from the Human Tissue Act 2004  
23 <http://www.hta.gov.uk/licensingandinspections/consentexemptions.cfm> Accessed  
24 26 February 2013.
- 25  
26 10. Integrated Research Application System. Guidance document for researchers.  
27 [https://www.myresearchproject.org.uk/Help/Help%20Documents/PdfDocuments/](https://www.myresearchproject.org.uk/Help/Help%20Documents/PdfDocuments/researchtissuebank.pdf)  
28 [researchtissuebank.pdf](https://www.myresearchproject.org.uk/Help/Help%20Documents/PdfDocuments/researchtissuebank.pdf) Accessed 25 February 2013.
- 29  
30 11. Medical Research Council (MRC) and National Cancer Research Institute (NCRI). UK  
31 Funders' Vision for Human Tissue Resources, September 2011.
- 32  
33 12. Nuffield Council on Bioethics. Human bodies: donations for medicine and research.  
34 2011 [http://www.nuffieldbioethics.org/sites/default/files/Donation\\_full\\_report.pdf](http://www.nuffieldbioethics.org/sites/default/files/Donation_full_report.pdf)  
35 Accessed 26 February 2013.
- 36  
37 13. Petrini C. "Broad" consent, exceptions to consent and the question of using biological  
38 samples for research purposes different from the initial collection purpose. *Social*  
39 *Science and Medicine* 2010;**70**:217-20.
- 40  
41 14. Tupasela A, Sihvo S, Snell K, et al. Attitudes towards biomedical use of tissue sample  
42 collections, consent, and biobanks among Finns. *Scandinavian Journal of Public*  
43 *Health* 2010;**38**:46-52.
- 44  
45 15. Kaufman D, Bollinger J, Dvoskin R, et al. Preferences for opt-in and opt-out  
46 enrollment and consent models in biobank research: a national survey of  
47 Veterans Administration patients. *Genetics in medicine : official journal of the*  
48 *American College of Medical Genetics* 2012;**14**:787-94.
- 49  
50 16. Simon CM, L'Heureux J, Murray JC, et al. Active choice but not too active: Public  
51 perspectives on biobank consent models. *Genetics in Medicine* 2011;**13**:821-31.
- 52  
53  
54  
55  
56  
57  
58  
59  
60

17. Willison DJ, Swinton M, Schwartz L, et al. Alternatives to project-specific consent for access to personal information for health research: insights from a public dialogue. *BMC Med Ethics* 2008;**9**:18.
18. Kettis-Lindblad Å, Ring L, Viberth E, et al. Perceptions of potential donors in the Swedish public towards information and consent procedures in relation to use of human tissue samples in biobanks: A population-based study. *Scandinavian Journal of Public Health* 2007;**35**:148-56.
19. Shickle D, Hapgood R, Carlisle J, et al. Public attitudes to participating in UK Biobank. A public consultation on issues relating to feedback, consent, withdrawal and access: School of Health and Related research (SchARR). University of Sheffield, 2003.
20. Haddow G, Cunningham-Burley S, Murray L. Can the governance of a population genetic data bank effect recruitment? Evidence from the public consultation of Generation Scotland Public Underst Sci 2011117-29.
21. Start RD, Brown W, Bryant RJ, et al. Ownership and uses of human tissue: Does the Nuffield bioethics report accord with opinion of surgical inpatients? *BMJ* 1996;**313**:1366-68.
22. Ipsos MORI Social Research Institute. Human Tissue Authority General Public Survey. 2010 [http://www.hta.gov.uk/db/documents/2007-09-10\\_Ipsos\\_MORI\\_general\\_public\\_qual\\_and\\_quant\\_report\\_final\\_200709101952.pdf](http://www.hta.gov.uk/db/documents/2007-09-10_Ipsos_MORI_general_public_qual_and_quant_report_final_200709101952.pdf) Accessed 26 February 2013.
23. Miles JN, Shevlin M. *Applying regression and correlation: a guide for students and researchers*. London: Sage, 2001.
24. Cohen J. *Statistical power analysis for the behavioural sciences* 2nd ed. New York: Academic Press, 1988.
25. Gimbel RW, Strosberg MA, Lehrman SE, et al. Presumed consent and other predictors of cadaveric organ donation in Europe. *Prog Transplant* 2003;**13**:17-23.
26. Rithalia A, McDaid C, Suekarran S, et al. Impact of presumed consent for organ donation on donation rates: a systematic review. *BMJ* 2009;**338**:a3162.
27. Hoeyer K, Olofsson B-O, Mjörndal T, et al. Informed consent and biobanks: a population-based study of attitudes towards tissue donation for genetic research. *Scandinavian Journal of Public Health* 2004;**32**:224-29.
28. McQuillan GM, Porter KS, Agelli M, et al. Consent for genetic research in a general population: the NHANES experience. *Genetics in medicine : official journal of the American College of Medical Genetics* 2003;**5**:35-42.



- 1  
2  
3 29. Hoeyer K, Olofsson BO, Mjorndal T, et al. The ethics of research using biobanks:  
4 Reason to question the importance attributed to informed consent. Archives of  
5 Internal Medicine 2005;**165**:97-100.
- 6  
7 30. Stegmayr B, Asplund K. Genetic research on blood samples stored for years in  
8 biobanks. Most people are willing to provide informed consent. Lakartidningen  
9 2003;**100**:618-20.
- 10  
11 31. Malone T, Catalano PJ, O'Dwyer PJ, et al. High rate of consent to bank biologic  
12 samples for future research: the Eastern Cooperative Oncology Group experience.  
13 Journal of the National Cancer Institute 2002;**94**:769-71.
- 14  
15 32. Gaskell G, Gottweis H, Starkbaum J, et al. Publics and biobanks: Pan-European  
16 diversity and the challenge of responsible innovation. Eur J Hum Genet 2012.
- 17  
18 33. TNS Opinion & Social on request by the European Commission. Eurobarometer 73.1:  
19 Biotechnology. 2010  
20 [http://ec.europa.eu/public\\_opinion/archives/ebs/ebs\\_341\\_en.pdf](http://ec.europa.eu/public_opinion/archives/ebs/ebs_341_en.pdf) Accessed 15  
21 May 2013.
- 22  
23 34. Master Z, Claudio JO, Rachul C, et al. Cancer patient perceptions on the ethical and  
24 legal issues related to biobanking. BMC Med Genomics 2013;**6**:8.
- 25  
26 35. Valle-Mansilla JI, Ruiz-Canela M, Sulmasy DP. Patients' attitudes to informed consent  
27 for genomic research with donated samples. Cancer investigation 2010;**28**:726-  
28 34.
- 29  
30 36. Gaskell G, Gottweis H. Biobanks need publicity. Nature 2011;**471**:159-60.
- 31  
32 37. Tupasela A, Snell K. National interests and international collaboration: tensions and  
33 ambiguity among Finns towards usages of tissue samples. New Genetics and  
34 Society 2012;**31**:424-41.
- 35  
36 38. Nilstun T, Hermeren G. Human Tissue Samples and Ethics. Medicine, Health Care  
37 and Philosophy 2006;**9**:81-86.
- 38  
39 39. Ma Y, Kong X, Dai H, et al. Attitudes towards biosample donation in andrology  
40 patients. International journal of andrology 2012;**35**:170-5.
- 41  
42 40. Haddow G, Cunningham-Burley S, Bruce A, et al. Generation Scotland: consulting  
43 publics and specialists at an early stage in a genetic database's development.  
44 Critical Public Health 2008;**18**:139-49.
- 45  
46 41. Jack AL, Womack C. Why surgical patients do not donate tissue for commercial  
47 research: review of records. BMJ 2003;**327**:262.
- 48  
49 42. Bryant RJ, Harrison RF, Start RD, et al. Ownership and uses of human tissue: what  
50 are the opinions of surgical in-patients? Journal of clinical pathology  
51 2008;**61**:322-26.
- 52  
53 43. Wheeler J, Agarwal M, Sugden J, et al. Experiences from the front-line routine  
54 consenting of surplus surgically removed tissue: without investment by the  
55  
56  
57  
58  
59  
60



1  
2  
3 National Health Service fully informed consent for all is not available. *J Clin Pathol*  
4 2007;**60**:351-4.  
5

- 6 44. Teddlie C, Tashakkori A. *Foundations of Mixed Methods Research: Integrating*  
7 *Quantitative and Qualitative Approaches in the Social and Behavioral Sciences.*  
8 Thousand Oaks, California: Sage Publications, Inc., 2009.  
9  
10  
11  
12  
13  
14  
15  
16  
17  
18  
19  
20  
21  
22  
23  
24  
25  
26  
27  
28  
29  
30  
31  
32  
33  
34  
35  
36  
37  
38  
39  
40  
41  
42  
43  
44  
45  
46  
47  
48  
49  
50  
51  
52  
53  
54  
55  
56  
57  
58  
59  
60



**Genetic Alliance UK**  
Supporting. Campaigning. Uniting.

MANCHESTER  
1824

The University  
of Manchester

## Appendix 1

### Attitudes Towards Donating Human Tissue Samples for Research Participant Information Sheet

We would like to invite you to take part in a research study to help us understand what people think about donating human biological samples, (such as blood, saliva, types of blood tissues such as lung tissue, liver tissue) or tissue (e.g. lung tissue, saliva), or post mortem tissue, for medical research. These samples could be left over from a surgical procedure or they may be donated specifically for research purposes. Currently, we know very little about what people think about this issue. Please take the time to read the following information to help you decide whether you would like to take part.

**Who will conduct this research?** The research is part of the STRATUM project, a project set up to try to increase the effectiveness of tissue sample provision in the UK. It is being conducted with the help of a national charity, Genetic Alliance UK that represents over 150 patient organisations. The Focus Group are a reputable research company helping us to recruit members of the public. This study has received ethics approval from Manchester University.

**What is the aim of this research?** The aim is to understand what people think about donating human tissue samples for medical research.

**Why have I been chosen?** As a member of the public, your views are important. Your views will help us understand people's opinions and ensure that the donation of biological samples for medical research is carried out in a way that reflects people's wishes.

**What would I be asked to do if I took part?** We are inviting you to attend a group discussion to discuss your opinions about donating tissue samples for medical research. Don't worry if you feel you don't know a lot about this topic because discussions will be led by a trained moderator. We have provided some basic information along with this sheet that gives you some background about the topic. There are no right or wrong views; everyone's opinions will be equally valid.

Page | 1

Genetic Alliance UK: Unit 4D, Leroy House, 436 Essex Road, London, N1 3QP  
020 7704 3141 [contactus@geneticalliance.org.uk](mailto:contactus@geneticalliance.org.uk) [www.geneticalliance.org.uk](http://www.geneticalliance.org.uk)

Charity registered in England and Wales (no. 1114195) and in Scotland (no. SC039299)  
For peer review only - <http://bmjopen.bmj.com/site/about/guidelines.xhtml>  
Company limited by guarantee, registration no: 05772999

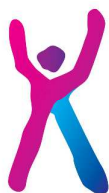

## Genetic Alliance UK

Supporting. Campaigning. Uniting.

**What happens to the data collected?** The information collected from these discussions will be used to write a report which will be used to

influence National policy. The findings will also be used to publish academic papers in journals.

**How is confidentiality maintained?** Discussions will be digitally recorded so that we can get an accurate account of what was said. However, when these are typed up, all comments will be anonymous and your name will not appear anywhere on the document. The documents will be kept secure on an encrypted hard drive and backed up on an encrypted memory stick which will be kept in a locked office. These documents and the audio files will be kept for 5 years and then destroyed. This information will not be passed on to any other third party.

**What happens if I do not want to take part or if I change my mind?** It is up to you whether or not to take part. If you do decide to take part you will be asked to sign a consent form saying that you have agreed to take part and have the conversation recorded. If you decide to take part you are still free to withdraw at any time without giving a reason and without detriment to yourself.

**Will I be paid for taking part?** As a thank you for taking part you will be given £50 which will be given at the end of the discussion.

**What is the duration of the research?** There will be between 6-8 people in the group which will last approximately 1.5 hours.

**Where will the research be conducted?**

**What are the benefits from me taking part?** There is no direct benefit to yourself from taking part, but your views will help to shape future policy.

**Who will be running the group?** The person running the focus group is Celine Lewis, who is a researcher with Genetic Alliance UK. If you have any concerns or questions about taking part in this research before the group then please contact Celine on 0207 704 3141. If you have agreed to take part and then find nearer the time you are no longer able to make the group then please contact the person who recruited you directly so that you can be replaced.

**What if something goes wrong?** In the unlikely event that you want to make a complaint about the conduct of the research, or would like help or advice following the discussion, you can contact the head of the project, Julie Corfield:

Email: [juliecorfield@areteva.com](mailto:juliecorfield@areteva.com)

Tel: 0115 812 0008

Many thanks,

**Celine Lewis**

Page | 2

Genetic Alliance UK: Unit 4D, Leroy House, 436 Essex Road, London, N1 3QP  
020 7704 3141 [contactus@geneticalliance.org.uk](mailto:contactus@geneticalliance.org.uk) [www.geneticalliance.org.uk](http://www.geneticalliance.org.uk)

Charity registered in England and Wales (no. 1114195) and in Scotland (no. SC039299)  
For peer review only - <http://bmjopen.bmj.com/site/about/guidelines.xhtml>  
Company limited by guarantee, registration no: 05772999

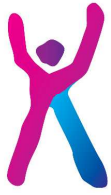

**Genetic Alliance UK**  
Supporting. Campaigning. Uniting.

## Appendix II

# Donating biological samples for medical research

### Introduction

Medical research is necessary to improve our understanding of what keeps us healthy and how diseases start and progress. It also means scientists can develop new and improved treatments.

Body fluid (such as blood, saliva, urine) and human tissue (such as fat, cancer tumours or muscle) are often used in scientific and medical research. Types of research that need body fluid and human tissue include:

- Looking at how the body works to fight disease.
- Testing new treatments for conditions such as heart disease and diabetes.
- Developing tests for different types of cancer.
- Researching how certain types of cells could be used to treat conditions like Parkinson's disease, Alzheimer's disease and multiple sclerosis.

Many of the tests and treatments used today resulted from people donating body fluid and human tissue (often called 'samples') for research years ago.

### How are human samples collected?

There are a number of ways that human samples can be collected:

- Samples may be left over after surgery. Tissue may be removed during surgery so tests can be done on the tissue or to stop the diseased tissue spreading to other parts of the body. After any necessary tests have been done on the tissue, there may be some left over. This left over tissue may be destroyed or used for medical research.
- Samples may be left over from a medical test such as a blood test.
- Samples might be donated specifically for medical research.
- A person may give permission (known as 'consent' or 'authorisation') for a sample to be taken and used for research in the event of their death.
- A person's family may give permission for the person's organs, which would have been donated for transplant, to be used for research if they are not suitable for transplant or a suitable recipient is not available.

The collection and use of samples is tightly governed by law in the UK. The removal of samples from a person is always done with the donor's permission, and any research first has to be approved by a research ethics committee. This committee is usually made up of doctors, scientist, patients and the general public, and ensures any research allowed to be done is for the benefit of patients. In specific circumstances the law allows samples that have already been collected to be used for another purpose, as long as the donor cannot be identified and the use has been approved by an ethics committee.

### What is done with the sample once it is collected?

Samples may be collected by a researcher and used immediately, or they may be collected for research purposes and kept. This may be in a researcher's laboratory or it may be in a storage place specifically for samples, known as a biobank.

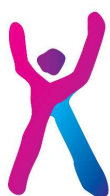

## Genetic Alliance UK

Supporting. Campaigning. Uniting.

The biobank keeps the samples so they can be used by scientists for research. In other words, biobanks are a little like libraries of samples, and only a research team can use them if they have the appropriate approval. A biobank has to follow regulations and have a licence, granted by the Human Tissue Authority (a UK Government organisation), to be able to store human tissue samples for research.

These systems ensure that any research respects the privacy of the people who donated the samples and that the research is of benefit to society. In many cases, it can be very important to have a patient's medical records along with their sample so that scientists can make sense of the results of their research. Any identifying information, such as names or addresses, is removed and not included with the sample.

### **How long is the biological sample kept?**

A sample may be used all at once. However, it is often the case that it won't all be used in one go. Therefore the sample may be stored and used over many years so that research can be done on it well into the future.

### **What are the benefits from donating biological samples to medical research?**

The person donating the sample is unlikely to benefit directly from the research, as it can take many years for the research on samples to produce new treatments or cures for diseases. Nevertheless, donors often see a benefit from knowing that they have personally helped medical research.

## **Genetic Alliance UK 2012**

### **The following information was used during the making of this leaflet:**

"Donating samples for research; Patient information" – Central England Haemato-Oncology Research Biobank

"Donating your tissue for research"- Human Tissue Authority

"Active choice but not too active: Public perspectives on biobank consent models" Simon et al. 2011; Genetics in Medicine

## Appendix III

## Focus Group – Discussion Guide

**Introduction (5 minutes)**

*Thank them for coming*

*Aim of discussion – hear people’s views, there are no right or wrong opinions, disagreement OK*

*Participation voluntary*

*Confidentiality – all info anonymous, personal details will not be passed on to any third party*

*Get permission for recording to be taped – no names or identifying features used when typed up*

*Guidelines – talk one at a time; am interested in everyone’s views so will try and give everyone equal ‘airtime’; no wrong answers – be honest and open.*

*Turn mobile phones off*

*Go round room. Ask everyone to say their name and one of their favourite foods.*

**Research (30 minutes)**

On the information sheet you’ve been given, there is some general information about donating samples for research. Has everybody had a chance to read this information? (if not give participants a few minutes to read document). So, to summarise....*give a brief overview of information on the document.*

1. So to start off, does anyone have any questions about anything I’ve said so far?

So I’d like us to think now about the different types of samples someone might donate to medical research. Human biological samples can mean a variety of different things including body fluid such as blood, saliva and sperm, and human tissue such as fat, cancer tumours or muscle or even whole organs.

2. Do you think there are some types of samples which are more sensitive to give than others? Which ones? Why?

There are also various different ways that samples can be collected. They might be

- left over from routine procedures such as surgery;
- left over after a medical test such as a blood test;
- donated specifically for medical research, for example a cheek swab or an extra blood sample;
- donated after a person’s death;
- a person's organs e.g. heart or kidneys, which would have been donated for transplant, may be used for research if they are not suitable for transplant or a suitable recipient is not available. The relevant clinical data may also be included and reviewed after death.

3. I’d like us to go through each of these in turn and discuss whether you have concerns about any of these ways that samples might be collected and why. GO THROUGH AND PROBE EACH POINT SPECIFICALLY (AFTER GROUP DISCUSSION: ask participants to complete associated question on questionnaire)

4. Do you see donation of human samples for medical research and organ donation for transplant similarly or do you think they are different?

5. Thinking specifically about donating tissue or organs after one’s death, do you think if someone has indicated in writing that they are willing to donate these for research in the event of their death, their wishes can be overridden by their relatives?

Samples may be used for a variety of different types of research. This might include looking at how the body works to fight disease; testing new treatments for conditions such as heart disease and diabetes or developing ways of diagnosing earlier different types of cancer.

6. Are there any types of research you would not be happy for your sample to be used for? Why?

(AFTER GROUP DISCUSSION: ask participants to complete associated question on questionnaire)

There are many places where research is performed, such as universities, NHS, charities such as cancer research, government labs and pharmaceutical companies. These are all groups that do research & sometimes they collaborate with each other in order to make medical progress.

7. Do you have any concerns about any particular types of organisations using donated samples. Which if any, and why?

(AFTER GROUP DISCUSSION: ask participants to complete associated question on questionnaire)

8. What do you think about the organisations that conduct research on samples? Do you think they are generally doing a good thing for society? Do you have any concerns about what they do?

9. Institutions such as the government and ethics review committees make decisions about what research can and can't be done on human samples. Ethics review committees are usually made up of different experts such as of doctors, scientists, ethics experts and patients Do you generally trust these types of institutions to make decisions about what research can and can't be done using human tissue samples?

### Consent (40 minutes)

I'd like to now talk about getting permission, also known as consent, to use a person's sample for medical research. Most of us have probably had blood taken at some point and some of us will have had an operation. If we have blood taken for a test, there might be some blood left over after the test has been done. Similarly, tissue may be removed during an operation and there may be some left over after any necessary tests have been done on the tissue. So you would not have any additional tissue taken just for research purposes unless you had specifically given permission for this at the time it was going to be taken. In most cases, it is just the leftover blood or tissue that you might agree to donate to medical research.

10. Thinking about leftover blood or tissue being used for medical research, do you think a person needs to be asked for their consent? FOR EACH RESPONSE: Why/why not? How important is this to you?

11. What would you expect to happen to samples that are left over from clinical procedures?

12. The majority of the time, tissue that is left over is destroyed. How do you feel about that?

There are a number of different ways that a person could give their permission or consent for their sample to be used for medical research. I'd like us to think about some of these now and discuss what we like and what we dislike about these different types of consent.

For peer review only - <http://bmjopen.bmj.com/site/about/guidelines.xhtml>



I'd like us to start by thinking about whether we prefer what is known as an **opt-in** system, or whether we prefer an **opt-out** system of sample donation.

Opt-in means that a person has to say that, after they turn 18, they are willing to and actively agree to donate their sample for research. This is how the current system for organ donation works in the UK.

The other approach is an opt-out approach. In this system, it is assumed that a person is happy, after they turn 18, for their sample to be used for research unless they specifically say otherwise. However, there is a mechanism in place for a person who is not willing to donate to opt out.

So, to start with, let's think about the first option, OPT-IN.

13. What do you think are the pros and cons about this approach? Why?

14. Thinking now about the OPT-OUT approach, what do you think are the pros and cons? Why?

15. Which do you prefer? How important is this to you? (AFTER GROUP DISCUSSION: ask participants to complete associated question on questionnaire)

The current system is an opt-in one, so I want us to think about this type of consent now. If you were going to be asked to donate any leftover blood or tissue for medical research there are two ways this could be done. You could be asked to give consent **every time** you have an operation or blood test, or you could give consent just **once for life for all your samples**, with the option of withdrawing at a later point if you wanted to.

16. Thinking about **consent every time**, what do you think are the advantages and disadvantages of this approach?

17. Thinking about **consent once for life**, what do you think are the advantages and disadvantages of this approach?

18. Can you think of any happy medium which might be better?

19. Which would you prefer? Why? How important is this to you? (AFTER GROUP DISCUSSION: ask participants to complete associated question on questionnaire)

20. If people gave consent just once, when and where do you think the best place would be to give consent?

21. If someone wanted to consent to donate their tissue or organs for medical research in the event of their death, do you think it should be obtained at the same time as consent for organ transplantation and recorded on the organ donor register?

In front of you, you have 3 different scenarios. In each one the story is essentially the same, however there are some slight differences and these are highlighted in bold. I'd like to discuss what you think of each of these in turn.

*Read all 3 scenarios out loud highlighting the key differences between the three. Then go back and discuss each one in turn.*



Scenario 1: Lisa is having surgery to remove a lump from her breast which the doctor is concerned may be cancerous. Before the surgery the surgeon explains that once the tissue is removed, they will take it to the laboratory to do tests on it to check what it is. The surgeon then explains that after these tests are done, there may be some tissue left over. He asks Lisa if she would like to donate this left over tissue for medical research. If it is not donated for medical research it will be destroyed. The surgeon doesn't know exactly what kinds of research the tissue might be used for, but it may be used to find better ways to diagnose, prevent and treat cancer. He also explains that before any research is done, it has to be approved by an independent ethics committee.

So, in this scenario:

- Lisa is asked to give consent once to donate the left over tissue for a range of future unknown uses
- Lisa is given some general information about the kind of research the tissue might be used for but nothing specific.
- This type of consent is known as GENERIC CONSENT

22. What do you think about this type of consent?

23. What do you **like** about this approach?

24. Do you have **any concerns** about this approach?

**Scenario 2:** Lisa is having surgery to remove a lump from her breast which the doctor is concerned may be cancerous. Before the surgery the surgeon explains that once the tissue is removed, they will take it to the laboratory to do tests on it to check what it is. The surgeon then explains that after these tests are done, there may be some tissue left over. He asks Lisa if she would like to donate this left over tissue for medical research. If it is not donated for medical research it will be destroyed. The surgeon doesn't know exactly what types of research the tissue might be used for, but it may be used to find better ways to diagnose, prevent and treat cancer. Lisa is asked to sign a consent form. The surgeon explains that **Lisa can indicate on the consent form whether there are any particular kinds of research which she doesn't want the tissue to be used for, for example research involving animals or research conducted outside the UK.** He also explains that before any research is done, it has to be approved by an independent ethics committee.

So, in this scenario:

- Lisa is asked to give consent once to donate the tissue for a range of future unknown uses;
- Lisa is given some general information about the kind of research the tissue might be used for;
- **Lisa can say if there are any particular kinds of research which she doesn't want the tissue to be used for.**
- This type of consent is known as TIERED CONSENT

25. What do you think about this type of consent?

26. What do you **like** about this approach?

27. Do you have any **concerns** about this approach?

Scenario 3: Lisa is having surgery to remove a lump from her breast which the doctor is concerned may be cancerous. Before the surgery the surgeon explains that once the tissue is removed, they will take it to the laboratory to do tests on it to check what it is. The surgeon then explains that after these tests are done, there may be some tissue left over. He asks Lisa if she would like to donate this left over tissue for medical research. If it is not

1  
2 donated for medical research it will be destroyed. The surgeon explains that **the hospital**  
3 **are currently involved in a study looking at the growth of tumours. He informs her**  
4 **that if she gives permission for the left over tissue to be used, it would only be for**  
5 **this particular study.** He also explains that the study has been approved by an  
6 independent ethics committee.  
7

8 So, in this scenario:

- 9
- 10 • **Lisa is only asked to give consent to a particular study and is given**  
11 **information about that study.**
  - 12 • This type of consent is known as SPECIFIC CONSENT

13 28. What do you think about this type of consent?

14 29. What do you **like** about this approach?

15 30. Do you have any **concerns** about this approach?

16  
17  
18  
19  
20  
21 31. In this exercise we have discussed three different types of consent. Which do you  
22 prefer and why? GO ROUND AND ASK PEOPLE (AFTER GROUP DISCUSSION: ask  
23 participants to complete associated question 6 & 7 on questionnaire)

24  
25 32. Generic consent is the most practical type of consent as it is the least costly to put in  
26 place. Researchers try their very best to honour donors' wishes, but in some cases  
27 where they cannot do this with confidence, instead of risking using a sample for  
28 something the donor feels strongly against, it won't be used at all. If your first choice  
29 wasn't generic consent, does this information change your preference? (AFTER  
30 GROUP DISCUSSION: ask participants to complete question 8.

31  
32 33. So, we've discussed which type of consent you would like for left over samples.  
33 Would your preference be any different for samples that you might donate  
34 specifically for research, e.g. if you volunteered to take part in a study and had to  
35 give a saliva or blood sample?

36  
37 34. Would your preference be any different if you were donating what you might  
38 consider to be more sensitive samples e.g. genetic data, stem cells?

39  
40 35. If you decide to withdraw consent would you be happy for researchers to use the  
41 data that had already been generated up to that point using your sample?

42  
43 36. Do you think a central website where you can find out about general research that  
44 your sample might be used for would be useful and something you would use?  
45  
46  
47

### 48 **Information (10 minutes)**

49  
50 Researchers often need to have access to the donor's medical records in order to be able to  
51 meaningfully interpret the results of the scientific research. However, information, such as  
52 names or addresses are always removed and not included with the sample. This is so that  
53 the person who donated the sample cannot be identified by the scientist conducting the  
54 research or anyone analysing the results of the research. However, the sample may have a  
55 code so that someone not involved in the research can identify the individual if necessary.  
56

57 37. Would you be happy with your medical records being linked to your sample or would  
58 you have concerns? Why?  
59  
60

1  
2 38. Are there any types of information you would not want to be associated with your  
3 sample?  
4

5 Sometimes it can also be helpful for the researcher to have certain information about the  
6 lifestyle of the person who donated the sample, for example whether they smoked, drank  
7 alcohol, how often they exercised etc. This information might help them to better  
8 understand the particular condition they are investigating.  
9

10 39. Would you be happy for this information to be made available or would you have  
11 concerns about your lifestyle information being associated with your sample? Why?  
12  
13

#### 14 **Ownership of sample (5 minutes)**

15  
16 40. What significance do you attach to a biological sample once it has been removed  
17 from your body? Do you still see it as yours or part of you in some way? Are you  
18 owed money if a drug is developed using your sample?  
19  
20  
21  
22  
23  
24  
25  
26  
27  
28  
29  
30  
31  
32  
33  
34  
35  
36  
37  
38  
39  
40  
41  
42  
43  
44  
45  
46  
47  
48  
49  
50  
51  
52  
53  
54  
55  
56  
57  
58  
59  
60

## Appendix V

Survey looking at the publics' views on donating biological samples for medical research

*This survey was originally conducted online in September 2012 and hosted by the market research company Research Now.*

Q1. What age are you?

1. 18-24
2. 25-34
3. 35-44
4. 45-54
5. 55-64
6. 65+

Q2. Are you male or female?

1. Male
2. Female

Q3. What is the occupation of person who receives the highest income in your household?

1. Higher managerial/ professional/ administrative (e.g. established doctor, solicitor, board director in a large organisation (200+ employees, top level civil servant/public service employee)) **(A – Letters will be hidden)**
2. Intermediate managerial/ professional/ administrative (e.g. newly qualified (under 3 years) doctor, solicitor, board director small organisation, middle manager in large organisation, principle officer in civil service/local government) **(B)**
3. Supervisory or clerical level/ junior managerial/ professional/ administrative (e.g. office worker, student doctor, foreman with 25+ employees, salesperson, etc) **(C1)**
4. Student **(C1)**
5. Skilled manual worker (e.g. skilled bricklayer, carpenter, plumber, painter, bus/ ambulance driver, HGV driver, AA patrolman, pub/bar worker, etc) **(C2)**
6. Semi or unskilled manual work (e.g. manual workers, all apprentices to be skilled trades, caretaker, park keeper, non-HGV driver, shop assistant) **(D)**
7. Casual worker – not in permanent employment **(E)**
8. Housewife/househusband/ homemaker **(E)**
9. Retired and living on state pension **(E)**
10. Unemployed or not working due to long-term sickness **(E)**
11. Full-time carer of other household member **(E)**
98. Other (specify)

Q4. What region do you live in?

1. Channel Islands
2. East of England
3. East Midlands
4. London
5. North East
6. North West
7. Northern Ireland
8. Scotland
9. South East
10. South West
11. Wales
12. West Midlands
13. Yorkshire / Humberside
96. Not on Map

Q5. Please choose one option that best describes your ethnic group or background.

1. White or White British
2. Mixed race
3. Asian or Asian British (not Chinese)
4. Black or Black British
5. Chinese
6. Other ethnic group
96. Prefer not to say

Q6. Which religion do you most identify with?

1. Christianity
2. Islam
3. Hinduism
4. Sikhism
5. Judaism
6. Buddhism
7. Other religion
8. No religion
96. Prefer not to say

Q7. If you do have a religion you identify with, to what extent do you consider yourself religious?

1. Not at all religious
2. Moderately religious
3. Very religious
96. Prefer not to say

1  
2  
3  
4 Q8. Please indicate which, if any, is the highest educational or professional qualification you  
5 have obtained.  
6

- 7
- 8 1. No formal qualification
- 9 2. GCSE, O level, Scottish Standard Grade or equivalent
- 10 3. GCE, A-level, Scottish Higher or similar
- 11 4. Vocational (BTEC/NVQ/Diploma)
- 12 5. Degree level or above
- 13 96. Prefer not to say

14  
15  
16  
17 Q9. How would you describe your own level of knowledge about the medical research process  
18 including the use of human tissue samples?  
19

- 20 1. No knowledge
- 21 2. Some knowledge
- 22 3. Good knowledge

23  
24  
25 Q10. Are you or have you ever been affected by a long-standing illness, disability or infirmity  
26 which has required continuous or frequent medical attention (e.g. cancer, diabetes, heart disease,  
27 asthma, a genetic condition)?  
28

- 29
- 30 1. Yes
- 31 2. No

32  
33  
34 Q11. Has a close family member ever been affected by a long-standing illness, disability or  
35 infirmity which has required continuous or frequent medical attention (e.g. cancer, diabetes, heart  
36 disease, asthma, a genetic condition)?  
37

- 38
- 39 1. Yes
- 40 2. No

41  
42  
43 Q12. Have you ever had blood or tissue removed during a medical or surgical procedure?  
44

- 45 1. Yes
- 46 2. No
- 47 97. Don't know

48  
49  
50 Q13. Have you ever been asked to donate any blood or tissue for medical research?  
51

- 52
- 53 1. Yes
- 54 2. No
- 55 97. Don't know

56  
57  
58 **ASK IF CODED 1 AT Q13.**  
59  
60

1  
2  
3 Q14. Did you agree to donate?  
4

- 5 1. Yes  
6 2. No  
7  
8 97. Don't know  
9

10 **ASK IF CODED 2 AT Q14.**

11 Q14a. Please tell us a little bit about your reasons for choosing not to donate.

12 *There are no right or wrong answers – we're just interested in your honest opinion.*  
13

14  
15 This survey is being done to help us understand public opinion about human tissue samples donated  
16 by people for medical research.  
17

18  
19 Medical research is essential to improve our understanding of what keeps us healthy and how  
20 diseases start and progress. It also means scientists can develop new and improved treatments.  
21 Body fluid such as blood, saliva and urine, and human tissue such as cells, skin, fat or even whole  
22 organs (in the event of someone's death), are often used in scientific and medical research. Usually  
23 these are referred to as samples.  
24

25  
26 Types of research that need samples include:  
27

- 28  
29 • Looking at how the body works to fight disease.  
30 • Looking at why some people are more likely to develop certain diseases.  
31 • Developing tests to diagnose conditions like cancer or dementia earlier on.  
32 • Testing new treatments for conditions such as heart disease and diabetes.  
33 • Researching how certain types of cells could be used to treat conditions like Parkinson's  
34 disease and Alzheimer's disease.  
35  
36

37  
38 Many of the tests and treatments used today resulted from people donating samples for research  
39 previously. The removal of samples from a person is always done with the donor's permission.  
40 Samples that are donated for research are anonymised so that the researcher using the sample does  
41 not know who it came from. The types of research that are allowed to take place are highly  
42 regulated by both UK law and also by independent research ethics committees (usually made up of  
43 doctors, scientist, patients and the general public). These ensure any research allowed to be done is  
44 for the benefit of patients.  
45  
46

47  
48 *The next button will appear shortly. In the meantime take some time to read the information above  
49 as it relates to the remainder of the survey.*  
50

51 Q15. On a scale of 1 to 5 with 1 being Not At All Important and 5 being Extremely Important, how  
52 important do you think it is for people to donate samples for medical research?  
53

54  
55 **SCALE:**

- 56 1. Not at all important  
57 2.  
58  
59  
60

- 3.
- 4.
5. Extremely important
97. Don't know

Q16. Samples can be left over from surgery or a medical procedure, or they can be donated specifically for research. Left over samples that are not required for clinical diagnosis or donated for medical research are often destroyed.

In general, would you like to be asked to donate samples for medical research?

1. Definitely yes
2. Probably yes
3. Probably not
4. Definitely not
97. Don't know

#### RANDOMISE STATEMENTS

Q17. You are having a medical procedure to treat a health issue. Would you donate the following types of samples for medical research if they were left over (after necessary medical tests had been done) following the procedure?

#### SCALE:

1. Definitely yes
2. Probably yes
3. Probably not
4. Definitely not
97. Don't know

#### STATEMENTS:

1. Blood
2. Skin tissue
3. Fat
4. Cancerous tissue
5. Liver tissue
6. Bone or cartilage
7. Spare eggs not fertilised during IVF treatment (IVF is a process by which an egg is fertilised by a sperm outside the body and then transferred back into the body to establish a successful pregnancy) **ASK ONLY FEMALES**
8. Spare embryos (fertilised eggs) not transferred back into the body following IVF (IVF is a process by which an egg is fertilised by a sperm outside the body and then transferred back into the body to establish a successful pregnancy)

#### RANDOMISE STATEMENTS



1  
2  
3 Q18. You've gone to the hospital for an appointment and whilst you are in the waiting room the  
4 receptionist explains they are collecting samples for medical research. Would you agree to donate  
5 the following types of samples specifically for medical research, i.e. not as part of any medical  
6 procedure, put purely for the purposes of research?  
7

8  
9 Would you agree to donate the following types of samples specifically for medical research?  
10 Below are some definitions you might need to know in order to answer the questions.  
11

12  
13 *Local anaesthetic - "A type of painkilling medication that is used to numb areas of the body during*  
14 *surgical procedures. You stay awake when you have a local anaesthetic"*  
15

16  
17 *General anaesthetic - "A medication that causes loss of sensation. It is used to give pain relief during*  
18 *surgery. General anaesthetic makes you completely lose consciousness so that surgery can be carried*  
19 *out without causing any pain or discomfort. Most healthy people don't have any problems when*  
20 *having a general anaesthetic. However, as with most medical procedures, there is a small risk of*  
21 *long-term complications and, rarely, death."*  
22

23  
24 **SCALE:**

- 25 1. Definitely yes  
26 2. Probably yes  
27 3. Probably not  
28 4. Definitely not  
29 97. Don't know  
30  
31

32  
33  
34 **STATEMENTS:**

- 35 1. Saliva  
36 2. Urine  
37 3. Blood  
38 4. Tissue collected requiring a local anaesthetic (e.g. a skin cell scraping)  
39 5. Tissue collected requiring a general anaesthetic (e.g. a liver sample)  
40 6. Sperm **ASK ONLY MALES**  
41  
42  
43  
44

45 Q19. In the event of your death, would you be willing to donate the following for medical  
46 research?  
47

48 **SCALE:**

- 49 1. Definitely yes  
50 2. Probably yes  
51 3. Probably not  
52 4. Definitely not  
53 97. Don't know  
54  
55

56  
57 **STATEMENTS:**  
58  
59  
60

1. A small sample of the liver
2. A small sample of the brain
3. A whole liver
4. A whole brain

Q20. You are having surgery for a health issue which requires a general anaesthetic. The surgeon asks you whether you would be willing to consent to any additional tissue (i.e. tissue not needing to be removed as part of the health issue) being taken during the surgery for medical research. He assures you that any additional tissue taken would have no impact for you or your health and that no extra tissue would be removed without your consent.

A decision to consent or not to consent would be equally respected and would have no impact on the care you receive.

Would you be willing to donate the following types of samples for medical research?

*General anaesthetic - "A medication that causes loss of sensation. It is used to give pain relief during surgery. General anaesthetic makes you completely lose consciousness so that surgery can be carried out without causing any pain or discomfort. Most healthy people don't have any problems when having a general anaesthetic. However, as with most medical procedures, there is a small risk of long-term complications and, rarely, death."*

**SCALE:**

1. Definitely yes
2. Probably yes
3. Probably not
4. Definitely not
97. Don't know

**STATEMENTS:**

1. Samples taken from the same part of the body being operated on
2. Samples taken from an area close by
3. Samples involving an additional procedure e.g. taking bone marrow or a tissue sample whilst under the same general anaesthetic

**RANDOMISE STATEMENTS**

Q21. Samples may be used for lots of different types of research. The types of research that are allowed to take place are highly regulated by both UK law and also by research ethics committees. Would you be willing to donate samples for the following types of research?

*Research ethics committee - "A committee usually made up of doctors, scientist, patients and the general public. These ensure any research allowed to be done is for the benefit of patients."*

**SCALE:**

1. Definitely yes
2. Probably yes
3. Probably not
4. Definitely not
97. Don't know

**STATEMENTS:**

1. Understanding how our body fights disease
2. Understanding how our genetic makeup influences whether or not we will be affected by certain conditions
3. Testing new treatments
4. Research which involves using cells that come from embryos (*fertilised eggs*)
5. Research involving animals
6. Research conducted outside of the UK

**RANDOMISE ORDER OF STATEMENTS.**

Q22. There are many places where research is performed, such as universities, the NHS, medical research charities such as Cancer Research UK and Arthritis Research UK, pharmaceutical companies and diagnostic companies. These organisations work individually, and often in collaboration, to carry out research, to understand disease, develop tests for diseases and develop and test new treatments.

Would you be willing to donate samples to the following organisations to carry out approved medical research?

*Diagnostic companies - "A company which develops and manufactures medical tests to diagnose diseases"*

**SCALE:**

1. Definitely yes
2. Probably yes
3. Probably not
4. Definitely not
97. Don't know

**STATEMENTS**

1. NHS hospitals
2. Universities
3. Medical research charities
4. Pharmaceutical companies
5. Diagnostic companies

1  
2  
3  
4 Q23. Samples left over following surgery and once any necessary tests have been done, can be  
5 anonymised and used for medical research. On a scale of 1 to 5 with 1 being Not At All Important  
6 and 5 being Extremely Important, how important do you think it is that you are first asked for your  
7 permission (often known as 'consent') for any left over samples to be used for medical research?  
8 *Anonymised - i.e. identifying features such as names and addresses are removed*  
9  
10

11 **SCALE:**

- 12  
13 1. Not at all important  
14 2.  
15 3.  
16 4.  
17 5. Extremely important  
18  
19  
20

21 Q24. There are a number of different ways that a person could give consent for their left over  
22 samples to be used for medical research.  
23  
24

- 25 a) One way is an 'opt-in' system. Opt-in means that a person must specifically be asked for  
26 their permission before any leftover samples can be used in medical research.  
27  
28 b) The other way is an 'opt-out' system. In this system, it is assumed that a person is happy,  
29 after they turn 18 years old, for any leftover samples to be used for medical research unless they  
30 specifically say otherwise.  
31  
32

33 Which of the two systems to donating leftover samples do you prefer?  
34  
35

- 36 1. Opt-in  
37 2. Opt-out  
38 3. No preference  
39 97. Don't know  
40  
41  
42  
43

44 Q25. The current system in the UK is an opt-in system. That means you have to say whether you  
45 want any leftover samples to be donated for medical research. If you were going to be asked to  
46 donate any leftover samples for medical research there are three ways this could be done.  
47  
48

- 49 a) You could be asked to give consent for left over samples to be used for research **every time**  
50 you have samples removed, or  
51  
52 b) you could be asked just **once for life** for any future left over samples to be used for medical  
53 research (with the option of withdrawing your permission at any later point if you wanted to),  
54  
55 c) you could be **asked at certain points** during your life, for example every 10 years by your GP,  
56 or at the start of treatment for a particular condition or health issue.  
57  
58  
59  
60

1  
2  
3 Which of these three approaches do you prefer?  
4  
5

- 6 1. Consent every time
- 7 2. Consent once for life
- 8 3. Consent at certain points
- 9 4. No preference
- 10 97. Don't know
- 11
- 12
- 13

14 Q26. If you were going to be asked to donate left over samples for medical research every time  
15 you had a medical procedure, would you rather this was discussed with you by a health  
16 professional before the medical procedure or afterwards?  
17

- 18 1. Before
- 19 2. After
- 20 3. No preference
- 21 97. Don't know
- 22
- 23
- 24
- 25
- 26

27 Q27. If we adopted a consent once for life system in the UK for adults (i.e. aged 18 years and  
28 over), when would you prefer to be asked about consenting left over samples for medical  
29 research? *Choose up to 3 options.*  
30

- 31 1. When registering at a GP surgery
- 32 2. During a routine GP appointment
- 33 3. When applying for a driving license
- 34 4. When applying for a passport
- 35 5. The first time I visit the hospital
- 36 6. The first time I have a medical procedure (e.g. blood test or surgery)
- 37 98. Other (please specify)
- 38
- 39
- 40
- 41
- 42

43 Q28. What would be your preferred way to register your consent to donate left over samples for  
44 medical research?  
45

- 46 1. Face to face with a health professional
- 47 2. Letter
- 48 3. Email
- 49 4. Telephone
- 50 5. Via a website
- 51 6. Completing a form (from a GP surgery, post office, library or other community centre) and  
52 returning it by post
- 53 98. Other (please specify)
- 54 97. Don't know
- 55
- 56
- 57
- 58
- 59
- 60

1  
2  
3  
4 Q29. If you later decided you didn't want your samples to be used for medical research, what  
5 would be your preferred way to withdraw that consent?  
6  
7

- 8 1. Face to face with a health professional
- 9 2. Letter
- 10 3. Email
- 11 4. Telephone
- 12 5. Via a website
- 13 6. Completing a form (from a GP surgery, post office, library or other community centre) and  
14 returning it by post
- 15 98. Other (please specify)
- 16 97. Don't know
- 17
- 18
- 19
- 20

21  
22 Q30. Imagine you have agreed to donate a sample for medical research. There are a number of  
23 ways you can give consent for that particular sample to be used:  
24

#### 25 STATEMENTS

- 26
- 27
- 28 1. You can give consent once for your sample to be used in any future research that has been  
29 approved by a research ethics committee. This type of consent is called Generic Consent.
- 30

31 Thinking about Generic Consent, if this was the type of consent you were asked to give, how  
32 likely would you be to donate samples for medical research?  
33

34  
35 *Research ethics committee. "A committee usually made up of doctors, scientist, patients and  
36 the general public. These ensure any research allowed to be done is for the benefit of  
37 patients."*  
38

- 39
- 40
- 41
- 42 2. You can give consent once for your sample to be used in any future research that has been  
43 approved by a research ethics committee but with the option of saying whether there are  
44 certain types of research you don't want your sample to be used for. This type of consent is  
45 called Tiered Consent.  
46

47 Thinking about Tiered Consent, if this was the type of consent you were asked to give, how  
48 likely would you be to donate samples for medical research?  
49

50  
51  
52 *Research ethics committee. "A committee usually made up of doctors, scientist, patients and  
53 the general public. These ensure any research allowed to be done is for the benefit of  
54 patients."*  
55

- 1  
2  
3 3. You can give consent once for the sample to be used for a specific study that you have been  
4 told about, which has been approved by a research ethics committee. The sample will not be  
5 used for any other research other than the particular study you have given consent for. Any  
6 leftover tissue at the end of the study may be destroyed. This type of consent is called  
7 Specific Consent – once only.  
8

9  
10 Thinking about Specific Consent – once only, if this was the type of consent you were asked  
11 to give, how likely would you be to donate samples for medical research?  
12

13  
14 *Research ethics committee. "A committee usually made up of doctors, scientist, patients and*  
15 *the general public. These ensure any research allowed to be done is for the benefit of*  
16 *patients."*  
17

- 18  
19  
20 4. **Lastly**, you can give consent every time for the sample to be used for a specific study that  
21 you have been told about, which has been approved by a research ethics committee. With  
22 this type of consent you would then be contacted and asked for your consent for every new  
23 study in which your sample might be used. This type of consent is called Consent for every  
24 new study.  
25

26  
27 Thinking about Consent for every new study if this was the type of consent you were asked  
28 to give, how likely would you be to donate samples for medical research?  
29

30  
31 *Research ethics committee. "A committee usually made up of doctors, scientist, patients and*  
32 *the general public. These ensure any research allowed to be done is for the benefit of*  
33 *patients."*  
34

35 **SCALE:**

- 36 1. Definitely yes  
37 2. Probably yes  
38 3. Probably not  
39 4. Definitely not  
40  
41 97. Don't know  
42

43  
44  
45 Q31. Which of these four types of consent do you prefer? Please rank them in order of preference.  
46 Put 1 for your first preference; 2 for your second; 3 for your third preference and 4 for your last  
47 preference. If you don't have any preference, and like all 4 equally, tick the 'No preference' you  
48 don't know then tick ' Don't know'  
49

- 50  
51 1. Generic consent  
52 2. Tiered consent  
53 3. Specific consent – once only  
54 4. Consent for every new study  
55 5. No preference  
56  
57 97. Don't know  
58  
59  
60

**ASK TO THOSE PEOPLE WHO DID NOT RANK GENERIC CONSENT AS FIRST CHOICE**

Q32. Generic consent is the most practical type of consent as it is the least costly to put in place. Researchers try their very best to honour donors' wishes, but in some cases where it is too costly to put Tiered or Specific Consent in place, instead of risking using a sample for something the donor feels strongly against, it won't be used at all. If Tiered or Specific consent was not available, what would you do?

1. I would agree to give generic consent
2. I would rather my sample was not used at all
97. Don't know

Q33. Some people feel there are certain types of samples that are more sensitive to donate, for example sperm or left over eggs. If there was a sample that you considered to be sensitive, but were still willing to donate for medical research, which of the four types of consent would you prefer to give?

1. Generic consent
2. Tiered consent
3. Specific consent – once only
4. Consent for every new study
5. No preference
97. Don't know

Q34. Researchers often need to have access to the donor's medical records to be able to interpret the results of their scientific research. However, information such as names or addresses are always removed and are not included with the sample. This is so that the person who donated the sample cannot be identified by the scientist conducting the research or anyone analysing the results of the research. However, the sample may have a code so that someone not involved in the research can identify the individual if necessary, for example, if there was a serious health issue the donor should be aware of.

Would you be willing to have your anonymised medical records linked to your sample?

1. Definitely yes
2. Probably yes
3. Probably not
4. Definitely not
97. Don't know

Q35. Sometimes it can also be helpful for the researcher to have certain information about the lifestyle of the person who donated the sample, for example whether they smoke, drink alcohol, how often they exercise etc. This information might help them to better understand the particular



1  
2  
3 condition they are investigating. Would you be willing to have your anonymised lifestyle  
4 information linked to your sample?  
5

- 6  
7 1. Definitely yes  
8 2. Probably yes  
9 3. Probably not  
10 4. Definitely not  
11 97. Don't know  
12

13  
14  
15 Q36. For some people, it would be interesting to find out what type of medical research is going  
16 on. How would you like to get information on medical research including research on a particular  
17 condition that might use your sample?  
18

- 19  
20 1. Website  
21 2. Newsletter  
22 3. Email  
23 4. Letter  
24 5. Would not be interested in additional information  
25  
26

27  
28 Q37. If you were considering donating whole organs for medical research in the event of your  
29 death, are there any particular organs you would **not** feel comfortable donating?  
30 Please choose all that apply.  
31

- 32  
33 1. Brain  
34 2. Eyes  
35 3. Heart  
36 4. Kidneys  
37 5. Liver  
38 6. Lungs  
39 7. I would not donate any of my organs for medical research  
40 8. None of the above apply as I would be happy to donate either all my organs or whole body  
41 for research  
42  
43 98. Other organs I would not donate (please state)  
44  
45  
46  
47

48  
49 Q38. Sometimes, organs donated for transplant can't be transplanted because for some reason  
50 they are not suitable. However, these organs can still be very useful to researchers. Would you be  
51 willing to donate organs you had intended for transplant for medical research instead if the organ  
52 was not suitable?  
53

- 54  
55 1. Yes, I would donate an organ for research if it was not suitable for transplant  
56 2. No, if they can't be used for transplant I would prefer they were not used at all  
57 3. I would not agree to donate an organ for transplant  
58  
59  
60

1  
2  
3 97. Don't know  
4

5 Q39. If someone wanted to donate their tissue or organs for medical research in the event of  
6 their death, how do you think they should be able to provide their consent to do this?  
7

- 8  
9 1. It should be obtained at the same time as consent for organ transplantation and recorded on  
10 the organ donor register  
11 2. It should be discussed at a GP appointment and recorded in the patients' notes  
12 3. It should be discussed at a hospital and recorded in the patients' notes  
13 98. Other (please specify)  
14 97. Don't know  
15  
16  
17

18  
19 Q40. Someone has indicated in writing that they are willing to donate tissue or organs for medical  
20 research in the event of their death. After the donor's death the relatives decide they disagree with  
21 the donor's wishes. Do you think the relatives should be allowed to override the donor's wishes?  
22

- 23  
24 1. Yes  
25 2. No  
26 97. Don't know  
27  
28  
29

30 Q41. If you have any particular views you would like to share with us about the topics raised in this  
31 questionnaire please feel free to write them here:  
32  
33  
34  
35  
36  
37  
38  
39  
40  
41  
42  
43  
44  
45  
46  
47  
48  
49  
50  
51  
52  
53  
54  
55  
56  
57  
58  
59  
60

## Appendix VI

## Results of survey –unweighted and weighted

| Demographic Data              |            |     |          |     |
|-------------------------------|------------|-----|----------|-----|
|                               | Unweighted |     | Weighted |     |
|                               | N          | %   | N        | %   |
| <b>Sex</b>                    |            |     |          |     |
| Male                          | 504        | 45% | 544      | 49% |
| Female                        | 606        | 55% | 566      | 51% |
| <b>Socioeconomic Group</b>    |            |     |          |     |
| A                             | 41         | 4%  | 44       | 4%  |
| B                             | 215        | 19% | 244      | 22% |
| C1                            | 311        | 28% | 322      | 29% |
| C2                            | 233        | 21% | 233      | 21% |
| D                             | 145        | 13% | 178      | 16% |
| E                             | 165        | 15% | 89       | 8%  |
| <b>Age</b>                    |            |     |          |     |
| 18–24                         | 135        | 12% | 133      | 12% |
| 25–34                         | 184        | 17% | 189      | 17% |
| 35–44                         | 198        | 18% | 200      | 18% |
| 45–54                         | 184        | 17% | 189      | 17% |
| 55–64                         | 176        | 16% | 167      | 15% |
| 65+                           | 233        | 21% | 233      | 21% |
| <b>Occupation</b>             |            |     |          |     |
| Higher managerial             | 41         | 4%  | 44       | 4%  |
| Intermediate managerial       | 215        | 19% | 244      | 22% |
| Supervisory or clerical level | 288        | 26% | 299      | 27% |
| Student                       | 23         | 2%  | 23       | 2%  |
| Skilled manual worker         | 233        | 21% | 233      | 21% |
| Semi or unskilled manual work | 145        | 13% | 178      | 16% |
| Casual worker                 | 12         | 1%  | 6        | 1%  |
| Housewife                     | 9          | 1%  | 5        | 0%  |
| Retired                       | 81         | 7%  | 45       | 4%  |
| Unemployed                    | 46         | 4%  | 24       | 2%  |
| Carer                         | 17         | 2%  | 9        | 1%  |
| Other                         | 0          | 0%  | 0        | 0%  |
| <b>Region</b>                 |            |     |          |     |
| Channel Islands               | 0          | 0%  | 0        | 0%  |
| East of England               | 92         | 8%  | 100      | 9%  |
| East Midlands                 | 57         | 5%  | 78       | 7%  |

## Appendix VI

## Results of survey –unweighted and weighted

|                                                           |      |     |      |     |
|-----------------------------------------------------------|------|-----|------|-----|
| London                                                    | 213  | 19% | 144  | 13% |
| North East                                                | 40   | 4%  | 44   | 4%  |
| North West                                                | 121  | 11% | 122  | 11% |
| Northern Ireland                                          | 30   | 3%  | 33   | 3%  |
| Scotland                                                  | 76   | 7%  | 89   | 8%  |
| South East                                                | 165  | 15% | 155  | 14% |
| South West                                                | 81   | 7%  | 89   | 8%  |
| Wales                                                     | 51   | 5%  | 55   | 5%  |
| West Midlands                                             | 94   | 8%  | 100  | 9%  |
| Yorkshire/Humberlands                                     | 90   | 8%  | 100  | 9%  |
| Not on map                                                | 0    | 0%  | 0    | 0%  |
| <b>Ethnicity</b>                                          |      |     |      |     |
| White or White British                                    | 1057 | 95% | 1065 | 96% |
| Mixed race                                                | 7    | 1%  | 8    | 1%  |
| Asian or Asian British (not Chinese)                      | 18   | 2%  | 17   | 1%  |
| Black or Black British                                    | 19   | 2%  | 12   | 1%  |
| Chinese                                                   | 2    | 0%  | 2    | 0%  |
| Other ethnic group                                        | 4    | 0%  | 2    | 0%  |
| Prefer not to say                                         | 3    | 0%  | 2    | 0%  |
| <b>Religion</b>                                           |      |     |      |     |
| Christianity                                              | 677  | 61% | 673  | 61% |
| Islam                                                     | 13   | 1%  | 11   | 1%  |
| Hinduism                                                  | 6    | 1%  | 6    | 1%  |
| Sikhism                                                   | 0    | 0%  | 0    | 0%  |
| Judaism                                                   | 6    | 1%  | 4    | 1%  |
| Buddhism                                                  | 11   | 1%  | 1    | 0%  |
| Other religion                                            | 15   | 1%  | 8    | 0%  |
| No religion                                               | 370  | 33% | 205  | 38% |
| Prefer not to say                                         | 12   | 1%  | 7    | 1%  |
| <b>To what extent do you consider yourself religious?</b> |      |     |      |     |
| Not at all religious                                      | 234  | 32% | 234  | 32% |
| Moderately religious                                      | 422  | 58% | 424  | 59% |
| Very religious                                            | 64   | 9%  | 56   | 8%  |
| Prefer not to say                                         | 8    | 1%  | 7    | 1%  |
| <b>Education</b>                                          |      |     |      |     |
| No formal qualification                                   | 70   | 6%  | 66   | 6%  |
| GCSE, O level, Scottish Standard Grade or equivalent      | 264  | 24% | 252  | 23% |

## Appendix VI

## Results of survey –unweighted and weighted

|                                          |     |     |     |     |
|------------------------------------------|-----|-----|-----|-----|
| GCE, A-level, Scottish Higher or similar | 214 | 19% | 214 | 19% |
| Vocational (BTEC/NVQ/Diploma)            | 230 | 21% | 237 | 21% |
| Degree level or above                    | 317 | 29% | 330 | 30% |
| Prefer not to say                        | 15  | 1%  | 10  | 1%  |

### Q9 How would you describe your own level of knowledge about the medical research process including the use of human tissue samples?

|                | Unweighted |      | Weighted |      |
|----------------|------------|------|----------|------|
|                | N          | %    | N        | %    |
| No knowledge   | 463        | 42%  | 466      | 42 % |
| Some knowledge | 603        | 54 % | 602      | 54 % |
| Good knowledge | 44         | 4 %  | 43       | 4 %  |

### Q10 Are you or have you ever been affected by a long-standing illness, disability or infirmity which has required continuous or frequent medical attention

|     | Unweighted |      | Weighted |     |
|-----|------------|------|----------|-----|
|     | N          | %    | N        | %   |
| Yes | 399        | 36 % | 391      | 35% |
| No  | 711        | 64 % | 719      | 65% |

### Q11 Has a close family member ever been affected by a long-standing illness, disability or infirmity which has required continuous or frequent medical attention

|     | Unweighted |      | Weighted |     |
|-----|------------|------|----------|-----|
|     | N          | %    | N        | %   |
| Yes | 767        | 69 % | 765      | 69% |
| No  | 343        | 31 % | 345      | 31% |

### Q12 Have you ever had blood or tissue removed during a medical or surgical procedure?

|  | Unweighted | Weighted |
|--|------------|----------|
|  |            |          |

## Appendix VI

## Results of survey –unweighted and weighted

|            | N   | %    | N   | %   |
|------------|-----|------|-----|-----|
| Yes        | 446 | 40 % | 444 | 40% |
| No         | 553 | 50 % | 551 | 50% |
| Don't Know | 111 | 10 % | 115 | 10% |

### Q13 Have you ever been asked to donate any blood or tissue for medical research?

|            | Unweighted |      | Weighted |     |
|------------|------------|------|----------|-----|
|            | N          | %    | N        | %   |
| Yes        | 182        | 16 % | 177      | 16% |
| No         | 904        | 81 % | 907      | 82% |
| Don't Know | 24         | 2 %  | 25       | 2%  |

### Q14 Did you agree to donate?

|            | Unweighted |      | Weighted |     |
|------------|------------|------|----------|-----|
|            | N          | %    | N        | %   |
| Yes        | 155        | 85 % | 153      | 86% |
| No         | 23         | 13 % | 21       | 12% |
| Don't Know | 4          | 2 %  | 3        | 2%  |

### Q15 On a scale of 1 to 5 with 1 being Not At All Important and 5 being Extremely Important, how important do you think it is for people to donate samples for medical research?

|                        | Unweighted |      | Weighted |     |
|------------------------|------------|------|----------|-----|
|                        | N          | %    | N        | %   |
| 1 Not at all important | 5          | 0 %  | 4        | 0%  |
| 2                      | 10         | 1 %  | 9        | 1%  |
| 3                      | 78         | 7 %  | 76       | 7%  |
| 4                      | 406        | 37 % | 408      | 37% |
| 5 Extremely important  | 554        | 50 % | 567      | 51% |
| Don't know             | 57         | 5 %  | 46       | 4%  |

## Appendix VI

## Results of survey –unweighted and weighted

### Q16 In general, would you like to be asked to donate samples for medical research?

|                | Unweighted |      | Weighted |     |
|----------------|------------|------|----------|-----|
|                | N          | %    | N        | %   |
| Definitely yes | 317        | 29 % | 327      | 29% |
| Probably yes   | 513        | 46 % | 526      | 47% |
| Probably not   | 157        | 14 % | 145      | 13% |
| Definitely not | 42         | 4 %  | 35       | 3%  |
| Don't know     | 81         | 7 %  | 77       | 7%  |

### Q17 Would you donate the following types of samples for medical research if they were left over following the procedure?

|                                  |   | Unweighted |          |          |         |            | Weighted |          |          |         |            |
|----------------------------------|---|------------|----------|----------|---------|------------|----------|----------|----------|---------|------------|
|                                  |   | Def yes    | Prob yes | Prob not | Def not | Don't know | Def yes  | Prob yes | Prob not | Def not | Don't know |
| Blood                            | N | 587        | 433      | 48       | 23      | 19         | 599      | 425      | 48       | 20      | 8          |
|                                  | % | 53%        | 39%      | 4%       | 2%      | 2%         | 54%      | 38%      | 4%       | 2%      | 2%         |
| Skin Tissue                      | N | 520        | 451      | 72       | 32      | 35         | 533      | 451      | 67       | 28      | 32         |
|                                  | % | 47%        | 41%      | 6%       | 3%      | 3%         | 48%      | 41%      | 6%       | 3%      | 3%         |
| Fat                              | N | 530        | 450      | 60       | 32      | 38         | 541      | 449      | 56       | 26      | 37         |
|                                  | % | 48 %       | 41%      | 5%       | 3%      | 3%         | 49%      | 40%      | 5%       | 2%      | 3%         |
| Cancerous Tissue                 | N | 572        | 425      | 52       | 26      | 35         | 586      | 420      | 49       | 22      | 34         |
|                                  | % | 52 %       | 38%      | 5%       | 2%      | 3%         | 53%      | 38%      | 4%       | 2%      | 3%         |
| Liver Tissue                     | N | 463        | 468      | 100      | 38      | 41         | 474      | 476      | 96       | 34      | 39         |
|                                  | % | 42 %       | 42%      | 9%       | 3%      | 4%         | 43%      | 42%      | 9%       | 3%      | 4%         |
| Bone or Cartilage                | N | 472        | 460      | 90       | 46      | 42         | 482      | 460      | 87       | 41      | 40         |
|                                  | % | 43 %       | 41%      | 8%       | 4%      | 4%         | 43%      | 41%      | 8%       | 4%      | 4%         |
| Spare eggs not fertilised during | N | 133        | 159      | 121      | 104     | 89         | 128      | 149      | 111      | 93      | 86         |
|                                  | % | 22 %       | 26%      | 20%      | 17%     | 15%        | 23%      | 26%      | 20%      | 16%     | 15%        |

## Appendix VI

## Results of survey –unweighted and weighted

|               |   |      |     |     |     |     |     |     |     |     |     |
|---------------|---|------|-----|-----|-----|-----|-----|-----|-----|-----|-----|
| IVF *         |   |      |     |     |     |     |     |     |     |     |     |
| Spare embryos | N | 225  | 245 | 217 | 223 | 200 | 230 | 254 | 210 | 213 | 203 |
|               | % | 20 % | 22% | 20% | 20% | 18% | 21% | 23% | 19% | 19% | 18% |

\*Female Only

### Q18 Would you agree to donate the following samples specifically for medical research?

|                                                  |   | Unweighted |          |          |         |            | Weighted |          |          |         |            |
|--------------------------------------------------|---|------------|----------|----------|---------|------------|----------|----------|----------|---------|------------|
|                                                  |   | Def yes    | Prob yes | Prob not | Def not | Don't know | Def yes  | Prob yes | Prob not | Def not | Don't know |
| Saliva                                           | N | 568        | 423      | 54       | 30      | 35         | 581      | 413      | 55       | 27      | 34         |
|                                                  | % | 51 %       | 38%      | 5%       | 3%      | 3%         | 52%      | 37%      | 5%       | 2%      | 3%         |
| Urine                                            | N | 553        | 432      | 61       | 33      | 31         | 566      | 424      | 60       | 30      | 30         |
|                                                  | % | 50 %       | 39%      | 5%       | 3%      | 3%         | 51%      | 38%      | 5%       | 3%      | 3%         |
| Blood                                            | N | 455        | 448      | 118      | 47      | 42         | 496      | 446      | 107      | 46      | 42         |
|                                                  | % | 41 %       | 40%      | 11%      | 4%      | 4%         | 42%      | 40%      | 10%      | 4%      | 4%         |
| Tissue collected requiring a local anaesthetic   | N | 273        | 463      | 197      | 100     | 77         | 283      | 471      | 190      | 88      | 78         |
|                                                  | % | 25 %       | 42%      | 18%      | 9%      | 7%         | 26%      | 42%      | 17%      | 8%      | 7%         |
| Tissue collected requiring a general anaesthetic | N | 166        | 286      | 310      | 235     | 113        | 172      | 300      | 309      | 214     | 115        |
|                                                  | % | 15 %       | 26%      | 28%      | 21%     | 10%        | 16%      | 27%      | 28%      | 19%     | 10%        |
| Sperm *                                          | N | 120        | 171      | 104      | 66      | 43         | 135      | 188      | 111      | 64      | 46         |
|                                                  | % | 24 %       | 34%      | 21%      | 13%     | 9%         | 25%      | 35%      | 20%      | 12%     | 9%         |

\*Men only



## Appendix VI

## Results of survey –unweighted and weighted

| Q19 In the event of your death, would you be willing to donate the following samples for medical research? |   |            |          |          |         |            |          |          |          |         |            |  |
|------------------------------------------------------------------------------------------------------------|---|------------|----------|----------|---------|------------|----------|----------|----------|---------|------------|--|
|                                                                                                            |   | Unweighted |          |          |         |            | Weighted |          |          |         |            |  |
|                                                                                                            |   | Def yes    | Prob yes | Prob not | Def not | Don't know | Def yes  | Prob yes | Prob not | Def not | Don't know |  |
| A small sample of your liver                                                                               | N | 485        | 390      | 88       | 51      | 96         | 491      | 391      | 84       | 48      | 96         |  |
|                                                                                                            | % | 44 %       | 35%      | 8%       | 5%      | 9%         | 44%      | 35%      | 8%       | 4%      | 9%         |  |
| A small sample of your brain                                                                               | N | 429        | 304      | 166      | 96      | 115        | 438      | 305      | 158      | 94      | 116        |  |
|                                                                                                            | % | 39 %       | 27%      | 15%      | 9%      | 10%        | 39%      | 27%      | 14%      | 8%      | 10%        |  |
| A whole liver                                                                                              | N | 430        | 319      | 158      | 87      | 116        | 438      | 316      | 154      | 84      | 118        |  |
|                                                                                                            | % | 39 %       | 29%      | 14%      | 8%      | 10%        | 39%      | 28%      | 14%      | 8%      | 11%        |  |
| A whole brain                                                                                              | N | 353        | 234      | 221      | 150     | 152        | 360      | 236      | 214      | 145     | 155        |  |
|                                                                                                            | % | 32 %       | 21%      | 20%      | 14%     | 14%        | 32%      | 21%      | 19%      | 13%     | 14%        |  |

| Q20 You are having surgery for a health issue which requires a general anaesthetic. The surgeon asks you whether you would be willing to consent to any additional tissue? |   |            |          |          |         |            |          |          |          |         |            |  |
|----------------------------------------------------------------------------------------------------------------------------------------------------------------------------|---|------------|----------|----------|---------|------------|----------|----------|----------|---------|------------|--|
|                                                                                                                                                                            |   | Unweighted |          |          |         |            | Weighted |          |          |         |            |  |
|                                                                                                                                                                            |   | Def yes    | Prob yes | Prob not | Def not | Don't know | Def yes  | Prob yes | Prob not | Def not | Don't know |  |
| From the same part of the body                                                                                                                                             | N | 328        | 530      | 115      | 51      | 86         | 342      | 523      | 112      | 50      | 83         |  |
|                                                                                                                                                                            | % | 30 %       | 48%      | 10%      | 5%      | 8%         | 31%      | 47%      | 10%      | 5%      | 7%         |  |
| Samples taken from an area close by                                                                                                                                        | N | 219        | 481      | 212      | 89      | 109        | 229      | 490      | 206      | 81      | 104        |  |
|                                                                                                                                                                            | % | 20 %       | 43%      | 19%      | 8%      | 10%        | 21%      | 44%      | 19%      | 7%      | 9%         |  |
| Samples involving an                                                                                                                                                       | N | 154        | 336      | 298      | 204     | 118        | 164      | 348      | 301      | 180     | 118        |  |
|                                                                                                                                                                            | % | 14 %       | 30%      | 27%      | 18%     | 11%        | 15%      | 31%      | 27%      | 16%     | 11%        |  |

## Appendix VI

## Results of survey –unweighted and weighted

|                      |  |  |  |  |  |  |  |  |  |  |  |
|----------------------|--|--|--|--|--|--|--|--|--|--|--|
| additional procedure |  |  |  |  |  |  |  |  |  |  |  |
|----------------------|--|--|--|--|--|--|--|--|--|--|--|

| Q21 You are having surgery for a health issue which requires a general anaesthetic. The surgeon asks you whether you would be willing to consent to any additional tissue? |   |            |          |          |         |            |          |          |          |         |            |  |
|----------------------------------------------------------------------------------------------------------------------------------------------------------------------------|---|------------|----------|----------|---------|------------|----------|----------|----------|---------|------------|--|
|                                                                                                                                                                            |   | Unweighted |          |          |         |            | Weighted |          |          |         |            |  |
|                                                                                                                                                                            |   | Def yes    | Prob yes | Prob not | Def not | Don't know | Def yes  | Prob yes | Prob not | Def not | Don't know |  |
| Understanding how our body fights disease                                                                                                                                  | N | 390        | 558      | 72       | 27      | 63         | 399      | 554      | 71       | 24      | 62         |  |
|                                                                                                                                                                            | % | 35 %       | 50%      | 6%       | 2%      | 6%         | 36%      | 50%      | 6%       | 2%      | 6%         |  |
| Understanding how our genetic makeup...                                                                                                                                    | N | 305        | 558      | 115      | 47      | 85         | 312      | 564      | 107      | 43      | 83         |  |
|                                                                                                                                                                            | % | 27 %       | 50%      | 10%      | 4%      | 8%         | 28%      | 51%      | 10%      | 4%      | 8%         |  |
| Research that is testing new treatments                                                                                                                                    | N | 318        | 511      | 132      | 52      | 97         | 325      | 502      | 133      | 50      | 99         |  |
|                                                                                                                                                                            | % | 29 %       | 46%      | 12%      | 5%      | 9%         | 29%      | 45%      | 12%      | 5%      | 9%         |  |
| Research involving cells from embryos                                                                                                                                      | N | 157        | 304      | 228      | 214     | 207        | 167      | 319      | 225      | 199     | 200        |  |
|                                                                                                                                                                            | % | 14 %       | 27%      | 21%      | 19%     | 19%        | 15%      | 29%      | 20%      | 18%     | 18%        |  |
| Research involving animals                                                                                                                                                 | N | 107        | 270      | 281      | 318     | 134        | 117      | 285      | 271      | 304     | 132        |  |
|                                                                                                                                                                            | % | 10%        | 24%      | 25%      | 29%     | 12%        | 11%      | 26%      | 24%      | 27%     | 12%        |  |
| Research outside the UK                                                                                                                                                    | N | 109        | 273      | 350      | 199     | 179        | 115      | 277      | 349      | 199     | 170        |  |
|                                                                                                                                                                            | % | 10 %       | 25%      | 32%      | 18%     | 16%        | 10%      | 25%      | 31%      | 18%     | 15%        |  |

## Appendix VI

## Results of survey –unweighted and weighted

| Q22 Would you be willing to donate samples to be used by the following organisations? |   |            |          |          |         |            |          |          |          |         |            |
|---------------------------------------------------------------------------------------|---|------------|----------|----------|---------|------------|----------|----------|----------|---------|------------|
|                                                                                       |   | Unweighted |          |          |         |            | Weighted |          |          |         |            |
|                                                                                       |   | Def yes    | Prob yes | Prob not | Def not | Don't know | Def yes  | Prob yes | Prob not | Def not | Don't know |
| NHS Hospitals                                                                         | N | 367        | 570      | 69       | 31      | 73         | 379      | 569      | 65       | 28      | 70         |
|                                                                                       | % | 33 %       | 51%      | 6%       | 3%      | 7%         | 34%      | 51%      | 6%       | 2%      | 6%         |
| Universities                                                                          | N | 243        | 515      | 185      | 56      | 111        | 255      | 519      | 173      | 54      | 108        |
|                                                                                       | % | 22 %       | 46%      | 17%      | 5%      | 10%        | 23%      | 47%      | 16%      | 5%      | 10%        |
| Medical Research Charities                                                            | N | 307        | 563      | 107      | 41      | 92         | 311      | 561      | 108      | 39      | 91         |
|                                                                                       | % | 28 %       | 51%      | 10%      | 4%      | 8%         | 28%      | 51%      | 10%      | 4%      | 8%         |
| Pharmaceutical Companies                                                              | N | 138        | 487      | 233      | 93      | 159        | 139      | 490      | 227      | 95      | 161        |
|                                                                                       | % | 12 %       | 44%      | 21%      | 8%      | 14%        | 12%      | 44%      | 20%      | 9%      | 14%        |
| Diagnostic Companies                                                                  | N | 187        | 515      | 180      | 74      | 154        | 182      | 511      | 183      | 74      | 159        |
|                                                                                       | % | 17 %       | 46%      | 16%      | 7%      | 14%        | 16%      | 46%      | 17%      | 7%      | 14%        |

**Q23 How important do you think it is that you are first asked for your permission (often known as 'consent') for any leftover samples to be used for medical research?**

|                        | Unweighted |      | Weighted |     |
|------------------------|------------|------|----------|-----|
|                        | N          | %    | N        | %   |
| 1 Not at all important | 40         | 4 %  | 42       | 4%  |
| 2                      | 41         | 4 %  | 43       | 4%  |
| 3                      | 104        | 9 %  | 103      | 9%  |
| 4                      | 274        | 25 % | 268      | 24% |
| 5 Extremely important  | 615        | 55 % | 614      | 55% |
| Don't know             | 36         | 3 %  | 40       | 4%  |

## Appendix VI

## Results of survey –unweighted and weighted

**Q24 How important do you think it is that you are first asked for your permission (often known as 'consent') for any leftover samples to be used for medical research?**

|               | Unweighted |      | Weighted |     |
|---------------|------------|------|----------|-----|
|               | N          | %    | N        | %   |
| Opt-in        | 605        | 55 % | 598      | 54% |
| Opt-out       | 308        | 28 % | 321      | 29% |
| No preference | 151        | 14 % | 146      | 13% |
| Don't know    | 46         | 4 %  | 45       | 4%  |

**Q25 Which of these three approaches do you prefer?**

|                           | Unweighted |      | Weighted |     |
|---------------------------|------------|------|----------|-----|
|                           | N          | %    | N        | %   |
| Consent every time        | 472        | 43 % | 480      | 43% |
| Consent once for life     | 231        | 21 % | 237      | 21% |
| Consent at certain points | 301        | 27 % | 298      | 27% |
| No preference             | 82         | 7 %  | 72       | 7%  |
| Don't know                | 24         | 2 %  | 22       | 2%  |

**Q26 If you were going to be asked to donate left over samples for medical research every time you had a medical procedure, would you rather this was discussed with you by a health professional before the medical procedure or afterwards?**

|               | Unweighted |      | Weighted |     |
|---------------|------------|------|----------|-----|
|               | N          | %    | N        | %   |
| Before        | 897        | 81 % | 908      | 82% |
| After         | 48         | 4 %  | 48       | 4%  |
| No preference | 151        | 14 % | 142      | 13% |
| Don't know    | 14         | 1 %  | 12       | 1%  |

## Appendix VI

## Results of survey –unweighted and weighted

**Q27 If a consent once for life system was in place, when would you prefer to be asked about consenting left over samples for medical research?**

|                                              | Unweighted |      | Weighted |     |
|----------------------------------------------|------------|------|----------|-----|
|                                              | N          | %    | N        | %   |
| When registering at a GP surgery             | 425        | 39 % | 419      | 38% |
| During a routine GP appointment              | 386        | 35 % | 380      | 34% |
| When applying for a driving licence          | 83         | 8 %  | 88       | 8%  |
| When applying for a passport                 | 75         | 7 %  | 80       | 7%  |
| The first time I visit the hospital          | 233        | 21 % | 228      | 21% |
| The first time I have a medical consultation | 513        | 47 % | 510      | 46% |

**Q28 If a consent once for life system was in place, when would you prefer to be asked about consenting left over samples for medical research?**

|                                            | Unweighted |      | Weighted |     |
|--------------------------------------------|------------|------|----------|-----|
|                                            | N          | %    | N        | %   |
| Face to face with a health professional    | 720        | 65 % | 727      | 65% |
| Letter                                     | 66         | 6 %  | 64       | 6%  |
| Email                                      | 30         | 3 %  | 32       | 3%  |
| Telephone                                  | 14         | 1 %  | 13       | 1%  |
| Via a website                              | 60         | 5 %  | 61       | 6%  |
| Completing a form and returning it by post | 161        | 15 % | 160      | 14% |
| Other (please specify)                     | 4          | 0 %  | 4        | 0%  |
| Don't know                                 | 55         | 5 %  | 49       | 4%  |

**Q29 If you later decided you didn't want your samples to be used for medical research, what would be your preferred way to withdraw that consent?**

|                                         | Unweighted |      | Weighted |     |
|-----------------------------------------|------------|------|----------|-----|
|                                         | N          | %    | N        | %   |
| Face to face with a health professional | 421        | 38 % | 424      | 38% |
| Letter                                  | 95         | 9 %  | 92       | 8%  |
| Email                                   | 89         | 8 %  | 93       | 8%  |
| Telephone                               | 56         | 5 %  | 51       | 5%  |
| Via a website                           | 137        | 12 % | 144      | 13% |

## Appendix VI

## Results of survey –unweighted and weighted

|                                            |     |      |     |     |
|--------------------------------------------|-----|------|-----|-----|
| Completing a form and returning it by post | 243 | 22 % | 244 | 22% |
| Other (please specify)                     | 8   | 1 %  | 6   | 1%  |
| Don't know                                 | 61  | 5 %  | 55  | 5%  |

### Q30 How likely would you be to donate samples for medical research using the following models of consent?

|                                      |   | Unweighted |          |          |         |            | Weighted |          |          |         |            |
|--------------------------------------|---|------------|----------|----------|---------|------------|----------|----------|----------|---------|------------|
|                                      |   | Def yes    | Prob yes | Prob not | Def not | Don't know | Def yes  | Prob yes | Prob not | Def not | Don't know |
| Generic                              | N | 216        | 528      | 163      | 64      | 139        | 228      | 538      | 154      | 52      | 38         |
|                                      | % | 19 %       | 48%      | 15%      | 6%      | 13%        | 21%      | 48%      | 14%      | 5%      | 12%        |
| Tiered                               | N | 242        | 549      | 125      | 55      | 139        | 244      | 560      | 124      | 49      | 133        |
|                                      | % | 22 %       | 49%      | 11%      | 5%      | 13%        | 22%      | 50%      | 11%      | 4%      | 12%        |
| Specific                             | N | 336        | 553      | 88       | 28      | 105        | 339      | 551      | 89       | 29      | 102        |
|                                      | % | 30 %       | 50%      | 8%       | 3%      | 9%         | 31%      | 50%      | 8%       | 3%      | 9%         |
| Specific consent for every new study | N | 293        | 560      | 110      | 27      | 120        | 300      | 560      | 109      | 26      | 115        |
|                                      | % | 26 %       | 50%      | 10%      | 2%      | 11%        | 27%      | 50%      | 10%      | 2%      | 10%        |

### Q31 Which of these four types of consent do you prefer?

| Preferences     | Generic    |     |          |     |
|-----------------|------------|-----|----------|-----|
|                 | Unweighted |     | Weighted |     |
|                 | N          | %   | N        | %   |
| 1 <sup>st</sup> | 200        | 18% | 207      | 19% |
| 2 <sup>nd</sup> | 159        | 14% | 163      | 15% |
| 3 <sup>rd</sup> | 168        | 15% | 168      | 15% |
| 4 <sup>th</sup> | 344        | 31% | 327      | 30% |
| Tiered          |            |     |          |     |
| 1 <sup>st</sup> | 156        | 14% | 152      | 14% |
| 2 <sup>nd</sup> | 246        | 22% | 252      | 23% |

## Appendix VI

## Results of survey –unweighted and weighted

|                              |     |     |     |     |
|------------------------------|-----|-----|-----|-----|
| 3 <sup>rd</sup>              | 360 | 32% | 355 | 32% |
| 4 <sup>th</sup>              | 105 | 10% | 106 | 10% |
| <b>Specific (once only)</b>  |     |     |     |     |
| 1 <sup>st</sup>              | 198 | 18% | 183 | 17% |
| 2 <sup>nd</sup>              | 306 | 28% | 304 | 27% |
| 3 <sup>rd</sup>              | 202 | 18% | 209 | 19% |
| 4 <sup>th</sup>              | 161 | 15% | 169 | 15% |
| <b>Specific (every time)</b> |     |     |     |     |
| 1 <sup>st</sup>              | 341 | 31% | 323 | 29% |
| 2 <sup>nd</sup>              | 157 | 14% | 146 | 13% |
| 3 <sup>rd</sup>              | 138 | 12% | 133 | 12% |
| 4 <sup>th</sup>              | 258 | 23% | 263 | 24% |
| Don't Know                   | 63  | 6%  | 62  | 6%  |
| No Preference                | 181 | 16% | 183 | 17% |

**Q32 If your preferred system of consent was not available, what would you do?**

|                                              | Unweighted |      | Weighted |     |
|----------------------------------------------|------------|------|----------|-----|
|                                              | N          | %    | N        | %   |
| I would agree to give generic consent        | 348        | 52 % | 350      | 53% |
| I would rather my sample was not used at all | 187        | 28 % | 172      | 26% |
| Don't know                                   | 133        | 20 % | 135      | 21% |

**Q33 If there was a sample that you considered to be sensitive, but were still willing to donate for medical research, which of the four types of consent would you prefer to give?**

|                              | Unweighted |      | Weighted |     |
|------------------------------|------------|------|----------|-----|
|                              | N          | %    | N        | %   |
| Generic Consent              | 131        | 12 % | 135      | 12% |
| Tiered Consent               | 105        | 9 %  | 101      | 9%  |
| Specific Consent - once only | 246        | 22 % | 228      | 21% |
| Consent for every new study  | 278        | 25 % | 288      | 26% |

## Appendix VI

## Results of survey –unweighted and weighted

|               |     |      |     |     |
|---------------|-----|------|-----|-----|
| No Preference | 206 | 19 % | 216 | 19% |
| Don't Know    | 144 | 13 % | 142 | 13% |

### Q34 Would you be willing to have your anonymised medical records linked to your sample?

|                | Unweighted |      | Weighted |     |
|----------------|------------|------|----------|-----|
|                | N          | %    | N        | %   |
| Definitely yes | 266        | 24 % | 279      | 25% |
| Probably yes   | 493        | 44 % | 497      | 45% |
| Probably not   | 165        | 15 % | 157      | 14% |
| Definitely not | 77         | 7 %  | 71       | 6%  |
| Don't know     | 109        | 10 % | 107      | 10% |

### Q35 Would you be willing to have your anonymised lifestyle information linked to your sample?

|                | Unweighted |      | Weighted |     |
|----------------|------------|------|----------|-----|
|                | N          | %    | N        | %   |
| Definitely yes | 377        | 34 % | 398      | 35% |
| Probably yes   | 530        | 48 % | 527      | 47% |
| Probably not   | 90         | 8 %  | 90       | 8%  |
| Definitely not | 48         | 4 %  | 43       | 4%  |
| Don't know     | 65         | 6 %  | 61       | 5%  |

### Q36 How would you like to get information on medical research including research on a particular condition that might use your sample?

|                                                   | Unweighted |      | Weighted |     |
|---------------------------------------------------|------------|------|----------|-----|
|                                                   | N          | %    | N        | %   |
| Website                                           | 295        | 27 % | 304      | 27% |
| Newsletter                                        | 104        | 9 %  | 97       | 9%  |
| Email                                             | 302        | 27 % | 315      | 28% |
| Letter                                            | 241        | 22 % | 228      | 21% |
| Would not be interested in additional information | 168        | 15 % | 166      | 15% |



## Appendix VI

## Results of survey –unweighted and weighted

**Q37 Are there any particular organs you would not feel comfortable donating in the event of your death?**

|         | Unweighted |     | Weighted |     |
|---------|------------|-----|----------|-----|
|         | N          | %   | N        | %   |
| Brain   | 337        | 31% | 329      | 30% |
| Eyes    | 307        | 28% | 308      | 28% |
| Heart   | 128        | 12% | 121      | 11% |
| Kidneys | 60         | 5 % | 59       | 5%  |
| Liver   | 68         | 6 % | 65       | 6%  |
| Lungs   | 67         | 6%  | 63       | 6%  |

**Q38 If you were considering donating whole organs for medical research in the event of your death, are there any particular organs you would not feel comfortable donating?**

|                                                                                   | Unweighted |      | Weighted |     |
|-----------------------------------------------------------------------------------|------------|------|----------|-----|
|                                                                                   | N          | %    | N        | %   |
| Yes, I would donate an organ for research if it was not suitable for transplant   | 755        | 68 % | 766      | 69% |
| No, if they can't be used for transplant I would prefer they were not used at all | 125        | 11 % | 121      | 11% |
| I would not agree to donate an organ for transplant                               | 96         | 9 %  | 95       | 9%  |
| Don't know                                                                        | 134        | 12 % | 128      | 12% |

## Appendix VI

## Results of survey –unweighted and weighted

| Q40 Would you be willing to have your anonymised lifestyle information linked to your sample?                        |            |      |            |      |          |      |
|----------------------------------------------------------------------------------------------------------------------|------------|------|------------|------|----------|------|
|                                                                                                                      | Unweighted |      | Unweighted |      | Weighted |      |
|                                                                                                                      | N          | %    | N          | %    | N        | %    |
| Yes                                                                                                                  | 174        | 16 % | 166        | 52 % | 166      | 15 % |
| No                                                                                                                   | 789        | 77 % | 580        | 80 % | 579      | 72 % |
| Don't know                                                                                                           | 147        | 13 % | 144        |      | 144      | 13 % |
| It should be obtained at the same time as consent for organ transplantation and recorded on the organ donor register |            |      | 270        | 24 % | 267      | 24 % |
| It should be discussed at a GP appointment and recorded in the patients' notes                                       |            |      | 140        | 13 % | 143      | 13 % |
| Other                                                                                                                |            |      | 13         | 1 %  | 14       | 1 %  |
| Don't know                                                                                                           |            |      | 107        | 10 % | 108      | 10 % |

Note: percentages may not add up to 100% due to rounding.



**Consent for the use of human biological samples for  
biomedical research – a mixed methods study exploring the  
UK public's preferences**

|                                    |                                                                                                                                                                                                                                                                                                                                                                                                                                                         |
|------------------------------------|---------------------------------------------------------------------------------------------------------------------------------------------------------------------------------------------------------------------------------------------------------------------------------------------------------------------------------------------------------------------------------------------------------------------------------------------------------|
| Journal:                           | <i>BMJ Open</i>                                                                                                                                                                                                                                                                                                                                                                                                                                         |
| Manuscript ID:                     | bmjopen-2013-003022.R2                                                                                                                                                                                                                                                                                                                                                                                                                                  |
| Article Type:                      | Research                                                                                                                                                                                                                                                                                                                                                                                                                                                |
| Date Submitted by the Author:      | 12-Jun-2013                                                                                                                                                                                                                                                                                                                                                                                                                                             |
| Complete List of Authors:          | Lewis, Celine; Genetic Alliance UK, Unit 4D Leroy House<br>Clotworthy, Margaret; Human Focused Testing,<br>Hilton, Shona; Medical Research Council, CSO Social & Public Health<br>Sciences Unit<br>Magee, Caroline; National Cancer Research Institute, Confederation of<br>Cancer Biobanks<br>Robertson, Mark; AstraZeneca, Science Policy & Relations<br>Stubbins, Lesley; GlaxoSmithKline, Medicines Research Centre<br>Corfield, Jule; Areteva Ltd, |
| <b>Primary Subject<br>Heading</b>: | Public health                                                                                                                                                                                                                                                                                                                                                                                                                                           |
| Secondary Subject Heading:         | Ethics, Genetics and genomics, Health policy                                                                                                                                                                                                                                                                                                                                                                                                            |
| Keywords:                          | GENETICS, Health policy < HEALTH SERVICES ADMINISTRATION &<br>MANAGEMENT, PUBLIC HEALTH, MEDICAL ETHICS                                                                                                                                                                                                                                                                                                                                                 |
|                                    |                                                                                                                                                                                                                                                                                                                                                                                                                                                         |

SCHOLARONE™  
Manuscripts

only

**Consent for the use of human biological samples for biomedical research – a mixed methods study exploring the UK public’s preferences**

Celine Lewis<sup>1</sup>, Margaret Clotworthy<sup>2</sup>, Shona Hilton<sup>3</sup>, Caroline Magee<sup>4</sup>, Mark J Robertson<sup>5</sup>, Lesley J Stubbins<sup>6</sup>, Julie Corfield<sup>7</sup>

<sup>1</sup>Genetic Alliance UK, Unit 4D Leroy House, 436 Essex Road, London, N1 3LY, UK

<sup>2</sup>Human Focused Testing, 50 the Barns, Littleport, Cambridge, CB6 1GG, UK

<sup>3</sup>Medical Research Council/CSO Social & Public Health Sciences Unit, 4 Lilybank Gardens, Glasgow, G12 8RZ, UK

<sup>4</sup>Confederation of Cancer Biobanks, National Cancer Research Institute, Angel Building, 407 St John Street, London EC1V 4AD, UK

<sup>5</sup>AstraZeneca, Science Policy & Relations, 11G43 Mereside, Alderley Park, Macclesfield, Cheshire SK10 4TF, UK

<sup>6</sup>GlaxoSmithKline Medicines Research Centre, Gunnels Wood Road, Stevenage, Hertfordshire, SG1 2NY, UK

<sup>7</sup>Areteva Ltd, BioCity, Nottingham, NG1 1GF, UK

**Running title:** Consent for the use of biosamples - the UK public's preferences

**Correspondence to:**

Dr Celine Lewis

Genetic Alliance UK,

Unit 4D Leroy House,

436 Essex Road,

London,

N1 3QP

**Email:** celine@geneticalliance.org.uk

**Keywords:** consent, biobanking, public views, public preferences, biomedical research

**Word count:** 5306

**ABSTRACT**

**Objective:** A mixed methods study exploring the UK general public's views towards consent for the use of biosamples for biomedical research.

**Setting:** Cross-sectional population-based focus groups followed by an online survey.

**Participants:** Twelve focus groups (81 participants) selectively sampled to reflect a range of demographic groups; 1110 survey responders recruited through a stratified sampling method with quotas set on sex, age, geographical location, socio-economic group and ethnicity.

**Main outcome measures:** 1) Views on the importance of consent when donating residual biosamples for medical research; 2) preferences for opt-in or opt-out consent approaches; 3) preferences for different consent models.

**Results:** Participants believed obtaining consent for use of residual biosamples was important as it was "morally correct" to ask, and enabled people to make an active choice and retain control over their biosamples. Survey responders preferred opt-in consent (55%); the strongest predictor was being from a low socio-economic group (OR 2.22, 95% CI 1.41-3.57,  $p=0.001$ ) and having a religious affiliation (OR 1.36, 95% CI 1.01-1.81,  $p=0.04$ ). Focus group participants had a slight preference for opt-out consent because by using this approach more biosamples would be available and facilitate research. Concerning preferred models of consent for research use of biosamples, survey responders preferred specific consent with re-contact for each study for which their biosamples are eligible. Focus group participants preferred generic consent as it provided "flexibility for researchers" and reduced the likelihood that biosamples would be wasted. The strongest predictor for preferring specific consent was preferring opt-in consent (OR 4.58, 95% CI 3.30-6.35,  $p=0.015$ ) followed by non-'White' ethnicity (OR 2.94, 95% CI 1.23-7.14,  $p<0.001$ ).

**Conclusions:** There is a preference amongst the UK public for ongoing choice and control over donated biosamples, however increased knowledge and opportunity for discussion is associated with acceptance of less restrictive consent models for some people.

## ARTICLE SUMMARY

### Article focus

- To explore views of the UK public on the importance of consent being sought to the use of residual biosamples for medical research;
- The publics' preferences for opt-in or opt-out approaches to consent;
- The publics' preferences for generic, tiered or specific consent.

### Key messages

- Obtaining consent for the use of residual biosamples for biomedical research was perceived as important by members of the general public.
- Survey participants exhibited a desire to retain active choice and control when donating biosamples and over the uses to which their biosamples might be put, preferring an opt-in system and specific consent, however these results differ from those reported during focus group discussions, where preference was for less restrictive consent models (an opt-out system and generic consent) that are likely to increase availability of biosamples.
- These differences might be accounted for by the fact that focus group participants were given more background information about the use of residual biosamples in research and had time to consider the benefits and disadvantages of the different approaches.

### Strengths and limitations of this study

- This study contributes further to our understanding of the UK public's views and preferences towards consent for the use of biosamples in medical research. Our study supports the premise that increased knowledge and opportunity for discussion is associated with acceptance of less restrictive consent models.
- Due to the hypothetical nature of the study, the findings may not necessarily correlate with actual behaviour.

## INTRODUCTION

Human biological samples (biosamples), including organs, tissues, biofluids such as blood, and their derivatives, are increasingly important resources for biomedical research[1,2]. For example, they can help us to understand how we diagnose, categorise and treat a whole variety of medical conditions including cancer[1] and are particularly important when studying rare diseases or conditions where biosamples are hard to obtain. Biosamples are donated by either healthy volunteers or patients, either through specific research studies or as residual tissues or biofluids surplus to diagnostic requirements, or post mortem. Biosamples can be used fresh or can be first stored in a biobank, a collection of biosamples often linked with the donors' clinical and demographic information, as biosample attributes. Here, the quality of the data linked to the biosample is as important as the quality of the biosamples themselves, providing essential context within which to design analyses and interpret results or carry our further experimental studies. Clinical data may also be enriched with lifestyle and environmental information[3].

It is widely accepted that that donor consent should be sought and obtained before biosamples can be used in research[4,5]. Consent in research ethics relates to ensuring respect for the autonomy and dignity of the donors (research participants) and protecting them from abuse[5] and In fact, in England, Wales and Northern Ireland, the Human Tissue Act establishes donor consent as the baseline principle for the retention and use of organs and tissue for purposes beyond diagnosis and treatment, although further statutory consent exemptions do exist in certain circumstances, notably use of anonymised tissue from the living for research ethics committee (REC) approved research projects[6]. The value of biobanks, in supporting broad, long-term research purposes, means that the model of the consent process needs to be considered in order to ensure that it is valid and appropriate. A number of different consent frameworks which address consent scope and process have been proposed as a result[5]. However, there is continued debate as to which is the most appropriate in various situations[4,7,8].

Both the Human Tissue Authority[9] and National Research Ethics Service[10] recommend generic consent (Table 1), a view that has also been endorsed by UK research funders[11] and the Nuffield Council on Bioethics[12]. One commonly cited criticism of generic consent is that it is not sufficiently 'informed' as future research uses are not known at the time of donation[13]. Empirical research examining public and patient preferences has highlighted that there is no clear consensus on the issue, with

specific consent being identified as the most favoured form of consent in some studies[14,15], and generic consent in others[16-18].

Table 1: Approaches to consent of biosamples

| <b>Initial consent methods</b>                |                                                                                                                                                                                                                                                                                                               |
|-----------------------------------------------|---------------------------------------------------------------------------------------------------------------------------------------------------------------------------------------------------------------------------------------------------------------------------------------------------------------|
| Opt-in consent                                | The storage and use of biosamples for research on the basis that the donor has actively agreed to do so.                                                                                                                                                                                                      |
| Opt-out consent                               | The storage and use of samples for research on the basis that the donor has not objected, after previously being given the opportunity to do so.                                                                                                                                                              |
| <b>Opt-in consent methods</b>                 |                                                                                                                                                                                                                                                                                                               |
| Consent once for life                         | Consent is provided once for life for use of any residual samples for research with the option of withdrawing permission at a later stage if the donor wishes to do so.                                                                                                                                       |
| Consent at certain points                     | Consent is provided at certain points for use of residual biosamples for research, e.g. every 10 years or at the beginning of a particular episode of care.                                                                                                                                                   |
| Consent every time                            | Consent is requested every time residual biosamples may become available for use in research.                                                                                                                                                                                                                 |
| <b>Consent for research use of biosamples</b> |                                                                                                                                                                                                                                                                                                               |
| Generic consent                               | Consent to the use of donated samples for a range of unknown uses, on the basis of general information about those possible uses and about the governance arrangements in place. Also referred to as 'broad' or 'blanket' consent.                                                                            |
| Tiered consent                                | A more restricted form of consent for use of samples, where the donor is invited to agree to the use of their samples in unknown projects, but given the option of specifying particular categories of research that they wish to exclude e.g. embryonic research. Also referred to as 'categorical' consent. |
| Specific consent –once only                   | Consent to the use of donated samples for a specified study only, on the basis of information provided about that study. Any residual sample will be discarded at the end of that study.                                                                                                                      |
| Specific consent – for every new study        | Consent to the use of donated samples for a specified study, on the basis of information provided about that study. However, participants are re-contacted and asked to consider participating in every new study for which their biosamples are eligible.                                                    |

Note: Consent terms were selected based on common usage within the UK biobanking system (for example, generic consent is the term used by the Human Tissue Authority, National Research Ethics Service, and National Cancer Research Institute) and definitions chosen in consultation with a team of representatives from universities, hospital biobank staff, pathologists and industry.



1  
2  
3 The 2011 Nuffield Council report on donation of human material for medicine and  
4 research also recommends that research funders should work to increase public  
5 awareness of the key role of donated tissue in scientific and clinical research[12]. Public  
6 trust and confidence in the consent process is of paramount importance to maintain and  
7 increase public support for donation and use of biosamples for biomedical research in the  
8 UK. For this reason, it is important to understand and inform public opinion to ensure  
9 consent models are aligned to public expectations and preferences. Whilst numerous  
10 international studies have been conducted which focus on consent preferences, research  
11 conducted in the UK has tended to focus on large scale population biobanks, such as UK  
12 Biobank[19] or Generation Scotland[20], which require ongoing contact with donors, or  
13 on the views of patients on the donation of residual biosamples[21]. The current study  
14 was conducted to broaden our understanding of the UK public's views on biosample  
15 donation for biomedical research. Moreover, the findings are intended to inform a  
16 biobanking policy for STRATUM (Strategic Tissue Repository Alliance Through Unified  
17 Methods), a Technology Strategy Board<sup>i</sup> and pharmaceutical industry-funded project  
18 seeking to address the problem of insufficient numbers of biosamples and associated  
19 clinical data of adequate quality to fully support biomedical research in the UK.  
20  
21

22  
23  
24  
25  
26  
27  
28  
29 The specific aims of this study were to 1) identify participants' views on the importance  
30 of consent when donating residual biosamples for medical research; 2) explore  
31 preferences for opt-in or opt-out approaches to consent; and 3) explore preferences for  
32 different consent models (Table 1). Public willingness to donate biosamples, views on  
33 donation of different biosample types, and conditions of their use (by which  
34 organisations and for which types of research) are reported elsewhere (Public views on  
35 the donation and use of human biological samples in biomedical research – a mixed  
36 methods study, 2013, unpublished manuscript).  
37  
38  
39

## 40 41 **METHODS**

42  
43 This was a mixed methods study comprising qualitative focus groups and a quantitative  
44 on-line survey. Ethical approval for the study was granted by the University of  
45 Manchester Research Ethics Committee in April 2012.  
46  
47

### 48 49 **Focus groups**

50  
51  
52 Twelve focus groups (including one pilot group) were conducted between May and July  
53 2012 in six different geographic locations across the UK. Participants were recruited  
54 face-to-face in the street by a market research company The Focus Group. Participants  
55  
56

57  
58 <sup>i</sup> under the Stratified Medicines Programme: Business Models Value Systems  
59  
60

1  
2  
3 were purposively sampled; each group chosen to reflect a particular demographic (age,  
4 socio-economic group (SEG), ethnicity) in order to gather a wide spectrum of views and  
5 enable comparisons across groups. Two 'patient' groups were also included, comprising  
6 people who had had an operation in the past two years requiring an overnight hospital  
7 stay, and people who currently have, or have had, either a serious or chronic illness, or  
8 disability. The latter group comprised people diagnosed with diabetes, cancer, heart  
9 disease, asthma and the genetic condition Marfan syndrome. A further group consisted  
10 of generally healthy volunteers who had donated a biosample specifically for research  
11 purposes.  
12  
13  
14  
15

16  
17  
18 Before agreeing to take part, potential participants were given a participant information  
19 sheet telling them about the study (see supplementary data file Appendix I). Those that  
20 were interested were screened through a questionnaire containing demographic  
21 questions to assess their suitability for a particular focus group. These were held in  
22 'neutral' locations such as hotel conference rooms or church halls and facilitated by an  
23 experienced facilitator (CL). Before each group discussion, participants were sent a short  
24 information leaflet about the use of biosamples in biomedical research to provide some  
25 background context for the discussion and to prompt them to think about the key issues  
26 (see supplementary data file Appendix II). This information was written by a core team  
27 of authors drawn from across academia and industry, including patient representation. It  
28 was reviewed by three members of the patient organisation Genetic Alliance UK as well  
29 as the science communication charity Sense about Science to ensure readability and  
30 non-bias. Before focus group discussions began, participants were asked to sign a  
31 consent form. Each participant received £50 for taking part to cover time and travel  
32 costs. Focus groups lasted 90 minutes and digital audio recordings were taken.  
33  
34  
35  
36  
37  
38  
39

40  
41 A detailed discussion guide was developed to explore participant views and preferences  
42 towards consent scope and process (see supplementary data file Appendix III). The main  
43 focus related to the use of biosamples surplus to diagnostic requirements following  
44 surgery or a medical procedure. Questions were informed by other empirical studies of  
45 consent in biobanking[16,22], developed by the authors, and addressed the topics  
46 described above. To enhance understanding around the different consent models,  
47 participants were given a sheet presenting three different scenarios, each of which  
48 elaborated on one of the three consent models chosen for discussion (see supplementary  
49 data file Appendix III,p.4). For each topic, discussion began by asking the group to  
50 consider the benefits and disadvantages of each particular approach. Once no new  
51 themes were emerging, each participant was asked to complete an accompanying  
52 anonymous questionnaire which asked them to select their preferred consent model. The  
53  
54  
55  
56  
57  
58  
59  
60

1  
2  
3 discussion guide, scenario sheet and questionnaire were piloted at the first focus group  
4 which resulted in some minor amendments to wording.  
5

6  
7 Recordings were fully transcribed and transcriptions checked. The software package  
8 Nvivo version 9 (QSR International, Pty Ltd) was used to help organise the data for  
9 analysis. This comprised grouping responses to questions into broad thematic categories  
10 which were then refined through sub-codes. Coding of all 12 transcripts was conducted  
11 by CL. The first six transcripts to be coded were also independently coded by a second  
12 researcher (SR). Codes were then compared to assess consistency of coding and ensure  
13 inter-rater reliability. Any discrepancies were discussed until consensus was reached.  
14 The remainder of the transcripts were then coded according to the agreed coding  
15 framework. **Survey**  
16  
17  
18  
19

20  
21 Once data analysis had been conducted on the focus group transcripts, the findings were  
22 used to inform development of a quantitative survey which was used to canvas public  
23 opinion on the issues of interest across a representative sample of the UK population  
24 (see supplementary data file Appendix IV). The survey was carried out by the market  
25 research company Research Now using their online panel community of UK residents. A  
26 stratified sampling method was used: quotas were set on sex, age, geographical  
27 location, SEG and ethnicity, in line with data provided by the Office of National Statistics  
28 (ONS) to ensure the sample was as representative of the UK population as possible.  
29 Within each category, a random sample was selected from the Research Now database  
30 containing 451,185 active respondents. We aimed to recruit 1,000 responders in total.  
31 The sample size required depends on the number of predictors, the expected effect size  
32 and the level of power. According to Miles and Shevlin [23], if we are expecting a small  
33 effect size, a sample size of 600 is considered adequate to achieve a high level of power  
34 of 0.8 (a benchmark suggested by Cohen [24]) for four predictors. As highlighted in  
35 Table 2 we can formulate at least four hypothesis, for example, people from a higher  
36 socio-economic group are more likely to donate biosamples than those from lower socio-  
37 economic group. With a sample size of 1,000, this study would provide highly reliable  
38 results. In order to reduce any on-line bias in our sample, 100 face-to-face interviews  
39 with non-internet users were conducted. An additional 'boost' sample of 100 people (not  
40 included in the main sample analysis) was also conducted with people from three  
41 minority ethnic groups ('Black', 'Chinese', 'S. Asian') so that we could conduct sub-group  
42 analysis between the groups.  
43  
44  
45  
46  
47  
48  
49  
50  
51  
52

53  
54 The survey questions were developed by the authors and piloted with 60 members of  
55 Research Now's online panel community who were from low SEG's. Members of the pilot  
56 group were then invited to take part in a subsequent telephone interview asking about  
57  
58  
59  
60

the survey. Interviews were conducted with 25 pilot survey responders. Questions focused on question clarity, survey length and whether responders felt the survey to be neutral. Some minor amendments to wording were made in light of the responses. The main survey was then conducted in September 2012. Surveys recorded online took, on average, 17 minutes to complete and each responder received a small payment (around £2) from Research Now.

Survey data were organised and analysed using SPSS statistical software version 20 (Chicago, IL: SPSS Inc; 2011). Initial univariate descriptive statistics were obtained for the entire study. Pearson Chi-square was used to examine demographic factors associated with willingness to donate and preference for different consent models. Those associations that were found to be significant ( $p \leq 0.05$ ) were then entered into a multiple logistic regression to explore the predictivity of these variables. Before running the model, we tested for multicollinearity among the independent variables. No multicollinearity issues were found.

## RESULTS

### Study populations

Participant characteristics are detailed in Table 2.

Table 2: Participant characteristics

| Characteristic              | Focus group<br>N=81 | Survey<br>N=1110 |
|-----------------------------|---------------------|------------------|
| <b>Gender</b>               |                     |                  |
| Male                        | 33; 41%             | 504; 45%         |
| Female                      | 48; 59%             | 606; 55%         |
| <b>Age</b>                  |                     |                  |
| 18-24                       | 13; 16%             | 135; 12%         |
| 25-34                       | 18; 22%             | 184; 17%         |
| 35-44                       | 19; 23%             | 198; 18%         |
| 45-54                       | 10; 12%             | 184; 17%         |
| 55-64                       | 16; 20%             | 176; 16%         |
| 65+                         | 5; 6%               | 233; 21%         |
| <b>Socio-economic group</b> |                     |                  |
| A                           | 9; 11%              | 41; 4%           |
| B                           | 22; 27%             | 215; 19%         |
| C1                          | 24; 30%             | 311; 28%         |
| C2                          | 14; 17%             | 233; 21%         |
| D                           | 6; 7%               | 145; 13%         |
| E                           | 6; 7%               | 165; 15%         |
| <b>Region</b>               |                     |                  |
| East of England             | 7; 7%               | 92; 8%           |
| East Midlands               | -                   | 57; 5%           |
| London                      | 18; 22%             | 213; 19%         |
| North East                  | -                   | 40; 4%           |
| North West                  | -                   | 121; 11%         |

|                       |         |          |
|-----------------------|---------|----------|
| Northern Ireland      | -       | 30; 3%   |
| Scotland              | 14; 17% | 76; 7%   |
| South East            | 14; 17% | 165; 15% |
| South West            | -       | 81; 7%   |
| Wales                 | -       | 51; 5%   |
| West Midlands         | 14; 17% | 94; 8%   |
| Yorkshire/Humberlands | 14; 17% | 90; 8%   |

**Ethnicity**

|                            |         |           |
|----------------------------|---------|-----------|
| White or White British     | 54; 67% | 1057; 95% |
| Mixed race                 | 1; 1%   | 7; 1%     |
| Asian or Asian British     | 10; 12% | 18; 2%    |
| Black or Black British     | 9; 11%  | 19; 2%    |
| Chinese or Chinese British | 7; 9%   | 2; 0%     |
| Other ethnic group         | 0; 0%   | 4; 0%     |
| Prefer not to say          | 0; 0%   | 3; 0%     |

**Religion**

|                   |  |          |
|-------------------|--|----------|
| Christianity      |  | 677; 61% |
| Islam             |  | 13; 1%   |
| Hinduism          |  | 6; 1%    |
| Sikhism           |  | 0; 0%    |
| Judaism           |  | 6; 1%    |
| Buddhism          |  | 11; 1%   |
| Other religion    |  | 15; 1%   |
| No religion       |  | 370; 33% |
| Prefer not to say |  | 12; 1%   |

**Religiosity**

|                      |  |          |
|----------------------|--|----------|
| Not at all religious |  | 234; 32% |
| Moderately religious |  | 422; 58% |
| Very religious       |  | 64; 9%   |
| Prefer not to say    |  | 8; 1%    |

**Education**

|                                                      |         |          |
|------------------------------------------------------|---------|----------|
| No formal qualification                              | 15; 19% | 70; 6%   |
| GCSE, O level, Scottish Standard Grade or equivalent | 19; 23% | 264; 24% |
| GCE, A-level, Scottish Higher or similar             | 17; 21% | 214; 19% |
| Vocational (BTEC/NVQ/Diploma)                        | -       | 230; 21% |
| Degree level or above                                | 30; 37% | 317; 29% |
| Prefer not to say                                    | -       | 15; 1%   |

**Self reported knowledge of medical research process**

|                |  |          |
|----------------|--|----------|
| No knowledge   |  | 463; 42% |
| Some knowledge |  | 603; 54% |
| Good knowledge |  | 44; 4%   |

**Have you been affected by a disability or illness?**

|     |  |          |
|-----|--|----------|
| Yes |  | 399; 36% |
| No  |  | 711; 64% |

**Has a close family member been affected by a disability or illness?**

|     |  |          |
|-----|--|----------|
| Yes |  | 767; 69% |
| No  |  | 343; 31% |

**Have you had blood or tissue removed during a medical procedure?**

|     |  |          |
|-----|--|----------|
| Yes |  | 446; 40% |
| No  |  | 553; 50% |

|                                                                                 |  |          |
|---------------------------------------------------------------------------------|--|----------|
| Don't know                                                                      |  | 111; 10% |
| <b>Have you ever been asked to donate blood or tissue for medical research?</b> |  |          |
| Yes                                                                             |  | 182; 16% |
| No                                                                              |  | 904; 81% |
| Don't know                                                                      |  | 24; 2%   |
| <b>If so, did you agree to donate?</b>                                          |  |          |
| Yes                                                                             |  | 155; 85% |
| No                                                                              |  | 23; 13%  |
| Don't know                                                                      |  | 4; 2%    |

Note: percentages may not add up to 100 due to rounding.

### Focus groups

One hundred and eighty-two members of the public who were approached were eligible to participate (i.e. they fitted the criteria for a particular focus group) and 81 people agreed to participate (45% participation rate; 48 women, 33 men). There were seven participants in each focus group apart from the 18-25 age group and high SEG group (eight participants in each); serious/chronic illness group and healthy volunteers group (six participants in each) and the pilot group (five participants).

### Survey

Four thousand six hundred and seven people were invited to take part in the survey; 2014 did not respond, 860 began completing the survey but did not finish, 102 did not qualify to continue (e.g. they were under 18 years old), 521 qualified for the survey but the quota was full and 1110 completed the questionnaire (28% response rate excluding those who did not qualify and where the quota was full). This response rate is comparable to similar studies on this topic[16]. Our participant quotas closely, though not exactly, matched our targets based on the UK population data as provided by the ONS. For this reason we carried out both weighted and un-weighted analyses. There was no difference in the conclusions we reached by either method. In this paper we present the un-weighted results (weighted results can be found at supplementary data file Appendix V).

### Importance of asking for consent

The majority of survey participants believed that obtaining consent for the use of residual biosamples was either extremely important (55%) or important (25%). Only 4% selected 'not at all important'. Focus group participants also saw the consent process as important and cited reasons including: that it was "polite", "respectful" and "morally correct" to ask permission; that it enabled people to feel they had made a contribution and an active choice; that it provided control, in particular for those people that might not want their biosamples to be used, for example for religious reasons; that taking

without asking was akin to theft; and that it was important in order to maintain trust between patients and doctors.

*"It then doesn't allow them to take liberties or advantage of the fact that you're out cold having an operation and someone says 'Oh we need a bit of that'."* Male, patient – had operation in past 2 years.

A small minority did not feel that consent was important, the main reasons being that they did not want the tissue back, that once it was removed it no longer 'belonged to them', and that the tissue would just go to waste otherwise.

Survey participants were asked what would be their preferred method of consenting to donate leftover biosamples for research use. The majority (65%) wanted to do so face-to-face with a health professional; 15% wanted to complete a form and return it by post. This issue was not specifically addressed with focus group participants due to time constraints.

### Preference for 'opt-in' or 'opt-out' consent

Participants were asked whether they preferred an opt-in or opt-out model of consent for donating residual biosamples. The results of the survey showed that opt-in consent was preferred by over half of the participants (55%), 28% preferred opt-out, 14% had no preference and 4% selected 'don't know'. Participants who were significantly more likely to prefer opt-in consent were: from a low SEG (E) (79.8% vs. 64.1%,  $X^2=11.13(1)$ ,  $p=0.001$ ); over 65 years (75.1% vs. 64%,  $X^2=7.68(1)$ ,  $p=0.006$ ); had a religious affiliation (68.8% vs. 61.2%,  $X^2=4.84(1)$ ,  $p=0.028$ ); and had an education level of GCSE or lower (71.1% vs. 63.9%,  $X^2=3.89(1)$ ,  $p=0.048$ ). The strongest significant predictor for preferring opt-in consent was being from a low SEG (E) (OR=2.22, 95% CI 1.41-3.57,  $p=0.001$ ) followed by having a religious affiliation (OR=1.36, 95% CI 1.01-1.81,  $p=0.04$ ) (Table 3).

Table 3: Multiple logistic regression of participant preferences for consent models

| Participant characteristic        | Coefficient | 95% CI     | Odds ratio | p value |
|-----------------------------------|-------------|------------|------------|---------|
| Preference for opt-in consent     |             |            |            |         |
| Socio-economic group              | 0.806       | 1.41, 3.57 | 2.22       | 0.001   |
| Religion                          | 0.304       | 1.01, 1.81 | 1.36       | 0.04    |
| Preference for consent every time |             |            |            |         |
| Religion                          | 0.72        | 1.05, 4.00 | 2.04       | 0.036   |
| Age                               | 0.47        | 1.07, 2.41 | 1.60       | 0.023   |
| Preference for specific consent   |             |            |            |         |
| Opt-in                            | 1.52        | 3.30, 6.35 | 4.58       | <0.001  |
| Ethnicity                         | 1.08        | 1.23, 7.14 | 2.94       | 0.015   |
| Preference for generic consent    |             |            |            |         |
| Opt-out                           | 1.52        | 3.13, 6.67 | 4.55       | <0.001  |



|                                       |      |            |      |       |
|---------------------------------------|------|------------|------|-------|
| Religion                              | 0.04 | 1.08, 2.72 | 1.56 | 0.021 |
| Knowledge of medical research process | 0.44 | 1.06, 2.28 | 1.56 | 0.024 |

Demographic items were excluded from this table if none was statistically significant. All variables were entered into the models as categorical variables.

CI: Confidence Interval.

Focus group participants preferred opt-out consent ( $n=46$ ; 57%) over opt-in consent ( $n=29$ ; 36%), with 6 participants (7%) unsure, after in-depth discussion around the benefits and disadvantages of each approach. The main benefit of opt-out consent cited by participants was that more biosamples would be available and consequently spur research. Other reasons included: that it would be less costly administratively; that it maximised the value of left over biosamples; that patients wouldn't have to consider it every time they were having an operation or blood test; that those that did not want to donate still had the opportunity to opt-out; and that it would 'normalise' donating leftover biosamples which would be a positive step.

*"It would an incentive for society if everyone knew that this is what happens routinely, but you can choose not to be involved. It would be more like 'that's normal'."* Male, aged 18-24 group

Those that preferred the opt-in approach cited the following reasons as to why: an active choice whereby participants had to act on a decision to take part was preferable to a passive choice whereby consent was assumed; it enabled people to have more control over their biosamples; it was truly 'informed consent' in the context of donating surplus samples for research (rather than as part of a clinical trial; clinical trials were outside the scope of the study) and hence more ethically acceptable; it enabled people to feel that they were making a positive contribution and would prevent the problem of vulnerable groups not being aware they were automatically 'opted-in'.

*"There are going to be members of the public who are not going to always be able to consider rationally themselves what it actually means."* Female, healthy volunteer

Whilst the majority of focus group participants overall preferred opt-out consent, the results were different for the three minority ethnic groups ("Black", "S. Asian", "Chinese"), where opt-in consent was favoured by the majority.

### **Consent once for life or consent every time**

The most prevalent system in current use for donating new biosamples that are surplus to clinical requirements in the UK is the opt-in approach, with potential donors being asked for consent every time a procedure is performed that may result in a biosample becoming available for research. (The law allows for the use of diagnostic archives for



1  
2  
3 research without consent as long as certain criteria are met). Participants were therefore  
4 asked to consider variations on this model and state whether they preferred: (1) consent  
5 once for life, covering all subsequent biosamples, until or unless the donor decides to  
6 withdraw consent; (2) consent every time samples surplus to diagnostic requirements  
7 may become available, or (3) consent at certain points in life. Consent every time (43%)  
8 was preferred by the majority of survey participants, followed by consent at certain  
9 points (27%) and consent once for life, e.g. at aged 18, (21%). Seven percent had no  
10 preference and 2% didn't know. Groups who were significantly more likely to prefer  
11 consent every time compared to consent once for life were: under 55 years (70.3% vs.  
12 60.9%;  $\chi^2=5.88(1)$ ,  $p=0.015$ ); had no knowledge of the research process (72.3% vs.  
13 63.4%;  $\chi^2=5.77(1)$ ,  $p=0.016$ ); or were either not at all or moderately religious (70.2%  
14 vs. 51.3%;  $\chi^2=5.1(1)$ ,  $p=0.024$ ). When entered into the regression analysis, the  
15 strongest significant predictor for preferring consent every time was being not at all or  
16 moderately religious (OR=2.04; 95% CI 1.05-4.00,  $p=0.036$ ) followed by being under  
17 55 years (OR=1.60; 95% CI 1.07-2.41,  $p=0.023$ ) (Table 3).  
18  
19

20  
21 Unlike survey responders, focus group participants favoured consent once for life ( $n=35$ ;  
22 43%) followed by consent every time samples surplus to diagnostic requirements may  
23 become available ( $n=27$ ; 33%) and consent at certain points ( $n=16$ ; 20%) with three  
24 choosing don't know (4%). Like opt-out consent, consent once for life was seen to be  
25 better as it was "quicker" and "easier" administratively and prevented researchers from  
26 "losing out". Consent provided most control for participants as you would "know the  
27 specific purpose of it", particularly if the sample was considered to be sensitive e.g.  
28 eggs; allowed "no room for error"; and enabled people to change their mind easily.  
29  
30

31  
32  
33  
34  
35  
36  
37  
38  
39  
40  
41  
42  
43  
44  
45  
46  
47  
48  
49  
50  
51  
52  
53  
54  
55  
56  
57  
58  
59  
60  
*"You may feel differently [depending on] what tissue is being donated and for what  
purpose the research is being carried out."* Female, aged 18-24 group

Some participants had concerns about how consent preferences (e.g. what types of  
research they were willing to donate a biosample for), would follow them across the  
healthcare system if a 'consent once for life' model was adopted. Consent at certain  
points was seen by some as a good middle ground as patients would still have some  
control, but would not have to go through the consent process every time they had a  
medical procedure. Examples of consent at certain points included every "five or ten  
years", or at the beginning of particular episodes of care such as pregnancy or cancer  
treatment.

### **Models of consent for research use of biosamples**

1  
2  
3 Survey participants were presented with four consent models (Table 1), and asked  
4 whether they would consider consenting residual biosamples to each of them, providing  
5 the research had been approved by a research ethics committee (described as a  
6 committee usually made up of doctors, scientist, patients and the general public which  
7 ensure any research allowed to be done is for the benefit of patients). Eighty percent  
8 would agree to specific consent – once only; 77% would consent to specific consent – for  
9 every new study; 71% would agree to tiered consent; and 67% of participants would  
10 agree to generic consent. When asked which model they preferred, specific consent - for  
11 every new study, was the first choice amongst those who had a preference (30% of  
12 participants overall), followed by generic consent and specific consent- once only, jointly  
13 second (both 18%), and lastly tiered consent (14%). Sixteen percent had no preference  
14 and 6% didn't know.

15  
16  
17  
18  
19  
20  
21 After collapsing the two specific consent models together (specific consent - for every  
22 new study and specific consent – once only), those participants who preferred specific  
23 consent were significantly more likely to: have a religious affiliation (63.9% vs. 48.9%,  
24  $X^2=16.88(1)$ ;  $p<0.001$ ); live in the North East or Scotland (60.9% vs. 42.7%,  
25  $X^2=10.23(1)$ ,  $p=0.001$ ); be over 65 years (67.1% vs. 57.1%,  $X^2=5.31(1)$ ,  $p=0.021$ );  
26 and be of a non-'White' ethnicity (68.9% vs. 58%,  $X^2=4.17(1)$ ,  $p=0.041$ ). Using the  
27 boost sample we found that 'Black' participants were significantly more likely to prefer  
28 specific consent models compared with 'White' participants (75.6% vs. 58%,  
29  $X^2=4.31(1)$ ,  $p=0.038$ ). Those people who preferred opt-in consent were also more likely  
30 to prefer specific consent models (71.1% vs. 35.3%,  $X^2=91.72(1)$ ,  $p<0.001$ ). The  
31 strongest significant predictor for preferring specific consent was preferring opt-in  
32 consent (OR=4.58, 95% CI 3.30-6.35,  $p<0.001$ ) followed by being of non-'White'  
33 ethnicity (OR=2.94, 95% CI 1.23-7.14,  $p=0.015$ ) (Table 3).

34  
35  
36  
37  
38  
39  
40  
41 We also looked at who was most likely to prefer generic consent, the least restrictive of  
42 the proposed consent models. Those that preferred generic consent were significantly  
43 more likely to: have no religious affiliation (51.1% vs. 36.1%,  $X^2=15.97(1)$ ,  $p<0.001$ );  
44 have some or good knowledge of the medical research process (26.1% vs. 18.3%,  
45  $X^2=6.79(1)$ ,  $p=0.009$ ); be male (26.8% vs. 19.9%,  $X^2=5.40(1)$ ,  $p=0.02$ ); and be from a  
46 higher SEG group (A-D) (24.3% vs. 15.1%,  $X^2=4.66(1)$ ,  $p=0.031$ ). They were also  
47 significantly more likely to prefer opt-out consent (64.7% vs. 28.9%,  $X^2=91.72(1)$ ,  
48  $p<0.001$ ). The strongest significant predictor for preferring generic consent was  
49 preferring opt-out consent (OR=4.55, 95% CI 3.13-6.67,  $p<0.001$ ) followed by having  
50 no religious affiliation (OR=1.56, 95% CI 1.08-2.72,  $p=0.021$ ) and some or good  
51 knowledge of the medical research process (OR=1.56, 95% CI 1.06-2.28,  $p=0.024$ )  
52 (Table 3).

1  
2  
3 Focus group preferences differed from those of survey responders with generic and  
4 tiered consent being equally popular (n=36; 44% and n=35; 43% respectively). Specific  
5 consent – once only, was least popular (n=6; 7%) (this was the only specific consent  
6 model given to participants). Four participants (5%) didn't know. Generic consent was  
7 valued as it provides most "flexibility for researchers"; reduces the likelihood residual  
8 biosamples will go to waste; is more straightforward to put in place; is "simpler to  
9 understand"; and enables biosamples to be used for more than "one specific thing".

10  
11  
12  
13  
14 *"It's better not to restrict the possible use of the sample because by restricting it you're*  
15 *increasing the chance that it'll go to waste. You want the highest probability that*  
16 *something good will come from it."* Male, patient – affected by a condition

17  
18  
19 It was also the consent model favoured by all participants who were affected by an  
20 illness or disability.

21  
22  
23 Tiered consent was valued because it provided more control over donated biosamples  
24 than generic consent, allowing people to opt-out of certain types of research, and  
25 therefore provided "clarity and peace of mind". All but one participant in the 'Black' focus  
26 group and all participants who had donated biosamples as healthy volunteers preferred  
27 tiered consent. Whilst specific consent was seen to provide the most control and enabled  
28 participants to have "some understanding of what it might be used for", concerns raised  
29 were that it "can't be used for anything else", "could be wasted" and would require a  
30 time-consuming explanation from health professionals.

31  
32  
33 In both the survey and focus groups, the donation of potentially sensitive biosamples  
34 produced a preference for specific consent. In the survey, a quarter (25%) preferred  
35 specific consent – for every new study, 22% preferred specific consent – once only, 12%  
36 preferred generic consent and 9% preferred tiered consent. Nineteen percent had no  
37 preference and 13% didn't know. When discussing donation of eggs, one woman  
38 commented:

39  
40  
41  
42  
43  
44  
45  
46 *"People could reproduce a child or whatever and it's about the personal-ness of what's*  
47 *been taken from you. So if it's a bit of blood, yeah take it, I mean you just cut yourself*  
48 *and blood is gone, but if it's something that's quite personal you only have every now*  
49 *and again, that needs to be guarded."* Female, 'Black' ethnicity group

50  
51  
52  
53 We asked survey participants whether they would like to be kept up-to-date with  
54 research going on at a particular hospital or biobank to which they had donated a  
55  
56  
57  
58  
59  
60

1  
2  
3 biosample. Eighty-five percent said they would be interested; the most popular methods  
4 to receive updates were via a website (27%), email (27%) or letter (22%).  
5  
6

## 7 **DISCUSSION**

8  
9  
10 This study contributes further to our understanding of the UK public's views and  
11 preferences towards consent for the use of biosamples in medical research. In summary,  
12 we have found that: 1) the consenting process was perceived as important in order to  
13 maintain trust between patients and health professionals and respect patient autonomy;  
14 2) survey participants exhibited a desire to retain active choice and control when  
15 donating biosamples and over the uses to which their biosamples might be put, and 3)  
16 these results differ from those reported during focus group discussions, where  
17 preference was for less restrictive consent models that are likely to increase availability  
18 of biosamples. These differences might be accounted for by the fact that focus group  
19 participants were given more background information about the use of residual  
20 biosamples in research and had time to consider the benefits and disadvantages of the  
21 different approaches. These interventions may have allayed any anxieties participants  
22 had about relinquishing control of their biosamples and seem to have encouraged  
23 participants to choose approaches that maximised biosample access to researchers,  
24 highlighting the importance and potential impact of education on influencing public  
25 perception in this area.  
26  
27  
28  
29  
30  
31  
32

33  
34 The preference for opt-in consent identified in the survey is consistent with the results of  
35 other studies in this area[3,15,16]. One reason for this preference may be that it  
36 matches the current system for organ donation for transplant in the UK. It was also  
37 perceived as being truly informed consent by some participants (although it is worth  
38 noting that it is the information provided to potential donors that guarantees consent is  
39 informed rather than the consent mechanism). Nevertheless, the sizeable number of  
40 survey responders who preferred opt-out consent (27%) coupled with the preference for  
41 opt-out amongst focus group participants (57%) does suggest that there may be  
42 broader support than previously believed for this approach. This point is also supported  
43 by the finding that fewer than half of survey participants wanted to be consented every  
44 time a sample was taken and nearly 30% preferred consent at certain points. Alternate,  
45 more streamlined approaches to consenting should therefore be considered and  
46 evaluated. Interestingly, our results showed that preference for opt-out consent was  
47 associated with being younger (under 65 years), from a higher SEG and a higher  
48 education level. These demographic groups may be more trusting of medical institutions  
49 to use residual biosamples appropriately, or perhaps feel empowered to be able to opt-  
50 out if so desired, for example, online. Similar findings have been reported in relation to  
51  
52  
53  
54  
55  
56  
57  
58  
59  
60

1  
2  
3 organ donation; a study by Gimbel et al. found an association between cadaveric  
4 donation rate and percentage of the population enrolled in third-tier education[25].  
5 Internet access has also been found to correlate with increased organ donation[26].  
6  
7

8 Concerning consent models for research use of biosamples, the majority of people (69%)  
9 were willing to donate biosamples via the least restrictive model, generic consent. A  
10 study conducted in Sweden found a similar percentage of the general public were happy  
11 to agree to generic consent (67%), whereby surrogate decisions were performed by a  
12 research ethics committee[27]. Other national studies have found the acceptability of  
13 generic consent amongst the general public and in particular patients to be higher,  
14 between 79%-95%[4,28-31]. Nevertheless, our survey findings suggest that willingness  
15 to donate increased where greater choice and control over research participation is  
16 retained, although the difference between those who were willing to agree to generic  
17 compared to specific was only 13%. Similarly, when survey responders were asked  
18 about their preferred approach, their preference was also for specific consent for every  
19 new study that might be conducted using their biosample. This may indicate a general  
20 interest in how samples are being used. This notion is supported by the high number of  
21 people who wanted ongoing contact about the research leading from their donation.  
22 Moreover, they may have not considered the practicalities of being asked to consent  
23 every time their sample is used, and the high level of recontact they might receive from  
24 research teams. Nevertheless, it is important to take note of the fact that more tailored  
25 forms of consent represent an attractive approach to many people. While specific  
26 consent may be practical for individual research projects, this restriction would make  
27 biobanking challenging, as biobanks exist to facilitate access to samples for a wide  
28 variety of approved research projects without the need for additional consent. It may be  
29 that as more sophisticated biosample tracking and management systems are adopted,  
30 resources could become available to support more interactive forms of consent, and  
31 more biobanks could offer tiered consent, for example. Further public dialogue and  
32 information about the use of the samples may also provide the same assurances for  
33 people that arise from specific consent, as highlighted by the preference for less  
34 restrictive consent models amongst focus group participants.  
35  
36  
37  
38  
39  
40  
41  
42  
43  
44  
45  
46  
47

48 Evidence from other empirical studies looking at preferences for consent models is  
49 mixed. UK studies focusing on donations purely for research by 'healthy volunteers' to  
50 biobanks (i.e. not donating residual biosamples) have identified a preference for specific  
51 consent,[19,32] as did a study conducted in the USA that also focused on healthy  
52 volunteers[15]. In a pan-European survey, the majority of the UK public also preferred  
53 specific consent for every new study, although the percentage that did was slightly lower  
54 than the overall European average (65% compared to 67%)[33]. It was, however,  
55  
56  
57  
58  
59  
60

1  
2  
3 higher than in Denmark and Finland, where the percentage of people who wanted to be  
4 re-contacted for every new study was lower at 51% and 54% respectively. These  
5 countries were also found to have very few concerns about the collection of personal  
6 information by biobanks and had high levels of trust in ethics committees. Other  
7 empirical work conducted in the USA, Canada, Sweden and Spain has shown that public  
8 preference is for generic consent[3,16,18,34,35]. These findings highlight the divergence  
9 of opinion on this issue, in particular in different contexts and with different information  
10 provision, although the difficulty of comparing across studies with different  
11 methodologies and backgrounds must also be taken into account. Notably, where  
12 participants had some or good knowledge of the research process and where there was  
13 in-depth discussion (i.e. during focus groups), participants were more likely to prefer  
14 generic consent, a finding that has also been identified elsewhere in the literature[36]  
15 and supports the need for information and education if increasing the acceptability of  
16 generic consent is deemed desirable. Focus group participants affected by an illness or  
17 disability were also found to prefer generic consent, and is likely to reflect the fact that  
18 they have greater interests at stake[37]. Preference for specific consent was found to be  
19 associated with being over 65 years and from a non-‘White’ ethnicity, findings which  
20 resonate with other studies[3,38,39]. Consent documentation and written information  
21 targeted specifically at these particular groups may also help alleviate any specific  
22 concerns these groups may have.  
23  
24  
25  
26  
27  
28  
29  
30  
31  
32

33 This research into current public attitudes regarding biosample donation in the UK  
34 provides valuable guidance for biobanking governance. Whilst generic consent is the  
35 model largely endorsed by regulators and funders in the UK[9,11], the evidence from  
36 this study suggests that there is a need to address the potential concerns that some  
37 people may have about the minimal information and lack of control provided through  
38 this model. Education and opportunity for discussion may be one way to allay concerns,  
39 as demonstrated through focus groups. Keeping donors informed of current research  
40 taking place at the hospital or research institutions to which they donated also appears  
41 to be desirable and is likely to be both motivating and promote public trust and  
42 confidence in the research process, a finding reported elsewhere[40]. The opportunity  
43 for face-to-face discussion with an appropriately trained healthcare professional at the  
44 time of donation may also allay any potential concerns, and is indeed the approach  
45 usually taken in the UK at present. This approach has been found to yield high  
46 acceptance rates amongst patients of well over 90%[41-43].  
47  
48  
49  
50  
51  
52  
53

### 54 **Strengths and Limitations**

55  
56  
57  
58  
59  
60



1  
2  
3 This was a mixed methods study to explore public views and preferences towards  
4 consent for biosample donation. Integrating quantitative and qualitative approaches is  
5 valuable in exploratory research as it can strengthen the inferences made through  
6 triangulation and allow for a more nuanced understanding of the topic[44]. This study  
7 presented participants with a series of hypothetical questions about their preferences  
8 and willingness to donate residual biosamples for medical research. By presenting  
9 questions as 'real life' scenarios, we hoped to make the questions as realistic as possible.  
10 However, as with any hypothetical scenario, the findings may not necessarily correlate  
11 with actual behaviour.  
12

13  
14  
15  
16  
17 The questions for both the focus groups and the survey were piloted to ensure they were  
18 clear and understandable and were not biased towards any particular viewpoint.  
19 Nevertheless, many of the issues covered were complex, particularly around the  
20 meaning of the different consent models which may have contributed to the dropout  
21 rate. Focus groups participants were not presented with the option of 'specific consent –  
22 for every new study' (they were only given 'specific consent – once only'). This may  
23 have been an attractive option for some given that a concern raised was biosamples  
24 being wasted. However, given that the key reasons participants' valued generic consent  
25 were because it provided most flexibility to researchers and was most straightforward to  
26 administer, this seems unlikely. In addition, given time and resource constraints we were  
27 unable to explore whether 'stronger' consent models would have been preferable for  
28 organisations that donors trusted less. This is an area that would be worth exploring  
29 further in future research. Participants who did complete the survey may have done so  
30 because of strong feelings about the issues raised and this may have skewed the results;  
31 however, every effort was made to ensure that the results were as representative of the  
32 UK population as possible. The focus groups and survey were conducted in English and  
33 so the findings may not be representative of non-English speaking members of the  
34 general public. Future research might target these particular groups.  
35  
36  
37  
38  
39  
40  
41  
42

## 43 **CONCLUSION**

44  
45  
46 There is a general willingness amongst the UK population to donate biosamples for  
47 medical research. Our research suggests that there is a preference amongst the UK  
48 public for more information on the uses and outcomes of research, and ongoing choice  
49 and control over donated biosamples. Our study also supports the premise that  
50 increased knowledge and opportunity for discussion is associated with acceptance of less  
51 restrictive consent models.  
52  
53  
54  
55  
56  
57  
58  
59  
60

1  
2  
3 **Acknowledgements** We would like to thank Lisa Bennett, Sarah Dickson, Catherine  
4 Elliott, James Ironside and Chris Womack and for their helpful comments on this paper;  
5 Sarah Dickson, Jim Elliott and Neil Formstone for their contribution to the design of the  
6 study; and Samantha Reeve and Zheng Lei for help with data analysis.  
7  
8

9  
10 **Funding statement** This work was supported by a grant from the Technology Strategy  
11 Board through the Stratified Medicines Competition grant number 101021, direct  
12 financial contributions by AstraZeneca and resource in kind by AstraZeneca,  
13 GlaxoSmithKline and Lab 21.  
14

15  
16 **Competing interests:** Lesley Stubbins is an employee of GlaxoSmithKline. Mark  
17 Robertson is an employee of AstraZeneca.  
18

19  
20 **Contributors:** J.C. conceived the study. All authors contributed to the study design. In  
21 addition to all the authors, Sarah Dickson, Jim Elliott and the late Neil Formstone also  
22 contributed towards the design of the study and development of the focus group and  
23 survey questions. C.L. facilitated the focus groups. Focus group recruitment was  
24 conducted by the company The Focus Group; the survey was conducted through the  
25 market research company Research Now. C.L. conducted data analysis and  
26 interpretation with the help of Samantha Reeve and Zheng Lei. The initial draft of the  
27 manuscript was prepared by C.L and then circulated repeatedly among the authors for  
28 critical revision. All authors approved the final manuscript.  
29  
30  
31  
32

33  
34 **Ethical approval** This study was approved by the Ethics Review Board of the University  
35 of Manchester, reference 11459.  
36

37  
38 **Data sharing statement** Transcripts from the focus groups and full results of the  
39 survey are available from CL at [celine@geneticalliance.org.uk](mailto:celine@geneticalliance.org.uk). Supplementary material is  
40 also available at [www.geneticalliance.org.uk/projects/stratum\\_docs.htm](http://www.geneticalliance.org.uk/projects/stratum_docs.htm)  
41  
42  
43  
44

## 45 REFERENCES

- 46  
47  
48 1. Oosterhuis JW, Coebergh JW, van Veen EB. Tumour banks: well-guarded treasures in  
49 the interest of patients. *Nature reviews. Cancer* 2003;**3**:73-7.  
50  
51 2. Elger BS, Caplan AL. Consent and anonymization in research involving biobanks:  
52 differing terms and norms present serious barriers to an international framework.  
53 *EMBO reports* 2006;**7**:661-6.  
54  
55 3. Murphy J, Scott JCGC, Kaufman D, et al. Public Perspectives on Informed Consent for  
56 Biobanking. *American Journal of Public Health* 2009;**99**:2128-34.  
57  
58  
59  
60



- 1  
2  
3 4. Wendler D. One-time general consent for research on biological samples. *BMJ*  
4 2006;**332**:544-7.
- 5  
6 5. Allen J, McNamara B. Reconsidering the value of consent in biobank research.  
7 *Bioethics* 2011;**25**:155-66.
- 8  
9 6. Department of Health. The Human Tissue Act. 2004  
10 [http://www.dh.gov.uk/prod\\_consum\\_dh/groups/dh\\_digitalassets/@dh/@en/docu](http://www.dh.gov.uk/prod_consum_dh/groups/dh_digitalassets/@dh/@en/documents/digitalasset/dh_4103686.pdf)  
11 [ments/digitalasset/dh\\_4103686.pdf](http://www.dh.gov.uk/prod_consum_dh/groups/dh_digitalassets/@dh/@en/documents/digitalasset/dh_4103686.pdf) Accessed 11 November 2011.
- 12  
13 7. Hansson MG, Dillner J, Bartram CR, et al. Should donors be allowed to give broad  
14 consent to future biobank research? *Lancet Oncol* 2006;**7**:266-9.
- 15  
16 8. Hoeyer K. Donors perceptions of consent to and feedback from biobank research:  
17 Time to acknowledge diversity? *Public Health Genomics* 2010;**13**:345-52.
- 18  
19 9. Human Tissue Authority. Consent exemptions from the Human Tissue Act 2004  
20 <http://www.hta.gov.uk/licensingandinspections/consentexemptions.cfm> Accessed  
21 26 February 2013.
- 22  
23 10. Integrated Research Application System. Guidance document for researchers.  
24 [https://www.myresearchproject.org.uk/Help/Help%20Documents/PdfDocuments/](https://www.myresearchproject.org.uk/Help/Help%20Documents/PdfDocuments/researchtissuebank.pdf)  
25 [researchtissuebank.pdf](https://www.myresearchproject.org.uk/Help/Help%20Documents/PdfDocuments/researchtissuebank.pdf) Accessed 25 February 2013.
- 26  
27 11. Medical Research Council (MRC) and National Cancer Research Institute (NCRI). UK  
28 Funders' Vision for Human Tissue Resources, September 2011.
- 29  
30 12. Nuffield Council on Bioethics. Human bodies: donations for medicine and research.  
31 2011 [http://www.nuffieldbioethics.org/sites/default/files/Donation\\_full\\_report.pdf](http://www.nuffieldbioethics.org/sites/default/files/Donation_full_report.pdf)  
32 Accessed 26 February 2013.
- 33  
34 13. Petrini C. "Broad" consent, exceptions to consent and the question of using biological  
35 samples for research purposes different from the initial collection purpose. *Social*  
36 *Science and Medicine* 2010;**70**:217-20.
- 37  
38 14. Tupasela A, Sihvo S, Snell K, et al. Attitudes towards biomedical use of tissue sample  
39 collections, consent, and biobanks among Finns. *Scandinavian Journal of Public*  
40 *Health* 2010;**38**:46-52.
- 41  
42 15. Kaufman D, Bollinger J, Dvoskin R, et al. Preferences for opt-in and opt-out  
43 enrollment and consent models in biobank research: a national survey of  
44 Veterans Administration patients. *Genetics in medicine : official journal of the*  
45 *American College of Medical Genetics* 2012;**14**:787-94.
- 46  
47 16. Simon CM, L'Heureux J, Murray JC, et al. Active choice but not too active: Public  
48 perspectives on biobank consent models. *Genetics in Medicine* 2011;**13**:821-31.
- 49  
50 17. Willison DJ, Swinton M, Schwartz L, et al. Alternatives to project-specific consent for  
51 access to personal information for health research: insights from a public  
52 dialogue. *BMC Med Ethics* 2008;**9**:18.
- 53  
54  
55  
56  
57  
58  
59  
60

- 1  
2  
3 18. Kettis-Lindblad Å, Ring L, Viberth E, et al. Perceptions of potential donors in the  
4 Swedish public towards information and consent procedures in relation to use of  
5 human tissue samples in biobanks: A population-based study. *Scandinavian*  
6 *Journal of Public Health* 2007;**35**:148-56.  
7  
8 19. Shickle D, Hapgood R, Carlisle J, et al. Public attitudes to participating in UK  
9 Biobank. A public consultation on issues relating to feedback, consent, withdrawal  
10 and access: School of Health and Related research (SchARR). University of  
11 Sheffield, 2003.  
12  
13 20. Haddow G, Cunningham-Burley S, Murray L. Can the governance of a population  
14 genetic data bank effect recruitment? Evidence from the public consultation of  
15 Generation Scotland Public Underst Sci 2011117-29.  
16  
17 21. Start RD, Brown W, Bryant RJ, et al. Ownership and uses of human tissue: Does the  
18 Nuffield bioethics report accord with opinion of surgical inpatients? *BMJ*  
19 1996;**313**:1366-68.  
20  
21 22. Ipsos MORI Social Research Institute. Human Tissue Authority General Public  
22 Survey. 2010 [http://www.hta.gov.uk/  
23 db/ documents/2007-09-  
24 10 Ipsos MORI general public qual and quant report final 200709101952.pdf](http://www.hta.gov.uk/db/documents/2007-09-10_Ipsos_MORI_general_public_qual_and_quant_report_final_200709101952.pdf)  
25 Accessed 26 February 2013.  
26  
27 23. Miles JN, Shevlin M. *Applying regression and correlation: a guide for students and*  
28 *researchers*. London: Sage, 2001.  
29  
30 24. Cohen J. *Statistical power analysis for the behavioural sciences* 2nd ed. New York:  
31 Academic Press, 1988.  
32  
33 25. Gimbel RW, Strosberg MA, Lehrman SE, et al. Presumed consent and other  
34 predictors of cadaveric organ donation in Europe. *Prog Transplant* 2003;**13**:17-  
35 23.  
36  
37 26. Rithalia A, McDaid C, Suekarran S, et al. Impact of presumed consent for organ  
38 donation on donation rates: a systematic review. *BMJ* 2009;**338**:a3162.  
39  
40 27. Hoeyer K, Olofsson B-O, Mjörndal T, et al. Informed consent and biobanks: a  
41 population-based study of attitudes towards tissue donation for genetic research.  
42 *Scandinavian Journal of Public Health* 2004;**32**:224-29.  
43  
44 28. McQuillan GM, Porter KS, Agelli M, et al. Consent for genetic research in a general  
45 population: the NHANES experience. *Genetics in medicine : official journal of the*  
46 *American College of Medical Genetics* 2003;**5**:35-42.  
47  
48 29. Hoeyer K, Olofsson BO, Mjörndal T, et al. The ethics of research using biobanks:  
49 Reason to question the importance attributed to informed consent. *Archives of*  
50 *Internal Medicine* 2005;**165**:97-100.  
51  
52  
53  
54  
55  
56  
57  
58  
59  
60

- 1  
2  
3 30. Stegmayr B, Asplund K. Genetic research on blood samples stored for years in  
4 biobanks. Most people are willing to provide informed consent. *Lakartidningen*  
5 2003;**100**:618-20.  
6  
7 31. Malone T, Catalano PJ, O'Dwyer PJ, et al. High rate of consent to bank biologic  
8 samples for future research: the Eastern Cooperative Oncology Group experience.  
9 *Journal of the National Cancer Institute* 2002;**94**:769-71.  
10  
11 32. Gaskell G, Gottweis H, Starkbaum J, et al. Publics and biobanks: Pan-European  
12 diversity and the challenge of responsible innovation. *Eur J Hum Genet* 2012.  
13  
14 33. TNS Opinion & Social on request by the European Commission. Eurobarometer 73.1:  
15 Biotechnology. 2010  
16 [http://ec.europa.eu/public\\_opinion/archives/ebs/ebs\\_341\\_en.pdf](http://ec.europa.eu/public_opinion/archives/ebs/ebs_341_en.pdf) Accessed 15  
17 May 2013.  
18  
19 34. Master Z, Claudio JO, Rachul C, et al. Cancer patient perceptions on the ethical and  
20 legal issues related to biobanking. *BMC Med Genomics* 2013;**6**:8.  
21  
22 35. Valle-Mansilla JI, Ruiz-Canela M, Sulmasy DP. Patients' attitudes to informed consent  
23 for genomic research with donated samples. *Cancer investigation* 2010;**28**:726-  
24 34.  
25  
26 36. Gaskell G, Gottweis H. Biobanks need publicity. *Nature* 2011;**471**:159-60.  
27  
28 37. Tupasela A, Snell K. National interests and international collaboration: tensions and  
29 ambiguity among Finns towards usages of tissue samples. *New Genetics and*  
30 *Society* 2012;**31**:424-41.  
31  
32 38. Nilstun T, Hermeren G. Human Tissue Samples and Ethics. *Medicine, Health Care*  
33 *and Philosophy* 2006;**9**:81-86.  
34  
35 39. Ma Y, Kong X, Dai H, et al. Attitudes towards biosample donation in andrology  
36 patients. *International journal of andrology* 2012;**35**:170-5.  
37  
38 40. Haddow G, Cunningham-Burley S, Bruce A, et al. Generation Scotland: consulting  
39 publics and specialists at an early stage in a genetic database's development.  
40 *Critical Public Health* 2008;**18**:139-49.  
41  
42 41. Jack AL, Womack C. Why surgical patients do not donate tissue for commercial  
43 research: review of records. *BMJ* 2003;**327**:262.  
44  
45 42. Bryant RJ, Harrison RF, Start RD, et al. Ownership and uses of human tissue: what  
46 are the opinions of surgical in-patients? *Journal of clinical pathology*  
47 2008;**61**:322-26.  
48  
49 43. Wheeler J, Agarwal M, Sugden J, et al. Experiences from the front-line routine  
50 consenting of surplus surgically removed tissue: without investment by the  
51 National Health Service fully informed consent for all is not available. *J Clin Pathol*  
52 2007;**60**:351-4.  
53  
54  
55  
56  
57  
58  
59  
60

1  
2  
3  
4  
5  
6  
7  
8  
9  
10  
11  
12  
13  
14  
15  
16  
17  
18  
19  
20  
21  
22  
23  
24  
25  
26  
27  
28  
29  
30  
31  
32  
33  
34  
35  
36  
37  
38  
39  
40  
41  
42  
43  
44  
45  
46  
47  
48  
49  
50  
51  
52  
53  
54  
55  
56  
57  
58  
59  
60

44. Teddlie C, Tashakkori A. *Foundations of Mixed Methods Research: Integrating Quantitative and Qualitative Approaches in the Social and Behavioral Sciences*. Thousand Oaks, California: Sage Publications, Inc., 2009.

For peer review only

1  
2  
3 **Consent for the use of human biological samples for biomedical research – a**  
4 **mixed methods study exploring the UK public’s preferences**  
5  
6  
7

8  
9 Celine Lewis<sup>1</sup>, Margaret Clotworthy<sup>2</sup>, Shona Hilton<sup>3</sup>, Caroline Magee<sup>4</sup>, Mark J Robertson<sup>5</sup>,  
10 Lesley J Stubbins<sup>6</sup>, Julie Corfield<sup>7</sup>  
11

12 <sup>1</sup>Genetic Alliance UK, Unit 4D Leroy House, 436 Essex Road, London, N1 3LY, UK

13 <sup>2</sup>Human Focused Testing, 50 the Barns, Littleport, Cambridge, CB6 1GG, UK

14 <sup>3</sup>Medical Research Council/CSO Social & Public Health Sciences Unit, 4 Lilybank Gardens,  
15 Glasgow, G12 8RZ, UK  
16

17 <sup>4</sup>Confederation of Cancer Biobanks, National Cancer Research Institute, Angel Building,  
18 407 St John Street, London EC1V 4AD, UK  
19

20 <sup>5</sup>AstraZeneca, Science Policy & Relations, 11G43 Mereside, Alderley Park, Macclesfield,  
21 Cheshire SK10 4TF, UK  
22

23 <sup>6</sup>GlaxoSmithKline Medicines Research Centre, Gunnels Wood Road, Stevenage,  
24 Hertfordshire, SG1 2NY, UK  
25

26 <sup>7</sup>Areteva Ltd, BioCity, Nottingham, NG1 1GF, UK  
27  
28

29  
30 **Running title:** Consent for the use of biosamples - the UK public's preferences  
31  
32

33  
34 **Correspondence to:**  
35

36 Dr Celine Lewis

37 Genetic Alliance UK,

38 Unit 4D Leroy House,

39 436 Essex Road,

40 London,

41 N1 3QP  
42

43 **Email:** celine@geneticalliance.org.uk  
44  
45  
46

47  
48  
49  
50 **Keywords:** consent, biobanking, public views, public preferences, biomedical research  
51  
52

53  
54 **Word count:** 5306  
55  
56  
57  
58  
59  
60

**ABSTRACT**

**Objective:** A mixed methods study exploring the UK general public's views towards consent for the use of biosamples for biomedical research.

**Setting:** Cross-sectional population-based focus groups followed by an online survey.

**Participants:** Twelve focus groups (81 participants) selectively sampled to reflect a range of demographic groups; 1110 survey responders recruited through a stratified sampling method with quotas set on sex, age, geographical location, socio-economic group and ethnicity.

**Main outcome measures:** 1) Views on the importance of consent when donating residual biosamples for medical research; 2) preferences for opt-in or opt-out consent approaches; 3) preferences for different consent models.

**Results:** Participants believed obtaining consent for use of residual biosamples was important as it was "morally correct" to ask, and enabled people to make an active choice and retain control over their biosamples. Survey responders preferred opt-in consent (55%); the strongest predictor was being from a low socio-economic group (OR 2.22, 95% CI 1.41-3.57,  $p=0.001$ ) and having a religious affiliation (OR 1.36, 95% CI 1.01-1.81,  $p=0.04$ ). Focus group participants had a slight preference for opt-out consent because by using this approach more biosamples would be available and facilitate research. Concerning preferred models of consent for research use of biosamples, survey responders preferred specific consent with re-contact for each study for which their biosamples are eligible. Focus group participants preferred generic consent as it provided "flexibility for researchers" and reduced the likelihood that biosamples would be wasted. The strongest predictor for preferring specific consent was preferring opt-in consent (OR 4.58, 95% CI 3.30-6.35,  $p=0.015$ ) followed by non-'White' ethnicity (OR 2.94, 95% CI 1.23-7.14,  $p<0.001$ ).

**Conclusions:** There is a preference amongst the UK public for ongoing choice and control over donated biosamples, however increased knowledge and opportunity for discussion is associated with acceptance of less restrictive consent models for some people.

## ARTICLE SUMMARY

### Article focus

- To explore views of the UK public on the importance of consent being sought to the use of residual biosamples for medical research;
- The publics' preferences for opt-in or opt-out approaches to consent;
- The publics' preferences for generic, tiered or specific consent.

### Key messages

- Obtaining consent for the use of residual biosamples for biomedical research was perceived as important by members of the general public.
- Survey participants exhibited a desire to retain active choice and control when donating biosamples and over the uses to which their biosamples might be put, preferring an opt-in system and specific consent, however these results differ from those reported during focus group discussions, where preference was for less restrictive consent models (an opt-out system and generic consent) that are likely to increase availability of biosamples.
- These differences might be accounted for by the fact that focus group participants were given more background information about the use of residual biosamples in research and had time to consider the benefits and disadvantages of the different approaches.

### Strengths and limitations of this study

- This study contributes further to our understanding of the UK public's views and preferences towards consent for the use of biosamples in medical research. Our study supports the premise that increased knowledge and opportunity for discussion is associated with acceptance of less restrictive consent models.
- Due to the hypothetical nature of the study, the findings may not necessarily correlate with actual behaviour.

## INTRODUCTION

Human biological samples (biosamples), including organs, tissues, biofluids such as blood, and their derivatives, are increasingly important resources for biomedical research[1,2]. For example, they can help us to understand how we diagnose, categorise and treat a whole variety of medical conditions including cancer[1] and are particularly important when studying rare diseases or conditions where biosamples are hard to obtain. Biosamples are donated by either healthy volunteers or patients, either through specific research studies or as residual tissues or biofluids surplus to diagnostic requirements, or post mortem. Biosamples can be used fresh or can be first stored in a biobank, a collection of biosamples often linked with the donors' clinical and demographic information, as biosample attributes. Here, the quality of the data linked to the biosample is as important as the quality of the biosamples themselves, providing essential context within which to design analyses and interpret results or carry our further experimental studies. Clinical data may also be enriched with lifestyle and environmental information[3].

It is widely accepted that that donor consent should be sought and obtained before biosamples can be used in research[4,5]. Consent in research ethics relates to ensuring respect for the autonomy and dignity of the donors (research participants) and protecting them from abuse[5] and In fact, in England, Wales and Northern Ireland, the Human Tissue Act establishes donor consent as the baseline principle for the retention and use of organs and tissue for purposes beyond diagnosis and treatment, although further statutory consent exemptions do exist in certain circumstances, notably use of anonymised tissue from the living for research ethics committee (REC) approved research projects[6]. The value of biobanks, in supporting broad, long-term research purposes, means that the model of the consent process needs to be considered in order to ensure that it is valid and appropriate. A number of different consent frameworks which address consent scope and process have been proposed as a result[5]. However, there is continued debate as to which is the most appropriate in various situations[4,7,8].

Both the Human Tissue Authority[9] and National Research Ethics Service[10] recommend generic consent (Table 1), a view that has also been endorsed by UK research funders[11] and the Nuffield Council on Bioethics[12]. One commonly cited criticism of generic consent is that it is not sufficiently 'informed' as future research uses are not known at the time of donation[13]. Empirical research examining public and patient preferences has highlighted that there is no clear consensus on the issue, with



specific consent being identified as the most favoured form of consent in some studies[14,15], and generic consent in others[16-18].

Table 1: Approaches to consent of biosamples

| <b>Initial consent methods</b>                |                                                                                                                                                                                                                                                                                                                      |
|-----------------------------------------------|----------------------------------------------------------------------------------------------------------------------------------------------------------------------------------------------------------------------------------------------------------------------------------------------------------------------|
| Opt-in consent                                | The storage and use of biosamples for research on the basis that the donor has actively agreed to do so.                                                                                                                                                                                                             |
| Opt-out consent                               | The storage and use of samples for research on the basis that the donor has not objected, after previously being given the opportunity to do so.                                                                                                                                                                     |
| <b>Opt-in consent methods</b>                 |                                                                                                                                                                                                                                                                                                                      |
| Consent once for life                         | Consent is provided once for life for use of any residual samples for research with the option of withdrawing permission at a later stage if the donor wishes to do so.                                                                                                                                              |
| Consent at certain points                     | Consent is provided at certain points for use of residual biosamples for research, e.g. every 10 years or at the beginning of a particular episode of care.                                                                                                                                                          |
| Consent every time                            | Consent is requested every time residual biosamples may become available for use in research.                                                                                                                                                                                                                        |
| <b>Consent for research use of biosamples</b> |                                                                                                                                                                                                                                                                                                                      |
| Generic consent                               | Consent to the use of donated samples for a range of unknown uses, on the basis of general information about those possible uses and about the governance arrangements in place. <u>Also referred to as 'broad' or 'blanket' consent.</u>                                                                            |
| Tiered consent                                | A more restricted form of consent for use of samples, where the donor is invited to agree to the use of their samples in unknown projects, but given the option of specifying particular categories of research that they wish to exclude e.g. embryonic research. <u>Also referred to as 'categorical' consent.</u> |
| Specific consent –once only                   | Consent to the use of donated samples for a specified study only, on the basis of information provided about that study. Any residual sample will be discarded at the end of that study.                                                                                                                             |
| Specific consent – for every new study        | Consent to the use of donated samples for a specified study, on the basis of information provided about that study. However, participants are re-contacted and asked to consider participating in every new study for which their biosamples are eligible.                                                           |

Note: Consent terms were selected based on common usage within the UK biobanking system (for example, generic consent is the term used by the Human Tissue Authority, National Research Ethics Service, and National Cancer Research Institute) and definitions chosen in consultation with a team of representatives from universities, hospital biobank staff, pathologists and industry.

1  
2  
3 The 2011 Nuffield Council report on donation of human material for medicine and  
4 research also recommends that research funders should work to increase public  
5 awareness of the key role of donated tissue in scientific and clinical research[12]. Public  
6 trust and confidence in the consent process is of paramount importance to maintain and  
7 increase public support for donation and use of biosamples for biomedical research in the  
8 UK. For this reason, it is important to understand and inform public opinion to ensure  
9 consent models are aligned to public expectations and preferences. Whilst numerous  
10 international studies have been conducted which focus on consent preferences, research  
11 conducted in the UK has tended to focus on large scale population biobanks, such as UK  
12 Biobank[19] or Generation Scotland[20], which require ongoing contact with donors, or  
13 on the views of patients on the donation of residual biosamples[21]. The current study  
14 was conducted to broaden our understanding of the UK public's views on biosample  
15 donation for biomedical research. Moreover, the findings are intended to inform a  
16 biobanking policy for STRATUM (Strategic Tissue Repository Alliance Through Unified  
17 Methods), a Technology Strategy Board<sup>i</sup> and pharmaceutical industry-funded project  
18 seeking to address the problem of insufficient numbers of biosamples and associated  
19 clinical data of adequate quality to fully support biomedical research in the UK.  
20  
21

22  
23 The specific aims of this study were to 1) identify participants' views on the importance  
24 of consent when donating residual biosamples for medical research; 2) explore  
25 preferences for opt-in or opt-out approaches to consent; and 3) explore preferences for  
26 different consent models (Table 1). Public willingness to donate biosamples, views on  
27 donation of different biosample types, and conditions of their use (by which  
28 organisations and for which types of research) are reported elsewhere (Public views on  
29 the donation and use of human biological samples in biomedical research – a mixed  
30 methods study, 2013, unpublished manuscript).  
31  
32

## 33 **METHODS**

34  
35 This was a mixed methods study comprising qualitative focus groups and a quantitative  
36 on-line survey. Ethical approval for the study was granted by the University of  
37 Manchester Research Ethics Committee in April 2012.  
38  
39

### 40 **Focus groups**

41  
42 Twelve focus groups (including one pilot group) were conducted between May and July  
43 2012 in six different geographic locations across the UK. Participants were recruited  
44 face-to-face in the street by a market research company The Focus Group. Participants  
45  
46  
47  
48

49  
50  
51  
52  
53  
54  
55  
56  
57  
58 <sup>i</sup> under the Stratified Medicines Programme: Business Models Value Systems  
59  
60

1  
2  
3 were purposively sampled; each group chosen to reflect a particular demographic (age,  
4 socio-economic group (SEG), ethnicity) in order to gather a wide spectrum of views and  
5 enable comparisons across groups. Two 'patient' groups were also included, comprising  
6 people who had had an operation in the past two years requiring an overnight hospital  
7 stay, and people who currently have, or have had, either a serious or chronic illness, or  
8 disability. The latter group comprised people diagnosed with diabetes, cancer, heart  
9 disease, asthma and the genetic condition Marfan syndrome. A further group consisted  
10 of generally healthy ~~volunteers~~ people who had donated a biosample specifically for  
11 research purposes.  
12  
13  
14  
15  
16

17  
18 Before agreeing to take part, potential participants were given a participant information  
19 sheet telling them about the study (see supplementary data file Appendix I). Those that  
20 were interested were screened through a questionnaire containing demographic  
21 questions to assess their suitability for a particular focus group. These were held in  
22 'neutral' locations such as hotel conference rooms or church halls and facilitated by an  
23 experienced facilitator (CL). Before each group discussion, participants were sent a short  
24 information leaflet about the use of biosamples in biomedical research to provide some  
25 background context for the discussion and to prompt them to think about the key issues  
26 (see supplementary data file Appendix II). This information was written by a core team  
27 of authors drawn from across academia and industry, including patient representation. It  
28 was reviewed by three members of the patient organisation Genetic Alliance UK as well  
29 as the science communication charity Sense about Science to ensure readability and  
30 non-bias. Before focus group discussions began, participants were asked to sign a  
31 consent form. Each participant received ~~a £50 small honorarium~~ for taking part to cover  
32 time and travel costs. Focus groups lasted 90 minutes and digital audio recordings were  
33 taken.  
34  
35  
36  
37  
38  
39  
40  
41

42  
43 A detailed discussion guide was developed to explore participant views and preferences  
44 towards consent scope and process (see supplementary data file Appendix III). The main  
45 focus related to the use of biosamples surplus to diagnostic requirements following  
46 surgery or a medical procedure. Questions were informed by other empirical studies of  
47 consent in biobanking[16,22], developed by the authors, and addressed the topics  
48 described above. To enhance understanding around the different consent models,  
49 participants were given a sheet presenting three different scenarios, each of which  
50 elaborated on one of the three consent models chosen for discussion (see supplementary  
51 data file Appendix III, p.4IV). For each topic, discussion began by asking the group to  
52 consider the benefits and disadvantages of each particular approach. Once no new  
53 themes were emerging, each participant was asked to complete an accompanying  
54  
55  
56  
57  
58  
59  
60

1  
2  
3 anonymous questionnaire which asked them to select their preferred consent model. The  
4 discussion guide, scenario sheet and questionnaire were piloted at the first focus group  
5 which resulted in some minor amendments to wording.  
6

7  
8 Recordings were fully transcribed and transcriptions checked. The software package  
9 Nvivo version 9 (QSR International, Pty Ltd) was used to help organise the data for  
10 analysis. This comprised grouping responses to questions into broad thematic categories  
11 which were then refined through sub-codes. Coding of all 12 transcripts was conducted  
12 by CL. The first six transcripts to be coded were also independently coded by—and  
13 verified by a second researcher (SR). Codes were then compared to assess consistency  
14 of coding and ensure inter-rater reliability. Any discrepancies were discussed until  
15 consensus was reached. The remainder of the transcripts were then coded according to  
16 the agreed coding framework. —to ensure inter-rater reliability. Any discrepancies were  
17 discussed between the two researchers until consensus was reached.  
18  
19  
20  
21  
22

### 23 **Survey**

24  
25  
26 Once data analysis had been conducted on the focus group transcripts, the findings were  
27 used to inform development of a quantitative survey which was used to canvas public  
28 opinion on the issues of interest across a representative sample of the UK population  
29 (see supplementary data file Appendix IV). The survey was carried out by the market  
30 research company Research Now using their online panel community of UK residents. A  
31 stratified sampling method was used: quotas were set on sex, age, geographical  
32 location, SEG and ethnicity, in line with data provided by the Office of National Statistics  
33 (ONS) to ensure the sample was as representative of the UK population as possible.  
34 Within each category, a random sample was selected from the Research Now database  
35 containing 451,185 active respondents. We aimed to recruit 1,000 responders in total.  
36 The sample size required depends on the number of predictors, the expected effect size  
37 and the level of power. According to Miles and Shevlin [23], if we are expecting a small  
38 effect size, a sample size of 600 is considered adequate to achieve a high level of power  
39 of 0.8 (a benchmark suggested by Cohen [24]) for four predictors. As highlighted in  
40 Table 2 we can formulate at least four hypothesis, for example, people from a higher  
41 socio-economic group are more likely to donate biosamples than those from lower socio-  
42 economic group. With a sample size of 1,000, this study would provide highly reliable  
43 results. In order to reduce any on-line bias in our sample, 100 face-to-face interviews  
44 with non-internet users were conducted. An additional 'boost' sample of 100 people (not  
45 included in the main sample analysis) was also conducted with people from three  
46 minority ethnic groups ('Black', 'Chinese', 'S. Asian') so that we could conduct sub-group  
47 analysis between the groups.  
48  
49  
50  
51  
52  
53  
54  
55  
56  
57  
58  
59  
60

The survey questions were developed by the authors and piloted with 60 members of Research Now's online panel community who were from low SEG's. Members of the pilot group were then invited to take part in a subsequent telephone interview asking about the survey. Interviews were conducted with 25 pilot survey responders. Questions focused on question clarity, survey length and whether responders felt the survey to be neutral. Some minor amendments to wording were made in light of the responses. The main survey was then conducted in September 2012. Surveys recorded online took, on average, 17 minutes to complete and each responder received a small payment (around £2) from Research Now.

Survey data were organised and analysed using SPSS statistical software version 20 (Chicago, IL: SPSS Inc; 2011). Initial univariate descriptive statistics were obtained for the entire study. Pearson Chi-square was used to examine demographic factors associated with willingness to donate and preference for different consent models. Those associations that were found to be significant ( $p \leq 0.05$ ) were then entered into a multiple logistic regression to explore the predictivity of these variables. Before running the model, we tested for multicollinearity among the independent variables. No multicollinearity issues were found.

## RESULTS

### Study populations

Participant characteristics are detailed in Table 2.

Table 2: Participant characteristics

| Characteristic              | Focus group<br>N=81 | Survey<br>N=1110 |
|-----------------------------|---------------------|------------------|
| <b>Gender</b>               |                     |                  |
| Male                        | 33; 41%             | 504; 45%         |
| Female                      | 48; 59%             | 606; 55%         |
| <b>Age</b>                  |                     |                  |
| 18-24                       | 13; 16%             | 135; 12%         |
| 25-34                       | 18; 22%             | 184; 17%         |
| 35-44                       | 19; 23%             | 198; 18%         |
| 45-54                       | 10; 12%             | 184; 17%         |
| 55-64                       | 16; 20%             | 176; 16%         |
| 65+                         | 5; 6%               | 233; 21%         |
| <b>Socio-economic group</b> |                     |                  |
| A                           | 9; 11%              | 41; 4%           |
| B                           | 22; 27%             | 215; 19%         |
| C1                          | 24; 30%             | 311; 28%         |
| C2                          | 14; 17%             | 233; 21%         |
| D                           | 6; 7%               | 145; 13%         |
| E                           | 6; 7%               | 165; 15%         |
| <b>Region</b>               |                     |                  |
| East of England             | 7; 7%               | 92; 8%           |

|                       |         |          |
|-----------------------|---------|----------|
| East Midlands         | -       | 57; 5%   |
| London                | 18; 22% | 213; 19% |
| North East            | -       | 40; 4%   |
| North West            | -       | 121; 11% |
| Northern Ireland      | -       | 30; 3%   |
| Scotland              | 14; 17% | 76; 7%   |
| South East            | 14; 17% | 165; 15% |
| South West            | -       | 81; 7%   |
| Wales                 | -       | 51; 5%   |
| West Midlands         | 14; 17% | 94; 8%   |
| Yorkshire/Humberlands | 14; 17% | 90; 8%   |

**Ethnicity**

|                            |         |           |
|----------------------------|---------|-----------|
| White or White British     | 54; 67% | 1057; 95% |
| Mixed race                 | 1; 1%   | 7; 1%     |
| Asian or Asian British     | 10; 12% | 18; 2%    |
| Black or Black British     | 9; 11%  | 19; 2%    |
| Chinese or Chinese British | 7; 9%   | 2; 0%     |
| Other ethnic group         | 0; 0%   | 4; 0%     |
| Prefer not to say          | 0; 0%   | 3; 0%     |

**Religion**

|                   |  |          |
|-------------------|--|----------|
| Christianity      |  | 677; 61% |
| Islam             |  | 13; 1%   |
| Hinduism          |  | 6; 1%    |
| Sikhism           |  | 0; 0%    |
| Judaism           |  | 6; 1%    |
| Buddhism          |  | 11; 1%   |
| Other religion    |  | 15; 1%   |
| No religion       |  | 370; 33% |
| Prefer not to say |  | 12; 1%   |

**Religiosity**

|                      |  |          |
|----------------------|--|----------|
| Not at all religious |  | 234; 32% |
| Moderately religious |  | 422; 58% |
| Very religious       |  | 64; 9%   |
| Prefer not to say    |  | 8; 1%    |

**Education**

|                                                      |         |          |
|------------------------------------------------------|---------|----------|
| No formal qualification                              | 15; 19% | 70; 6%   |
| GCSE, O level, Scottish Standard Grade or equivalent | 19; 23% | 264; 24% |
| GCE, A-level, Scottish Higher or similar             | 17; 21% | 214; 19% |
| Vocational (BTEC/NVQ/Diploma)                        | -       | 230; 21% |
| Degree level or above                                | 30; 37% | 317; 29% |
| Prefer not to say                                    | -       | 15; 1%   |

**Self reported knowledge of medical research process**

|                |  |          |
|----------------|--|----------|
| No knowledge   |  | 463; 42% |
| Some knowledge |  | 603; 54% |
| Good knowledge |  | 44; 4%   |

**Have you been affected by a disability or illness?**

|     |  |          |
|-----|--|----------|
| Yes |  | 399; 36% |
| No  |  | 711; 64% |

**Has a close family member been affected by a disability or illness?**

|     |  |          |
|-----|--|----------|
| Yes |  | 767; 69% |
| No  |  | 343; 31% |

### Have you had blood or tissue removed during a medical procedure?

|            |          |
|------------|----------|
| Yes        | 446; 40% |
| No         | 553; 50% |
| Don't know | 111; 10% |

### Have you ever been asked to donate blood or tissue for medical research?

|            |          |
|------------|----------|
| Yes        | 182; 16% |
| No         | 904; 81% |
| Don't know | 24; 2%   |

### If so, did you agree to donate?

|            |          |
|------------|----------|
| Yes        | 155; 85% |
| No         | 23; 13%  |
| Don't know | 4; 2%    |

Note: percentages may not add up to 100 due to rounding.

### Focus groups

One hundred and eighty-two members of the public who were approached were eligible to participate (i.e. they fitted the criteria for a particular focus group) and 81 people agreed to participate (45% participation rate; 48 women, 33 men). There were seven participants in each focus group apart from the 18-25 age group and high SEG group (eight participants in each); serious/chronic illness group and healthy volunteers group (six participants in each) and the pilot group (five participants).

### Survey

Four thousand six hundred and seven people were invited to take part in the survey; 2014 did not respond, 860 began completing the survey but did not finish, 102 did not qualify to continue (e.g. they were under 18 years old), 521 qualified for the survey but the quota was full and 1110 completed the questionnaire (28% response rate excluding those who did not qualify and where the quota was full). This response rate is comparable to similar studies on this topic[16]. Our participant quotas closely, though not exactly, matched our targets based on the UK population data as provided by the ONS. For this reason we carried out both weighted and un-weighted analyses. There was no difference in the conclusions we reached by either method. In this paper we present the un-weighted results (weighted results can be found at supplementary data file Appendix V†).

### Importance of asking for consent

The majority of survey ~~and focus group~~ participants believed that obtaining consent for the use of residual biosamples was either extremely important (55%) or important (25%). Only 4% selected 'not at all important'. Focus group participants also saw the consent process as important and cited reasons including: Reasons as to why consent



~~was important, as cited by focus group participants, included~~ that it was "polite", "respectful" and "morally correct" to ask permission; that it enabled people to feel they had made a contribution and an active choice; that it provided control, in particular for those people that might not want their biosamples to be used, for example for religious reasons; that taking without asking was akin to theft; and that it was important in order to maintain trust between patients and doctors.

*"It then doesn't allow them to take liberties or advantage of the fact that you're out cold having an operation and someone says 'Oh we need a bit of that'."* Male, patient – had operation in past 2 years.

A small minority did not feel that consent was important, the main reasons being that they did not want the tissue back, that once it was removed it no longer 'belonged to them', and that the tissue would just go to waste otherwise.

Survey participants were asked what would be their preferred method of consenting to donate leftover biosamples for research use. The majority (65%) wanted to do so face-to-face with a health professional; 15% wanted to complete a form and return it by post. This issue was not specifically addressed with focus group participants due to time constraints.

### **Preference for 'opt-in' or 'opt-out' consent**

Participants were asked whether they preferred an opt-in or opt-out model of consent for donating residual biosamples. The results of the survey showed that opt-in consent was preferred by over half of the participants (55%), 28% preferred opt-out, 14% had no preference and 4% selected 'don't know'. Participants who were significantly more likely to prefer opt-in consent were: from a low SEG (E) (79.8% vs. 64.1%,  $X^2=11.13(1)$ ,  $p=0.001$ ); over 65 years (75.1% vs. 64%,  $X^2=7.68(1)$ ,  $p=0.006$ ); had a religious affiliation (68.8% vs. 61.2%,  $X^2=4.84(1)$ ,  $p=0.028$ ); and had an education level of GCSE or lower (71.1% vs. 63.9%,  $X^2=3.89(1)$ ,  $p=0.048$ ). The strongest significant predictor for preferring opt-in consent was being from a low SEG (E) (OR=2.22, 95% CI 1.41-3.57,  $p=0.001$ ) followed by having a religious affiliation (OR=1.36, 95% CI 1.01-1.81,  $p=0.04$ ) (Table 3).

Table 3: Multiple logistic regression of participant preferences for consent models

| <b>Participant characteristic</b> | <b>Coefficient</b> | <b>95% CI</b> | <b>Odds ratio</b> | <b>p value</b> |
|-----------------------------------|--------------------|---------------|-------------------|----------------|
| Preference for opt-in consent     |                    |               |                   |                |
| Socio-economic group              | 0.806              | 1.41, 3.57    | 2.22              | 0.001          |
| Religion                          | 0.304              | 1.01, 1.81    | 1.36              | 0.04           |
| Preference for consent every time |                    |               |                   |                |
| Religion                          | 0.72               | 1.05, 4.00    | 2.04              | 0.036          |



|                                       |      |            |      |        |
|---------------------------------------|------|------------|------|--------|
| Age                                   | 0.47 | 1.07, 2.41 | 1.60 | 0.023  |
| Preference for specific consent       |      |            |      |        |
| Opt-in                                | 1.52 | 3.30, 6.35 | 4.58 | <0.001 |
| Ethnicity                             | 1.08 | 1.23, 7.14 | 2.94 | 0.015  |
| Preference for generic consent        |      |            |      |        |
| Opt-out                               | 1.52 | 3.13, 6.67 | 4.55 | <0.001 |
| Religion                              | 0.04 | 1.08, 2.72 | 1.56 | 0.021  |
| Knowledge of medical research process | 0.44 | 1.06, 2.28 | 1.56 | 0.024  |

Demographic items were excluded from this table if none was statistically significant. All variables were entered into the models as categorical variables.

CI: Confidence Interval.

Focus group participants preferred opt-out consent ( $n=46$ ; 57%) over opt-in consent ( $n=29$ ; 36%), with 6 participants (7%) unsure, after in-depth discussion around the benefits and disadvantages of each approach. The main benefit of opt-out consent cited by participants was that more biosamples would be available and consequently spur research. Other reasons included: that it would be less costly administratively; that it maximised the value of left over biosamples; that patients wouldn't have to consider it every time they were having an operation or blood test; that those that did not want to donate still had the opportunity to opt-out; and that it would 'normalise' donating leftover biosamples which would be a positive step.

*"It would an incentive for society if everyone knew that this is what happens routinely, but you can choose not to be involved. It would be more like 'that's normal'."* Male, aged 18-24 group

Those that preferred the opt-in approach cited the following reasons as to why: an active choice whereby participants had to act on a decision to take part was preferable to a passive choice whereby consent was assumed; it enabled people to have more control over their biosamples; it was truly 'informed consent' in the context of donating surplus samples for research (rather than as part of a clinical trial; clinical trials were outside the scope of the study) and hence more ethically acceptable; it enabled people to feel that they were making a positive contribution and would prevent the problem of vulnerable groups not being aware they were automatically 'opted-in'.

*"There are going to be members of the public who are not going to always be able to consider rationally themselves what it actually means."* Female, healthy volunteer

Whilst the majority of focus group participants overall preferred opt-out consent, the results were different for the three minority ethnic groups ("Black", "S. Asian", "Chinese"), where opt-in consent was favoured by the majority.

### **Consent once for life or consent every time**

1  
2  
3 The most prevalent system in current use for donating new biosamples that are surplus  
4 to clinical requirements in the UK is the opt-in approach, with potential donors being  
5 asked for consent every time a procedure is performed that may result in a biosample  
6 becoming available for research. (The law allows for the use of diagnostic archives for  
7 research without consent as long as certain criteria are met). Participants were therefore  
8 asked to consider variations on this model and state whether they preferred: (1) consent  
9 once for life, covering all subsequent biosamples, until or unless the donor decides to  
10 withdraw consent; (2) consent every time samples surplus to diagnostic requirements  
11 may become available, or (3) consent at certain points in life. Consent every time (43%)  
12 was preferred by the majority of survey participants, followed by consent at certain  
13 points (27%) and consent once for life, e.g. at aged 18, (21%). Seven percent had no  
14 preference and 2% didn't know. Groups who were significantly more likely to prefer  
15 consent every time compared to consent once for life were: under 55 years (70.3% vs.  
16 60.9%;  $X^2=5.88(1)$ ,  $p=0.015$ ); had no knowledge of the research process (72.3% vs.  
17 63.4%;  $X^2=5.77(1)$ ,  $p=0.016$ ); or were either not at all or moderately religious (70.2%  
18 vs. 51.3%;  $X^2=5.1(1)$ ,  $p=0.024$ ). When entered into the regression analysis, the  
19 strongest significant predictor for preferring consent every time was being not at all or  
20 moderately religious (OR=2.04; 95% CI 1.05-4.00,  $p=0.036$ ) followed by being under  
21 55 years (OR=1.60; 95% CI 1.07-2.41,  $p=0.023$ ) (Table 3).

22  
23 Unlike survey responders, focus group participants favoured consent once for life ( $n=35$ ;  
24 43%) followed by consent every time samples surplus to diagnostic requirements may  
25 become available ( $n=27$ ; 33%) and consent at certain points ( $n=16$ ; 20%) with three  
26 choosing don't know (4%). Like opt-out consent, consent once for life was seen to be  
27 better as it was "quicker" and "easier" administratively and prevented researchers from  
28 "losing out". Consent provided most control for participants as you would "know the  
29 specific purpose of it", particularly if the sample was considered to be sensitive e.g.  
30 eggs; allowed "no room for error"; and enabled people to change their mind easily.

31  
32  
33  
34  
35  
36  
37  
38  
39  
40  
41  
42  
43  
44  
45  
46  
47  
48  
49  
50  
51  
52  
53  
54  
55  
56  
57  
58  
59  
60  
*"You may feel differently [depending on] what tissue is being donated and for what  
purpose the research is being carried out."* Female, aged 18-24 group

Some participants had concerns about how consent preferences (e.g. what types of  
research they were willing to donate a biosample for), would follow them across the  
healthcare system if a 'consent once for life' model was adopted. Consent at certain  
points was seen by some as a good middle ground as patients would still have some  
control, but would not have to go through the consent process every time they had a  
medical procedure. Examples of consent at certain points included every "five or ten

years", or at the beginning of particular episodes of care such as pregnancy or cancer treatment.

### **Models of consent for research use of biosamples**

Survey participants were presented with four consent models (Table 1), and asked whether they would consider consenting residual biosamples to each of them, providing the research had been approved by a research ethics committee (described as a committee usually made up of doctors, scientist, patients and the general public which ensure any research allowed to be done is for the benefit of patients). Eighty percent would agree to specific consent – once only; 77% would consent to specific consent – for every new study; 71% would agree to tiered consent; and 67% of participants would agree to generic consent. When asked which model they preferred, specific consent - for every new study, was the first choice amongst those who had a preference (30% of participants overall), followed by generic consent and specific consent- once only, jointly second (both 18%), and lastly tiered consent (14%). Sixteen percent had no preference and 6% didn't know.

After collapsing the two specific consent models together (specific consent - for every new study and specific consent – once only), those participants who preferred specific consent were significantly more likely to: have a religious affiliation (63.9% vs. 48.9%,  $X^2=16.88(1)$ ;  $p<0.001$ ); live in the North East or Scotland (60.9% vs. 42.7%,  $X^2=10.23(1)$ ,  $p=0.001$ ); be over 65 years (67.1% vs. 57.1%,  $X^2=5.31(1)$ ,  $p=0.021$ ); and be of a non-'White' ethnicity (68.9% vs. 58%,  $X^2=4.17(1)$ ,  $p=0.041$ ). Using the boost sample we found that 'Black' participants were significantly more likely to prefer specific consent models compared with 'White' participants (75.6% vs. 58%,  $X^2=4.31(1)$ ,  $p=0.038$ ). Those people who preferred opt-in consent were also more likely to prefer specific consent models (71.1% vs. 35.3%,  $X^2=91.72(1)$ ,  $p<0.001$ ). The strongest significant predictor for preferring specific consent was preferring opt-in consent (OR=4.58, 95% CI 3.30-6.35,  $p<0.001$ ) followed by being of non-'White' ethnicity (OR=2.94, 95% CI 1.23-7.14,  $p=0.015$ ) (Table 3).

We also looked at who was most likely to prefer generic consent, the least restrictive of the proposed consent models. Those that preferred generic consent were significantly more likely to: have no religious affiliation (51.1% vs. 36.1%,  $X^2=15.97(1)$ ,  $p<0.001$ ); have some or good knowledge of the medical research process (26.1% vs. 18.3%,  $X^2=6.79(1)$ ,  $p=0.009$ ); be male (26.8% vs. 19.9%,  $X^2=5.40(1)$ ,  $p=0.02$ ); and be from a higher SEG group (A-D) (24.3% vs. 15.1%,  $X^2=4.66(1)$ ,  $p=0.031$ ). They were also significantly more likely to prefer opt-out consent (64.7% vs. 28.9%,  $X^2=91.72(1)$ ,  $p<0.001$ ). The strongest significant predictor for preferring generic consent was

1  
2  
3 preferring opt-out consent (OR=4.55, 95% CI 3.13-6.67,  $p<0.001$ ) followed by having  
4 no religious affiliation (OR=1.56, 95% CI 1.08-2.72,  $p=0.021$ ) and some or good  
5 knowledge of the medical research process (OR=1.56, 95% CI 1.06-2.28,  $p=0.024$ )  
6 (Table 3).  
7  
8

9  
10 Focus group preferences differed from those of survey responders with generic and  
11 tiered consent being equally popular ( $n=36$ ; 44% and  $n=35$ ; 43% respectively). Specific  
12 consent – once only, was least popular ( $n=6$ ; 7%) (this was the only specific consent  
13 model given to participants). Four participants (5%) didn't know. Generic consent was  
14 valued as it provides most "flexibility for researchers"; reduces the likelihood residual  
15 biosamples will go to waste; is more straightforward to put in place; is "simpler to  
16 understand"; and enables biosamples to be used for more than "one specific thing".  
17  
18

19  
20  
21 *"It's better not to restrict the possible use of the sample because by restricting it you're*  
22 *increasing the chance that it'll go to waste. You want the highest probability that*  
23 *something good will come from it."* Male, patient – affected by a condition  
24

25  
26 It was also the consent model favoured by all participants who were affected by an  
27 illness or disability.  
28

29  
30 Tiered consent was ~~also~~ valued because it provided more control over donated  
31 biosamples than generic consent, allowing people to opt-out of certain types of research,  
32 and therefore provided "clarity and peace of mind". All but one participant in the 'Black'  
33 focus group and all participants who had donated biosamples as healthy volunteers  
34 preferred tiered consent. Whilst specific consent was seen to provide the most control  
35 and enabled participants to have "some understanding of what it might be used for",  
36 concerns raised were that it "can't be used for anything else", "could be wasted" and  
37 would require a time-consuming explanation from health professionals.  
38  
39

40  
41  
42  
43 In both the survey and focus groups, the donation of potentially sensitive biosamples  
44 produced a preference for specific consent. In the survey, a quarter (25%) preferred  
45 specific consent – for every new study, 22% preferred specific consent – once only, 12%  
46 preferred generic consent and 9% preferred tiered consent. Nineteen percent had no  
47 preference and 13% didn't know. When discussing donation of eggs, one woman  
48 commented:  
49  
50

51  
52  
53 *"People could reproduce a child or whatever and it's about the personal-ness of what's*  
54 *been taken from you. So if it's a bit of blood, yeah take it, I mean you just cut yourself*  
55 *and blood is gone, but if it's something that's quite personal you only have every now*  
56 *and again, that needs to be guarded."* Female, 'Black' ethnicity group  
57  
58  
59  
60

1  
2  
3  
4 We asked survey participants whether they would like to be kept up-to-date with  
5 research going on at a particular hospital or biobank to which they had donated a  
6 biosample. Eighty-five percent said they would be interested; the most popular methods  
7 to receive updates were via a website (27%), email (27%) or letter (22%).  
8  
9

## 10 11 **DISCUSSION**

12  
13  
14 This study contributes further to our understanding of the UK public's views and  
15 preferences towards consent for the use of biosamples in medical research. In summary,  
16 we have found that: 1) the consenting process was perceived as important in order to  
17 maintain trust between patients and health professionals and respect patient autonomy;  
18 2) survey participants exhibited a desire to retain active choice and control when  
19 donating biosamples and over the uses to which their biosamples might be put, and 3)  
20 these results differ from those reported during focus group discussions, where  
21 preference was for less restrictive consent models that are likely to increase availability  
22 of biosamples. These differences might be accounted for by the fact that focus group  
23 participants were given more background information about the use of residual  
24 biosamples in research and had time to consider the benefits and disadvantages of the  
25 different approaches. These interventions may have allayed any anxieties participants  
26 had about relinquishing control of their biosamples and seem to have encouraged  
27 participants to choose approaches that maximised biosample access to researchers,  
28 highlighting the importance and potential impact of education on influencing public  
29 perception in this area.  
30  
31  
32  
33  
34  
35  
36  
37

38 The preference for opt-in consent identified in the survey is consistent with the results of  
39 other studies in this area[3,15,16]. One reason for this preference may be that it  
40 matches the current system for organ donation for transplant in the UK. It was also  
41 perceived as being truly informed consent by some participants (although it is worth  
42 noting that it is the information provided to potential donors that guarantees consent is  
43 informed rather than the consent mechanism). Nevertheless, the sizeable number of  
44 survey responders who preferred opt-out consent (27%) coupled with the preference for  
45 opt-out amongst focus group participants (57%) does suggest that there may be  
46 broader support than previously believed for this approach. This point is also supported  
47 by the finding that fewer than half of survey participants wanted to be consented every  
48 time a sample was taken and nearly 30% preferred consent at certain points. Alternate,  
49 more streamlined approaches to consenting should therefore be considered and  
50 evaluated. Interestingly, our results showed that preference for opt-out consent was  
51 associated with being younger (under 65 years), from a higher SEG and a higher  
52  
53  
54  
55  
56  
57  
58  
59  
60

1  
2  
3 education level. These demographic groups may be more trusting of medical institutions  
4 to use residual biosamples appropriately, or perhaps feel empowered to be able to opt-  
5 out if so desired, for example, online. Similar findings have been reported in relation to  
6 organ donation; a study by Gimbel et al. found an association between cadaveric  
7 donation rate and percentage of the population enrolled in third-tier education[25].  
8 Internet access has also been found to correlate with increased organ donation[26].  
9  
10

11  
12 Concerning consent models for research use of biosamples, the majority of people (69%)  
13 were willing to donate biosamples via the least restrictive model, generic consent. A  
14 study conducted in Sweden found a similar percentage of the general public were happy  
15 to agree to generic consent (67%), whereby surrogate decisions were performed by a  
16 research ethics committee[27]. Other national studies have found the acceptability of  
17 generic consent amongst the general public and in particular patients to be higher,  
18 between 79%-95%[4,28-31]. Nevertheless, our survey findings suggest that willingness  
19 to donate increased where greater choice and control over research participation is  
20 retained, although the difference between those who were willing to agree to generic  
21 compared to specific was only 13%. Similarly, when survey responders were asked  
22 about their preferred approach, their preference was also for specific consent for every  
23 new study that might be conducted using their biosample. This may indicate a general  
24 interest in how samples are being used. This notion is supported by the high number of  
25 people who wanted ongoing contact about the research leading from their donation.  
26 Moreover, they may have not considered the practicalities of being asked to consent  
27 every time their sample is used, and the high level of recontact they might receive from  
28 research teams. Nevertheless, it is important to take note of the fact that more tailored  
29 forms of consent represent an attractive approach to many people. While specific  
30 consent may be practical for individual research projects, this restriction would make  
31 biobanking challenging, as biobanks exist to facilitate access to samples for a wide  
32 variety of approved research projects without the need for additional consent. It may be  
33 that as more sophisticated biosample tracking and management systems are adopted,  
34 resources could become available to support more interactive forms of consent, and  
35 more biobanks could offer tiered consent, for example. Further public dialogue and  
36 information about the use of the samples may also provide the same assurances for  
37 people that arise from specific consent, as highlighted by the preference for less  
38 restrictive consent models amongst focus group participants.  
39  
40  
41  
42  
43  
44  
45  
46  
47  
48  
49  
50  
51

52  
53 Evidence from other empirical studies looking at preferences for consent models is  
54 mixed. UK studies focusing on donations purely for research by 'healthy volunteers' to  
55 biobanks (i.e. not donating residual biosamples) have identified a preference for specific  
56 consent,[19,32] as did a study conducted in the USA that also focused on healthy  
57  
58  
59  
60



1  
2  
3 volunteers[15]. In a pan-European survey, the majority of the UK public also preferred  
4 specific consent for every new study, although the percentage that did was slightly lower  
5 than the overall European average (65% compared to 67%)[33]. It was, however,  
6 higher than in Denmark and Finland, where the percentage of people who wanted to be  
7 re-contacted for every new study was lower at 51% and 54% respectively. These  
8 countries were also found to have very few concerns about the collection of personal  
9 information by biobanks and had high levels of trust in ethics committees. Other  
10 empirical work conducted in the USA, Canada, and Sweden and Spain has shown that  
11 public preference is for generic consent[3,16,18,34,35]. These findings highlight the  
12 divergence of opinion on this issue, in particular in different contexts and with different  
13 information provision, although the difficulty of comparing across studies with different  
14 methodologies and backgrounds must also be taken into account. Notably, where  
15 participants had some or good knowledge of the research process and where there was  
16 in-depth discussion (i.e. during focus groups), participants were more likely to prefer  
17 generic consent, a finding that has also been identified elsewhere in the literature[36]  
18 and supports the need for information and education if increasing the acceptability of  
19 generic consent is deemed desirable. Focus group participants affected by an illness or  
20 disability were also found to prefer generic consent, and is likely to reflect the fact that  
21 they have greater interests at stake[37]. Preference for specific consent was ~~also~~ found  
22 to be associated with being over 65 years and from a non-'White' ethnicity, findings  
23 which resonate with other studies[3,38,39]. Consent documentation and written  
24 information targeted specifically at these particular groups may also help alleviate any  
25 specific concerns these groups may have.  
26  
27  
28  
29  
30  
31  
32  
33  
34  
35  
36

37 This research into current public attitudes regarding biosample donation in the UK  
38 provides valuable guidance for biobanking governance. Whilst generic consent is the  
39 model largely endorsed by regulators and funders in the UK[9,11], the evidence from  
40 this study suggests that there is a need to address the potential concerns that some  
41 people may have about the minimal information and lack of control provided through  
42 this model. Education and opportunity for discussion may be one way to allay concerns,  
43 as demonstrated through focus groups. Keeping donors informed of current research  
44 taking place at the hospital or research institutions to which they donated also appears  
45 to be desirable and is likely to be both motivating and promote public trust and  
46 confidence in the research process, a finding reported elsewhere[40]. The opportunity  
47 for face-to-face discussion with an appropriately trained healthcare professional at the  
48 time of donation may also allay any potential concerns, and is indeed the approach  
49 usually taken in the UK at present. This approach has been found to yield high  
50 acceptance rates amongst patients of well over 90%[41-43].  
51  
52  
53  
54  
55  
56  
57  
58  
59  
60

### Strengths and Limitations

This was a mixed methods study to explore public views and preferences towards consent for biosample donation. Integrating quantitative and qualitative approaches is valuable in exploratory research as it can strengthen the inferences made through triangulation and allow for a more nuanced understanding of the topic[44]. This study presented participants with a series of hypothetical questions about their preferences and willingness to donate residual biosamples for medical research. By presenting questions as 'real life' scenarios, we hoped to make the questions as realistic as possible. However, as with any hypothetical scenario, the findings may not necessarily correlate with actual behaviour.

The questions for both the focus groups and the survey were piloted to ensure they were clear and understandable and were not biased towards any particular viewpoint. Nevertheless, many of the issues covered were complex, particularly around the meaning of the different consent models which may have contributed to the dropout rate. Focus groups participants were not presented with the option of 'specific consent – for every new study' (they were only given 'specific consent – once only'). This may have been an attractive option for some given that a concern raised was biosamples being wasted. However, given that the key reasons participants' valued generic consent were because it provided most flexibility to researchers and was most straightforward to administer, this seems unlikely. In addition, given time and resource constraints we were unable to explore whether 'stronger' consent models would have been preferable for organisations that donors trusted less. This is an area that would be worth exploring further in future research. Participants who did complete the survey may have done so because of strong feelings about the issues raised and this may have skewed the results; however, every effort was made to ensure that the results were as representative of the UK population as possible. The focus groups and survey were conducted in English and so the findings may not be representative of non-English speaking members of the general public. Future research might target these particular groups.

### CONCLUSION

There is a general willingness amongst the UK population to donate biosamples for medical research. Our research suggests that there is a preference amongst the UK public for more information on the uses and outcomes of research, and ongoing choice and control over donated biosamples. Our study also supports the premise that increased knowledge and opportunity for discussion is associated with acceptance of less restrictive consent models.



1  
2  
3  
4  
5 **Acknowledgements** We would like to thank Lisa Bennett, Sarah Dickson, Catherine  
6 Elliott, James Ironside and Chris Womack and for their helpful comments on this paper;  
7 Sarah Dickson, Jim Elliott and Neil Formstone for their contribution to the design of the  
8 study; and Samantha Reeve and Zheng Lei for help with data analysis.  
9

10  
11 **Funding statement** This work was supported by a grant from the Technology Strategy  
12 Board through the Stratified Medicines Competition grant number 101021, direct  
13 financial contributions by AstraZeneca and resource in kind by AstraZeneca,  
14 GlaxoSmithKline and Lab 21.  
15  
16

17  
18 **Competing interests:** Lesley Stubbins is an employee of GlaxoSmithKline. Mark  
19 Robertson is an employee of AstraZeneca.  
20

21  
22 **Contributors:** J.C. conceived the study. All authors contributed to the study design. In  
23 addition to all the authors, Sarah Dickson, Jim Elliott and the late Neil Formstone also  
24 contributed towards the design of the study and development of the focus group and  
25 survey questions. C.L. facilitated the focus groups. Focus group recruitment was  
26 conducted by the company The Focus Group; the survey was conducted through the  
27 market research company Research Now. C.L. conducted data analysis and  
28 interpretation with the help of Samantha Reeve and Zheng Lei. The initial draft of the  
29 manuscript was prepared by C.L and then circulated repeatedly among the authors for  
30 critical revision. All authors approved the final manuscript.  
31  
32  
33  
34

35  
36 **Ethical approval** This study was approved by the Ethics Review Board of the University  
37 of Manchester, reference 11459.  
38

39  
40 **Data sharing statement** Transcripts from the focus groups and full results of the  
41 survey are available from CL at [celine@geneticalliance.org.uk](mailto:celine@geneticalliance.org.uk). Supplementary material is  
42 also available at [www.geneticalliance.org.uk/projects/stratum\\_docs.htm](http://www.geneticalliance.org.uk/projects/stratum_docs.htm)  
43  
44  
45  
46

## 47 REFERENCES

- 48  
49  
50 1. Oosterhuis JW, Coebergh JW, van Veen EB. Tumour banks: well-guarded treasures in  
51 the interest of patients. *Nature reviews. Cancer* 2003;**3**:73-7.  
52  
53 2. Elger BS, Caplan AL. Consent and anonymization in research involving biobanks:  
54 differing terms and norms present serious barriers to an international framework.  
55 *EMBO reports* 2006;**7**:661-6.  
56  
57  
58  
59  
60

- 1  
2  
3 3. Murphy J, Scott JCGC, Kaufman D, et al. Public Perspectives on Informed Consent for  
4 Biobanking. *American Journal of Public Health* 2009;**99**:2128-34.
- 5  
6 4. Wendler D. One-time general consent for research on biological samples. *BMJ*  
7 2006;**332**:544-7.
- 8  
9 5. Allen J, McNamara B. Reconsidering the value of consent in biobank research.  
10 *Bioethics* 2011;**25**:155-66.
- 11  
12 6. Department of Health. The Human Tissue Act. 2004  
13 [http://www.dh.gov.uk/prod\\_consum\\_dh/groups/dh\\_digitalassets/@dh/@en/docu](http://www.dh.gov.uk/prod_consum_dh/groups/dh_digitalassets/@dh/@en/documents/digitalasset/dh_4103686.pdf)  
14 [ments/digitalasset/dh\\_4103686.pdf](http://www.dh.gov.uk/prod_consum_dh/groups/dh_digitalassets/@dh/@en/documents/digitalasset/dh_4103686.pdf) Accessed 11 November 2011.
- 15  
16 7. Hansson MG, Dillner J, Bartram CR, et al. Should donors be allowed to give broad  
17 consent to future biobank research? *Lancet Oncol* 2006;**7**:266-9.
- 18  
19 8. Hoeyer K. Donors perceptions of consent to and feedback from biobank research:  
20 Time to acknowledge diversity? *Public Health Genomics* 2010;**13**:345-52.
- 21  
22 9. Human Tissue Authority. Consent exemptions from the Human Tissue Act 2004  
23 <http://www.hta.gov.uk/licensingandinspections/consentexemptions.cfm> Accessed  
24 26 February 2013.
- 25  
26 10. Integrated Research Application System. Guidance document for researchers.  
27 [https://www.myresearchproject.org.uk/Help/Help%20Documents/PdfDocuments/](https://www.myresearchproject.org.uk/Help/Help%20Documents/PdfDocuments/researchtissuebank.pdf)  
28 [researchtissuebank.pdf](https://www.myresearchproject.org.uk/Help/Help%20Documents/PdfDocuments/researchtissuebank.pdf) Accessed 25 February 2013.
- 29  
30 11. Medical Research Council (MRC) and National Cancer Research Institute (NCRI). UK  
31 Funders' Vision for Human Tissue Resources, September 2011.
- 32  
33 12. Nuffield Council on Bioethics. Human bodies: donations for medicine and research.  
34 2011 [http://www.nuffieldbioethics.org/sites/default/files/Donation\\_full\\_report.pdf](http://www.nuffieldbioethics.org/sites/default/files/Donation_full_report.pdf)  
35 Accessed 26 February 2013.
- 36  
37 13. Petrini C. "Broad" consent, exceptions to consent and the question of using biological  
38 samples for research purposes different from the initial collection purpose. *Social*  
39 *Science and Medicine* 2010;**70**:217-20.
- 40  
41 14. Tupasela A, Sihvo S, Snell K, et al. Attitudes towards biomedical use of tissue sample  
42 collections, consent, and biobanks among Finns. *Scandinavian Journal of Public*  
43 *Health* 2010;**38**:46-52.
- 44  
45 15. Kaufman D, Bollinger J, Dvoskin R, et al. Preferences for opt-in and opt-out  
46 enrollment and consent models in biobank research: a national survey of  
47 Veterans Administration patients. *Genetics in medicine : official journal of the*  
48 *American College of Medical Genetics* 2012;**14**:787-94.
- 49  
50 16. Simon CM, L'Heureux J, Murray JC, et al. Active choice but not too active: Public  
51 perspectives on biobank consent models. *Genetics in Medicine* 2011;**13**:821-31.
- 52  
53  
54  
55  
56  
57  
58  
59  
60

17. Willison DJ, Swinton M, Schwartz L, et al. Alternatives to project-specific consent for access to personal information for health research: insights from a public dialogue. *BMC Med Ethics* 2008;**9**:18.
18. Kettis-Lindblad Å, Ring L, Viberth E, et al. Perceptions of potential donors in the Swedish public towards information and consent procedures in relation to use of human tissue samples in biobanks: A population-based study. *Scandinavian Journal of Public Health* 2007;**35**:148-56.
19. Shickle D, Hapgood R, Carlisle J, et al. Public attitudes to participating in UK Biobank. A public consultation on issues relating to feedback, consent, withdrawal and access: School of Health and Related research (SchARR). University of Sheffield, 2003.
20. Haddow G, Cunningham-Burley S, Murray L. Can the governance of a population genetic data bank effect recruitment? Evidence from the public consultation of Generation Scotland Public Underst Sci 2011117-29.
21. Start RD, Brown W, Bryant RJ, et al. Ownership and uses of human tissue: Does the Nuffield bioethics report accord with opinion of surgical inpatients? *BMJ* 1996;**313**:1366-68.
22. Ipsos MORI Social Research Institute. Human Tissue Authority General Public Survey. 2010 [http://www.hta.gov.uk/db/documents/2007-09-10\\_Ipsos\\_MORI\\_general\\_public\\_qual\\_and\\_quant\\_report\\_final\\_200709101952.pdf](http://www.hta.gov.uk/db/documents/2007-09-10_Ipsos_MORI_general_public_qual_and_quant_report_final_200709101952.pdf) Accessed 26 February 2013.
23. Miles JN, Shevlin M. *Applying regression and correlation: a guide for students and researchers*. London: Sage, 2001.
24. Cohen J. *Statistical power analysis for the behavioural sciences* 2nd ed. New York: Academic Press, 1988.
25. Gimbel RW, Strosberg MA, Lehrman SE, et al. Presumed consent and other predictors of cadaveric organ donation in Europe. *Prog Transplant* 2003;**13**:17-23.
26. Rithalia A, McDaid C, Suekarran S, et al. Impact of presumed consent for organ donation on donation rates: a systematic review. *BMJ* 2009;**338**:a3162.
27. Hoeyer K, Olofsson B-O, Mjörndal T, et al. Informed consent and biobanks: a population-based study of attitudes towards tissue donation for genetic research. *Scandinavian Journal of Public Health* 2004;**32**:224-29.
28. McQuillan GM, Porter KS, Agelli M, et al. Consent for genetic research in a general population: the NHANES experience. *Genetics in medicine : official journal of the American College of Medical Genetics* 2003;**5**:35-42.

- 1  
2  
3 29. Hoeyer K, Olofsson BO, Mjorndal T, et al. The ethics of research using biobanks:  
4 Reason to question the importance attributed to informed consent. Archives of  
5 Internal Medicine 2005;**165**:97-100.  
6  
7 30. Stegmayr B, Asplund K. Genetic research on blood samples stored for years in  
8 biobanks. Most people are willing to provide informed consent. Lakartidningen  
9 2003;**100**:618-20.  
10  
11 31. Malone T, Catalano PJ, O'Dwyer PJ, et al. High rate of consent to bank biologic  
12 samples for future research: the Eastern Cooperative Oncology Group experience.  
13 Journal of the National Cancer Institute 2002;**94**:769-71.  
14  
15 32. Gaskell G, Gottweis H, Starkbaum J, et al. Publics and biobanks: Pan-European  
16 diversity and the challenge of responsible innovation. Eur J Hum Genet 2012.  
17  
18 33. TNS Opinion & Social on request by the European Commission. Eurobarometer 73.1:  
19 Biotechnology. 2010  
20 [http://ec.europa.eu/public\\_opinion/archives/ebs/ebs\\_341\\_en.pdf](http://ec.europa.eu/public_opinion/archives/ebs/ebs_341_en.pdf) Accessed 15  
21 May 2013.  
22  
23 34. Master Z, Claudio JO, Rachul C, et al. Cancer patient perceptions on the ethical and  
24 legal issues related to biobanking. BMC Med Genomics 2013;**6**:8.  
25  
26 35. Valle-Mansilla JI, Ruiz-Canela M, Sulmasy DP. Patients' attitudes to informed consent  
27 for genomic research with donated samples. Cancer investigation 2010;**28**:726-  
28 34.  
29  
30 36. Gaskell G, Gottweis H. Biobanks need publicity. Nature 2011;**471**:159-60.  
31  
32 37. Tupasela A, Snell K. National interests and international collaboration: tensions and  
33 ambiguity among Finns towards usages of tissue samples. New Genetics and  
34 Society 2012;**31**:424-41.  
35  
36 38. Nilstun T, Hermeren G. Human Tissue Samples and Ethics. Medicine, Health Care  
37 and Philosophy 2006;**9**:81-86.  
38  
39 39. Ma Y, Kong X, Dai H, et al. Attitudes towards biosample donation in andrology  
40 patients. International journal of andrology 2012;**35**:170-5.  
41  
42 40. Haddow G, Cunningham-Burley S, Bruce A, et al. Generation Scotland: consulting  
43 publics and specialists at an early stage in a genetic database's development.  
44 Critical Public Health 2008;**18**:139-49.  
45  
46 41. Jack AL, Womack C. Why surgical patients do not donate tissue for commercial  
47 research: review of records. BMJ 2003;**327**:262.  
48  
49 42. Bryant RJ, Harrison RF, Start RD, et al. Ownership and uses of human tissue: what  
50 are the opinions of surgical in-patients? Journal of clinical pathology  
51 2008;**61**:322-26.  
52  
53 43. Wheeler J, Agarwal M, Sugden J, et al. Experiences from the front-line routine  
54 consenting of surplus surgically removed tissue: without investment by the  
55  
56  
57  
58  
59  
60

1  
2  
3 National Health Service fully informed consent for all is not available. *J Clin Pathol*  
4 2007;**60**:351-4.  
5

- 6 44. Teddlie C, Tashakkori A. *Foundations of Mixed Methods Research: Integrating*  
7 *Quantitative and Qualitative Approaches in the Social and Behavioral Sciences.*  
8 Thousand Oaks, California: Sage Publications, Inc., 2009.  
9  
10  
11  
12  
13  
14  
15  
16  
17  
18  
19  
20  
21  
22  
23  
24  
25  
26  
27  
28  
29  
30  
31  
32  
33  
34  
35  
36  
37  
38  
39  
40  
41  
42  
43  
44  
45  
46  
47  
48  
49  
50  
51  
52  
53  
54  
55  
56  
57  
58  
59  
60



**Genetic Alliance UK**  
Supporting. Campaigning. Uniting.

MANCHESTER  
1824

The University  
of Manchester

## Appendix 1

### Attitudes Towards Donating Human Tissue Samples for Research Participant Information Sheet

We would like to invite you to take part in a research study to help us understand what people think about donating human biological samples, (such as blood, saliva, types of blood tissues such as lung tissue, liver tissue) or tissue (e.g. lung tissue, saliva), or post mortem tissue, for medical research. These samples could be left over from a surgical procedure or they may be donated specifically for research purposes. Currently, we know very little about what people think about this issue. Please take the time to read the following information to help you decide whether you would like to take part.

**Who will conduct this research?** The research is part of the STRATUM project, a project set up to try to increase the effectiveness of tissue sample provision in the UK. It is being conducted with the help of a national charity, Genetic Alliance UK that represents over 150 patient organisations. The Focus Group are a reputable research company helping us to recruit members of the public. This study has received ethics approval from Manchester University.

**What is the aim of this research?** The aim is to understand what people think about donating human tissue samples for medical research.

**Why have I been chosen?** As a member of the public, your views are important. Your views will help us understand people's opinions and ensure that the donation of biological samples for medical research is carried out in a way that reflects people's wishes.

**What would I be asked to do if I took part?** We are inviting you to attend a group discussion to discuss your opinions about donating tissue samples for medical research. Don't worry if you feel you don't know a lot about this topic because discussions will be led by a trained moderator. We have provided some basic information along with this sheet that gives you some background about the topic. There are no right or wrong views; everyone's opinions will be equally valid.

Page | 1

Genetic Alliance UK: Unit 4D, Leroy House, 436 Essex Road, London, N1 3QP  
020 7704 3141 [contactus@geneticalliance.org.uk](mailto:contactus@geneticalliance.org.uk) [www.geneticalliance.org.uk](http://www.geneticalliance.org.uk)

Charity registered in England and Wales (no. 1114195) and in Scotland (no. SC039299)  
For peer review only - <http://bmjopen.bmj.com/site/about/guidelines.xhtml>  
Company limited by guarantee, registration no: 05772999



## Genetic Alliance UK

Supporting. Campaigning. Uniting.

**What happens to the data collected?** The information collected from these discussions will be used to write a report which will be used to

influence National policy. The findings will also be used to publish academic papers in journals.

**How is confidentiality maintained?** Discussions will be digitally recorded so that we can get an accurate account of what was said. However, when these are typed up, all comments will be anonymous and your name will not appear anywhere on the document. The documents will be kept secure on an encrypted hard drive and backed up on an encrypted memory stick which will be kept in a locked office. These documents and the audio files will be kept for 5 years and then destroyed. This information will not be passed on to any other third party.

**What happens if I do not want to take part or if I change my mind?** It is up to you whether or not to take part. If you do decide to take part you will be asked to sign a consent form saying that you have agreed to take part and have the conversation recorded. If you decide to take part you are still free to withdraw at any time without giving a reason and without detriment to yourself.

**Will I be paid for taking part?** As a thank you for taking part you will be given £50 which will be given at the end of the discussion.

**What is the duration of the research?** There will be between 6-8 people in the group which will last approximately 1.5 hours.

**Where will the research be conducted?**

**What are the benefits from me taking part?** There is no direct benefit to yourself from taking part, but your views will help to shape future policy.

**Who will be running the group?** The person running the focus group is Celine Lewis, who is a researcher with Genetic Alliance UK. If you have any concerns or questions about taking part in this research before the group then please contact Celine on 0207 704 3141. If you have agreed to take part and then find nearer the time you are no longer able to make the group then please contact the person who recruited you directly so that you can be replaced.

**What if something goes wrong?** In the unlikely event that you want to make a complaint about the conduct of the research, or would like help or advice following the discussion, you can contact the head of the project, Julie Corfield:

Email: [juliecorfield@areteva.com](mailto:juliecorfield@areteva.com)

Tel: 0115 812 0008

Many thanks,

**Celine Lewis**

Page | 2

Genetic Alliance UK: Unit 4D, Leroy House, 436 Essex Road, London, N1 3QP  
020 7704 3141 [contactus@geneticalliance.org.uk](mailto:contactus@geneticalliance.org.uk) [www.geneticalliance.org.uk](http://www.geneticalliance.org.uk)

Charity registered in England and Wales (no. 1114195) and in Scotland (no. SC039299)  
For peer review only - <http://bmjopen.bmj.com/site/about/guidelines.xhtml>  
Company limited by guarantee, registration no: 05772999





**Genetic Alliance UK**  
Supporting. Campaigning. Uniting.

## Appendix II

# Donating biological samples for medical research

### Introduction

Medical research is necessary to improve our understanding of what keeps us healthy and how diseases start and progress. It also means scientists can develop new and improved treatments.

Body fluid (such as blood, saliva, urine) and human tissue (such as fat, cancer tumours or muscle) are often used in scientific and medical research. Types of research that need body fluid and human tissue include:

- Looking at how the body works to fight disease.
- Testing new treatments for conditions such as heart disease and diabetes.
- Developing tests for different types of cancer.
- Researching how certain types of cells could be used to treat conditions like Parkinson's disease, Alzheimer's disease and multiple sclerosis.

Many of the tests and treatments used today resulted from people donating body fluid and human tissue (often called 'samples') for research years ago.

### How are human samples collected?

There are a number of ways that human samples can be collected:

- Samples may be left over after surgery. Tissue may be removed during surgery so tests can be done on the tissue or to stop the diseased tissue spreading to other parts of the body. After any necessary tests have been done on the tissue, there may be some left over. This left over tissue may be destroyed or used for medical research.
- Samples may be left over from a medical test such as a blood test.
- Samples might be donated specifically for medical research.
- A person may give permission (known as 'consent' or 'authorisation') for a sample to be taken and used for research in the event of their death.
- A person's family may give permission for the person's organs, which would have been donated for transplant, to be used for research if they are not suitable for transplant or a suitable recipient is not available.

The collection and use of samples is tightly governed by law in the UK. The removal of samples from a person is always done with the donor's permission, and any research first has to be approved by a research ethics committee. This committee is usually made up of doctors, scientist, patients and the general public, and ensures any research allowed to be done is for the benefit of patients. In specific circumstances the law allows samples that have already been collected to be used for another purpose, as long as the donor cannot be identified and the use has been approved by an ethics committee.

### What is done with the sample once it is collected?

Samples may be collected by a researcher and used immediately, or they may be collected for research purposes and kept. This may be in a researcher's laboratory or it may be in a storage place specifically for samples, known as a biobank.





## Genetic Alliance UK

Supporting. Campaigning. Uniting.

The biobank keeps the samples so they can be used by scientists for research. In other words, biobanks are a little like libraries of samples, and only a research team can use them if they have the appropriate approval. A biobank has to follow regulations and have a licence, granted by the Human Tissue Authority (a UK Government organisation), to be able to store human tissue samples for research.

These systems ensure that any research respects the privacy of the people who donated the samples and that the research is of benefit to society. In many cases, it can be very important to have a patient's medical records along with their sample so that scientists can make sense of the results of their research. Any identifying information, such as names or addresses, is removed and not included with the sample.

### **How long is the biological sample kept?**

A sample may be used all at once. However, it is often the case that it won't all be used in one go. Therefore the sample may be stored and used over many years so that research can be done on it well into the future.

### **What are the benefits from donating biological samples to medical research?**

The person donating the sample is unlikely to benefit directly from the research, as it can take many years for the research on samples to produce new treatments or cures for diseases. Nevertheless, donors often see a benefit from knowing that they have personally helped medical research.

## **Genetic Alliance UK 2012**

### **The following information was used during the making of this leaflet:**

"Donating samples for research; Patient information" – Central England Haemato-Oncology Research Biobank

"Donating your tissue for research"- Human Tissue Authority

"Active choice but not too active: Public perspectives on biobank consent models" Simon et al. 2011; Genetics in Medicine

## Appendix III

## Focus Group – Discussion Guide

**Introduction (5 minutes)**

*Thank them for coming*

*Aim of discussion – hear people’s views, there are no right or wrong opinions, disagreement OK*

*Participation voluntary*

*Confidentiality – all info anonymous, personal details will not be passed on to any third party*

*Get permission for recording to be taped – no names or identifying features used when typed up*

*Guidelines – talk one at a time; am interested in everyone’s views so will try and give everyone equal ‘airtime’; no wrong answers – be honest and open.*

*Turn mobile phones off*

*Go round room. Ask everyone to say their name and one of their favourite foods.*

**Research (30 minutes)**

On the information sheet you’ve been given, there is some general information about donating samples for research. Has everybody had a chance to read this information? (if not give participants a few minutes to read document). So, to summarise....*give a brief overview of information on the document.*

1. So to start off, does anyone have any questions about anything I’ve said so far?

So I’d like us to think now about the different types of samples someone might donate to medical research. Human biological samples can mean a variety of different things including body fluid such as blood, saliva and sperm, and human tissue such as fat, cancer tumours or muscle or even whole organs.

2. Do you think there are some types of samples which are more sensitive to give than others? Which ones? Why?

There are also various different ways that samples can be collected. They might be

- left over from routine procedures such as surgery;
- left over after a medical test such as a blood test;
- donated specifically for medical research, for example a cheek swab or an extra blood sample;
- donated after a person’s death;
- a person's organs e.g. heart or kidneys, which would have been donated for transplant, may be used for research if they are not suitable for transplant or a suitable recipient is not available. The relevant clinical data may also be included and reviewed after death.

3. I’d like us to go through each of these in turn and discuss whether you have concerns about any of these ways that samples might be collected and why. GO THROUGH AND PROBE EACH POINT SPECIFICALLY (AFTER GROUP DISCUSSION: ask participants to complete associated question on questionnaire)

4. Do you see donation of human samples for medical research and organ donation for transplant similarly or do you think they are different?

5. Thinking specifically about donating tissue or organs after one’s death, do you think if someone has indicated in writing that they are willing to donate these for research in the event of their death, their wishes can be overridden by their relatives?

1  
2  
3 Samples may be used for a variety of different types of research. This might include looking  
4 at how the body works to fight disease; testing new treatments for conditions such as heart  
5 disease and diabetes or developing ways of diagnosing earlier different types of cancer.  
6

- 7 6. Are there any types of research you would not be happy for your sample to be used  
8 for? Why?

9 (AFTER GROUP DISCUSSION: ask participants to complete associated question on  
10 questionnaire)  
11

12 There are many places where research is performed, such as universities, NHS, charities  
13 such as cancer research, government labs and pharmaceutical companies. These are all  
14 groups that do research & sometimes they collaborate with each other in order to make  
15 medical progress.  
16

- 17  
18 7. Do you have any concerns about any particular types of organisations using donated  
19 samples. Which if any, and why?

20  
21 (AFTER GROUP DISCUSSION: ask participants to complete associated question on  
22 questionnaire)  
23

- 24 8. What do you think about the organisations that conduct research on samples? Do  
25 you think they are generally doing a good thing for society? Do you have any  
26 concerns about what they do?  
27

- 28 9. Institutions such as the government and ethics review committees make decisions  
29 about what research can and can't be done on human samples. Ethics review  
30 committees are usually made up of different experts such as of doctors, scientists,  
31 ethics experts and patients Do you generally trust these types of institutions to make  
32 decisions about what research can and can't be done using human tissue samples?  
33  
34

### 35 **Consent (40 minutes)**

36  
37 I'd like to now talk about getting permission, also known as consent, to use a person's  
38 sample for medical research. Most of us have probably had blood taken at some point and  
39 some of us will have had an operation. If we have blood taken for a test, there might be  
40 some blood left over after the test has been done. Similarly, tissue may be removed during  
41 an operation and there may be some left over after any necessary tests have been done on  
42 the tissue. So you would not have any additional tissue taken just for research purposes  
43 unless you had specifically given permission for this at the time it was going to be taken. In  
44 most cases, it is just the leftover blood or tissue that you might agree to donate to medical  
45 research.  
46  
47

- 48 10. Thinking about leftover blood or tissue being used for medical research, do you think  
49 a person needs to be asked for their consent? FOR EACH RESPONSE: Why/why not?  
50 How important is this to you?  
51

- 52 11. What would you expect to happen to samples that are left over from clinical  
53 procedures?  
54

- 55 12. The majority of the time, tissue that is left over is destroyed. How do you feel about  
56 that?  
57

58 There are a number of different ways that a person could give their permission or consent  
59 for their sample to be used for medical research. I'd like us to think about some of these  
60 now and discuss what we like and what we dislike about these different types of consent.  
For peer review only - <http://bmjopen.bmj.com/site/about/guidelines.xhtml>

I'd like us to start by thinking about whether we prefer what is known as an **opt-in** system, or whether we prefer an **opt-out** system of sample donation.

Opt-in means that a person has to say that, after they turn 18, they are willing to and actively agree to donate their sample for research. This is how the current system for organ donation works in the UK.

The other approach is an opt-out approach. In this system, it is assumed that a person is happy, after they turn 18, for their sample to be used for research unless they specifically say otherwise. However, there is a mechanism in place for a person who is not willing to donate to opt out.

So, to start with, let's think about the first option, OPT-IN.

13. What do you think are the pros and cons about this approach? Why?

14. Thinking now about the OPT-OUT approach, what do you think are the pros and cons? Why?

15. Which do you prefer? How important is this to you? (AFTER GROUP DISCUSSION: ask participants to complete associated question on questionnaire)

The current system is an opt-in one, so I want us to think about this type of consent now. If you were going to be asked to donate any leftover blood or tissue for medical research there are two ways this could be done. You could be asked to give consent **every time** you have an operation or blood test, or you could give consent just **once for life for all your samples**, with the option of withdrawing at a later point if you wanted to.

16. Thinking about **consent every time**, what do you think are the advantages and disadvantages of this approach?

17. Thinking about **consent once for life**, what do you think are the advantages and disadvantages of this approach?

18. Can you think of any happy medium which might be better?

19. Which would you prefer? Why? How important is this to you? (AFTER GROUP DISCUSSION: ask participants to complete associated question on questionnaire)

20. If people gave consent just once, when and where do you think the best place would be to give consent?

21. If someone wanted to consent to donate their tissue or organs for medical research in the event of their death, do you think it should be obtained at the same time as consent for organ transplantation and recorded on the organ donor register?

In front of you, you have 3 different scenarios. In each one the story is essentially the same, however there are some slight differences and these are highlighted in bold. I'd like to discuss what you think of each of these in turn.

*Read all 3 scenarios out loud highlighting the key differences between the three. Then go back and discuss each one in turn.*

Scenario 1: Lisa is having surgery to remove a lump from her breast which the doctor is concerned may be cancerous. Before the surgery the surgeon explains that once the tissue is removed, they will take it to the laboratory to do tests on it to check what it is. The surgeon then explains that after these tests are done, there may be some tissue left over. He asks Lisa if she would like to donate this left over tissue for medical research. If it is not donated for medical research it will be destroyed. The surgeon doesn't know exactly what kinds of research the tissue might be used for, but it may be used to find better ways to diagnose, prevent and treat cancer. He also explains that before any research is done, it has to be approved by an independent ethics committee.

So, in this scenario:

- Lisa is asked to give consent once to donate the left over tissue for a range of future unknown uses
- Lisa is given some general information about the kind of research the tissue might be used for but nothing specific.
- This type of consent is known as GENERIC CONSENT

22. What do you think about this type of consent?

23. What do you **like** about this approach?

24. Do you have **any concerns** about this approach?

**Scenario 2:** Lisa is having surgery to remove a lump from her breast which the doctor is concerned may be cancerous. Before the surgery the surgeon explains that once the tissue is removed, they will take it to the laboratory to do tests on it to check what it is. The surgeon then explains that after these tests are done, there may be some tissue left over. He asks Lisa if she would like to donate this left over tissue for medical research. If it is not donated for medical research it will be destroyed. The surgeon doesn't know exactly what types of research the tissue might be used for, but it may be used to find better ways to diagnose, prevent and treat cancer. Lisa is asked to sign a consent form. The surgeon explains that **Lisa can indicate on the consent form whether there are any particular kinds of research which she doesn't want the tissue to be used for, for example research involving animals or research conducted outside the UK.** He also explains that before any research is done, it has to be approved by an independent ethics committee.

So, in this scenario:

- Lisa is asked to give consent once to donate the tissue for a range of future unknown uses;
- Lisa is given some general information about the kind of research the tissue might be used for;
- **Lisa can say if there are any particular kinds of research which she doesn't want the tissue to be used for.**
- This type of consent is known as TIERED CONSENT

25. What do you think about this type of consent?

26. What do you **like** about this approach?

27. Do you have any **concerns** about this approach?

Scenario 3: Lisa is having surgery to remove a lump from her breast which the doctor is concerned may be cancerous. Before the surgery the surgeon explains that once the tissue is removed, they will take it to the laboratory to do tests on it to check what it is. The surgeon then explains that after these tests are done, there may be some tissue left over. He asks Lisa if she would like to donate this left over tissue for medical research. If it is not

1  
2 donated for medical research it will be destroyed. The surgeon explains that **the hospital**  
3 **are currently involved in a study looking at the growth of tumours. He informs her**  
4 **that if she gives permission for the left over tissue to be used, it would only be for**  
5 **this particular study.** He also explains that the study has been approved by an  
6 independent ethics committee.  
7

8 So, in this scenario:

- 9
- 10 • **Lisa is only asked to give consent to a particular study and is given**  
11 **information about that study.**
  - 12 • This type of consent is known as SPECIFIC CONSENT

13 28. What do you think about this type of consent?

14 29. What do you **like** about this approach?

15 30. Do you have any **concerns** about this approach?

16  
17  
18  
19  
20  
21 31. In this exercise we have discussed three different types of consent. Which do you  
22 prefer and why? GO ROUND AND ASK PEOPLE (AFTER GROUP DISCUSSION: ask  
23 participants to complete associated question 6 & 7 on questionnaire)

24  
25 32. Generic consent is the most practical type of consent as it is the least costly to put in  
26 place. Researchers try their very best to honour donors' wishes, but in some cases  
27 where they cannot do this with confidence, instead of risking using a sample for  
28 something the donor feels strongly against, it won't be used at all. If your first choice  
29 wasn't generic consent, does this information change your preference? (AFTER  
30 GROUP DISCUSSION: ask participants to complete question 8.)

31  
32 33. So, we've discussed which type of consent you would like for left over samples.  
33 Would your preference be any different for samples that you might donate  
34 specifically for research, e.g. if you volunteered to take part in a study and had to  
35 give a saliva or blood sample?

36  
37 34. Would your preference be any different if you were donating what you might  
38 consider to be more sensitive samples e.g. genetic data, stem cells?

39  
40 35. If you decide to withdraw consent would you be happy for researchers to use the  
41 data that had already been generated up to that point using your sample?

42  
43 36. Do you think a central website where you can find out about general research that  
44 your sample might be used for would be useful and something you would use?  
45  
46  
47

### 48 Information (10 minutes)

49  
50 Researchers often need to have access to the donor's medical records in order to be able to  
51 meaningfully interpret the results of the scientific research. However, information, such as  
52 names or addresses are always removed and not included with the sample. This is so that  
53 the person who donated the sample cannot be identified by the scientist conducting the  
54 research or anyone analysing the results of the research. However, the sample may have a  
55 code so that someone not involved in the research can identify the individual if necessary.  
56

57 37. Would you be happy with your medical records being linked to your sample or would  
58 you have concerns? Why?  
59  
60

1  
2 38. Are there any types of information you would not want to be associated with your  
3 sample?  
4

5 Sometimes it can also be helpful for the researcher to have certain information about the  
6 lifestyle of the person who donated the sample, for example whether they smoked, drank  
7 alcohol, how often they exercised etc. This information might help them to better  
8 understand the particular condition they are investigating.  
9

10 39. Would you be happy for this information to be made available or would you have  
11 concerns about your lifestyle information being associated with your sample? Why?  
12  
13

#### 14 **Ownership of sample (5 minutes)**

15  
16 40. What significance do you attach to a biological sample once it has been removed  
17 from your body? Do you still see it as yours or part of you in some way? Are you  
18 owed money if a drug is developed using your sample?  
19  
20  
21  
22  
23  
24  
25  
26  
27  
28  
29  
30  
31  
32  
33  
34  
35  
36  
37  
38  
39  
40  
41  
42  
43  
44  
45  
46  
47  
48  
49  
50  
51  
52  
53  
54  
55  
56  
57  
58  
59  
60



## Appendix V

Survey looking at the publics' views on donating biological samples for medical research

*This survey was originally conducted online in September 2012 and hosted by the market research company Research Now.*

Q1. What age are you?

1. 18-24
2. 25-34
3. 35-44
4. 45-54
5. 55-64
6. 65+

Q2. Are you male or female?

1. Male
2. Female

Q3. What is the occupation of person who receives the highest income in your household?

1. Higher managerial/ professional/ administrative (e.g. established doctor, solicitor, board director in a large organisation (200+ employees, top level civil servant/public service employee)) **(A – Letters will be hidden)**
2. Intermediate managerial/ professional/ administrative (e.g. newly qualified (under 3 years) doctor, solicitor, board director small organisation, middle manager in large organisation, principle officer in civil service/local government) **(B)**
3. Supervisory or clerical level/ junior managerial/ professional/ administrative (e.g. office worker, student doctor, foreman with 25+ employees, salesperson, etc) **(C1)**
4. Student **(C1)**
5. Skilled manual worker (e.g. skilled bricklayer, carpenter, plumber, painter, bus/ ambulance driver, HGV driver, AA patrolman, pub/bar worker, etc) **(C2)**
6. Semi or unskilled manual work (e.g. manual workers, all apprentices to be skilled trades, caretaker, park keeper, non-HGV driver, shop assistant) **(D)**
7. Casual worker – not in permanent employment **(E)**
8. Housewife/househusband/ homemaker **(E)**
9. Retired and living on state pension **(E)**
10. Unemployed or not working due to long-term sickness **(E)**
11. Full-time carer of other household member **(E)**
98. Other (specify)

Q4. What region do you live in?



1. Channel Islands
2. East of England
3. East Midlands
4. London
5. North East
6. North West
7. Northern Ireland
8. Scotland
9. South East
10. South West
11. Wales
12. West Midlands
13. Yorkshire / Humberside
96. Not on Map

Q5. Please choose one option that best describes your ethnic group or background.

1. White or White British
2. Mixed race
3. Asian or Asian British (not Chinese)
4. Black or Black British
5. Chinese
6. Other ethnic group
96. Prefer not to say

Q6. Which religion do you most identify with?

1. Christianity
2. Islam
3. Hinduism
4. Sikhism
5. Judaism
6. Buddhism
7. Other religion
8. No religion
96. Prefer not to say

Q7. If you do have a religion you identify with, to what extent do you consider yourself religious?

1. Not at all religious
2. Moderately religious
3. Very religious
96. Prefer not to say

1  
2  
3  
4 Q8. Please indicate which, if any, is the highest educational or professional qualification you  
5 have obtained.  
6

- 7
- 8 1. No formal qualification
- 9 2. GCSE, O level, Scottish Standard Grade or equivalent
- 10 3. GCE, A-level, Scottish Higher or similar
- 11 4. Vocational (BTEC/NVQ/Diploma)
- 12 5. Degree level or above
- 13 96. Prefer not to say
- 14
- 15

16  
17 Q9. How would you describe your own level of knowledge about the medical research process  
18 including the use of human tissue samples?  
19

- 20 1. No knowledge
- 21 2. Some knowledge
- 22 3. Good knowledge
- 23
- 24

25  
26 Q10. Are you or have you ever been affected by a long-standing illness, disability or infirmity  
27 which has required continuous or frequent medical attention (e.g. cancer, diabetes, heart disease,  
28 asthma, a genetic condition)?  
29

- 30 1. Yes
- 31 2. No
- 32
- 33

34  
35 Q11. Has a close family member ever been affected by a long-standing illness, disability or  
36 infirmity which has required continuous or frequent medical attention (e.g. cancer, diabetes, heart  
37 disease, asthma, a genetic condition)?  
38

- 39 1. Yes
- 40 2. No
- 41
- 42

43  
44 Q12. Have you ever had blood or tissue removed during a medical or surgical procedure?  
45

- 46 1. Yes
- 47 2. No
- 48 97. Don't know
- 49

50  
51 Q13. Have you ever been asked to donate any blood or tissue for medical research?  
52

- 53 1. Yes
- 54 2. No
- 55 97. Don't know
- 56
- 57

58 **ASK IF CODED 1 AT Q13.**  
59  
60

1  
2  
3 Q14. Did you agree to donate?  
4

- 5 1. Yes  
6 2. No  
7  
8 97. Don't know  
9

10 **ASK IF CODED 2 AT Q14.**

11 Q14a. Please tell us a little bit about your reasons for choosing not to donate.

12 *There are no right or wrong answers – we're just interested in your honest opinion.*  
13

14  
15 This survey is being done to help us understand public opinion about human tissue samples donated  
16 by people for medical research.  
17

18  
19 Medical research is essential to improve our understanding of what keeps us healthy and how  
20 diseases start and progress. It also means scientists can develop new and improved treatments.  
21 Body fluid such as blood, saliva and urine, and human tissue such as cells, skin, fat or even whole  
22 organs (in the event of someone's death), are often used in scientific and medical research. Usually  
23 these are referred to as samples.  
24

25  
26 Types of research that need samples include:  
27

- 28  
29 • Looking at how the body works to fight disease.  
30 • Looking at why some people are more likely to develop certain diseases.  
31 • Developing tests to diagnose conditions like cancer or dementia earlier on.  
32 • Testing new treatments for conditions such as heart disease and diabetes.  
33 • Researching how certain types of cells could be used to treat conditions like Parkinson's  
34 disease and Alzheimer's disease.  
35  
36

37  
38 Many of the tests and treatments used today resulted from people donating samples for research  
39 previously. The removal of samples from a person is always done with the donor's permission.  
40 Samples that are donated for research are anonymised so that the researcher using the sample does  
41 not know who it came from. The types of research that are allowed to take place are highly  
42 regulated by both UK law and also by independent research ethics committees (usually made up of  
43 doctors, scientist, patients and the general public). These ensure any research allowed to be done is  
44 for the benefit of patients.  
45  
46

47  
48 *The next button will appear shortly. In the meantime take some time to read the information above  
49 as it relates to the remainder of the survey.*  
50

51 Q15. On a scale of 1 to 5 with 1 being Not At All Important and 5 being Extremely Important, how  
52 important do you think it is for people to donate samples for medical research?  
53

54  
55 **SCALE:**

- 56 1. Not at all important  
57 2.  
58  
59  
60

- 3.
- 4.
5. Extremely important
97. Don't know

Q16. Samples can be left over from surgery or a medical procedure, or they can be donated specifically for research. Left over samples that are not required for clinical diagnosis or donated for medical research are often destroyed.

In general, would you like to be asked to donate samples for medical research?

1. Definitely yes
2. Probably yes
3. Probably not
4. Definitely not
97. Don't know

#### RANDOMISE STATEMENTS

Q17. You are having a medical procedure to treat a health issue. Would you donate the following types of samples for medical research if they were left over (after necessary medical tests had been done) following the procedure?

#### SCALE:

1. Definitely yes
2. Probably yes
3. Probably not
4. Definitely not
97. Don't know

#### STATEMENTS:

1. Blood
2. Skin tissue
3. Fat
4. Cancerous tissue
5. Liver tissue
6. Bone or cartilage
7. Spare eggs not fertilised during IVF treatment (IVF is a process by which an egg is fertilised by a sperm outside the body and then transferred back into the body to establish a successful pregnancy) **ASK ONLY FEMALES**
8. Spare embryos (fertilised eggs) not transferred back into the body following IVF (IVF is a process by which an egg is fertilised by a sperm outside the body and then transferred back into the body to establish a successful pregnancy)

#### RANDOMISE STATEMENTS

1  
2  
3 Q18. You've gone to the hospital for an appointment and whilst you are in the waiting room the  
4 receptionist explains they are collecting samples for medical research. Would you agree to donate  
5 the following types of samples specifically for medical research, i.e. not as part of any medical  
6 procedure, put purely for the purposes of research?  
7

8  
9 Would you agree to donate the following types of samples specifically for medical research?  
10 Below are some definitions you might need to know in order to answer the questions.  
11

12  
13 *Local anaesthetic - "A type of painkilling medication that is used to numb areas of the body during*  
14 *surgical procedures. You stay awake when you have a local anaesthetic"*  
15

16  
17 *General anaesthetic - "A medication that causes loss of sensation. It is used to give pain relief during*  
18 *surgery. General anaesthetic makes you completely lose consciousness so that surgery can be carried*  
19 *out without causing any pain or discomfort. Most healthy people don't have any problems when*  
20 *having a general anaesthetic. However, as with most medical procedures, there is a small risk of*  
21 *long-term complications and, rarely, death."*  
22

23  
24 **SCALE:**

- 25 1. Definitely yes  
26 2. Probably yes  
27 3. Probably not  
28 4. Definitely not  
29 97. Don't know  
30  
31

32  
33  
34 **STATEMENTS:**

- 35 1. Saliva  
36 2. Urine  
37 3. Blood  
38 4. Tissue collected requiring a local anaesthetic (e.g. a skin cell scraping)  
39 5. Tissue collected requiring a general anaesthetic (e.g. a liver sample)  
40 6. Sperm **ASK ONLY MALES**  
41  
42  
43  
44

45 Q19. In the event of your death, would you be willing to donate the following for medical  
46 research?  
47

48 **SCALE:**

- 49 1. Definitely yes  
50 2. Probably yes  
51 3. Probably not  
52 4. Definitely not  
53 97. Don't know  
54  
55

56  
57 **STATEMENTS:**  
58  
59  
60

1. A small sample of the liver
2. A small sample of the brain
3. A whole liver
4. A whole brain

Q20. You are having surgery for a health issue which requires a general anaesthetic. The surgeon asks you whether you would be willing to consent to any additional tissue (i.e. tissue not needing to be removed as part of the health issue) being taken during the surgery for medical research. He assures you that any additional tissue taken would have no impact for you or your health and that no extra tissue would be removed without your consent.

A decision to consent or not to consent would be equally respected and would have no impact on the care you receive.

Would you be willing to donate the following types of samples for medical research?

*General anaesthetic - "A medication that causes loss of sensation. It is used to give pain relief during surgery. General anaesthetic makes you completely lose consciousness so that surgery can be carried out without causing any pain or discomfort. Most healthy people don't have any problems when having a general anaesthetic. However, as with most medical procedures, there is a small risk of long-term complications and, rarely, death."*

**SCALE:**

1. Definitely yes
2. Probably yes
3. Probably not
4. Definitely not
97. Don't know

**STATEMENTS:**

1. Samples taken from the same part of the body being operated on
2. Samples taken from an area close by
3. Samples involving an additional procedure e.g. taking bone marrow or a tissue sample whilst under the same general anaesthetic

**RANDOMISE STATEMENTS**

Q21. Samples may be used for lots of different types of research. The types of research that are allowed to take place are highly regulated by both UK law and also by research ethics committees. Would you be willing to donate samples for the following types of research?

*Research ethics committee - "A committee usually made up of doctors, scientist, patients and the general public. These ensure any research allowed to be done is for the benefit of patients."*

**SCALE:**

1. Definitely yes
2. Probably yes
3. Probably not
4. Definitely not
97. Don't know

**STATEMENTS:**

1. Understanding how our body fights disease
2. Understanding how our genetic makeup influences whether or not we will be affected by certain conditions
3. Testing new treatments
4. Research which involves using cells that come from embryos (*fertilised eggs*)
5. Research involving animals
6. Research conducted outside of the UK

**RANDOMISE ORDER OF STATEMENTS.**

Q22. There are many places where research is performed, such as universities, the NHS, medical research charities such as Cancer Research UK and Arthritis Research UK, pharmaceutical companies and diagnostic companies. These organisations work individually, and often in collaboration, to carry out research, to understand disease, develop tests for diseases and develop and test new treatments.

Would you be willing to donate samples to the following organisations to carry out approved medical research?

*Diagnostic companies - "A company which develops and manufactures medical tests to diagnose diseases"*

**SCALE:**

1. Definitely yes
2. Probably yes
3. Probably not
4. Definitely not
97. Don't know

**STATEMENTS**

1. NHS hospitals
2. Universities
3. Medical research charities
4. Pharmaceutical companies
5. Diagnostic companies

1  
2  
3  
4 Q23. Samples left over following surgery and once any necessary tests have been done, can be  
5 anonymised and used for medical research. On a scale of 1 to 5 with 1 being Not At All Important  
6 and 5 being Extremely Important, how important do you think it is that you are first asked for your  
7 permission (often known as 'consent') for any left over samples to be used for medical research?  
8 *Anonymised - i.e. identifying features such as names and addresses are removed*  
9  
10

11 **SCALE:**

- 12  
13 1. Not at all important  
14 2.  
15 3.  
16 4.  
17 5. Extremely important  
18  
19  
20

21 Q24. There are a number of different ways that a person could give consent for their left over  
22 samples to be used for medical research.  
23  
24

- 25 a) One way is an 'opt-in' system. Opt-in means that a person must specifically be asked for  
26 their permission before any leftover samples can be used in medical research.  
27  
28 b) The other way is an 'opt-out' system. In this system, it is assumed that a person is happy,  
29 after they turn 18 years old, for any leftover samples to be used for medical research unless they  
30 specifically say otherwise.  
31  
32

33 Which of the two systems to donating leftover samples do you prefer?  
34  
35

- 36 1. Opt-in  
37 2. Opt-out  
38 3. No preference  
39 97. Don't know  
40  
41  
42  
43

44 Q25. The current system in the UK is an opt-in system. That means you have to say whether you  
45 want any leftover samples to be donated for medical research. If you were going to be asked to  
46 donate any leftover samples for medical research there are three ways this could be done.  
47  
48

- 49 a) You could be asked to give consent for left over samples to be used for research **every time**  
50 you have samples removed, or  
51  
52 b) you could be asked just **once for life** for any future left over samples to be used for medical  
53 research (with the option of withdrawing your permission at any later point if you wanted to),  
54  
55 c) you could be **asked at certain points** during your life, for example every 10 years by your GP,  
56 or at the start of treatment for a particular condition or health issue.  
57  
58  
59  
60



1  
2  
3 Which of these three approaches do you prefer?  
4  
5

- 6 1. Consent every time
- 7 2. Consent once for life
- 8 3. Consent at certain points
- 9 4. No preference
- 10 97. Don't know
- 11
- 12
- 13

14 Q26. If you were going to be asked to donate left over samples for medical research every time  
15 you had a medical procedure, would you rather this was discussed with you by a health  
16 professional before the medical procedure or afterwards?  
17

- 18 1. Before
- 19 2. After
- 20 3. No preference
- 21 97. Don't know
- 22
- 23
- 24
- 25
- 26

27 Q27. If we adopted a consent once for life system in the UK for adults (i.e. aged 18 years and  
28 over), when would you prefer to be asked about consenting left over samples for medical  
29 research? *Choose up to 3 options.*  
30

- 31 1. When registering at a GP surgery
- 32 2. During a routine GP appointment
- 33 3. When applying for a driving license
- 34 4. When applying for a passport
- 35 5. The first time I visit the hospital
- 36 6. The first time I have a medical procedure (e.g. blood test or surgery)
- 37 98. Other (please specify)
- 38
- 39
- 40
- 41
- 42

43 Q28. What would be your preferred way to register your consent to donate left over samples for  
44 medical research?  
45

- 46 1. Face to face with a health professional
- 47 2. Letter
- 48 3. Email
- 49 4. Telephone
- 50 5. Via a website
- 51 6. Completing a form (from a GP surgery, post office, library or other community centre) and  
52 returning it by post
- 53 98. Other (please specify)
- 54 97. Don't know
- 55
- 56
- 57
- 58
- 59
- 60

1  
2  
3  
4 Q29. If you later decided you didn't want your samples to be used for medical research, what  
5 would be your preferred way to withdraw that consent?  
6  
7

- 8 1. Face to face with a health professional
- 9 2. Letter
- 10 3. Email
- 11 4. Telephone
- 12 5. Via a website
- 13 6. Completing a form (from a GP surgery, post office, library or other community centre) and  
14 returning it by post
- 15 98. Other (please specify)
- 16 97. Don't know
- 17
- 18
- 19
- 20

21  
22 Q30. Imagine you have agreed to donate a sample for medical research. There are a number of  
23 ways you can give consent for that particular sample to be used:  
24

#### 25 STATEMENTS

- 26
- 27
- 28 1. You can give consent once for your sample to be used in any future research that has been  
29 approved by a research ethics committee. This type of consent is called Generic Consent.
- 30

31 Thinking about Generic Consent, if this was the type of consent you were asked to give, how  
32 likely would you be to donate samples for medical research?  
33

34  
35 *Research ethics committee. "A committee usually made up of doctors, scientist, patients and  
36 the general public. These ensure any research allowed to be done is for the benefit of  
37 patients."*  
38

- 39
- 40
- 41
- 42 2. You can give consent once for your sample to be used in any future research that has been  
43 approved by a research ethics committee but with the option of saying whether there are  
44 certain types of research you don't want your sample to be used for. This type of consent is  
45 called Tiered Consent.  
46

47 Thinking about Tiered Consent, if this was the type of consent you were asked to give, how  
48 likely would you be to donate samples for medical research?  
49

50  
51 *Research ethics committee. "A committee usually made up of doctors, scientist, patients and  
52 the general public. These ensure any research allowed to be done is for the benefit of  
53 patients."*  
54  
55  
56  
57  
58  
59  
60

- 1  
2  
3 3. You can give consent once for the sample to be used for a specific study that you have been  
4 told about, which has been approved by a research ethics committee. The sample will not be  
5 used for any other research other than the particular study you have given consent for. Any  
6 leftover tissue at the end of the study may be destroyed. This type of consent is called  
7 Specific Consent – once only.  
8

9  
10 Thinking about Specific Consent – once only, if this was the type of consent you were asked  
11 to give, how likely would you be to donate samples for medical research?  
12

13  
14 *Research ethics committee. "A committee usually made up of doctors, scientist, patients and*  
15 *the general public. These ensure any research allowed to be done is for the benefit of*  
16 *patients."*  
17

- 18  
19  
20 4. **Lastly**, you can give consent every time for the sample to be used for a specific study that  
21 you have been told about, which has been approved by a research ethics committee. With  
22 this type of consent you would then be contacted and asked for your consent for every new  
23 study in which your sample might be used. This type of consent is called Consent for every  
24 new study.  
25

26  
27 Thinking about Consent for every new study if this was the type of consent you were asked  
28 to give, how likely would you be to donate samples for medical research?  
29

30  
31 *Research ethics committee. "A committee usually made up of doctors, scientist, patients and*  
32 *the general public. These ensure any research allowed to be done is for the benefit of*  
33 *patients."*  
34

35 **SCALE:**

- 36 1. Definitely yes  
37 2. Probably yes  
38 3. Probably not  
39 4. Definitely not  
40  
41 97. Don't know  
42

43  
44  
45 Q31. Which of these four types of consent do you prefer? Please rank them in order of preference.  
46 Put 1 for your first preference; 2 for your second; 3 for your third preference and 4 for your last  
47 preference. If you don't have any preference, and like all 4 equally, tick the 'No preference' you  
48 don't know then tick ' Don't know'  
49

- 50  
51 1. Generic consent  
52 2. Tiered consent  
53 3. Specific consent – once only  
54 4. Consent for every new study  
55 5. No preference  
56  
57 97. Don't know  
58  
59  
60

**ASK TO THOSE PEOPLE WHO DID NOT RANK GENERIC CONSENT AS FIRST CHOICE**

Q32. Generic consent is the most practical type of consent as it is the least costly to put in place. Researchers try their very best to honour donors' wishes, but in some cases where it is too costly to put Tiered or Specific Consent in place, instead of risking using a sample for something the donor feels strongly against, it won't be used at all. If Tiered or Specific consent was not available, what would you do?

1. I would agree to give generic consent
2. I would rather my sample was not used at all
97. Don't know

Q33. Some people feel there are certain types of samples that are more sensitive to donate, for example sperm or left over eggs. If there was a sample that you considered to be sensitive, but were still willing to donate for medical research, which of the four types of consent would you prefer to give?

1. Generic consent
2. Tiered consent
3. Specific consent – once only
4. Consent for every new study
5. No preference
97. Don't know

Q34. Researchers often need to have access to the donor's medical records to be able to interpret the results of their scientific research. However, information such as names or addresses are always removed and are not included with the sample. This is so that the person who donated the sample cannot be identified by the scientist conducting the research or anyone analysing the results of the research. However, the sample may have a code so that someone not involved in the research can identify the individual if necessary, for example, if there was a serious health issue the donor should be aware of.

Would you be willing to have your anonymised medical records linked to your sample?

1. Definitely yes
2. Probably yes
3. Probably not
4. Definitely not
97. Don't know

Q35. Sometimes it can also be helpful for the researcher to have certain information about the lifestyle of the person who donated the sample, for example whether they smoke, drink alcohol, how often they exercise etc. This information might help them to better understand the particular

1  
2  
3 condition they are investigating. Would you be willing to have your anonymised lifestyle  
4 information linked to your sample?  
5

- 6  
7 1. Definitely yes  
8 2. Probably yes  
9 3. Probably not  
10 4. Definitely not  
11 97. Don't know  
12

13  
14  
15 Q36. For some people, it would be interesting to find out what type of medical research is going  
16 on. How would you like to get information on medical research including research on a particular  
17 condition that might use your sample?  
18

- 19  
20 1. Website  
21 2. Newsletter  
22 3. Email  
23 4. Letter  
24 5. Would not be interested in additional information  
25  
26

27  
28 Q37. If you were considering donating whole organs for medical research in the event of your  
29 death, are there any particular organs you would **not** feel comfortable donating?  
30 Please choose all that apply.  
31

- 32  
33 1. Brain  
34 2. Eyes  
35 3. Heart  
36 4. Kidneys  
37 5. Liver  
38 6. Lungs  
39 7. I would **not** donate any of my organs for medical research  
40 8. None of the above apply as I would be happy to donate either all my organs or whole body  
41 for research  
42  
43 98. Other organs I would not donate (please state)  
44  
45  
46  
47

48  
49 Q38. Sometimes, organs donated for transplant can't be transplanted because for some reason  
50 they are not suitable. However, these organs can still be very useful to researchers. Would you be  
51 willing to donate organs you had intended for transplant for medical research instead if the organ  
52 was not suitable?  
53

- 54  
55 1. Yes, I would donate an organ for research if it was not suitable for transplant  
56 2. No, if they can't be used for transplant I would prefer they were not used at all  
57 3. I would not agree to donate an organ for transplant  
58  
59  
60

1  
2  
3 97. Don't know  
4

5 Q39. If someone wanted to donate their tissue or organs for medical research in the event of  
6 their death, how do you think they should be able to provide their consent to do this?  
7

- 8  
9 1. It should be obtained at the same time as consent for organ transplantation and recorded on  
10 the organ donor register  
11 2. It should be discussed at a GP appointment and recorded in the patients' notes  
12 3. It should be discussed at a hospital and recorded in the patients' notes  
13 98. Other (please specify)  
14 97. Don't know  
15  
16  
17

18  
19 Q40. Someone has indicated in writing that they are willing to donate tissue or organs for medical  
20 research in the event of their death. After the donor's death the relatives decide they disagree with  
21 the donor's wishes. Do you think the relatives should be allowed to override the donor's wishes?  
22

- 23  
24 1. Yes  
25 2. No  
26 97. Don't know  
27  
28  
29

30 Q41. If you have any particular views you would like to share with us about the topics raised in this  
31 questionnaire please feel free to write them here:  
32  
33  
34  
35  
36  
37  
38  
39  
40  
41  
42  
43  
44  
45  
46  
47  
48  
49  
50  
51  
52  
53  
54  
55  
56  
57  
58  
59  
60

## Appendix VI

## Results of survey –unweighted and weighted

| Demographic Data              |            |     |          |     |
|-------------------------------|------------|-----|----------|-----|
|                               | Unweighted |     | Weighted |     |
|                               | N          | %   | N        | %   |
| <b>Sex</b>                    |            |     |          |     |
| Male                          | 504        | 45% | 544      | 49% |
| Female                        | 606        | 55% | 566      | 51% |
| <b>Socioeconomic Group</b>    |            |     |          |     |
| A                             | 41         | 4%  | 44       | 4%  |
| B                             | 215        | 19% | 244      | 22% |
| C1                            | 311        | 28% | 322      | 29% |
| C2                            | 233        | 21% | 233      | 21% |
| D                             | 145        | 13% | 178      | 16% |
| E                             | 165        | 15% | 89       | 8%  |
| <b>Age</b>                    |            |     |          |     |
| 18–24                         | 135        | 12% | 133      | 12% |
| 25–34                         | 184        | 17% | 189      | 17% |
| 35–44                         | 198        | 18% | 200      | 18% |
| 45–54                         | 184        | 17% | 189      | 17% |
| 55–64                         | 176        | 16% | 167      | 15% |
| 65+                           | 233        | 21% | 233      | 21% |
| <b>Occupation</b>             |            |     |          |     |
| Higher managerial             | 41         | 4%  | 44       | 4%  |
| Intermediate managerial       | 215        | 19% | 244      | 22% |
| Supervisory or clerical level | 288        | 26% | 299      | 27% |
| Student                       | 23         | 2%  | 23       | 2%  |
| Skilled manual worker         | 233        | 21% | 233      | 21% |
| Semi or unskilled manual work | 145        | 13% | 178      | 16% |
| Casual worker                 | 12         | 1%  | 6        | 1%  |
| Housewife                     | 9          | 1%  | 5        | 0%  |
| Retired                       | 81         | 7%  | 45       | 4%  |
| Unemployed                    | 46         | 4%  | 24       | 2%  |
| Carer                         | 17         | 2%  | 9        | 1%  |
| Other                         | 0          | 0%  | 0        | 0%  |
| <b>Region</b>                 |            |     |          |     |
| Channel Islands               | 0          | 0%  | 0        | 0%  |
| East of England               | 92         | 8%  | 100      | 9%  |
| East Midlands                 | 57         | 5%  | 78       | 7%  |

## Appendix VI

## Results of survey –unweighted and weighted

|                                                           |      |     |      |     |
|-----------------------------------------------------------|------|-----|------|-----|
| London                                                    | 213  | 19% | 144  | 13% |
| North East                                                | 40   | 4%  | 44   | 4%  |
| North West                                                | 121  | 11% | 122  | 11% |
| Northern Ireland                                          | 30   | 3%  | 33   | 3%  |
| Scotland                                                  | 76   | 7%  | 89   | 8%  |
| South East                                                | 165  | 15% | 155  | 14% |
| South West                                                | 81   | 7%  | 89   | 8%  |
| Wales                                                     | 51   | 5%  | 55   | 5%  |
| West Midlands                                             | 94   | 8%  | 100  | 9%  |
| Yorkshire/Humberlands                                     | 90   | 8%  | 100  | 9%  |
| Not on map                                                | 0    | 0%  | 0    | 0%  |
| <b>Ethnicity</b>                                          |      |     |      |     |
| White or White British                                    | 1057 | 95% | 1065 | 96% |
| Mixed race                                                | 7    | 1%  | 8    | 1%  |
| Asian or Asian British (not Chinese)                      | 18   | 2%  | 17   | 1%  |
| Black or Black British                                    | 19   | 2%  | 12   | 1%  |
| Chinese                                                   | 2    | 0%  | 2    | 0%  |
| Other ethnic group                                        | 4    | 0%  | 2    | 0%  |
| Prefer not to say                                         | 3    | 0%  | 2    | 0%  |
| <b>Religion</b>                                           |      |     |      |     |
| Christianity                                              | 677  | 61% | 673  | 61% |
| Islam                                                     | 13   | 1%  | 11   | 1%  |
| Hinduism                                                  | 6    | 1%  | 6    | 1%  |
| Sikhism                                                   | 0    | 0%  | 0    | 0%  |
| Judaism                                                   | 6    | 1%  | 4    | 1%  |
| Buddhism                                                  | 11   | 1%  | 1    | 0%  |
| Other religion                                            | 15   | 1%  | 8    | 0%  |
| No religion                                               | 370  | 33% | 205  | 38% |
| Prefer not to say                                         | 12   | 1%  | 7    | 1%  |
| <b>To what extent do you consider yourself religious?</b> |      |     |      |     |
| Not at all religious                                      | 234  | 32% | 234  | 32% |
| Moderately religious                                      | 422  | 58% | 424  | 59% |
| Very religious                                            | 64   | 9%  | 56   | 8%  |
| Prefer not to say                                         | 8    | 1%  | 7    | 1%  |
| <b>Education</b>                                          |      |     |      |     |
| No formal qualification                                   | 70   | 6%  | 66   | 6%  |
| GCSE, O level, Scottish Standard Grade or equivalent      | 264  | 24% | 252  | 23% |



## Appendix VI

## Results of survey –unweighted and weighted

|                                          |     |     |     |     |
|------------------------------------------|-----|-----|-----|-----|
| GCE, A-level, Scottish Higher or similar | 214 | 19% | 214 | 19% |
| Vocational (BTEC/NVQ/Diploma)            | 230 | 21% | 237 | 21% |
| Degree level or above                    | 317 | 29% | 330 | 30% |
| Prefer not to say                        | 15  | 1%  | 10  | 1%  |

### Q9 How would you describe your own level of knowledge about the medical research process including the use of human tissue samples?

|                | Unweighted |      | Weighted |      |
|----------------|------------|------|----------|------|
|                | N          | %    | N        | %    |
| No knowledge   | 463        | 42%  | 466      | 42 % |
| Some knowledge | 603        | 54 % | 602      | 54 % |
| Good knowledge | 44         | 4 %  | 43       | 4 %  |

### Q10 Are you or have you ever been affected by a long-standing illness, disability or infirmity which has required continuous or frequent medical attention

|     | Unweighted |      | Weighted |     |
|-----|------------|------|----------|-----|
|     | N          | %    | N        | %   |
| Yes | 399        | 36 % | 391      | 35% |
| No  | 711        | 64 % | 719      | 65% |

### Q11 Has a close family member ever been affected by a long-standing illness, disability or infirmity which has required continuous or frequent medical attention

|     | Unweighted |      | Weighted |     |
|-----|------------|------|----------|-----|
|     | N          | %    | N        | %   |
| Yes | 767        | 69 % | 765      | 69% |
| No  | 343        | 31 % | 345      | 31% |

### Q12 Have you ever had blood or tissue removed during a medical or surgical procedure?

|  | Unweighted | Weighted |
|--|------------|----------|
|  |            |          |

## Appendix VI

## Results of survey –unweighted and weighted

|            | N   | %    | N   | %   |
|------------|-----|------|-----|-----|
| Yes        | 446 | 40 % | 444 | 40% |
| No         | 553 | 50 % | 551 | 50% |
| Don't Know | 111 | 10 % | 115 | 10% |

### Q13 Have you ever been asked to donate any blood or tissue for medical research?

|            | Unweighted |      | Weighted |     |
|------------|------------|------|----------|-----|
|            | N          | %    | N        | %   |
| Yes        | 182        | 16 % | 177      | 16% |
| No         | 904        | 81 % | 907      | 82% |
| Don't Know | 24         | 2 %  | 25       | 2%  |

### Q14 Did you agree to donate?

|            | Unweighted |      | Weighted |     |
|------------|------------|------|----------|-----|
|            | N          | %    | N        | %   |
| Yes        | 155        | 85 % | 153      | 86% |
| No         | 23         | 13 % | 21       | 12% |
| Don't Know | 4          | 2 %  | 3        | 2%  |

### Q15 On a scale of 1 to 5 with 1 being Not At All Important and 5 being Extremely Important, how important do you think it is for people to donate samples for medical research?

|                        | Unweighted |      | Weighted |     |
|------------------------|------------|------|----------|-----|
|                        | N          | %    | N        | %   |
| 1 Not at all important | 5          | 0 %  | 4        | 0%  |
| 2                      | 10         | 1 %  | 9        | 1%  |
| 3                      | 78         | 7 %  | 76       | 7%  |
| 4                      | 406        | 37 % | 408      | 37% |
| 5 Extremely important  | 554        | 50 % | 567      | 51% |
| Don't know             | 57         | 5 %  | 46       | 4%  |

## Appendix VI

Results of survey –unweighted and weighted

### Q16 In general, would you like to be asked to donate samples for medical research?

|                | Unweighted |      | Weighted |     |
|----------------|------------|------|----------|-----|
|                | N          | %    | N        | %   |
| Definitely yes | 317        | 29 % | 327      | 29% |
| Probably yes   | 513        | 46 % | 526      | 47% |
| Probably not   | 157        | 14 % | 145      | 13% |
| Definitely not | 42         | 4 %  | 35       | 3%  |
| Don't know     | 81         | 7 %  | 77       | 7%  |

### Q17 Would you donate the following types of samples for medical research if they were left over following the procedure?

|                                  |   | Unweighted |          |          |         |            | Weighted |          |          |         |            |
|----------------------------------|---|------------|----------|----------|---------|------------|----------|----------|----------|---------|------------|
|                                  |   | Def yes    | Prob yes | Prob not | Def not | Don't know | Def yes  | Prob yes | Prob not | Def not | Don't know |
| Blood                            | N | 587        | 433      | 48       | 23      | 19         | 599      | 425      | 48       | 20      | 8          |
|                                  | % | 53%        | 39%      | 4%       | 2%      | 2%         | 54%      | 38%      | 4%       | 2%      | 2%         |
| Skin Tissue                      | N | 520        | 451      | 72       | 32      | 35         | 533      | 451      | 67       | 28      | 32         |
|                                  | % | 47%        | 41%      | 6%       | 3%      | 3%         | 48%      | 41%      | 6%       | 3%      | 3%         |
| Fat                              | N | 530        | 450      | 60       | 32      | 38         | 541      | 449      | 56       | 26      | 37         |
|                                  | % | 48 %       | 41%      | 5%       | 3%      | 3%         | 49%      | 40%      | 5%       | 2%      | 3%         |
| Cancerous Tissue                 | N | 572        | 425      | 52       | 26      | 35         | 586      | 420      | 49       | 22      | 34         |
|                                  | % | 52 %       | 38%      | 5%       | 2%      | 3%         | 53%      | 38%      | 4%       | 2%      | 3%         |
| Liver Tissue                     | N | 463        | 468      | 100      | 38      | 41         | 474      | 476      | 96       | 34      | 39         |
|                                  | % | 42 %       | 42%      | 9%       | 3%      | 4%         | 43%      | 42%      | 9%       | 3%      | 4%         |
| Bone or Cartilage                | N | 472        | 460      | 90       | 46      | 42         | 482      | 460      | 87       | 41      | 40         |
|                                  | % | 43 %       | 41%      | 8%       | 4%      | 4%         | 43%      | 41%      | 8%       | 4%      | 4%         |
| Spare eggs not fertilised during | N | 133        | 159      | 121      | 104     | 89         | 128      | 149      | 111      | 93      | 86         |
|                                  | % | 22 %       | 26%      | 20%      | 17%     | 15%        | 23%      | 26%      | 20%      | 16%     | 15%        |

## Appendix VI

## Results of survey –unweighted and weighted

|               |   |      |     |     |     |     |     |     |     |     |     |
|---------------|---|------|-----|-----|-----|-----|-----|-----|-----|-----|-----|
| IVF *         |   |      |     |     |     |     |     |     |     |     |     |
| Spare embryos | N | 225  | 245 | 217 | 223 | 200 | 230 | 254 | 210 | 213 | 203 |
|               | % | 20 % | 22% | 20% | 20% | 18% | 21% | 23% | 19% | 19% | 18% |

\*Female Only

### Q18 Would you agree to donate the following samples specifically for medical research?

|                                                  |   | Unweighted |          |          |         |            | Weighted |          |          |         |            |
|--------------------------------------------------|---|------------|----------|----------|---------|------------|----------|----------|----------|---------|------------|
|                                                  |   | Def yes    | Prob yes | Prob not | Def not | Don't know | Def yes  | Prob yes | Prob not | Def not | Don't know |
| Saliva                                           | N | 568        | 423      | 54       | 30      | 35         | 581      | 413      | 55       | 27      | 34         |
|                                                  | % | 51 %       | 38%      | 5%       | 3%      | 3%         | 52%      | 37%      | 5%       | 2%      | 3%         |
| Urine                                            | N | 553        | 432      | 61       | 33      | 31         | 566      | 424      | 60       | 30      | 30         |
|                                                  | % | 50 %       | 39%      | 5%       | 3%      | 3%         | 51%      | 38%      | 5%       | 3%      | 3%         |
| Blood                                            | N | 455        | 448      | 118      | 47      | 42         | 496      | 446      | 107      | 46      | 42         |
|                                                  | % | 41 %       | 40%      | 11%      | 4%      | 4%         | 42%      | 40%      | 10%      | 4%      | 4%         |
| Tissue collected requiring a local anaesthetic   | N | 273        | 463      | 197      | 100     | 77         | 283      | 471      | 190      | 88      | 78         |
|                                                  | % | 25 %       | 42%      | 18%      | 9%      | 7%         | 26%      | 42%      | 17%      | 8%      | 7%         |
| Tissue collected requiring a general anaesthetic | N | 166        | 286      | 310      | 235     | 113        | 172      | 300      | 309      | 214     | 115        |
|                                                  | % | 15 %       | 26%      | 28%      | 21%     | 10%        | 16%      | 27%      | 28%      | 19%     | 10%        |
| Sperm *                                          | N | 120        | 171      | 104      | 66      | 43         | 135      | 188      | 111      | 64      | 46         |
|                                                  | % | 24 %       | 34%      | 21%      | 13%     | 9%         | 25%      | 35%      | 20%      | 12%     | 9%         |

\*Men only

## Appendix VI

## Results of survey –unweighted and weighted

| Q19 In the event of your death, would you be willing to donate the following samples for medical research? |   |            |          |          |         |            |          |          |          |         |            |  |
|------------------------------------------------------------------------------------------------------------|---|------------|----------|----------|---------|------------|----------|----------|----------|---------|------------|--|
|                                                                                                            |   | Unweighted |          |          |         |            | Weighted |          |          |         |            |  |
|                                                                                                            |   | Def yes    | Prob yes | Prob not | Def not | Don't know | Def yes  | Prob yes | Prob not | Def not | Don't know |  |
| A small sample of your liver                                                                               | N | 485        | 390      | 88       | 51      | 96         | 491      | 391      | 84       | 48      | 96         |  |
|                                                                                                            | % | 44 %       | 35%      | 8%       | 5%      | 9%         | 44%      | 35%      | 8%       | 4%      | 9%         |  |
| A small sample of your brain                                                                               | N | 429        | 304      | 166      | 96      | 115        | 438      | 305      | 158      | 94      | 116        |  |
|                                                                                                            | % | 39 %       | 27%      | 15%      | 9%      | 10%        | 39%      | 27%      | 14%      | 8%      | 10%        |  |
| A whole liver                                                                                              | N | 430        | 319      | 158      | 87      | 116        | 438      | 316      | 154      | 84      | 118        |  |
|                                                                                                            | % | 39 %       | 29%      | 14%      | 8%      | 10%        | 39%      | 28%      | 14%      | 8%      | 11%        |  |
| A whole brain                                                                                              | N | 353        | 234      | 221      | 150     | 152        | 360      | 236      | 214      | 145     | 155        |  |
|                                                                                                            | % | 32 %       | 21%      | 20%      | 14%     | 14%        | 32%      | 21%      | 19%      | 13%     | 14%        |  |

| Q20 You are having surgery for a health issue which requires a general anaesthetic. The surgeon asks you whether you would be willing to consent to any additional tissue? |   |            |          |          |         |            |          |          |          |         |            |  |
|----------------------------------------------------------------------------------------------------------------------------------------------------------------------------|---|------------|----------|----------|---------|------------|----------|----------|----------|---------|------------|--|
|                                                                                                                                                                            |   | Unweighted |          |          |         |            | Weighted |          |          |         |            |  |
|                                                                                                                                                                            |   | Def yes    | Prob yes | Prob not | Def not | Don't know | Def yes  | Prob yes | Prob not | Def not | Don't know |  |
| From the same part of the body                                                                                                                                             | N | 328        | 530      | 115      | 51      | 86         | 342      | 523      | 112      | 50      | 83         |  |
|                                                                                                                                                                            | % | 30 %       | 48%      | 10%      | 5%      | 8%         | 31%      | 47%      | 10%      | 5%      | 7%         |  |
| Samples taken from an area close by                                                                                                                                        | N | 219        | 481      | 212      | 89      | 109        | 229      | 490      | 206      | 81      | 104        |  |
|                                                                                                                                                                            | % | 20 %       | 43%      | 19%      | 8%      | 10%        | 21%      | 44%      | 19%      | 7%      | 9%         |  |
| Samples involving an                                                                                                                                                       | N | 154        | 336      | 298      | 204     | 118        | 164      | 348      | 301      | 180     | 118        |  |
|                                                                                                                                                                            | % | 14 %       | 30%      | 27%      | 18%     | 11%        | 15%      | 31%      | 27%      | 16%     | 11%        |  |

## Appendix VI

## Results of survey –unweighted and weighted

|                         |  |  |  |  |  |  |  |  |  |  |  |  |
|-------------------------|--|--|--|--|--|--|--|--|--|--|--|--|
| additional<br>procedure |  |  |  |  |  |  |  |  |  |  |  |  |
|-------------------------|--|--|--|--|--|--|--|--|--|--|--|--|

| Q21 You are having surgery for a health issue which requires a general anaesthetic. The surgeon asks you whether you would be willing to consent to any additional tissue? |   |            |          |          |         |            |          |          |          |         |            |  |
|----------------------------------------------------------------------------------------------------------------------------------------------------------------------------|---|------------|----------|----------|---------|------------|----------|----------|----------|---------|------------|--|
|                                                                                                                                                                            |   | Unweighted |          |          |         |            | Weighted |          |          |         |            |  |
|                                                                                                                                                                            |   | Def yes    | Prob yes | Prob not | Def not | Don't know | Def yes  | Prob yes | Prob not | Def not | Don't know |  |
| Understanding how our body fights disease                                                                                                                                  | N | 390        | 558      | 72       | 27      | 63         | 399      | 554      | 71       | 24      | 62         |  |
|                                                                                                                                                                            | % | 35 %       | 50%      | 6%       | 2%      | 6%         | 36%      | 50%      | 6%       | 2%      | 6%         |  |
| Understanding how our genetic makeup...                                                                                                                                    | N | 305        | 558      | 115      | 47      | 85         | 312      | 564      | 107      | 43      | 83         |  |
|                                                                                                                                                                            | % | 27 %       | 50%      | 10%      | 4%      | 8%         | 28%      | 51%      | 10%      | 4%      | 8%         |  |
| Research that is testing new treatments                                                                                                                                    | N | 318        | 511      | 132      | 52      | 97         | 325      | 502      | 133      | 50      | 99         |  |
|                                                                                                                                                                            | % | 29 %       | 46%      | 12%      | 5%      | 9%         | 29%      | 45%      | 12%      | 5%      | 9%         |  |
| Research involving cells from embryos                                                                                                                                      | N | 157        | 304      | 228      | 214     | 207        | 167      | 319      | 225      | 199     | 200        |  |
|                                                                                                                                                                            | % | 14 %       | 27%      | 21%      | 19%     | 19%        | 15%      | 29%      | 20%      | 18%     | 18%        |  |
| Research involving animals                                                                                                                                                 | N | 107        | 270      | 281      | 318     | 134        | 117      | 285      | 271      | 304     | 132        |  |
|                                                                                                                                                                            | % | 10%        | 24%      | 25%      | 29%     | 12%        | 11%      | 26%      | 24%      | 27%     | 12%        |  |
| Research outside the UK                                                                                                                                                    | N | 109        | 273      | 350      | 199     | 179        | 115      | 277      | 349      | 199     | 170        |  |
|                                                                                                                                                                            | % | 10 %       | 25%      | 32%      | 18%     | 16%        | 10%      | 25%      | 31%      | 18%     | 15%        |  |

## Appendix VI

## Results of survey –unweighted and weighted

| Q22 Would you be willing to donate samples to be used by the following organisations? |   |            |          |          |         |            |          |          |          |         |            |
|---------------------------------------------------------------------------------------|---|------------|----------|----------|---------|------------|----------|----------|----------|---------|------------|
|                                                                                       |   | Unweighted |          |          |         |            | Weighted |          |          |         |            |
|                                                                                       |   | Def yes    | Prob yes | Prob not | Def not | Don't know | Def yes  | Prob yes | Prob not | Def not | Don't know |
| NHS Hospitals                                                                         | N | 367        | 570      | 69       | 31      | 73         | 379      | 569      | 65       | 28      | 70         |
|                                                                                       | % | 33 %       | 51%      | 6%       | 3%      | 7%         | 34%      | 51%      | 6%       | 2%      | 6%         |
| Universities                                                                          | N | 243        | 515      | 185      | 56      | 111        | 255      | 519      | 173      | 54      | 108        |
|                                                                                       | % | 22 %       | 46%      | 17%      | 5%      | 10%        | 23%      | 47%      | 16%      | 5%      | 10%        |
| Medical Research Charities                                                            | N | 307        | 563      | 107      | 41      | 92         | 311      | 561      | 108      | 39      | 91         |
|                                                                                       | % | 28 %       | 51%      | 10%      | 4%      | 8%         | 28%      | 51%      | 10%      | 4%      | 8%         |
| Pharmaceutical Companies                                                              | N | 138        | 487      | 233      | 93      | 159        | 139      | 490      | 227      | 95      | 161        |
|                                                                                       | % | 12 %       | 44%      | 21%      | 8%      | 14%        | 12%      | 44%      | 20%      | 9%      | 14%        |
| Diagnostic Companies                                                                  | N | 187        | 515      | 180      | 74      | 154        | 182      | 511      | 183      | 74      | 159        |
|                                                                                       | % | 17 %       | 46%      | 16%      | 7%      | 14%        | 16%      | 46%      | 17%      | 7%      | 14%        |

**Q23 How important do you think it is that you are first asked for your permission (often known as 'consent') for any leftover samples to be used for medical research?**

|                        | Unweighted |      | Weighted |     |
|------------------------|------------|------|----------|-----|
|                        | N          | %    | N        | %   |
| 1 Not at all important | 40         | 4 %  | 42       | 4%  |
| 2                      | 41         | 4 %  | 43       | 4%  |
| 3                      | 104        | 9 %  | 103      | 9%  |
| 4                      | 274        | 25 % | 268      | 24% |
| 5 Extremely important  | 615        | 55 % | 614      | 55% |
| Don't know             | 36         | 3 %  | 40       | 4%  |

## Appendix VI

## Results of survey –unweighted and weighted

**Q24 How important do you think it is that you are first asked for your permission (often known as 'consent') for any leftover samples to be used for medical research?**

|               | Unweighted |      | Weighted |     |
|---------------|------------|------|----------|-----|
|               | N          | %    | N        | %   |
| Opt-in        | 605        | 55 % | 598      | 54% |
| Opt-out       | 308        | 28 % | 321      | 29% |
| No preference | 151        | 14 % | 146      | 13% |
| Don't know    | 46         | 4 %  | 45       | 4%  |

**Q25 Which of these three approaches do you prefer?**

|                           | Unweighted |      | Weighted |     |
|---------------------------|------------|------|----------|-----|
|                           | N          | %    | N        | %   |
| Consent every time        | 472        | 43 % | 480      | 43% |
| Consent once for life     | 231        | 21 % | 237      | 21% |
| Consent at certain points | 301        | 27 % | 298      | 27% |
| No preference             | 82         | 7 %  | 72       | 7%  |
| Don't know                | 24         | 2 %  | 22       | 2%  |

**Q26 If you were going to be asked to donate left over samples for medical research every time you had a medical procedure, would you rather this was discussed with you by a health professional before the medical procedure or afterwards?**

|               | Unweighted |      | Weighted |     |
|---------------|------------|------|----------|-----|
|               | N          | %    | N        | %   |
| Before        | 897        | 81 % | 908      | 82% |
| After         | 48         | 4 %  | 48       | 4%  |
| No preference | 151        | 14 % | 142      | 13% |
| Don't know    | 14         | 1 %  | 12       | 1%  |



## Appendix VI

## Results of survey –unweighted and weighted

**Q27 If a consent once for life system was in place, when would you prefer to be asked about consenting left over samples for medical research?**

|                                     | Unweighted |      | Weighted |     |
|-------------------------------------|------------|------|----------|-----|
|                                     | N          | %    | N        | %   |
| When registering at a GP surgery    | 425        | 39 % | 419      | 38% |
| During a routine GP appointment     | 386        | 35 % | 380      | 34% |
| When applying for a driving licence | 83         | 8 %  | 88       | 8%  |
| When applying for a passport        | 75         | 7 %  | 80       | 7%  |
| The first time I visit the hospital | 233        | 21 % | 228      | 21% |
| The first time I have a medical     | 513        | 47 % | 510      | 46% |

**Q28 If a consent once for life system was in place, when would you prefer to be asked about consenting left over samples for medical research?**

|                                            | Unweighted |      | Weighted |     |
|--------------------------------------------|------------|------|----------|-----|
|                                            | N          | %    | N        | %   |
| Face to face with a health professional    | 720        | 65 % | 727      | 65% |
| Letter                                     | 66         | 6 %  | 64       | 6%  |
| Email                                      | 30         | 3 %  | 32       | 3%  |
| Telephone                                  | 14         | 1 %  | 13       | 1%  |
| Via a website                              | 60         | 5 %  | 61       | 6%  |
| Completing a form and returning it by post | 161        | 15 % | 160      | 14% |
| Other (please specify)                     | 4          | 0 %  | 4        | 0%  |
| Don't know                                 | 55         | 5 %  | 49       | 4%  |

**Q29 If you later decided you didn't want your samples to be used for medical research, what would be your preferred way to withdraw that consent?**

|                                         | Unweighted |      | Weighted |     |
|-----------------------------------------|------------|------|----------|-----|
|                                         | N          | %    | N        | %   |
| Face to face with a health professional | 421        | 38 % | 424      | 38% |
| Letter                                  | 95         | 9 %  | 92       | 8%  |
| Email                                   | 89         | 8 %  | 93       | 8%  |
| Telephone                               | 56         | 5 %  | 51       | 5%  |
| Via a website                           | 137        | 12 % | 144      | 13% |

## Appendix VI

## Results of survey –unweighted and weighted

|                                            |     |      |     |     |
|--------------------------------------------|-----|------|-----|-----|
| Completing a form and returning it by post | 243 | 22 % | 244 | 22% |
| Other (please specify)                     | 8   | 1 %  | 6   | 1%  |
| Don't know                                 | 61  | 5 %  | 55  | 5%  |

### Q30 How likely would you be to donate samples for medical research using the following models of consent?

|                                      |   | Unweighted |          |          |         |            | Weighted |          |          |         |            |
|--------------------------------------|---|------------|----------|----------|---------|------------|----------|----------|----------|---------|------------|
|                                      |   | Def yes    | Prob yes | Prob not | Def not | Don't know | Def yes  | Prob yes | Prob not | Def not | Don't know |
| Generic                              | N | 216        | 528      | 163      | 64      | 139        | 228      | 538      | 154      | 52      | 38         |
|                                      | % | 19 %       | 48%      | 15%      | 6%      | 13%        | 21%      | 48%      | 14%      | 5%      | 12%        |
| Tiered                               | N | 242        | 549      | 125      | 55      | 139        | 244      | 560      | 124      | 49      | 133        |
|                                      | % | 22 %       | 49%      | 11%      | 5%      | 13%        | 22%      | 50%      | 11%      | 4%      | 12%        |
| Specific                             | N | 336        | 553      | 88       | 28      | 105        | 339      | 551      | 89       | 29      | 102        |
|                                      | % | 30 %       | 50%      | 8%       | 3%      | 9%         | 31%      | 50%      | 8%       | 3%      | 9%         |
| Specific consent for every new study | N | 293        | 560      | 110      | 27      | 120        | 300      | 560      | 109      | 26      | 115        |
|                                      | % | 26 %       | 50%      | 10%      | 2%      | 11%        | 27%      | 50%      | 10%      | 2%      | 10%        |

### Q31 Which of these four types of consent do you prefer?

| Preferences     | Generic    |     |          |     |
|-----------------|------------|-----|----------|-----|
|                 | Unweighted |     | Weighted |     |
|                 | N          | %   | N        | %   |
| 1 <sup>st</sup> | 200        | 18% | 207      | 19% |
| 2 <sup>nd</sup> | 159        | 14% | 163      | 15% |
| 3 <sup>rd</sup> | 168        | 15% | 168      | 15% |
| 4 <sup>th</sup> | 344        | 31% | 327      | 30% |
| Preferences     | Tiered     |     |          |     |
|                 | Unweighted |     | Weighted |     |
|                 | N          | %   | N        | %   |
| 1 <sup>st</sup> | 156        | 14% | 152      | 14% |
| 2 <sup>nd</sup> | 246        | 22% | 252      | 23% |

## Appendix VI

## Results of survey –unweighted and weighted

|                              |     |     |     |     |
|------------------------------|-----|-----|-----|-----|
| 3 <sup>rd</sup>              | 360 | 32% | 355 | 32% |
| 4 <sup>th</sup>              | 105 | 10% | 106 | 10% |
| <b>Specific (once only)</b>  |     |     |     |     |
| 1 <sup>st</sup>              | 198 | 18% | 183 | 17% |
| 2 <sup>nd</sup>              | 306 | 28% | 304 | 27% |
| 3 <sup>rd</sup>              | 202 | 18% | 209 | 19% |
| 4 <sup>th</sup>              | 161 | 15% | 169 | 15% |
| <b>Specific (every time)</b> |     |     |     |     |
| 1 <sup>st</sup>              | 341 | 31% | 323 | 29% |
| 2 <sup>nd</sup>              | 157 | 14% | 146 | 13% |
| 3 <sup>rd</sup>              | 138 | 12% | 133 | 12% |
| 4 <sup>th</sup>              | 258 | 23% | 263 | 24% |
| Don't Know                   | 63  | 6%  | 62  | 6%  |
| No Preference                | 181 | 16% | 183 | 17% |

**Q32 If your preferred system of consent was not available, what would you do?**

|                                              | Unweighted |      | Weighted |     |
|----------------------------------------------|------------|------|----------|-----|
|                                              | N          | %    | N        | %   |
| I would agree to give generic consent        | 348        | 52 % | 350      | 53% |
| I would rather my sample was not used at all | 187        | 28 % | 172      | 26% |
| Don't know                                   | 133        | 20 % | 135      | 21% |

**Q33 If there was a sample that you considered to be sensitive, but were still willing to donate for medical research, which of the four types of consent would you prefer to give?**

|                              | Unweighted |      | Weighted |     |
|------------------------------|------------|------|----------|-----|
|                              | N          | %    | N        | %   |
| Generic Consent              | 131        | 12 % | 135      | 12% |
| Tiered Consent               | 105        | 9 %  | 101      | 9%  |
| Specific Consent - once only | 246        | 22 % | 228      | 21% |
| Consent for every new study  | 278        | 25 % | 288      | 26% |

## Appendix VI

## Results of survey –unweighted and weighted

|               |     |      |     |     |
|---------------|-----|------|-----|-----|
| No Preference | 206 | 19 % | 216 | 19% |
| Don't Know    | 144 | 13 % | 142 | 13% |

### Q34 Would you be willing to have your anonymised medical records linked to your sample?

|                | Unweighted |      | Weighted |     |
|----------------|------------|------|----------|-----|
|                | N          | %    | N        | %   |
| Definitely yes | 266        | 24 % | 279      | 25% |
| Probably yes   | 493        | 44 % | 497      | 45% |
| Probably not   | 165        | 15 % | 157      | 14% |
| Definitely not | 77         | 7 %  | 71       | 6%  |
| Don't know     | 109        | 10 % | 107      | 10% |

### Q35 Would you be willing to have your anonymised lifestyle information linked to your sample?

|                | Unweighted |      | Weighted |     |
|----------------|------------|------|----------|-----|
|                | N          | %    | N        | %   |
| Definitely yes | 377        | 34 % | 398      | 35% |
| Probably yes   | 530        | 48 % | 527      | 47% |
| Probably not   | 90         | 8 %  | 90       | 8%  |
| Definitely not | 48         | 4 %  | 43       | 4%  |
| Don't know     | 65         | 6 %  | 61       | 5%  |

### Q36 How would you like to get information on medical research including research on a particular condition that might use your sample?

|                                                   | Unweighted |      | Weighted |     |
|---------------------------------------------------|------------|------|----------|-----|
|                                                   | N          | %    | N        | %   |
| Website                                           | 295        | 27 % | 304      | 27% |
| Newsletter                                        | 104        | 9 %  | 97       | 9%  |
| Email                                             | 302        | 27 % | 315      | 28% |
| Letter                                            | 241        | 22 % | 228      | 21% |
| Would not be interested in additional information | 168        | 15 % | 166      | 15% |

## Appendix VI

Results of survey –unweighted and weighted

**Q37 Are there any particular organs you would not feel comfortable donating in the event of your death?**

|         | Unweighted |     | Weighted |     |
|---------|------------|-----|----------|-----|
|         | N          | %   | N        | %   |
| Brain   | 337        | 31% | 329      | 30% |
| Eyes    | 307        | 28% | 308      | 28% |
| Heart   | 128        | 12% | 121      | 11% |
| Kidneys | 60         | 5 % | 59       | 5%  |
| Liver   | 68         | 6 % | 65       | 6%  |
| Lungs   | 67         | 6%  | 63       | 6%  |

**Q38 If you were considering donating whole organs for medical research in the event of your death, are there any particular organs you would not feel comfortable donating?**

|                                                                                   | Unweighted |      | Weighted |     |
|-----------------------------------------------------------------------------------|------------|------|----------|-----|
|                                                                                   | N          | %    | N        | %   |
| Yes, I would donate an organ for research if it was not suitable for transplant   | 755        | 68 % | 766      | 69% |
| No, if they can't be used for transplant I would prefer they were not used at all | 125        | 11 % | 121      | 11% |
| I would not agree to donate an organ for transplant                               | 96         | 9 %  | 95       | 9%  |
| Don't know                                                                        | 134        | 12 % | 128      | 12% |

## Appendix VI

## Results of survey –unweighted and weighted

| Q40 Would you be willing to have your anonymised lifestyle information linked to your sample?                        |            |      |            |      |          |      |
|----------------------------------------------------------------------------------------------------------------------|------------|------|------------|------|----------|------|
|                                                                                                                      | Unweighted |      | Unweighted |      | Weighted |      |
|                                                                                                                      | N          | %    | N          | %    | N        | %    |
| Yes                                                                                                                  | 174        | 16 % | 166        | 15 % | 166      | 15 % |
| No                                                                                                                   | 789        | 77 % | 580        | 52 % | 800      | 72 % |
| Don't know                                                                                                           | 147        | 13 % | 144        | 13 % | 144      | 13 % |
| It should be obtained at the same time as consent for organ transplantation and recorded on the organ donor register |            |      | 270        | 24 % | 267      | 24 % |
| It should be discussed at a GP appointment and recorded in the patients' notes                                       |            |      | 140        | 13 % | 143      | 13 % |
| Other                                                                                                                |            |      | 13         | 1 %  | 14       | 1 %  |
| Don't know                                                                                                           |            |      | 107        | 10 % | 108      | 10 % |

Note: percentages may not add up to 100% due to rounding.
